# Supplementary material for: Differential sensitivity to LINE 1-induced damage contributes to the expansion of Tet2-deficient HSCs upon chronic inflammatory stress
Source: Research Square preprint supplement (doi:10.21203/rs.3.rs-7934135/v1), 2025-10-29
Supplement: Supplementary file 1 [file 9f35ccae27e330a35382fab5.xlsx]

## Sheet: WT-LPS vs WT p<0.05
Table S1. Differentially H3K9me3 enriched TEs in WT-LPS vs WT pvalue<0.05
seqnames	start	end	width	range	ID	comb_ClassFamily	Class	Familly	log2(Conc_WT_LPS)	log2(Conc_WT)	log2 Fold	p.value	status
chr4	144836090	144836170	81	chr4_144836090_144836170	L1_Mur1	LINE/L1	LINE	L1	0	3.66296501272243	-3.66296501272243	0.000434157677246242	down
chr4	144835440	144835520	81	chr4_144835440_144835520	L1_Mur1	LINE/L1	LINE	L1	0	3.62449086490779	-3.62449086490779	0.000492214179548211	down
chr9	116837435	116838578	1144	chr9_116837435_116838578	B3A	SINE/B2	SINE	B2	0	3.58496250072116	-3.58496250072116	0.00427557811589126	down
chr4	144836194	144836274	81	chr4_144836194_144836274	L1_Mur1	LINE/L1	LINE	L1	0	3.50250034052918	-3.50250034052918	0.0071356573207119	down
chr4	154680186	154681990	1805	chr4_154680186_154681990	ORR1C1-int	LTR/ERVL-MaLR	LTR	ERVL-MaLR	0	3.4594316186373	-3.4594316186373	0.0179466396857038	down
chr4	144835986	144836066	81	chr4_144835986_144836066	L1_Mur1	LINE/L1	LINE	L1	0	3.32192809488736	-3.32192809488736	0.00992081543317682	down
chr4	144835336	144835416	81	chr4_144835336_144835416	Lx2B2	LINE/L1	LINE	L1	0	3.27301849440642	-3.27301849440642	0.00273930441441984	down
chr4	144835128	144835208	81	chr4_144835128_144835208	Lx2B2	LINE/L1	LINE	L1	0	3.16992500144231	-3.16992500144231	0.0158124777260782	down
chrX	24953652	24959339	5688	chrX_24953652_24959339	Lx	LINE/L1	LINE	L1	0	3.16992500144231	-3.16992500144231	0.00914665333960847	down
chr8	84308909	84310563	1655	chr8_84308909_84310563	RMER17C-int	LTR/ERVK	LTR	ERVK	0	3.05889368905357	-3.05889368905357	0.00177576861253356	down
chr5	94841727	94842865	1139	chr5_94841727_94842865	Lx7	LINE/L1	LINE	L1	0	3.05889368905357	-3.05889368905357	0.00229933520334607	down
chr12	91601354	91603107	1754	chr12_91601354_91603107	L1MdGf_I	LINE/L1	LINE	L1	0	3	-3	0.0185321066282705	down
chr4	144835232	144835312	81	chr4_144835232_144835312	L1_Mur1	LINE/L1	LINE	L1	0	3	-3	0.00230225366915469	down
chr9	82371052	82372654	1603	chr9_82371052_82372654	L1MdGf_I	LINE/L1	LINE	L1	0	3	-3	0.0154516175357785	down
chrX	137411942	137418184	6243	chrX_137411942_137418184	L1MdF_III	LINE/L1	LINE	L1	0	3	-3	0.0144666042685309	down
chr12	102845444	102851350	5907	chr12_102845444_102851350	L1MdA_VII	LINE/L1	LINE	L1	0	2.93859945533586	-2.93859945533586	0.0208312022312365	down
chr14	26688540	26689859	1320	chr14_26688540_26689859	Lx7	LINE/L1	LINE	L1	0	2.93859945533586	-2.93859945533586	0.0125096825726135	down
chr4	144836402	144836482	81	chr4_144836402_144836482	L1_Mur1	LINE/L1	LINE	L1	0	2.93859945533586	-2.93859945533586	0.00266879135281019	down
chr7	29863990	29866891	2902	chr7_29863990_29866891	RMER15-int	LTR/ERVL	LTR	ERVL	1.32192809488736	4.1963972128035	-2.87446911791614	0.012785787338466	down
chr4	27165727	27170226	4500	chr4_27165727_27170226	L1MdF_I	LINE/L1	LINE	L1	0	2.8073549220576	-2.8073549220576	0.00194683082867817	down
chr7	41366340	41369798	3459	chr7_41366340_41369798	L1MdF_II	LINE/L1	LINE	L1	0	2.8073549220576	-2.8073549220576	0.0282721907083238	down
chrX	56109297	56109967	671	chrX_56109297_56109967	L1MdF_IV	LINE/L1	LINE	L1	0	2.8073549220576	-2.8073549220576	0.0451607079716868	down
chr2	125957174	125961714	4541	chr2_125957174_125961714	IAPEy-int	LTR/ERVK	LTR	ERVK	0	2.73696559416621	-2.73696559416621	0.0253639470264738	down
chr4	144836298	144836378	81	chr4_144836298_144836378	L1_Mur1	LINE/L1	LINE	L1	0.584962500721156	3.32192809488736	-2.73696559416621	0.0249074752917036	down
chr6	41363668	41369166	5499	chr6_41363668_41369166	L1MdGf_II	LINE/L1	LINE	L1	0	2.73696559416621	-2.73696559416621	0.0340465486315496	down
chr7	34471925	34472611	687	chr7_34471925_34472611	RSINE1	SINE/B4	SINE	B4	0	2.66296501272243	-2.66296501272243	0.0102771703480121	down
chr1	118242246	118248449	6204	chr1_118242246_118248449	L1MdF_I	LINE/L1	LINE	L1	0	2.66296501272243	-2.66296501272243	0.0451440979128501	down
chr1	95151799	95158103	6305	chr1_95151799_95158103	L1MdF_I	LINE/L1	LINE	L1	0	2.66296501272243	-2.66296501272243	0.0490928427020809	down
chr12	88013263	88017974	4712	chr12_88013263_88017974	L1MdF_II	LINE/L1	LINE	L1	0	2.66296501272243	-2.66296501272243	0.0475387433247904	down
chr6	131636971	131643099	6129	chr6_131636971_131643099	L1MdF_I	LINE/L1	LINE	L1	0	2.66296501272243	-2.66296501272243	0.0301141529880797	down
chr9	85061852	85066366	4515	chr9_85061852_85066366	L1MdF_I	LINE/L1	LINE	L1	0	2.66296501272243	-2.66296501272243	0.0479812246884844	down
chr13	76374334	76375417	1084	chr13_76374334_76375417	L1MdMus_II	LINE/L1	LINE	L1	0	2.58496250072116	-2.58496250072116	0.0429377968275016	down
chr3	39702318	39703564	1247	chr3_39702318_39703564	MusHAL1	LINE/L1	LINE	L1	0	2.58496250072116	-2.58496250072116	0.0169212310856609	down
chr4	94167638	94169460	1823	chr4_94167638_94169460	L1MdGf_II	LINE/L1	LINE	L1	0	2.58496250072116	-2.58496250072116	0.0340082387269031	down
chr5	61519869	61520064	196	chr5_61519869_61520064	Lx3A	LINE/L1	LINE	L1	0	2.58496250072116	-2.58496250072116	0.0421317849595594	down
chr10	48715984	48722478	6495	chr10_48715984_48722478	L1MdF_I	LINE/L1	LINE	L1	0	2.50250034052918	-2.50250034052918	0.046755594686561	down
chr15	16507547	16512541	4995	chr15_16507547_16512541	L1MdF_III	LINE/L1	LINE	L1	0	2.50250034052918	-2.50250034052918	0.0429789181603799	down
chr4	144835882	144835962	81	chr4_144835882_144835962	L1_Mur1	LINE/L1	LINE	L1	0	2.50250034052918	-2.50250034052918	0.00821904541235819	down
chr9	95826303	95827068	766	chr9_95826303_95827068	L1MC3	LINE/L1	LINE	L1	0	2.50250034052918	-2.50250034052918	0.018018112634713	down
chrX	25057049	25062876	5828	chrX_25057049_25062876	MuRRS4-int	LTR/ERV1	LTR	ERV1	1	3.36923380966572	-2.36923380966572	0.0127477312677314	down
chr8	42202314	42203306	993	chr8_42202314_42203306	L1MdGf_I	LINE/L1	LINE	L1	1	3.36923380966572	-2.36923380966572	0.0123727986914189	down
chr13	87989475	87991360	1886	chr13_87989475_87991360	MTA_Mm-int	LTR/ERVL-MaLR	LTR	ERVL-MaLR	0.584962500721156	2.93859945533586	-2.3536369546147	0.0370787872047168	down
chrX	65781613	65783498	1886	chrX_65781613_65783498	MTA_Mm-int	LTR/ERVL-MaLR	LTR	ERVL-MaLR	0.584962500721156	2.93859945533586	-2.3536369546147	0.0461669880474745	down
chr3	13340815	13346916	6102	chr3_13340815_13346916	L1MdF_II	LINE/L1	LINE	L1	0.584962500721156	2.93859945533586	-2.3536369546147	0.0420909464595536	down
chr5	93965009	93971064	6056	chr5_93965009_93971064	Lx5b	LINE/L1	LINE	L1	0.584962500721156	2.93859945533586	-2.3536369546147	0.0442900452618556	down
chr4	112343389	112349549	6161	chr4_112343389_112349549	L1MdA_III	LINE/L1	LINE	L1	1.32192809488736	3.66296501272243	-2.34103691783507	0.0135702058567882	down
chr16	88496495	88496934	440	chr16_88496495_88496934	RSINE1	SINE/B4	SINE	B4	0	2.32192809488736	-2.32192809488736	0.023732974006197	down
chr7	26828722	26829191	470	chr7_26828722_26829191	B1_Mm	SINE/Alu	SINE	Alu	1.8073549220576	4.02974734339405	-2.22239242133645	0.0421407797780119	down
chr10	93233003	93233542	540	chr10_93233003_93233542	B4A	SINE/B4	SINE	B4	0	2.22239242133645	-2.22239242133645	0.0132848403128104	down
chr10	130304311	130309170	4860	chr10_130304311_130309170	L1MdF_II	LINE/L1	LINE	L1	0.584962500721156	2.8073549220576	-2.22239242133645	0.0479741759165476	down
chr17	57487567	57490514	2948	chr17_57487567_57490514	L1MdA_VI	LINE/L1	LINE	L1	0	2.22239242133645	-2.22239242133645	0.0130538951630726	down
chr8	65499804	65506195	6392	chr8_65499804_65506195	L1MdA_III	LINE/L1	LINE	L1	1.32192809488736	3.54432051622381	-2.22239242133645	0.00833565214279844	down
chrX	45131078	45137241	6164	chrX_45131078_45137241	L1MdN_I	LINE/L1	LINE	L1	0	2.22239242133645	-2.22239242133645	0.0170473669482387	down
chr1	98600393	98603736	3344	chr1_98600393_98603736	IAPEz-int	LTR/ERVK	LTR	ERVK	1.32192809488736	3.50250034052918	-2.18057224564182	0.0113927849201785	down
chr12	11592166	11598399	6234	chr12_11592166_11598399	L1MdF_I	LINE/L1	LINE	L1	1	3.16992500144231	-2.16992500144231	0.026961768258421	down
chr13	98994559	98995255	697	chr13_98994559_98995255	RLTR4_Mm	LTR/ERV1	LTR	ERV1	0	2.11547721741994	-2.11547721741994	0.0173183886170502	down
chr1	117990083	117992986	2904	chr1_117990083_117992986	IAPEz-int	LTR/ERVK	LTR	ERVK	0	2.11547721741994	-2.11547721741994	0.0158009662728321	down
chr1	118150933	118153524	2592	chr1_118150933_118153524	IAPEz-int	LTR/ERVK	LTR	ERVK	0	2.11547721741994	-2.11547721741994	0.0227594620578844	down
chr18	23113954	23116620	2667	chr18_23113954_23116620	IAPEz-int	LTR/ERVK	LTR	ERVK	1	3.11547721741994	-2.11547721741994	0.0284466422269473	down
chr15	18404946	18410996	6051	chr15_18404946_18410996	L1MdF_I	LINE/L1	LINE	L1	1	3.11547721741994	-2.11547721741994	0.032013911598592	down
chrX	68810551	68811533	983	chrX_68810551_68811533	L1MdF_I	LINE/L1	LINE	L1	0	2.11547721741994	-2.11547721741994	0.018017380335823	down
chr5	95091494	95097596	6103	chr5_95091494_95097596	L1MdF_I	LINE/L1	LINE	L1	1.32192809488736	3.41503749927884	-2.09310940439148	0.0192055256261444	down
chr4	114068304	114079229	10926	chr4_114068304_114079229	L1MdA_III	LINE/L1	LINE	L1	1.58496250072116	3.66296501272243	-2.07800251200127	0.00785997965877942	down
chr10	57579082	57582457	3376	chr10_57579082_57582457	L1MdF_I	LINE/L1	LINE	L1	1	3.05889368905357	-2.05889368905357	0.040210218001762	down
chr2	76274115	76280361	6247	chr2_76274115_76280361	L1MdF_II	LINE/L1	LINE	L1	1.32192809488736	3.36923380966572	-2.04730571477836	0.0245404346196092	down
chr2	161798660	161799754	1095	chr2_161798660_161799754	B3A	SINE/B2	SINE	B2	0	2	-2	0.0480727628712064	down
chr10	4935214	4938041	2828	chr10_4935214_4938041	RLTR10-int	LTR/ERVK	LTR	ERVK	1.32192809488736	3.32192809488736	-2	0.0241834288926637	down
chr4	42220755	42226364	5610	chr4_42220755_42226364	ETnERV-int	LTR/ERVK	LTR	ERVK	1.32192809488736	3.32192809488736	-2	0.0265586841347508	down
chr9	12269687	12277083	7397	chr9_12269687_12277083	ETnERV-int	LTR/ERVK	LTR	ERVK	1	3	-2	0.0444672127112069	down
chr13	87838362	87843762	5401	chr13_87838362_87843762	L1MdF_I	LINE/L1	LINE	L1	0	2	-2	0.0223902336908612	down
chr2	41880358	41882516	2159	chr2_41880358_41882516	L1MdA_IV	LINE/L1	LINE	L1	0	2	-2	0.0211775663992623	down
chr6	110422444	110425057	2614	chr6_110422444_110425057	L1MdMus_II	LINE/L1	LINE	L1	0	2	-2	0.0231127527795499	down
chrX	26302870	26308027	5158	chrX_26302870_26308027	L1Lx_I	LINE/L1	LINE	L1	0	2	-2	0.0211775663992623	down
chrX	79530605	79533664	3060	chrX_79530605_79533664	RLTR10-int	LTR/ERVK	LTR	ERVK	1.58496250072116	3.54432051622381	-1.95935801550265	0.0231560502987985	down
chrX	136685012	136687592	2581	chrX_136685012_136687592	RLTR10-int	LTR/ERVK	LTR	ERVK	1.32192809488736	3.27301849440642	-1.95109039951905	0.0280269877622646	down
chr14	113155068	113160158	5091	chr14_113155068_113160158	L1MdF_I	LINE/L1	LINE	L1	1.32192809488736	3.27301849440642	-1.95109039951905	0.031056670343299	down
chr5	60546777	60550512	3736	chr5_60546777_60550512	L1MdGf_I	LINE/L1	LINE	L1	1.32192809488736	3.27301849440642	-1.95109039951905	0.0296962839126821	down
chr16	65030325	65033217	2893	chr16_65030325_65033217	RLTR10-int	LTR/ERVK	LTR	ERVK	1.32192809488736	3.22239242133645	-1.90046432644909	0.0358383982668131	down
chr6	10073845	10079733	5889	chr6_10073845_10079733	L1MdA_III	LINE/L1	LINE	L1	1.32192809488736	3.22239242133645	-1.90046432644909	0.0358162453241618	down
chr7	110759073	110761635	2563	chr7_110759073_110761635	L1MdGf_II	LINE/L1	LINE	L1	1.8073549220576	3.70043971814109	-1.89308479608349	0.0212294160888315	down
chr18	52417224	52418217	994	chr18_52417224_52418217	L1MdA_IV	LINE/L1	LINE	L1	0	1.87446911791614	-1.87446911791614	0.030096523653413	down
chr4	34256824	34259214	2391	chr4_34256824_34259214	L1MdF_I	LINE/L1	LINE	L1	0	1.87446911791614	-1.87446911791614	0.031614592966757	down
chr4	89108206	89109621	1416	chr4_89108206_89109621	L1MdF_III	LINE/L1	LINE	L1	0	1.87446911791614	-1.87446911791614	0.0300896751485019	down
chr5	69882804	69884579	1776	chr5_69882804_69884579	L1MdTf_I	LINE/L1	LINE	L1	1.58496250072116	3.4594316186373	-1.87446911791614	0.0311669714617619	down
chr8	30165077	30168950	3874	chr8_30165077_30168950	L1MdTf_III	LINE/L1	LINE	L1	1.58496250072116	3.4594316186373	-1.87446911791614	0.0206798766933237	down
chrX	63840860	63843720	2861	chrX_63840860_63843720	L1MdF_I	LINE/L1	LINE	L1	0	1.87446911791614	-1.87446911791614	0.0316188314809311	down
chr18	27415971	27420383	4413	chr18_27415971_27420383	L1MdA_III	LINE/L1	LINE	L1	1.32192809488736	3.16992500144231	-1.84799690655495	0.0387392858578188	down
chr3	106081229	106087236	6008	chr3_106081229_106087236	L1MdF_I	LINE/L1	LINE	L1	1.8073549220576	3.62449086490779	-1.81713594285019	0.0225781016489188	down
chr17	46317084	46320146	3063	chr17_46317084_46320146	RLTR10-int	LTR/ERVK	LTR	ERVK	1.58496250072116	3.32192809488736	-1.73696559416621	0.0423397594285195	down
chr1	130230096	130231985	1890	chr1_130230096_130231985	MTA_Mm-int	LTR/ERVL-MaLR	LTR	ERVL-MaLR	0	1.73696559416621	-1.73696559416621	0.0444662003427668	down
chr19	21965091	21966979	1889	chr19_21965091_21966979	MTA_Mm-int	LTR/ERVL-MaLR	LTR	ERVL-MaLR	0	1.73696559416621	-1.73696559416621	0.041426596318566	down
chr1	169535038	169536361	1324	chr1_169535038_169536361	L1MdA_III	LINE/L1	LINE	L1	0	1.73696559416621	-1.73696559416621	0.0414316888400493	down
chr10	56618267	56624422	6156	chr10_56618267_56624422	L1MdF_I	LINE/L1	LINE	L1	1.58496250072116	3.32192809488736	-1.73696559416621	0.0423661243490183	down
chr10	92038184	92039824	1641	chr10_92038184_92039824	L1MdA_IV	LINE/L1	LINE	L1	0	1.73696559416621	-1.73696559416621	0.044479634207877	down
chr11	33897328	33901646	4319	chr11_33897328_33901646	L1MdF_IV	LINE/L1	LINE	L1	0	1.73696559416621	-1.73696559416621	0.044460720769267	down
chr16	18486958	18490239	3282	chr16_18486958_18490239	L1MdF_IV	LINE/L1	LINE	L1	0	1.73696559416621	-1.73696559416621	0.0482612245240205	down
chr16	29188025	29188601	577	chr16_29188025_29188601	L1MdA_VII	LINE/L1	LINE	L1	0	1.73696559416621	-1.73696559416621	0.0414316888400493	down
chr16	77227499	77230815	3317	chr16_77227499_77230815	L1MdF_III	LINE/L1	LINE	L1	0	1.73696559416621	-1.73696559416621	0.0444906006917674	down
chr2	150068923	150075052	6130	chr2_150068923_150075052	L1MdF_I	LINE/L1	LINE	L1	1.8073549220576	3.54432051622381	-1.73696559416621	0.029755609612297	down
chr4	88885555	88887524	1970	chr4_88885555_88887524	L1MdF_V	LINE/L1	LINE	L1	0	1.73696559416621	-1.73696559416621	0.0444662003427668	down
chr5	95721916	95723903	1988	chr5_95721916_95723903	L1_Mur2	LINE/L1	LINE	L1	0	1.73696559416621	-1.73696559416621	0.044460720769267	down
chrX	91295767	91297377	1611	chrX_91295767_91297377	L1MdTf_III	LINE/L1	LINE	L1	0	1.73696559416621	-1.73696559416621	0.0483044927284173	down
chr16	82207637	82212185	4549	chr16_82207637_82212185	IAPEy-int	LTR/ERVK	LTR	ERVK	1.8073549220576	3.50250034052918	-1.69514541847158	0.0295058292584614	down
chr15	29131255	29133920	2666	chr15_29131255_29133920	IAPEz-int	LTR/ERVK	LTR	ERVK	1.58496250072116	3.27301849440642	-1.68805599368526	0.0415984191423457	down
chr1	177923518	177926361	2844	chr1_177923518_177926361	RLTR10-int	LTR/ERVK	LTR	ERVK	2.16992500144231	3.84130225398094	-1.67137725253863	0.0220035389468549	down
chr12	77878918	77885120	6203	chr12_77878918_77885120	L1MdTf_III	LINE/L1	LINE	L1	2.70043971814109	4.36923380966572	-1.66879409152463	0.00307765838372504	down
chr9	76672600	76675361	2762	chr9_76672600_76675361	RLTR10-int	LTR/ERVK	LTR	ERVK	2	3.66296501272243	-1.66296501272243	0.0241338168081004	down
chr5	27865947	27871976	6030	chr5_27865947_27871976	L1MdF_I	LINE/L1	LINE	L1	1.8073549220576	3.4594316186373	-1.65207669657969	0.0366745696397756	down
chr17	36294113	36297633	3521	chr17_36294113_36297633	L1MdGf_I	LINE/L1	LINE	L1	2.32192809488736	3.96962635095648	-1.64769825606912	0.0118706090781512	down
chr1	27755095	27761312	6218	chr1_27755095_27761312	L1MdTf_I	LINE/L1	LINE	L1	3	4.62449086490779	-1.62449086490779	0.00161412283781676	down
chr3	126030123	126035610	5488	chr3_126030123_126035610	MMETn-int	LTR/ERVK	LTR	ERVK	1.8073549220576	3.41503749927884	-1.60768257722124	0.0428260191857459	down
chr1	166607788	166613306	5519	chr1_166607788_166613306	L1MdA_III	LINE/L1	LINE	L1	1.8073549220576	3.41503749927884	-1.60768257722124	0.0499051030150694	down
chr15	11045866	11052019	6154	chr15_11045866_11052019	L1MdF_I	LINE/L1	LINE	L1	2.16992500144231	3.77258950389693	-1.60266450245462	0.0248648648593699	down
chr5	132729431	132735647	6217	chr5_132729431_132735647	L1MdTf_II	LINE/L1	LINE	L1	3.16992500144231	4.77258950389693	-1.60266450245462	0.00293344826580232	down
chr11	16071195	16077467	6273	chr11_16071195_16077467	L1MdA_III	LINE/L1	LINE	L1	2	3.58496250072116	-1.58496250072116	0.0386876478919095	down
chr4	80241164	80247506	6343	chr4_80241164_80247506	L1MdA_III	LINE/L1	LINE	L1	2	3.58496250072116	-1.58496250072116	0.0330107774954563	down
chr1	111957408	111963591	6184	chr1_111957408_111963591	L1MdA_II	LINE/L1	LINE	L1	2.90689059560852	4.48112668973662	-1.5742360941281	0.00317699397461541	down
chr1	178211213	178215128	3916	chr1_178211213_178215128	L1MdGf_II	LINE/L1	LINE	L1	1.8073549220576	3.36923380966572	-1.56187888760812	0.047498852210445	down
chr5	11658699	11661306	2608	chr5_11658699_11661306	L1MdA_II	LINE/L1	LINE	L1	1.8073549220576	3.36923380966572	-1.56187888760812	0.049900486300458	down
chr2	123744949	123748467	3519	chr2_123744949_123748467	L1MdA_II	LINE/L1	LINE	L1	2.32192809488736	3.87446911791614	-1.55254102302878	0.0197076608050794	down
chrX	22384443	22391928	7486	chrX_22384443_22391928	ETnERV-int	LTR/ERVK	LTR	ERVK	2.58496250072116	4.11547721741994	-1.53051471669878	0.0141380496366923	down
chr19	27402007	27408160	6154	chr19_27402007_27408160	L1MdGf_II	LINE/L1	LINE	L1	2.16992500144231	3.70043971814109	-1.53051471669878	0.0323033107119345	down
chr14	44061478	44067892	6415	chr14_44061478_44067892	L1MdGf_II	LINE/L1	LINE	L1	2	3.50250034052918	-1.50250034052918	0.0467283692805469	down
chrX	50506682	50510267	3586	chrX_50506682_50510267	L1MdGf_I	LINE/L1	LINE	L1	2	3.50250034052918	-1.50250034052918	0.0409266545806081	down
chr6	66486418	66489958	3541	chr6_66486418_66489958	IAPEz-int	LTR/ERVK	LTR	ERVK	2.70043971814109	4.1963972128035	-1.49595749466241	0.0117583700058182	down
chr2	28486950	28493232	6283	chr2_28486950_28493232	MMERVK10C-int	LTR/ERVK	LTR	ERVK	2.16992500144231	3.66296501272243	-1.49304001128012	0.0344611780748235	down
chr13	11692861	11696568	3708	chr13_11692861_11696568	L1MdTf_III	LINE/L1	LINE	L1	2.16992500144231	3.66296501272243	-1.49304001128012	0.0453351879195534	down
chr2	97733649	97739890	6242	chr2_97733649_97739890	L1MdTf_III	LINE/L1	LINE	L1	2.16992500144231	3.66296501272243	-1.49304001128012	0.0404995758299297	down
chr10	114526157	114532533	6377	chr10_114526157_114532533	L1MdGf_II	LINE/L1	LINE	L1	2.32192809488736	3.8073549220576	-1.48542682717024	0.0235445967198572	down
chrX	85661656	85667681	6026	chrX_85661656_85667681	L1MdA_III	LINE/L1	LINE	L1	2.32192809488736	3.8073549220576	-1.48542682717024	0.0314626736313141	down
chr1	23295734	23301110	5377	chr1_23295734_23301110	L1MdTf_II	LINE/L1	LINE	L1	2.58496250072116	4.05889368905357	-1.47393118833241	0.0168839315828947	down
chr13	27983191	27989605	6415	chr13_27983191_27989605	L1MdA_III	LINE/L1	LINE	L1	2.58496250072116	4.05889368905357	-1.47393118833241	0.0217588060444753	down
chr15	45695050	45701549	6500	chr15_45695050_45701549	L1MdGf_II	LINE/L1	LINE	L1	2.58496250072116	4.05889368905357	-1.47393118833241	0.0156711349412344	down
chrX	124432990	124437603	4614	chrX_124432990_124437603	L1MdA_III	LINE/L1	LINE	L1	2	3.4594316186373	-1.4594316186373	0.0498401964016166	down
chr12	93103753	93109159	5407	chr12_93103753_93109159	ETnERV-int	LTR/ERVK	LTR	ERVK	2.16992500144231	3.58496250072116	-1.41503749927884	0.0461926819378024	down
chr6	35700786	35703563	2778	chr6_35700786_35703563	RLTR10-int	LTR/ERVK	LTR	ERVK	2.16992500144231	3.58496250072116	-1.41503749927884	0.04556156476112	down
chr8	63015252	63019095	3844	chr8_63015252_63019095	IAPEz-int	LTR/ERVK	LTR	ERVK	2.16992500144231	3.58496250072116	-1.41503749927884	0.0474133250813924	down
chr9	36088668	36095534	6867	chr9_36088668_36095534	ETnERV-int	LTR/ERVK	LTR	ERVK	2.58496250072116	4	-1.41503749927884	0.0348023768890987	down
chr12	98115709	98121888	6180	chr12_98115709_98121888	L1MdA_III	LINE/L1	LINE	L1	2.16992500144231	3.58496250072116	-1.41503749927884	0.044969012145986	down
chrX	108400191	108405010	4820	chrX_108400191_108405010	L1MdA_II	LINE/L1	LINE	L1	2.4594316186373	3.87446911791614	-1.41503749927884	0.0336368911183919	down
chr4	88053613	88059733	6121	chr4_88053613_88059733	L1MdTf_II	LINE/L1	LINE	L1	3.4594316186373	4.84130225398094	-1.38187063534364	0.00402747913742701	down
chr6	33200455	33206678	6224	chr6_33200455_33206678	L1MdF_I	LINE/L1	LINE	L1	2.4594316186373	3.84130225398094	-1.38187063534364	0.0359810395621935	down
chr13	8895886	8902747	6862	chr13_8895886_8902747	ETnERV-int	LTR/ERVK	LTR	ERVK	2.32192809488736	3.70043971814109	-1.37851162325373	0.0420072815067718	down
chrX	46359891	46363207	3317	chrX_46359891_46363207	RLTR10-int	LTR/ERVK	LTR	ERVK	2.32192809488736	3.70043971814109	-1.37851162325373	0.0443876087086547	down
chr1	173156243	173162437	6195	chr1_173156243_173162437	L1MdA_III	LINE/L1	LINE	L1	2.32192809488736	3.70043971814109	-1.37851162325373	0.0428942656811538	down
chr6	97136895	97138810	1916	chr6_97136895_97138810	L1MdGf_I	LINE/L1	LINE	L1	2.32192809488736	3.70043971814109	-1.37851162325373	0.048896534365957	down
chr10	6080158	6088966	8809	chr10_6080158_6088966	RLTR6-int	LTR/ERV1	LTR	ERV1	3.16992500144231	4.54432051622381	-1.3743955147815	0.0156522504799988	down
chr16	80759900	80766969	7070	chr16_80759900_80766969	IAPEz-int	LTR/ERVK	LTR	ERVK	4.24792751344359	5.61470984411521	-1.36678233067162	0.000191332944626157	down
chr13	104484557	104489457	4901	chr13_104484557_104489457	L1MdTf_III	LINE/L1	LINE	L1	2.90689059560852	4.27301849440642	-1.3661278987979	0.0255642843926003	down
chr4	43812291	43818674	6384	chr4_43812291_43818674	L1MdTf_III	LINE/L1	LINE	L1	2.90689059560852	4.27301849440642	-1.3661278987979	0.0172741473825307	down
chr1	79276060	79282187	6128	chr1_79276060_79282187	L1MdA_III	LINE/L1	LINE	L1	2.70043971814109	4.05889368905357	-1.35845397091248	0.0280133148270782	down
chrX	143136816	143143547	6732	chrX_143136816_143143547	L1MdA_VI	LINE/L1	LINE	L1	3	4.34577483684173	-1.34577483684173	0.0194730767012077	down
chr5	54773246	54778682	5437	chr5_54773246_54778682	L1MdA_II	LINE/L1	LINE	L1	2.70043971814109	4.02974734339405	-1.32930762525296	0.0323230961383875	down
chr14	9415179	9423870	8692	chr14_9415179_9423870	RLTR6-int	LTR/ERV1	LTR	ERV1	3	4.32192809488736	-1.32192809488736	0.0196857567887373	down
chrX	17781261	17788663	7403	chrX_17781261_17788663	ETnERV-int	LTR/ERVK	LTR	ERVK	2.58496250072116	3.90689059560852	-1.32192809488736	0.0384097817857647	down
chr7	87376758	87383522	6765	chr7_87376758_87383522	L1MdGf_I	LINE/L1	LINE	L1	3.8073549220576	5.12928301694497	-1.32192809488736	0.00251804270856991	down
chr14	16974083	16980503	6421	chr14_16974083_16980503	L1MdTf_II	LINE/L1	LINE	L1	3.24792751344359	4.56478461878353	-1.31685710533994	0.00940199160734543	down
chr5	73587594	73593692	6099	chr5_73587594_73593692	L1MdF_I	LINE/L1	LINE	L1	2.4594316186373	3.77258950389693	-1.31315788525963	0.0477574376928763	down
chr7	52325756	52334170	8415	chr7_52325756_52334170	MMERGLN-int	LTR/ERV1	LTR	ERV1	3.16992500144231	4.48112668973662	-1.3112016882943	0.0104569954807673	down
chr5	48524170	48529096	4927	chr5_48524170_48529096	L1MdTf_III	LINE/L1	LINE	L1	2.8073549220576	4.11547721741994	-1.30812229536233	0.0246292775339669	down
chr12	66254174	66260411	6238	chr12_66254174_66260411	L1MdTf_III	LINE/L1	LINE	L1	2.70043971814109	4	-1.29956028185891	0.0319975836317962	down
chrX	80378780	80384946	6167	chrX_80378780_80384946	L1MdA_II	LINE/L1	LINE	L1	3	4.29768054864069	-1.29768054864069	0.0193247929931868	down
chr4	59342784	59348968	6185	chr4_59342784_59348968	L1MdA_III	LINE/L1	LINE	L1	2.58496250072116	3.87446911791614	-1.28950661719499	0.0442675965373826	down
chrX	115660523	115666922	6400	chrX_115660523_115666922	L1MdTf_III	LINE/L1	LINE	L1	2.90689059560852	4.1963972128035	-1.28950661719498	0.0221157599954711	down
chrX	25009854	25014489	4636	chrX_25009854_25014489	L1MdTf_II	LINE/L1	LINE	L1	2.90689059560852	4.1963972128035	-1.28950661719498	0.0392446321437136	down
chr1	23301117	23306356	5240	chr1_23301117_23306356	IAPEz-int	LTR/ERVK	LTR	ERVK	3.08746284125034	4.36923380966572	-1.28177096841538	0.0175207122051486	down
chr4	99994514	100000711	6198	chr4_99994514_100000711	L1MdGf_II	LINE/L1	LINE	L1	2.70043971814109	3.96962635095648	-1.26918663281539	0.0345422524885708	down
chr16	91248341	91255042	6702	chr16_91248341_91255042	ETnERV-int	LTR/ERVK	LTR	ERVK	2.90689059560852	4.16992500144231	-1.26303440583379	0.0262090091518069	down
chr17	68528869	68535246	6378	chr17_68528869_68535246	L1MdA_II	LINE/L1	LINE	L1	3.32192809488736	4.58496250072116	-1.26303440583379	0.0182813009040979	down
chr1	145101055	145105081	4027	chr1_145101055_145105081	L1MdTf_II	LINE/L1	LINE	L1	2.8073549220576	4.05889368905357	-1.25153876699596	0.0319663837199929	down
chr16	48543173	48547951	4779	chr16_48543173_48547951	L1MdA_II	LINE/L1	LINE	L1	2.8073549220576	4.05889368905357	-1.25153876699596	0.0319672830947147	down
chr3	73428133	73434326	6194	chr3_73428133_73434326	L1MdA_II	LINE/L1	LINE	L1	3	4.24792751344359	-1.24792751344359	0.0248334878101336	down
chr5	89395488	89401652	6165	chr5_89395488_89401652	L1MdA_III	LINE/L1	LINE	L1	3	4.24792751344359	-1.24792751344359	0.0211586052925864	down
chr11	47419241	47427867	8627	chr11_47419241_47427867	RLTR6-int	LTR/ERV1	LTR	ERV1	3.16992500144231	4.41503749927884	-1.24511249783653	0.0194136483027732	down
chr4	39266360	39272641	6282	chr4_39266360_39272641	L1MdTf_III	LINE/L1	LINE	L1	3.16992500144231	4.41503749927884	-1.24511249783653	0.0237229651466856	down
chr4	140939015	140943836	4822	chr4_140939015_140943836	IAPEz-int	LTR/ERVK	LTR	ERVK	2.90689059560852	4.14295795384204	-1.23606735823352	0.035081922593826	down
chr4	37757433	37763881	6449	chr4_37757433_37763881	L1MdTf_III	LINE/L1	LINE	L1	2.90689059560852	4.14295795384204	-1.23606735823352	0.0363485023041256	down
chr3	67535288	67541736	6449	chr3_67535288_67541736	L1MdTf_II	LINE/L1	LINE	L1	3.64385618977472	4.87446911791614	-1.23061292814142	0.0100616561235461	down
chr14	123066933	123073340	6408	chr14_123066933_123073340	L1MdA_II	LINE/L1	LINE	L1	3.16992500144231	4.39231742277876	-1.22239242133645	0.0246253109782994	down
chr18	28009603	28015823	6221	chr18_28009603_28015823	L1MdTf_III	LINE/L1	LINE	L1	2.8073549220576	4.02974734339405	-1.22239242133645	0.0364525519117926	down
chr8	104893526	104899734	6209	chr8_104893526_104899734	L1MdGf_II	LINE/L1	LINE	L1	2.8073549220576	4.02974734339405	-1.22239242133645	0.0393069782307181	down
chr19	33286286	33292743	6458	chr19_33286286_33292743	L1MdTf_II	LINE/L1	LINE	L1	3.39231742277876	4.60486205815886	-1.2125446353801	0.0152513859450106	down
chr7	30689337	30696923	7587	chr7_30689337_30696923	RLTR4_MM-int	LTR/ERV1	LTR	ERV1	3.24792751344359	4.4594316186373	-1.21150410519371	0.0158812337002238	down
chr11	47794168	47800520	6353	chr11_47794168_47800520	L1MdA_III	LINE/L1	LINE	L1	3.24792751344359	4.4594316186373	-1.21150410519371	0.0307220802982641	down
chr9	26157223	26164883	7661	chr9_26157223_26164883	RLTR6-int	LTR/ERV1	LTR	ERV1	2.90689059560852	4.11547721741994	-1.20858662181142	0.0460030119496509	down
chr18	5868299	5875754	7456	chr18_5868299_5875754	ETnERV-int	LTR/ERVK	LTR	ERVK	2.90689059560852	4.11547721741994	-1.20858662181142	0.035548292144555	down
chrX	56410300	56414520	4221	chrX_56410300_56414520	L1MdTf_I	LINE/L1	LINE	L1	2.90689059560852	4.11547721741994	-1.20858662181142	0.0336707945326779	down
chr16	77932373	77938563	6191	chr16_77932373_77938563	L1MdA_III	LINE/L1	LINE	L1	2.70043971814109	3.90689059560852	-1.20645087746743	0.0441348992010082	down
chr11	21906988	21913422	6435	chr11_21906988_21913422	L1MdTf_I	LINE/L1	LINE	L1	3.85798099512757	5.05889368905357	-1.200912693926	0.00685875127722688	down
chr3	33599664	33606050	6387	chr3_33599664_33606050	L1MdTf_III	LINE/L1	LINE	L1	3	4.1963972128035	-1.1963972128035	0.0491468950015814	down
chr5	42000510	42005819	5310	chr5_42000510_42005819	L1MdTf_I	LINE/L1	LINE	L1	3	4.1963972128035	-1.1963972128035	0.0458338326080537	down
chr4	12319763	12326078	6316	chr4_12319763_12326078	L1MdTf_II	LINE/L1	LINE	L1	3.39231742277876	4.58496250072116	-1.1926450779424	0.0205899827139361	down
chr7	85926414	85933495	7082	chr7_85926414_85933495	IAPEz-int	LTR/ERVK	LTR	ERVK	4.4262647547021	5.61470984411521	-1.18844508941311	0.00231280848839905	down
chr4	69171213	69177456	6244	chr4_69171213_69177456	L1MdTf_III	LINE/L1	LINE	L1	3.08746284125034	4.27301849440642	-1.18555565315608	0.026187677532334	down
chr3	81308671	81315027	6357	chr3_81308671_81315027	L1MdA_II	LINE/L1	LINE	L1	2.90689059560852	4.08746284125034	-1.18057224564182	0.042675404598038	down
chr7	104027604	104034674	7071	chr7_104027604_104034674	L1MdTf_I	LINE/L1	LINE	L1	2.90689059560852	4.08746284125034	-1.18057224564182	0.0412813936467637	down
chr19	13042034	13050770	8737	chr19_13042034_13050770	RLTR6-int	LTR/ERV1	LTR	ERV1	3.16992500144231	4.34577483684173	-1.17584983539942	0.0380766673410511	down
chr10	41437345	41444914	7570	chr10_41437345_41444914	RLTR4_MM-int	LTR/ERV1	LTR	ERV1	3.58496250072116	4.75488750216347	-1.16992500144231	0.00921456786785022	down
chr8	13719305	13724342	5038	chr8_13719305_13724342	IAPEz-int	LTR/ERVK	LTR	ERVK	3.58496250072116	4.75488750216347	-1.16992500144231	0.0115243756535671	down
chr1	47080695	47086821	6127	chr1_47080695_47086821	L1MdTf_II	LINE/L1	LINE	L1	3.58496250072116	4.75488750216347	-1.16992500144231	0.0244267123635494	down
chr10	27254764	27261181	6418	chr10_27254764_27261181	L1MdTf_II	LINE/L1	LINE	L1	3	4.16992500144231	-1.16992500144231	0.0344003246241216	down
chrX	105020407	105026725	6319	chrX_105020407_105026725	L1MdGf_II	LINE/L1	LINE	L1	3	4.16992500144231	-1.16992500144231	0.035868164067298	down
chrX	155681665	155688179	6515	chrX_155681665_155688179	L1MdGf_I	LINE/L1	LINE	L1	3.64385618977472	4.8073549220576	-1.16349873228288	0.014580977291577	down
chr12	54774921	54782508	7588	chr12_54774921_54782508	RLTR4_MM-int	LTR/ERV1	LTR	ERV1	3.70043971814109	4.85798099512757	-1.15754127698648	0.0112689192147266	down
chr1	148553277	148559474	6198	chr1_148553277_148559474	L1MdTf_III	LINE/L1	LINE	L1	2.90689059560852	4.05889368905357	-1.15200309344505	0.0450794699337379	down
chr7	121850861	121855997	5137	chr7_121850861_121855997	IAPEz-int	LTR/ERVK	LTR	ERVK	3.64385618977472	4.79007693062577	-1.14622074085104	0.0175073450624259	down
chr3	157411094	157416385	5292	chr3_157411094_157416385	L1MdA_III	LINE/L1	LINE	L1	3	4.14295795384204	-1.14295795384204	0.0393093988351365	down
chr17	45020811	45027066	6256	chr17_45020811_45027066	L1MdTf_III	LINE/L1	LINE	L1	3.32192809488736	4.4594316186373	-1.13750352374994	0.0404852919167736	down
chr6	60095037	60101320	6284	chr6_60095037_60101320	L1MdTf_III	LINE/L1	LINE	L1	3.32192809488736	4.4594316186373	-1.13750352374994	0.0207426594366261	down
chrX	157282976	157289657	6682	chrX_157282976_157289657	L1MdTf_III	LINE/L1	LINE	L1	3.32192809488736	4.4594316186373	-1.13750352374994	0.034762765121942	down
chr17	20747079	20755756	8678	chr17_20747079_20755756	RLTR6-int	LTR/ERV1	LTR	ERV1	3.08746284125034	4.22239242133645	-1.13492958008611	0.0372650666200648	down
chr10	98160794	98167050	6257	chr10_98160794_98167050	L1MdTf_III	LINE/L1	LINE	L1	3.08746284125034	4.22239242133645	-1.13492958008611	0.0329712731668938	down
chr13	40831563	40837737	6175	chr13_40831563_40837737	L1MdA_III	LINE/L1	LINE	L1	3.16992500144231	4.29768054864069	-1.12775554719837	0.035973994840194	down
chr6	105662968	105669857	6890	chr6_105662968_105669857	L1MdGf_I	LINE/L1	LINE	L1	4.16992500144231	5.29768054864069	-1.12775554719837	0.00471325322539332	down
chr6	75455764	75461968	6205	chr6_75455764_75461968	L1MdA_II	LINE/L1	LINE	L1	3.16992500144231	4.29768054864069	-1.12775554719837	0.0302785308248837	down
chr17	63553039	63559313	6275	chr17_63553039_63559313	L1MdGf_I	LINE/L1	LINE	L1	3.4594316186373	4.58496250072116	-1.12553088208386	0.019237519183748	down
chr5	44135057	44142644	7588	chr5_44135057_44142644	RLTR4_MM-int	LTR/ERV1	LTR	ERV1	3.70043971814109	4.82442843541655	-1.12398871727545	0.0100219432430963	down
chr11	10448744	10455135	6392	chr11_10448744_10455135	L1MdA_II	LINE/L1	LINE	L1	3.24792751344359	4.36923380966572	-1.12130629622213	0.036259094656697	down
chr15	26242024	26248465	6442	chr15_26242024_26248465	L1MdTf_I	LINE/L1	LINE	L1	3.95419631038688	5.07324898203064	-1.11905267164376	0.0145427104786336	down
chr4	12467408	12474086	6679	chr4_12467408_12474086	L1MdTf_III	LINE/L1	LINE	L1	3.95419631038688	5.07324898203064	-1.11905267164376	0.00896635658072931	down
chr1	98201135	98207515	6381	chr1_98201135_98207515	L1MdTf_III	LINE/L1	LINE	L1	3	4.11547721741994	-1.11547721741994	0.0454152091811375	down
chr5	58399607	58406437	6831	chr5_58399607_58406437	L1MdTf_II	LINE/L1	LINE	L1	3.85798099512757	4.96962635095648	-1.11164535582891	0.00884819522884311	down
chr8	102004918	102010279	5362	chr8_102004918_102010279	IAPEz-int	LTR/ERVK	LTR	ERVK	3.64385618977472	4.75488750216347	-1.11103131238874	0.0154400516199938	down
chr14	36539458	36545835	6378	chr14_36539458_36545835	L1MdA_II	LINE/L1	LINE	L1	3.4594316186373	4.56478461878353	-1.10535300014623	0.023064411993433	down
chr1	5993096	5999353	6258	chr1_5993096_5999353	L1MdTf_III	LINE/L1	LINE	L1	3.52356195605701	4.62449086490779	-1.10092890885078	0.0269946349516852	down
chr7	20448266	20454756	6491	chr7_20448266_20454756	L1MdTf_I	LINE/L1	LINE	L1	3.8073549220576	4.90689059560852	-1.09953567355091	0.0129398391791831	down
chr5	55837336	55844200	6865	chr5_55837336_55844200	L1MdGf_I	LINE/L1	LINE	L1	3.90689059560852	5	-1.09310940439148	0.0253420407956794	down
chr2	143426803	143433669	6867	chr2_143426803_143433669	L1MdA_II	LINE/L1	LINE	L1	3.39231742277876	4.48112668973662	-1.08880926695786	0.0364990660751323	down
chr13	67914347	67923146	8800	chr13_67914347_67923146	RLTR6-int	LTR/ERV1	LTR	ERV1	3.52356195605701	4.60486205815886	-1.08130010210185	0.0291617421307513	down
chr7	83179754	83186375	6622	chr7_83179754_83186375	L1MdTf_I	LINE/L1	LINE	L1	3.52356195605701	4.60486205815886	-1.08130010210185	0.0215858921576399	down
chrX	107330419	107336636	6218	chrX_107330419_107336636	L1MdTf_II	LINE/L1	LINE	L1	3.52356195605701	4.60486205815886	-1.08130010210185	0.0248033585229556	down
chr13	51985482	51990744	5263	chr13_51985482_51990744	IAPEz-int	LTR/ERVK	LTR	ERVK	3.58496250072116	4.66296501272243	-1.07800251200127	0.0255438126949234	down
chr13	63218001	63223147	5147	chr13_63218001_63223147	IAPEz-int	LTR/ERVK	LTR	ERVK	3.58496250072116	4.66296501272243	-1.07800251200127	0.025229582948638	down
chr6	106397390	106403943	6554	chr6_106397390_106403943	L1MdGf_I	LINE/L1	LINE	L1	3.16992500144231	4.24792751344359	-1.07800251200127	0.0496025918391435	down
chr12	56578323	56584701	6379	chr12_56578323_56584701	L1MdA_III	LINE/L1	LINE	L1	3.24792751344359	4.32192809488736	-1.07400058144378	0.0480681780450172	down
chr13	21329787	21336101	6315	chr13_21329787_21336101	L1MdTf_III	LINE/L1	LINE	L1	3.24792751344359	4.32192809488736	-1.07400058144378	0.0410490224818011	down
chr4	18710393	18716625	6233	chr4_18710393_18716625	L1MdGf_I	LINE/L1	LINE	L1	3.24792751344359	4.32192809488736	-1.07400058144378	0.0384337012929072	down
chrX	64883710	64890488	6779	chrX_64883710_64890488	L1MdTf_II	LINE/L1	LINE	L1	4.24792751344359	5.32192809488736	-1.07400058144378	0.00455632597515331	down
chrX	76893922	76902750	8829	chrX_76893922_76902750	RLTR6-int	LTR/ERV1	LTR	ERV1	3.70043971814109	4.77258950389693	-1.07214978575584	0.0195823942762767	down
chr1	142494397	142500767	6371	chr1_142494397_142500767	L1MdA_I	LINE/L1	LINE	L1	3.70043971814109	4.77258950389693	-1.07214978575584	0.022000784546386	down
chr3	140120010	140125294	5285	chr3_140120010_140125294	IAPEz-int	LTR/ERVK	LTR	ERVK	3.32192809488736	4.39231742277876	-1.0703893278914	0.0404383312290739	down
chr12	48514474	48520708	6235	chr12_48514474_48520708	L1MdA_II	LINE/L1	LINE	L1	3.39231742277876	4.4594316186373	-1.06711419585854	0.0334509928013789	down
chr15	11224410	11231072	6663	chr15_11224410_11231072	L1MdGf_I	LINE/L1	LINE	L1	3.8073549220576	4.87446911791614	-1.06711419585854	0.0166664859421866	down
chr18	17820858	17827578	6721	chr18_17820858_17827578	L1MdGf_I	LINE/L1	LINE	L1	3.85798099512757	4.92283213947754	-1.06485114434997	0.0124302583331243	down
chrX	114750151	114757033	6883	chrX_114750151_114757033	L1MdTf_III	LINE/L1	LINE	L1	3.85798099512757	4.92283213947754	-1.06485114434997	0.0290738166655596	down
chr16	62198400	62204774	6375	chr16_62198400_62204774	L1MdA_I	LINE/L1	LINE	L1	3.4594316186373	4.52356195605701	-1.06413033741972	0.0356189800749233	down
chrX	166416479	166422713	6235	chrX_166416479_166422713	L1MdA_II	LINE/L1	LINE	L1	3.4594316186373	4.52356195605701	-1.06413033741972	0.0358633853354204	down
chr1	17956736	17963924	7189	chr1_17956736_17963924	IAPEz-int	LTR/ERVK	LTR	ERVK	3.90689059560852	4.96962635095648	-1.06273575534796	0.0155205589972823	down
chr14	70727856	70734539	6684	chr14_70727856_70734539	L1MdGf_I	LINE/L1	LINE	L1	3.95419631038688	5.01495034146597	-1.0607540310791	0.016537773714218	down
chr7	17659161	17667986	8826	chr7_17659161_17667986	RLTR6-int	LTR/ERV1	LTR	ERV1	3.58496250072116	4.64385618977472	-1.05889368905357	0.0368398476754892	down
chr19	20520730	20527048	6319	chr19_20520730_20527048	L1MdGf_I	LINE/L1	LINE	L1	3.58496250072116	4.64385618977472	-1.05889368905357	0.0378697144533269	down
chr14	54129686	54136365	6680	chr14_54129686_54136365	L1MdGf_I	LINE/L1	LINE	L1	3.64385618977472	4.70043971814109	-1.05658352836637	0.028392997509995	down
chr14	100795149	100802198	7050	chr14_100795149_100802198	L1MdTf_II	LINE/L1	LINE	L1	4.08746284125034	5.14295795384204	-1.0554951125917	0.00828305932266528	down
chr17	38267794	38272604	4811	chr17_38267794_38272604	IAPEz-int	LTR/ERVK	LTR	ERVK	3.24792751344359	4.29768054864069	-1.0497530351971	0.0409270874034658	down
chr4	93951665	93956841	5177	chr4_93951665_93956841	IAPEz-int	LTR/ERVK	LTR	ERVK	3.39231742277876	4.4374053123073	-1.04508788952854	0.0403583527228138	down
chr14	72520274	72526650	6377	chr14_72520274_72526650	L1MdTf_III	LINE/L1	LINE	L1	3.4594316186373	4.50250034052918	-1.04306872189189	0.0308819282899198	down
chr14	15503638	15510025	6388	chr14_15503638_15510025	L1MdTf_III	LINE/L1	LINE	L1	3.52356195605701	4.56478461878353	-1.04122266272651	0.0372886672460281	down
chr6	101755374	101761939	6566	chr6_101755374_101761939	L1MdTf_III	LINE/L1	LINE	L1	3.58496250072116	4.62449086490779	-1.03952836418664	0.042512736300883	down
chr9	36394071	36400509	6439	chr9_36394071_36400509	L1MdTf_III	LINE/L1	LINE	L1	3.58496250072116	4.62449086490779	-1.03952836418664	0.0322355917069908	down
chr5	105022094	105028508	6415	chr5_105022094_105028508	L1MdTf_I	LINE/L1	LINE	L1	3.64385618977472	4.68182403997374	-1.03796785019902	0.0218105809133089	down
chr6	4363022	4368317	5296	chr6_4363022_4368317	IAPEz-int	LTR/ERVK	LTR	ERVK	3.70043971814109	4.73696559416621	-1.03652587602511	0.033333406975845	down
chr12	11031437	11037976	6540	chr12_11031437_11037976	L1MdGf_I	LINE/L1	LINE	L1	3.75488750216347	4.79007693062577	-1.0351894284623	0.0377933966044312	down
chrX	37909704	37916352	6649	chrX_37909704_37916352	L1MdTf_II	LINE/L1	LINE	L1	3.75488750216347	4.79007693062577	-1.0351894284623	0.0174298018580235	down
chr12	8403176	8408459	5284	chr12_8403176_8408459	IAPEz-int	LTR/ERVK	LTR	ERVK	3.90689059560852	4.93859945533586	-1.03170885972734	0.0148788420993582	down
chrX	72679184	72685694	6511	chrX_72679184_72685694	L1MdTf_I	LINE/L1	LINE	L1	3.90689059560852	4.93859945533586	-1.03170885972734	0.019098974438465	down
chr6	13496508	13502709	6202	chr6_13496508_13502709	L1MdTf_II	LINE/L1	LINE	L1	3.32192809488736	4.34577483684173	-1.02384674195437	0.0477769321050305	down
chr6	68355808	68362659	6852	chr6_68355808_68362659	L1MdTf_I	LINE/L1	LINE	L1	3.4594316186373	4.48112668973662	-1.02169507109932	0.0488100686799895	down
chr2	55492248	55498331	6084	chr2_55492248_55498331	L1MdTf_II	LINE/L1	LINE	L1	3.58496250072116	4.60486205815886	-1.0198995574377	0.0328067975897552	down
chr5	77770388	77774901	4514	chr5_77770388_77774901	IAPEz-int	LTR/ERVK	LTR	ERVK	3.64385618977472	4.66296501272243	-1.0191088229477	0.0236419907377089	down
chr6	3814754	3820898	6145	chr6_3814754_3820898	L1MdTf_I	LINE/L1	LINE	L1	3.64385618977472	4.66296501272243	-1.0191088229477	0.0265457683227523	down
chr11	45095956	45102023	6068	chr11_45095956_45102023	L1MdTf_I	LINE/L1	LINE	L1	3.75488750216347	4.77258950389693	-1.01770200173346	0.0294266350478605	down
chr1	178058028	178065126	7099	chr1_178058028_178065126	IAPEz-int	LTR/ERVK	LTR	ERVK	4.28540221886225	5.29768054864069	-1.01227832977844	0.0233513956612156	down
chrX	15474745	15482331	7587	chrX_15474745_15482331	RLTR4_MM-int	LTR/ERV1	LTR	ERV1	3.95419631038688	4.95419631038687	-1	0.0159809439043755	down
chr8	72925806	72931623	5818	chr8_72925806_72931623	IAPEz-int	LTR/ERVK	LTR	ERVK	3.58496250072116	4.58496250072116	-1	0.0360233181097464	down
chr9	12021297	12027076	5780	chr9_12021297_12027076	IAPEz-int	LTR/ERVK	LTR	ERVK	3.52356195605701	4.52356195605701	-1	0.0361149547043533	down
chr5	145539421	145545851	6431	chr5_145539421_145545851	MERVL-int	LTR/ERVL	LTR	ERVL	3.85798099512757	4.85798099512757	-1	0.0389188342146255	down
chr1	103147776	103154418	6643	chr1_103147776_103154418	L1MdTf_II	LINE/L1	LINE	L1	3.64385618977472	4.64385618977472	-1	0.0364795005441391	down
chr1	144458241	144464379	6139	chr1_144458241_144464379	L1MdA_I	LINE/L1	LINE	L1	3.95419631038688	4.95419631038687	-1	0.0171001749778637	down
chr11	56732333	56738781	6449	chr11_56732333_56738781	L1MdTf_III	LINE/L1	LINE	L1	4	5	-1	0.0193446150922511	down
chr17	11493532	11500411	6880	chr17_11493532_11500411	L1MdTf_II	LINE/L1	LINE	L1	3.90689059560852	4.90689059560852	-1	0.0280439545834012	down
chr17	18737680	18744022	6343	chr17_18737680_18744022	L1MdA_II	LINE/L1	LINE	L1	3.4594316186373	4.4594316186373	-1	0.0451395529066637	down
chr19	32033390	32039715	6326	chr19_32033390_32039715	L1MdGf_I	LINE/L1	LINE	L1	3.75488750216347	4.75488750216347	-1	0.0235962266179441	down
chr3	31701369	31707549	6181	chr3_31701369_31707549	L1MdTf_II	LINE/L1	LINE	L1	3.58496250072116	4.58496250072116	-1	0.0320555257913089	down
chr4	82187246	82193666	6421	chr4_82187246_82193666	L1MdTf_I	LINE/L1	LINE	L1	3.90689059560852	4.90689059560852	-1	0.0271619988924745	down
chr5	41566173	41572716	6544	chr5_41566173_41572716	L1MdGf_I	LINE/L1	LINE	L1	3.4594316186373	4.4594316186373	-1	0.0385274264319751	down
chr8	65403388	65410231	6844	chr8_65403388_65410231	L1MdTf_II	LINE/L1	LINE	L1	3.90689059560852	4.90689059560852	-1	0.018223248973218	down
chr9	9538721	9545352	6632	chr9_9538721_9545352	L1MdTf_II	LINE/L1	LINE	L1	3.90689059560852	4.90689059560852	-1	0.0213812991409005	down
chr5	132118973	132125858	6886	chr5_132118973_132125858	L1MdGf_I	LINE/L1	LINE	L1	4.28540221886225	5.27301849440642	-0.987616275544167	0.0175789475615116	down
chr1	103031666	103038793	7128	chr1_103031666_103038793	IAPEz-int	LTR/ERVK	LTR	ERVK	4.04439411935845	5.02974734339405	-0.985353224035599	0.014232534674191	down
chrX	169285196	169291880	6685	chrX_169285196_169291880	L1MdGf_I	LINE/L1	LINE	L1	3.85798099512757	4.84130225398094	-0.98332125885337	0.0262251112847135	down
chr8	103754922	103761341	6420	chr8_103754922_103761341	L1MdTf_II	LINE/L1	LINE	L1	3.58496250072116	4.56478461878353	-0.97982211806237	0.0467038558197659	down
chr17	18380974	18389629	8656	chr17_18380974_18389629	RLTR6-int	LTR/ERV1	LTR	ERV1	3.52356195605701	4.50250034052918	-0.97893838447217	0.0445158983222141	down
chr13	33862034	33869119	7086	chr13_33862034_33869119	IAPEz-int	LTR/ERVK	LTR	ERVK	4.49185309632967	5.47031993478003	-0.978466838450359	0.00837759230416441	down
chr15	52837590	52845318	7729	chr15_52837590_52845318	L1MdTf_II	LINE/L1	LINE	L1	4.12928301694497	5.10153802646206	-0.972255009517096	0.0157650955582929	down
chr9	40898584	40904956	6373	chr9_40898584_40904956	L1MdA_I	LINE/L1	LINE	L1	3.95419631038688	4.92283213947754	-0.968635829090665	0.0197305152111668	down
chrX	152963078	152967974	4897	chrX_152963078_152967974	IAPEz-int	LTR/ERVK	LTR	ERVK	3.90689059560852	4.87446911791614	-0.967578522307623	0.0267023037762803	down
chr14	34383855	34389143	5289	chr14_34383855_34389143	IAPEz-int	LTR/ERVK	LTR	ERVK	3.85798099512757	4.82442843541655	-0.966447440288973	0.032365957965057	down
chr2	78504889	78511028	6140	chr2_78504889_78511028	L1MdTf_I	LINE/L1	LINE	L1	3.85798099512757	4.82442843541655	-0.966447440288973	0.0294925111866276	down
chr13	5063892	5070681	6790	chr13_5063892_5070681	L1MdA_I	LINE/L1	LINE	L1	3.8073549220576	4.77258950389693	-0.965234581839324	0.0316981271385683	down
chr2	56940473	56946880	6408	chr2_56940473_56946880	L1MdA_II	LINE/L1	LINE	L1	3.75488750216347	4.71881824745595	-0.963930745292478	0.0315984167420184	down
chr4	156139969	156146703	6735	chr4_156139969_156146703	IAPEz-int	LTR/ERVK	LTR	ERVK	4.32192809488736	5.28540221886225	-0.963474123974886	0.0150736640086948	down
chr13	77670708	77675212	4505	chr13_77670708_77675212	IAPEz-int	LTR/ERVK	LTR	ERVK	3.70043971814109	4.66296501272243	-0.962525294581337	0.0306078135292983	down
chrX	79711710	79718227	6518	chrX_79711710_79718227	L1MdTf_III	LINE/L1	LINE	L1	3.70043971814109	4.66296501272243	-0.962525294581337	0.0390827764803799	down
chr5	10621382	10630039	8658	chr5_10621382_10630039	RLTR6-int	LTR/ERV1	LTR	ERV1	3.64385618977472	4.60486205815886	-0.961005868384136	0.035920612310495	down
chr15	4413949	4420788	6840	chr15_4413949_4420788	L1MdTf_II	LINE/L1	LINE	L1	3.64385618977472	4.60486205815886	-0.961005868384136	0.0383680677272058	down
chr17	21544693	21551712	7020	chr17_21544693_21551712	L1MdTf_I	LINE/L1	LINE	L1	4.12928301694497	5.08746284125034	-0.958179824305373	0.0153543774130198	down
chr7	51419088	51424485	5398	chr7_51419088_51424485	IAPEz-int	LTR/ERVK	LTR	ERVK	3.95419631038688	4.90689059560852	-0.952694285221643	0.0214844530468482	down
chr8	75689471	75696510	7040	chr8_75689471_75696510	L1MdA_II	LINE/L1	LINE	L1	3.8073549220576	4.75488750216347	-0.947532580105864	0.0492400092055089	down
chr17	75424140	75430849	6710	chr17_75424140_75430849	L1MdTf_II	LINE/L1	LINE	L1	4.16992500144231	5.11547721741994	-0.945552215977624	0.0381057314643837	down
chr9	38240729	38247571	6843	chr9_38240729_38247571	L1MdTf_I	LINE/L1	LINE	L1	4.12928301694497	5.07324898203064	-0.943965965085672	0.0492044296733656	down
chr1	130199651	130205868	6218	chr1_130199651_130205868	L1MdA_II	LINE/L1	LINE	L1	3.70043971814109	4.64385618977472	-0.943416471633632	0.0425416263679544	down
chr4	98642590	98649147	6558	chr4_98642590_98649147	L1MdGf_I	LINE/L1	LINE	L1	3.70043971814109	4.64385618977472	-0.943416471633632	0.0373852811060029	down
chr5	4937516	4943950	6435	chr5_4937516_4943950	L1MdTf_III	LINE/L1	LINE	L1	3.64385618977472	4.58496250072116	-0.941106310946431	0.045857547010336	down
chr3	147218995	147225426	6432	chr3_147218995_147225426	L1MdTf_I	LINE/L1	LINE	L1	4	4.93859945533586	-0.938599455335857	0.023560649266447	down
chr5	72069673	72076768	7096	chr5_72069673_72076768	IAPEz-int	LTR/ERVK	LTR	ERVK	4.55458885167764	5.49185309632967	-0.937264244652037	0.0130648097544944	down
chr7	32270466	32277037	6572	chr7_32270466_32277037	L1MdTf_I	LINE/L1	LINE	L1	3.95419631038688	4.89077093024524	-0.936574619858366	0.0410192721602284	down
chr16	34018740	34025903	7164	chr16_34018740_34025903	IAPEz-int	LTR/ERVK	LTR	ERVK	4.20945336562895	5.14295795384204	-0.933504588213093	0.0290804179607365	down
chr7	30385301	30392433	7133	chr7_30385301_30392433	IAPEz-int	LTR/ERVK	LTR	ERVK	4.20945336562895	5.14295795384204	-0.933504588213093	0.0212111234777844	down
chr6	25105130	25111797	6668	chr6_25105130_25111797	L1MdTf_I	LINE/L1	LINE	L1	3.85798099512757	4.79007693062577	-0.932095935498196	0.0391626208111176	down
chr15	60347702	60354351	6650	chr15_60347702_60354351	L1MdTf_I	LINE/L1	LINE	L1	4.16992500144231	5.10153802646206	-0.93161302501975	0.0183708771747128	down
chr4	108146732	108154273	7542	chr4_108146732_108154273	RLTR4_MM-int	LTR/ERV1	LTR	ERV1	4.12928301694497	5.05889368905357	-0.929610672108602	0.0188832794950351	down
chr12	59440358	59447485	7128	chr12_59440358_59447485	IAPEz-int	LTR/ERVK	LTR	ERVK	4.39231742277876	5.32192809488736	-0.929610672108602	0.0175087190560341	down
chr8	72863112	72871953	8842	chr8_72863112_72871953	RLTR6-int	LTR/ERV1	LTR	ERV1	3.75488750216347	4.68182403997374	-0.926936537810276	0.040488742795272	down
chrX	95693303	95699702	6400	chrX_95693303_95699702	L1MdTf_II	LINE/L1	LINE	L1	3.75488750216347	4.68182403997374	-0.926936537810276	0.037692829315459	down
chr7	83266062	83273235	7174	chr7_83266062_83273235	IAPEz-int	LTR/ERVK	LTR	ERVK	4.55458885167764	5.48112668973662	-0.926537838058978	0.0231553705007223	down
chr1	127891985	127897254	5270	chr1_127891985_127897254	IAPEz-int	LTR/ERVK	LTR	ERVK	3.70043971814109	4.62449086490779	-0.924051146766702	0.0442126842642817	down
chr13	11501098	11508145	7048	chr13_11501098_11508145	IAPEz-int	LTR/ERVK	LTR	ERVK	4.55458885167764	5.47031993478003	-0.915731083102396	0.0141851445927526	down
chr1	182257817	182265403	7587	chr1_182257817_182265403	RLTR4_MM-int	LTR/ERV1	LTR	ERV1	3.85798099512757	4.77258950389693	-0.914608508769355	0.0379248562970954	down
chr1	45734076	45739352	5277	chr1_45734076_45739352	IAPEz-int	LTR/ERVK	LTR	ERVK	3.8073549220576	4.71881824745595	-0.911463325398343	0.0425596563378284	down
chrX	54227201	54232630	5430	chrX_54227201_54232630	IAPEz-int	LTR/ERVK	LTR	ERVK	4.04439411935845	4.95419631038687	-0.909802191028422	0.0413468630904805	down
chr1	63797700	63804378	6679	chr1_63797700_63804378	L1MdGf_I	LINE/L1	LINE	L1	3.75488750216347	4.66296501272243	-0.90807751055896	0.0469819730584174	down
chr5	144670536	144678122	7587	chr5_144670536_144678122	RLTR4_MM-int	LTR/ERV1	LTR	ERV1	4	4.90689059560852	-0.906890595608519	0.0282877708198444	down
chr8	74349677	74356760	7084	chr8_74349677_74356760	IAPEz-int	LTR/ERVK	LTR	ERVK	4.20945336562895	5.11547721741994	-0.906023851790986	0.029804815727264	down
chr11	29438717	29445137	6421	chr11_29438717_29445137	L1MdTf_I	LINE/L1	LINE	L1	3.70043971814109	4.60486205815886	-0.904422340017768	0.0460068869148119	down
chr18	33044080	33050524	6445	chr18_33044080_33050524	L1MdTf_I	LINE/L1	LINE	L1	3.90689059560852	4.8073549220576	-0.900464326449085	0.0374003442833553	down
chr5	71525752	71532416	6665	chr5_71525752_71532416	L1MdGf_I	LINE/L1	LINE	L1	4.20945336562895	5.10153802646206	-0.892084660833112	0.0356032672987002	down
chr1	104289578	104294815	5238	chr1_104289578_104294815	IAPEz-int	LTR/ERVK	LTR	ERVK	3.95419631038688	4.84130225398094	-0.887105943594066	0.0392384028045691	down
chr13	89157269	89164034	6766	chr13_89157269_89164034	L1MdA_I	LINE/L1	LINE	L1	4.12928301694497	5.01495034146597	-0.885667324521005	0.0261812077802251	down
chrX	91816978	91824111	7134	chrX_91816978_91824111	IAPEz-int	LTR/ERVK	LTR	ERVK	4.4262647547021	5.30985526258679	-0.88359050788469	0.0159571216745289	down
chr14	113288096	113293380	5285	chr14_113288096_113293380	IAPEz-int	LTR/ERVK	LTR	ERVK	3.90689059560852	4.79007693062577	-0.88318633501725	0.0457949464440911	down
chr4	119648305	119652924	4620	chr4_119648305_119652924	IAPEz-int	LTR/ERVK	LTR	ERVK	3.90689059560852	4.79007693062577	-0.88318633501725	0.0496324188644855	down
chr1	64178203	64185287	7085	chr1_64178203_64185287	IAPEz-int	LTR/ERVK	LTR	ERVK	4.4594316186373	5.33390073655344	-0.874469117916141	0.0257857041340468	down
chr7	58588691	58595356	6666	chr7_58588691_58595356	L1MdGf_I	LINE/L1	LINE	L1	4	4.87446911791614	-0.874469117916141	0.0376857610389875	down
chr4	62443809	62449494	5686	chr4_62443809_62449494	IAPEz-int	LTR/ERVK	LTR	ERVK	4.12928301694497	5	-0.870716983055034	0.0307787719415265	down
chr1	62534043	62541294	7252	chr1_62534043_62541294	IAPEz-int	LTR/ERVK	LTR	ERVK	4.39231742277876	5.26052755022322	-0.868210127444458	0.0232829102260171	down
chrX	21254683	21261772	7090	chrX_21254683_21261772	L1MdGf_I	LINE/L1	LINE	L1	4.39231742277876	5.26052755022322	-0.868210127444458	0.0235818997721779	down
chr1	149506292	149513454	7163	chr1_149506292_149513454	IAPEz-int	LTR/ERVK	LTR	ERVK	4.24792751344359	5.11547721741994	-0.86754970397635	0.0292832160508752	down
chrX	113910391	113915583	5193	chrX_113910391_113915583	IAPEz-int	LTR/ERVK	LTR	ERVK	3.90689059560852	4.77258950389693	-0.865698908288409	0.0411912046347061	down
chr3	17727824	17735325	7502	chr3_17727824_17735325	L1MdGf_I	LINE/L1	LINE	L1	4.78135971352466	5.64385618977472	-0.862496476250064	0.043564945238894	down
chrX	87077862	87084715	6854	chrX_87077862_87084715	L1MdTf_II	LINE/L1	LINE	L1	4	4.85798099512757	-0.857980995127572	0.0421781331346345	down
chr8	113280368	113287533	7166	chr8_113280368_113287533	IAPEz-int	LTR/ERVK	LTR	ERVK	4.78135971352466	5.63420601974101	-0.852846306216345	0.0113167004920239	down
chr14	35432409	35439690	7282	chr14_35432409_35439690	L1MdGf_I	LINE/L1	LINE	L1	4.58496250072116	5.4374053123073	-0.852442811586142	0.0374391423163477	down
chr8	43005805	43012393	6589	chr8_43005805_43012393	L1MdA_I	LINE/L1	LINE	L1	4.58496250072116	5.4374053123073	-0.852442811586142	0.0220924997475071	down
chr13	87348935	87354117	5183	chr13_87348935_87354117	IAPEz-int	LTR/ERVK	LTR	ERVK	4.20945336562895	5.05889368905357	-0.849440323424618	0.0344111468778002	down
chr14	105207638	105214265	6628	chr14_105207638_105214265	IAPEz-int	LTR/ERVK	LTR	ERVK	4.55458885167764	5.40372218605101	-0.849133334373372	0.0223500989323036	down
chr6	23364890	23371298	6409	chr6_23364890_23371298	L1MdTf_II	LINE/L1	LINE	L1	4	4.84130225398094	-0.841302253980942	0.0478057239441606	down
chr16	56934168	56940959	6792	chr16_56934168_56940959	L1MdGf_I	LINE/L1	LINE	L1	4.24792751344359	5.08746284125034	-0.839535327806754	0.0453215925785004	down
chrX	121550119	121557363	7245	chrX_121550119_121557363	IAPEz-int	LTR/ERVK	LTR	ERVK	4.32192809488736	5.15650448567999	-0.834576390792628	0.0364997566641675	down
chr13	32947567	32954678	7112	chr13_32947567_32954678	IAPEz-int	LTR/ERVK	LTR	ERVK	4.4262647547021	5.26052755022322	-0.834262795521121	0.0229199317453206	down
chr8	25871456	25878540	7085	chr8_25871456_25878540	IAPEz-int	LTR/ERVK	LTR	ERVK	4.61470984411521	5.44846050081629	-0.833750656701086	0.0385749701780768	down
chr8	109739055	109746202	7148	chr8_109739055_109746202	IAPEz-int	LTR/ERVK	LTR	ERVK	4.8073549220576	5.63420601974101	-0.826851097683401	0.0131965693336908	down
chr17	9780579	9787687	7109	chr17_9780579_9787687	IAPEz-int	LTR/ERVK	LTR	ERVK	4.64385618977472	5.47031993478003	-0.826463745005309	0.0215762466561427	down
chr4	55861438	55867649	6212	chr4_55861438_55867649	L1MdTf_I	LINE/L1	LINE	L1	4.24792751344359	5.07324898203064	-0.825321468587053	0.0425254487581433	down
chrX	155849218	155856288	7071	chrX_155849218_155856288	IAPEz-int	LTR/ERVK	LTR	ERVK	4.61470984411521	5.4374053123073	-0.82269546819209	0.0188134630886907	down
chr11	40413470	40420523	7054	chr11_40413470_40420523	L1MdTf_II	LINE/L1	LINE	L1	4.32192809488736	5.14295795384204	-0.82102985895468	0.0342753498349856	down
chr18	33029750	33036476	6727	chr18_33029750_33036476	L1MdGf_I	LINE/L1	LINE	L1	4.39231742277876	5.20945336562895	-0.817135942850189	0.038916460849618	down
chr4	4883514	4890685	7172	chr4_4883514_4890685	IAPEz-int	LTR/ERVK	LTR	ERVK	4.7279204545632	5.54432051622381	-0.816400061660612	0.0176842806734218	down
chr13	115965192	115972288	7097	chr13_115965192_115972288	IAPEz-int	LTR/ERVK	LTR	ERVK	4.85798099512757	5.6724253419715	-0.814444346843923	0.0182040075024826	down
chr7	77212663	77219752	7090	chr7_77212663_77219752	IAPEz-int	LTR/ERVK	LTR	ERVK	4.4594316186373	5.27301849440642	-0.813586875769118	0.0318190780932147	down
chrX	88991668	88998319	6652	chrX_88991668_88998319	L1MdTf_II	LINE/L1	LINE	L1	4.12928301694497	4.93859945533586	-0.809316438390891	0.0425305129154566	down
chr5	64557961	64565062	7102	chr5_64557961_64565062	IAPEz-int	LTR/ERVK	LTR	ERVK	4.4262647547021	5.23521646169403	-0.808951706991934	0.0362395504313488	down
chrX	12231401	12238542	7142	chrX_12231401_12238542	IAPEz-int	LTR/ERVK	LTR	ERVK	4.4262647547021	5.23521646169403	-0.808951706991934	0.0301656965146136	down
chrX	72941953	72949106	7154	chrX_72941953_72949106	IAPEz-int	LTR/ERVK	LTR	ERVK	4.4262647547021	5.23521646169403	-0.808951706991934	0.046802026856414	down
chr7	127618673	127626128	7456	chr7_127618673_127626128	IAPEz-int	LTR/ERVK	LTR	ERVK	4.64385618977472	5.44846050081629	-0.80460431104157	0.043171382566976	down
chr18	50782872	50789530	6659	chr18_50782872_50789530	L1MdTf_II	LINE/L1	LINE	L1	4.28540221886225	5.08746284125034	-0.80206062238809	0.0477536624563243	down
chr1	16738274	16745324	7051	chr1_16738274_16745324	IAPEz-int	LTR/ERVK	LTR	ERVK	4.52356195605701	5.32192809488736	-0.79836613883035	0.0325722730479288	down
chrX	47435908	47443189	7282	chrX_47435908_47443189	L1MdGf_I	LINE/L1	LINE	L1	4.6724253419715	5.47031993478003	-0.797894592808539	0.0236514952364266	down
chr17	38536344	38542934	6591	chr17_38536344_38542934	IAPEz-int	LTR/ERVK	LTR	ERVK	4.4262647547021	5.22239242133645	-0.79612766663435	0.0395178923001886	down
chr5	43828841	43836087	7247	chr5_43828841_43836087	IAPEz-int	LTR/ERVK	LTR	ERVK	4.4262647547021	5.22239242133645	-0.79612766663435	0.0292423799222039	down
chr13	39506928	39513512	6585	chr13_39506928_39513512	IAPEz-int	LTR/ERVK	LTR	ERVK	4.4594316186373	5.24792751344359	-0.788495894806288	0.0349850795101231	down
chr9	93911046	93918115	7070	chr9_93911046_93918115	L1MdGf_I	LINE/L1	LINE	L1	4.58496250072116	5.36923380966572	-0.784271308944563	0.0362031870646601	down
chr14	117178977	117185572	6596	chr14_117178977_117185572	IAPEz-int	LTR/ERVK	LTR	ERVK	4.64385618977472	5.4262647547021	-0.782408564927374	0.0328613435408763	down
chr3	74834334	74840969	6636	chr3_74834334_74840969	IAPEz-int	LTR/ERVK	LTR	ERVK	4.32192809488736	5.10153802646206	-0.7796099315747	0.0466669466396123	down
chr2	113809942	113817006	7065	chr2_113809942_113817006	IAPEz-int	LTR/ERVK	LTR	ERVK	4.55458885167764	5.33390073655344	-0.779311884875801	0.0416248434889776	down
chr8	63739451	63746552	7102	chr8_63739451_63746552	IAPEz-int	LTR/ERVK	LTR	ERVK	4.7279204545632	5.50250034052918	-0.774579885965984	0.025038704956812	down
chr13	109851692	109858852	7161	chr13_109851692_109858852	IAPEz-int	LTR/ERVK	LTR	ERVK	4.78135971352466	5.55458885167764	-0.773229138152978	0.0374259802032844	down
chr13	43386794	43393876	7083	chr13_43386794_43393876	IAPEz-int	LTR/ERVK	LTR	ERVK	4.78135971352466	5.55458885167764	-0.773229138152978	0.0288989613581461	down
chr5	16667435	16674743	7309	chr5_16667435_16674743	IAPEz-int	LTR/ERVK	LTR	ERVK	4.64385618977472	5.41503749927884	-0.77118130950412	0.0304495327889754	down
chr13	94735496	94742631	7136	chr13_94735496_94742631	IAPEz-int	LTR/ERVK	LTR	ERVK	4.75488750216347	5.52356195605701	-0.768674453893545	0.0361989441972043	down
chr13	87063878	87071060	7183	chr13_87063878_87071060	IAPEz-int	LTR/ERVK	LTR	ERVK	4.61470984411521	5.38082178394093	-0.766111939825723	0.0288679553218659	down
chr5	42280226	42286250	6025	chr5_42280226_42286250	IAPEz-int	LTR/ERVK	LTR	ERVK	4.39231742277876	5.15650448567999	-0.76418706290123	0.0413230194064469	down
chr18	89910529	89918199	7671	chr18_89910529_89918199	L1MdA_I	LINE/L1	LINE	L1	4.4594316186373	5.22239242133645	-0.76296080269915	0.0386849009819851	down
chrX	121439088	121446219	7132	chrX_121439088_121446219	IAPEz-int	LTR/ERVK	LTR	ERVK	4.4262647547021	5.18322182405577	-0.756957069353672	0.04798143434418	down
chr6	108265886	108273221	7336	chr6_108265886_108273221	L1MdGf_I	LINE/L1	LINE	L1	4.55458885167764	5.30985526258679	-0.75526641090915	0.0405899366850766	down
chrX	143172942	143179331	6390	chrX_143172942_143179331	IAPEz-int	LTR/ERVK	LTR	ERVK	4.52356195605701	5.27301849440642	-0.749456538349403	0.039281599302251	down
chr7	89818794	89825993	7200	chr7_89818794_89825993	IAPEz-int	LTR/ERVK	LTR	ERVK	4.8073549220576	5.55458885167764	-0.747233929620034	0.0413028419163451	down
chr14	68675960	68683040	7081	chr14_68675960_68683040	IAPEz-int	LTR/ERVK	LTR	ERVK	4.85798099512757	5.60486205815886	-0.746881063031289	0.0402695013468036	down
chr13	81890978	81898059	7082	chr13_81890978_81898059	IAPEz-int	LTR/ERVK	LTR	ERVK	4.6724253419715	5.41503749927884	-0.742612157307349	0.0353636516518036	down
chr8	45922703	45929808	7106	chr8_45922703_45929808	IAPEz-int	LTR/ERVK	LTR	ERVK	4.70043971814109	5.4374053123073	-0.736965594166207	0.0374748370205039	down
chr12	31358158	31365225	7068	chr12_31358158_31365225	IAPEz-int	LTR/ERVK	LTR	ERVK	4.75488750216347	5.44846050081629	-0.693572998652826	0.0429497023246515	down
chr4	38870095	38877194	7100	chr4_38870095_38877194	IAPEz-int	LTR/ERVK	LTR	ERVK	4.75488750216347	5.44846050081629	-0.693572998652826	0.0411664227115155	down
chr6	128904551	128911817	7267	chr6_128904551_128911817	IAPEz-int	LTR/ERVK	LTR	ERVK	4.8073549220576	5.49185309632967	-0.684498174272071	0.0429096942758103	down
chrX	123561030	123568101	7072	chrX_123561030_123568101	IAPEz-int	LTR/ERVK	LTR	ERVK	4.88264304936184	5.53397857200235	-0.65133552264051	0.0498993988588813	down
chr17	3822790	3828962	6173	chr17_3822790_3828962	L1MdA_II	LINE/L1	LINE	L1	4.52356195605701	3.54432051622381	0.979241439833203	0.0434994004090226	up
chrX	68362346	68363940	1595	chrX_68362346_68363940	Lx9	LINE/L1	LINE	L1	5.37503943134692	3.77258950389693	1.60244992745	0.048088596242122	up
chr2	9660854	9661333	480	chr2_9660854_9661333	B1_Mus2	SINE/Alu	SINE	Alu	4.28540221886225	2.66296501272243	1.62243720613982	0.0148916162058419	up
chr7	10284967	10285235	269	chr7_10284967_10285235	B1_Mus1	SINE/Alu	SINE	Alu	4.64385618977472	2.93859945533586	1.70525673443887	0.0356526633451276	up
chr1	82477573	82477630	58	chr1_82477573_82477630	RLTR20A4	LTR/ERVK	LTR	ERVK	4.49185309632967	2.73696559416621	1.75488750216347	0.0404925029016414	up
chr19	25811349	25812050	702	chr19_25811349_25812050	B4A	SINE/B4	SINE	B4	5.58496250072116	3.77258950389693	1.81237299682423	0.0000631916890175066	up
chr1	82477466	82477522	57	chr1_82477466_82477522	RLTR20A4	LTR/ERVK	LTR	ERVK	4.04439411935845	2.22239242133645	1.82200169802201	0.00990915978259976	up
chr7	29926721	29930449	3729	chr7_29926721_29930449	RLTR10-int	LTR/ERVK	LTR	ERVK	3.24792751344359	1.41503749927884	1.83289001416474	0.0395095458854112	up
chr13	73520431	73521767	1337	chr13_73520431_73521767	L1MCa	LINE/L1	LINE	L1	3.95419631038688	2.11547721741994	1.83871909296694	0.0110020498927274	up
chr13	61172855	61173661	807	chr13_61172855_61173661	B3	SINE/B2	SINE	B2	3.52356195605701	1.58496250072116	1.93859945533586	0.0165204181966521	up
chr6	14302253	14305152	2900	chr6_14302253_14305152	IAPEz-int	LTR/ERVK	LTR	ERVK	3	1	2	0.0492679474763377	up
chr19	34379572	34380564	993	chr19_34379572_34380564	L1MdTf_III	LINE/L1	LINE	L1	3.24792751344359	1.22239242133645	2.02553509210714	0.0313343786413396	up
chr2	66188784	66190441	1658	chr2_66188784_66190441	L1MC5	LINE/L1	LINE	L1	3.95419631038688	1.87446911791614	2.07972719247073	0.0203081703268159	up
chr15	59180611	59181634	1024	chr15_59180611_59181634	B1_Mur3	SINE/Alu	SINE	Alu	4.08746284125034	2	2.08746284125034	0.0197219228336318	up
chr17	65561118	65562914	1797	chr17_65561118_65562914	RCHARR1	DNA/hAT-Charlie	DNA	hAT-Charlie	3.52356195605701	1.41503749927884	2.10852445677817	0.0298669873279281	up
chr12	51739289	51739420	132	chr12_51739289_51739420	B1_Mm	SINE/Alu	SINE	Alu	2.16992500144231	0	2.16992500144231	0.0325143051160152	up
chr2	71468827	71469712	886	chr2_71468827_71469712	B1_Mus1	SINE/Alu	SINE	Alu	3.75488750216347	1.58496250072116	2.16992500144231	0.0163028711027331	up
chr10	19194393	19194581	189	chr10_19194393_19194581	B3	SINE/B2	SINE	B2	2.16992500144231	0	2.16992500144231	0.0387247619021018	up
chr13	76645875	76645886	12	chr13_76645875_76645886	B2_Mm2	SINE/B2	SINE	B2	2.16992500144231	0	2.16992500144231	0.0325143051160152	up
chr1	82477372	82477428	57	chr1_82477372_82477428	RLTR20A4	LTR/ERVK	LTR	ERVK	3.39231742277876	1.22239242133645	2.16992500144231	0.0274032198477831	up
chr10	75362217	75364100	1884	chr10_75362217_75364100	Lx9	LINE/L1	LINE	L1	3.75488750216347	1.58496250072116	2.16992500144231	0.00484140994353313	up
chr5	89598363	89599752	1390	chr5_89598363_89599752	Lx8b	LINE/L1	LINE	L1	2.16992500144231	0	2.16992500144231	0.0482483340190439	up
chr6	5354772	5358038	3267	chr6_5354772_5358038	Lx7	LINE/L1	LINE	L1	3.16992500144231	1	2.16992500144231	0.0268333047065804	up
chr9	117322763	117329070	6308	chr9_117322763_117329070	L1MdA_IV	LINE/L1	LINE	L1	3.24792751344359	1	2.24792751344359	0.0215159354689255	up
chr2	140880634	140881670	1037	chr2_140880634_140881670	L1MdA_I	LINE/L1	LINE	L1	3	0.736965594166206	2.26303440583379	0.0427696077542979	up
chr12	6699548	6703733	4186	chr12_6699548_6703733	IAP1-MM_I-int	LTR/ERVK	LTR	ERVK	3.52356195605701	1.22239242133645	2.30116953472056	0.0466893493332234	up
chr15	95852597	95852650	54	chr15_95852597_95852650	PB1D9	SINE/Alu	SINE	Alu	2.32192809488736	0	2.32192809488736	0.0424826209952428	up
chr5	132691341	132691479	139	chr5_132691341_132691479	RSINE1	SINE/B4	SINE	B4	2.32192809488736	0	2.32192809488736	0.0216631424456232	up
chr11	90379497	90379553	57	chr11_90379497_90379553	RLTR20A4	LTR/ERVK	LTR	ERVK	2.32192809488736	0	2.32192809488736	0.0216631424456232	up
chr13	50169148	50173714	4567	chr13_50169148_50173714	RLTR10-int	LTR/ERVK	LTR	ERVK	2.32192809488736	0	2.32192809488736	0.0396855291763311	up
chr7	65076836	65076892	57	chr7_65076836_65076892	RLTR20A4	LTR/ERVK	LTR	ERVK	2.32192809488736	0	2.32192809488736	0.0330109060425033	up
chr7	35705710	35705782	73	chr7_35705710_35705782	MER5A	DNA/hAT-Charlie	DNA	hAT-Charlie	2.32192809488736	0	2.32192809488736	0.048002927567381	up
chr16	81317229	81318244	1016	chr16_81317229_81318244	Lx9	LINE/L1	LINE	L1	2.32192809488736	0	2.32192809488736	0.0424826209952428	up
chr6	32225310	32225888	579	chr6_32225310_32225888	L1MB3	LINE/L1	LINE	L1	2.32192809488736	0	2.32192809488736	0.0330109060425033	up
chr15	31176692	31176963	272	chr15_31176692_31176963	UCON29	DNA/Kolobok	DNA	Kolobok	3.8073549220576	1.41503749927884	2.39231742277876	0.0164595889492626	up
chr13	62052851	62052993	143	chr13_62052851_62052993	B1_Mus2	SINE/Alu	SINE	Alu	2.4594316186373	0	2.4594316186373	0.0226961382351779	up
chr1	128469515	128469837	323	chr1_128469515_128469837	ID_B1	SINE/B4	SINE	B4	2.4594316186373	0	2.4594316186373	0.0226961382351779	up
chr1	17355175	17355340	166	chr1_17355175_17355340	B4A	SINE/B4	SINE	B4	2.4594316186373	0	2.4594316186373	0.0226961382351779	up
chr6	141830059	141830277	219	chr6_141830059_141830277	RSINE1	SINE/B4	SINE	B4	2.4594316186373	0	2.4594316186373	0.0226961382351779	up
chr6	85308521	85311069	2549	chr6_85308521_85311069	RCHARR1	DNA/hAT-Charlie	DNA	hAT-Charlie	2.4594316186373	0	2.4594316186373	0.0137097804200303	up
chr3	151789624	151790168	545	chr3_151789624_151790168	Lx7	LINE/L1	LINE	L1	2.4594316186373	0	2.4594316186373	0.0121668848860706	up
chr3	63224773	63225224	452	chr3_63224773_63225224	Lx8	LINE/L1	LINE	L1	2.4594316186373	0	2.4594316186373	0.0350766051010769	up
chr8	36357367	36358568	1202	chr8_36357367_36358568	L1MA4A	LINE/L1	LINE	L1	2.4594316186373	0	2.4594316186373	0.0121681903199852	up
chr10	115916716	115917077	362	chr10_115916716_115917077	B4	SINE/B4	SINE	B4	3.90689059560852	1.41503749927884	2.49185309632967	0.00956541186911158	up
chr14	59079298	59079605	308	chr14_59079298_59079605	B1_Mur1	SINE/Alu	SINE	Alu	3.24792751344359	0.736965594166206	2.51096191927738	0.0443859449642417	up
chr3	89835858	89837371	1514	chr3_89835858_89837371	Lx8	LINE/L1	LINE	L1	3.52356195605701	1	2.52356195605701	0.0351876133808517	up
chr19	15265600	15267149	1550	chr19_15265600_15267149	Lx8	LINE/L1	LINE	L1	4.28540221886225	1.73696559416621	2.54843662469604	0.0239574085498104	up
chr3	32539171	32539315	145	chr3_32539171_32539315	B1_Mur1	SINE/Alu	SINE	Alu	2.58496250072116	0	2.58496250072116	0.0383576300191877	up
chr18	15000266	15001268	1003	chr18_15000266_15001268	ID_B1	SINE/B4	SINE	B4	2.58496250072116	0	2.58496250072116	0.015725802381332	up
chr6	115041572	115041785	214	chr6_115041572_115041785	B4	SINE/B4	SINE	B4	2.58496250072116	0	2.58496250072116	0.0383448604088582	up
chr13	12137495	12137873	379	chr13_12137495_12137873	RLTR13A2	LTR/ERVK	LTR	ERVK	2.58496250072116	0	2.58496250072116	0.0183140005496088	up
chr18	47690392	47690477	86	chr18_47690392_47690477	RLTR31D_MM	LTR/ERVK	LTR	ERVK	2.58496250072116	0	2.58496250072116	0.0383576300191877	up
chr6	97680225	97680453	229	chr6_97680225_97680453	MLTR11B	LTR/ERVK	LTR	ERVK	2.58496250072116	0	2.58496250072116	0.0383448604088582	up
chr8	108098144	108098276	133	chr8_108098144_108098276	RLTR17B_Mm	LTR/ERVK	LTR	ERVK	2.58496250072116	0	2.58496250072116	0.0383448604088582	up
chr17	72664888	72665758	871	chr17_72664888_72665758	Charlie1a	DNA/hAT-Charlie	DNA	hAT-Charlie	2.58496250072116	0	2.58496250072116	0.0383576300191877	up
chr11	92237287	92239033	1747	chr11_92237287_92239033	L1M3c	LINE/L1	LINE	L1	2.58496250072116	0	2.58496250072116	0.015721029200463	up
chr14	32874347	32875029	683	chr14_32874347_32875029	L1MdFanc_II	LINE/L1	LINE	L1	2.58496250072116	0	2.58496250072116	0.0383576300191877	up
chr17	83005414	83006040	627	chr17_83005414_83006040	Lx9	LINE/L1	LINE	L1	2.58496250072116	0	2.58496250072116	0.0383448604088582	up
chr2	145071601	145074640	3040	chr2_145071601_145074640	L1M2	LINE/L1	LINE	L1	2.58496250072116	0	2.58496250072116	0.015725802381332	up
chr9	82394572	82395273	702	chr9_82394572_82395273	Lx3C	LINE/L1	LINE	L1	2.58496250072116	0	2.58496250072116	0.0335216595740348	up
chrX	97622871	97625497	2627	chrX_97622871_97625497	Lx8b	LINE/L1	LINE	L1	2.58496250072116	0	2.58496250072116	0.0335166778549318	up
chr19	42251507	42253316	1810	chr19_42251507_42253316	L2a	LINE/L2	LINE	L2	2.58496250072116	0	2.58496250072116	0.0335166778549318	up
chr13	54018277	54020708	2432	chr13_54018277_54020708	Lx9	LINE/L1	LINE	L1	5.28540221886225	2.66296501272243	2.62243720613982	3.60430624694039E-07	up
chr18	62354917	62355555	639	chr18_62354917_62355555	B1_Mur1	SINE/Alu	SINE	Alu	3.85798099512757	1.22239242133645	2.63558857379112	0.00674537622915542	up
chr8	96144321	96150817	6497	chr8_96144321_96150817	L1Lx_III	LINE/L1	LINE	L1	3.64385618977472	1	2.64385618977472	0.0447099383911315	up
chr14	18004584	18004705	122	chr14_18004584_18004705	B1_Mus2	SINE/Alu	SINE	Alu	2.70043971814109	0	2.70043971814109	0.0282948050855751	up
chr15	80811947	80812191	245	chr15_80811947_80812191	B1_Mus2	SINE/Alu	SINE	Alu	2.70043971814109	0	2.70043971814109	0.0474519837710945	up
chr2	10782277	10782570	294	chr2_10782277_10782570	B1F	SINE/Alu	SINE	Alu	2.70043971814109	0	2.70043971814109	0.0282948050855751	up
chr9	50149416	50149666	251	chr9_50149416_50149666	B3A	SINE/B2	SINE	B2	2.70043971814109	0	2.70043971814109	0.0282849184361641	up
chr11	107764352	107764640	289	chr11_107764352_107764640	RSINE1	SINE/B4	SINE	B4	2.70043971814109	0	2.70043971814109	0.0160142296681321	up
chr13	48010908	48011051	144	chr13_48010908_48011051	RSINE1	SINE/B4	SINE	B4	2.70043971814109	0	2.70043971814109	0.0282948050855751	up
chr14	78009138	78009405	268	chr14_78009138_78009405	B4	SINE/B4	SINE	B4	2.70043971814109	0	2.70043971814109	0.0474434167106854	up
chr9	113496130	113496468	339	chr9_113496130_113496468	ID_B1	SINE/B4	SINE	B4	2.70043971814109	0	2.70043971814109	0.0474397394939149	up
chrX	58144075	58144233	159	chrX_58144075_58144233	ID_B1	SINE/B4	SINE	B4	2.70043971814109	0	2.70043971814109	0.0282849184361641	up
chr11	31989913	31989969	57	chr11_31989913_31989969	RLTR20A4	LTR/ERVK	LTR	ERVK	2.70043971814109	0	2.70043971814109	0.0280159484872925	up
chr14	92517611	92517883	273	chr14_92517611_92517883	RMER17C2	LTR/ERVK	LTR	ERVK	2.70043971814109	0	2.70043971814109	0.0474397394939149	up
chr9	5751126	5751175	50	chr9_5751126_5751175	RLTR20C2_MM	LTR/ERVK	LTR	ERVK	2.70043971814109	0	2.70043971814109	0.0110175603172461	up
chr13	51507417	51507523	107	chr13_51507417_51507523	MTEb	LTR/ERVL-MaLR	LTR	ERVL-MaLR	2.70043971814109	0	2.70043971814109	0.0282849184361641	up
chr2	30764104	30765777	1674	chr2_30764104_30765777	MTE-int	LTR/ERVL-MaLR	LTR	ERVL-MaLR	2.70043971814109	0	2.70043971814109	0.0474489787243161	up
chr4	90867282	90867616	335	chr4_90867282_90867616	ORR1E	LTR/ERVL-MaLR	LTR	ERVL-MaLR	2.70043971814109	0	2.70043971814109	0.0474397394939149	up
chr7	113278663	113278735	73	chr7_113278663_113278735	ID4	SINE/ID	SINE	ID	2.70043971814109	0	2.70043971814109	0.0474397394939149	up
chr11	40513342	40517370	4029	chr11_40513342_40517370	L1MB7	LINE/L1	LINE	L1	2.70043971814109	0	2.70043971814109	0.0474556622446577	up
chr13	78494985	78495243	259	chr13_78494985_78495243	L1Lx_I	LINE/L1	LINE	L1	2.70043971814109	0	2.70043971814109	0.0282849184361641	up
chr2	5208925	5211797	2873	chr2_5208925_5211797	L1MA8	LINE/L1	LINE	L1	2.70043971814109	0	2.70043971814109	0.0474367354738425	up
chr2	97701944	97702352	409	chr2_97701944_97702352	Lx3B	LINE/L1	LINE	L1	2.70043971814109	0	2.70043971814109	0.0282849184361641	up
chrX	122542070	122543556	1487	chrX_122542070_122543556	L1_Mur2	LINE/L1	LINE	L1	2.70043971814109	0	2.70043971814109	0.0193808000277921	up
chr9	122215520	122216115	596	chr9_122215520_122216115	L1MC2	LINE/L1	LINE	L1	3.95419631038688	1.22239242133645	2.73180388905043	0.00477905320029878	up
chr11	94109471	94110187	717	chr11_94109471_94110187	PB1D9	SINE/Alu	SINE	Alu	3.16992500144231	0.415037499278844	2.75488750216347	0.0252533402731317	up
chr14	12908620	12910980	2361	chr14_12908620_12910980	L1_Mur3	LINE/L1	LINE	L1	3.75488750216347	1	2.75488750216347	0.00507459168450196	up
chr6	127305601	127307336	1736	chr6_127305601_127307336	L1MD3	LINE/L1	LINE	L1	4	1.22239242133645	2.77760757866355	0.00129385137714028	up
chr5	141711477	141711834	358	chr5_141711477_141711834	B1_Mur2	SINE/Alu	SINE	Alu	2.8073549220576	0	2.8073549220576	0.037808889703958	up
chr10	93407372	93407411	40	chr10_93407372_93407411	B2_Mm2	SINE/B2	SINE	B2	2.8073549220576	0	2.8073549220576	0.0377988579193326	up
chr6	58541065	58541270	206	chr6_58541065_58541270	B3	SINE/B2	SINE	B2	2.8073549220576	0	2.8073549220576	0.0378065904402419	up
chr9	102016992	102017214	223	chr9_102016992_102017214	ID_B1	SINE/B4	SINE	B4	2.8073549220576	0	2.8073549220576	0.0210271864489612	up
chrX	10790283	10790435	153	chrX_10790283_10790435	RSINE1	SINE/B4	SINE	B4	2.8073549220576	0	2.8073549220576	0.0378117042293219	up
chrX	38252877	38253112	236	chrX_38252877_38253112	CR1_Mam	LINE/CR1	LINE	CR1	2.8073549220576	0	2.8073549220576	0.037808889703958	up
chr1	39867560	39867619	60	chr1_39867560_39867619	RLTR20C2_MM	LTR/ERVK	LTR	ERVK	2.8073549220576	0	2.8073549220576	0.0210195871927602	up
chr13	103416886	103417738	853	chr13_103416886_103417738	RMER19B	LTR/ERVK	LTR	ERVK	2.8073549220576	0	2.8073549220576	0.0377988579193326	up
chrX	116623023	116626822	3800	chrX_116623023_116626822	RMER17C-int	LTR/ERVK	LTR	ERVK	2.8073549220576	0	2.8073549220576	0.0197893748625228	up
chr16	9891181	9891230	50	chr16_9891181_9891230	RMER15	LTR/ERVL	LTR	ERVL	2.8073549220576	0	2.8073549220576	0.0210195871927602	up
chr2	71776619	71777046	428	chr2_71776619_71777046	MLT1H1	LTR/ERVL-MaLR	LTR	ERVL-MaLR	2.8073549220576	0	2.8073549220576	0.0210195871927602	up
chr13	105629963	105630548	586	chr13_105629963_105630548	Lx7	LINE/L1	LINE	L1	2.8073549220576	0	2.8073549220576	0.0210195871927602	up
chr14	36911096	36912054	959	chr14_36911096_36912054	Lx8	LINE/L1	LINE	L1	2.8073549220576	0	2.8073549220576	0.0378016714173623	up
chr15	13004436	13004898	463	chr15_13004436_13004898	Lx8	LINE/L1	LINE	L1	2.8073549220576	0	2.8073549220576	0.037808889703958	up
chr2	123591213	123591320	108	chr2_123591213_123591320	L2a	LINE/L2	LINE	L2	2.8073549220576	0	2.8073549220576	0.0377988579193326	up
chr4	142605737	142606036	300	chr4_142605737_142606036	L2b	LINE/L2	LINE	L2	2.8073549220576	0	2.8073549220576	0.0228427523176363	up
chr16	23975692	23976557	866	chr16_23975692_23976557	MIR	SINE/MIR	SINE	MIR	2.8073549220576	0	2.8073549220576	0.00379381141982005	up
chr17	69433383	69433606	224	chr17_69433383_69433606	PB1D9	SINE/Alu	SINE	Alu	3.24792751344359	0.415037499278844	2.83289001416474	0.0317554754864472	up
chr5	21328354	21328649	296	chr5_21328354_21328649	PB1D9	SINE/Alu	SINE	Alu	3.58496250072116	0.736965594166206	2.84799690655495	0.0325417512999083	up
chr10	23988554	23988798	245	chr10_23988554_23988798	PB1D9	SINE/Alu	SINE	Alu	2.90689059560852	0	2.90689059560852	0.0229373317982759	up
chr10	93407072	93407371	300	chr10_93407072_93407371	B1_Mus1	SINE/Alu	SINE	Alu	2.90689059560852	0	2.90689059560852	0.0156133639599609	up
chr13	92977937	92978080	144	chr13_92977937_92978080	B1_Mur4	SINE/Alu	SINE	Alu	2.90689059560852	0	2.90689059560852	0.0157788439637239	up
chr8	83294511	83294565	55	chr8_83294511_83294565	B1_Mur1	SINE/Alu	SINE	Alu	2.90689059560852	0	2.90689059560852	0.0157788439637239	up
chr9	86697655	86697810	156	chr9_86697655_86697810	B3A	SINE/B2	SINE	B2	2.90689059560852	0	2.90689059560852	0.0157788439637239	up
chr11	88285857	88285921	65	chr11_88285857_88285921	ID_B1	SINE/B4	SINE	B4	2.90689059560852	0	2.90689059560852	0.0303781243422106	up
chr13	92811851	92811981	131	chr13_92811851_92811981	RSINE1	SINE/B4	SINE	B4	2.90689059560852	0	2.90689059560852	0.0157788439637239	up
chr10	121045385	121045443	59	chr10_121045385_121045443	RLTR20C1_MM	LTR/ERVK	LTR	ERVK	2.90689059560852	0	2.90689059560852	0.0156133639599609	up
chr12	104804046	104804336	291	chr12_104804046_104804336	RLTR17B_Mm	LTR/ERVK	LTR	ERVK	2.90689059560852	0	2.90689059560852	0.0303781243422106	up
chr16	10294123	10294180	58	chr16_10294123_10294180	RLTR20A4	LTR/ERVK	LTR	ERVK	2.90689059560852	0	2.90689059560852	0.00898719203979833	up
chr2	3090867	3091810	944	chr2_3090867_3091810	RMER17D	LTR/ERVK	LTR	ERVK	2.90689059560852	0	2.90689059560852	0.032287057610449	up
chr7	135289293	135289748	456	chr7_135289293_135289748	RMER17C	LTR/ERVK	LTR	ERVK	2.90689059560852	0	2.90689059560852	0.0157788439637239	up
chr3	61249906	61250084	179	chr3_61249906_61250084	ORR1C2	LTR/ERVL-MaLR	LTR	ERVL-MaLR	2.90689059560852	0	2.90689059560852	0.0157730206028668	up
chr5	146082084	146084966	2883	chr5_146082084_146084966	ORR1B2-int	LTR/ERVL-MaLR	LTR	ERVL-MaLR	2.90689059560852	0	2.90689059560852	0.00898571485550513	up
chr12	40240855	40241673	819	chr12_40240855_40241673	Lx8	LINE/L1	LINE	L1	2.90689059560852	0	2.90689059560852	0.0157788439637239	up
chr13	92978082	92978487	406	chr13_92978082_92978487	Lx8	LINE/L1	LINE	L1	2.90689059560852	0	2.90689059560852	0.0303863367845916	up
chr14	70050703	70050857	155	chr14_70050703_70050857	B1_Mur4	SINE/Alu	SINE	Alu	3	0	3	0.0246435426546524	up
chr4	128024709	128024811	103	chr4_128024709_128024811	B1_Mur3	SINE/Alu	SINE	Alu	3	0	3	0.0119692088665305	up
chr8	91774160	91774478	319	chr8_91774160_91774478	B1_Mur1	SINE/Alu	SINE	Alu	3	0	3	0.00498231583604611	up
chr1	39867658	39867729	72	chr1_39867658_39867729	RLTR20A4	LTR/ERVK	LTR	ERVK	3	0	3	0.0119692088665305	up
chr10	52824494	52824606	113	chr10_52824494_52824606	RLTR31D_MM	LTR/ERVK	LTR	ERVK	3	0	3	0.0119692088665305	up
chr16	10294001	10294058	58	chr16_10294001_10294058	RLTR20A4	LTR/ERVK	LTR	ERVK	3	0	3	0.0119736734144891	up
chr4	23935376	23935832	457	chr4_23935376_23935832	MLTR11A	LTR/ERVK	LTR	ERVK	3	0	3	0.0348961867989936	up
chr9	42488365	42489970	1606	chr9_42488365_42489970	MTE-int	LTR/ERVL-MaLR	LTR	ERVL-MaLR	3	0	3	0.0263463250234025	up
chr14	118099262	118100075	814	chr14_118099262_118100075	B1_Mur1	SINE/Alu	SINE	Alu	4.24792751344359	1.22239242133645	3.02553509210714	0.00293219206556236	up
chr16	66575133	66575188	56	chr16_66575133_66575188	B1_Mur4	SINE/Alu	SINE	Alu	3.08746284125034	0	3.08746284125034	0.00309382683544304	up
chr3	22027710	22027781	72	chr3_22027710_22027781	B1_Mus2	SINE/Alu	SINE	Alu	3.08746284125034	0	3.08746284125034	0.0201742791855393	up
chr11	32782223	32782361	139	chr11_32782223_32782361	B3A	SINE/B2	SINE	B2	3.08746284125034	0	3.08746284125034	0.00919717460186758	up
chrX	16851016	16851348	333	chrX_16851016_16851348	B3A	SINE/B2	SINE	B2	3.08746284125034	0	3.08746284125034	0.00919374138620562	up
chr10	94127551	94127647	97	chr10_94127551_94127647	RLTR20A4	LTR/ERVK	LTR	ERVK	3.08746284125034	0	3.08746284125034	0.0201787517477908	up
chr5	96741609	96741672	64	chr5_96741609_96741672	RLTR20C2_MM	LTR/ERVK	LTR	ERVK	3.08746284125034	0	3.08746284125034	0.00919717460186758	up
chr12	99405469	99405881	413	chr12_99405469_99405881	MTC	LTR/ERVL-MaLR	LTR	ERVL-MaLR	3.08746284125034	0	3.08746284125034	0.00919717460186758	up
chr1	29877330	29880892	3563	chr1_29877330_29880892	L1Lx_IV	LINE/L1	LINE	L1	3.08746284125034	0	3.08746284125034	0.0370090683716948	up
chr4	145048751	145048826	76	chr4_145048751_145048826	Lx9	LINE/L1	LINE	L1	3.08746284125034	0	3.08746284125034	0.0018438126177476	up
chr6	11717334	11718181	848	chr6_11717334_11718181	Lx8	LINE/L1	LINE	L1	3.08746284125034	0	3.08746284125034	0.00919717460186758	up
chr14	92693610	92693934	325	chr14_92693610_92693934	Lx8	LINE/L1	LINE	L1	3.52356195605701	0.415037499278844	3.10852445677817	0.0411861870809647	up
chr11	69153221	69153350	130	chr11_69153221_69153350	B1_Mus1	SINE/Alu	SINE	Alu	3.16992500144231	0	3.16992500144231	0.0166356861532349	up
chr13	95460470	95460692	223	chr13_95460470_95460692	PB1D9	SINE/Alu	SINE	Alu	3.16992500144231	0	3.16992500144231	0.023897249339764	up
chr16	7825258	7825396	139	chr16_7825258_7825396	B1F2	SINE/Alu	SINE	Alu	3.16992500144231	0	3.16992500144231	0.00715475665203527	up
chr5	122562591	122562982	392	chr5_122562591_122562982	B3A	SINE/B2	SINE	B2	3.16992500144231	0	3.16992500144231	0.0166356861532349	up
chr1	105485682	105486316	635	chr1_105485682_105486316	RMER17C	LTR/ERVK	LTR	ERVK	3.16992500144231	0	3.16992500144231	0.00805437321628897	up
chr10	11019056	11019126	71	chr10_11019056_11019126	RLTR20A4	LTR/ERVK	LTR	ERVK	3.16992500144231	0	3.16992500144231	0.00715475665203527	up
chr10	44172151	44172214	64	chr10_44172151_44172214	RLTR20A4	LTR/ERVK	LTR	ERVK	3.16992500144231	0	3.16992500144231	0.023905083425016	up
chr3	137058996	137060521	1526	chr3_137058996_137060521	RMER12	LTR/ERVK	LTR	ERVK	3.16992500144231	0	3.16992500144231	0.0178636046474588	up
chr6	100571193	100571249	57	chr6_100571193_100571249	RLTR20A4	LTR/ERVK	LTR	ERVK	3.16992500144231	0	3.16992500144231	0.00715475665203527	up
chr1	107742889	107745718	2830	chr1_107742889_107745718	Lx3A	LINE/L1	LINE	L1	4.16992500144231	1	3.16992500144231	0.00568999078682365	up
chr4	58866630	58866992	363	chr4_58866630_58866992	B1_Mm	SINE/Alu	SINE	Alu	3.24792751344359	0	3.24792751344359	0.0374264115938957	up
chr13	76645914	76646054	141	chr13_76645914_76646054	B3A	SINE/B2	SINE	B2	3.24792751344359	0	3.24792751344359	0.00561724194557236	up
chr14	117094788	117095144	357	chr14_117094788_117095144	B4	SINE/B4	SINE	B4	3.24792751344359	0	3.24792751344359	0.0137818242870045	up
chr4	9828610	9828731	122	chr4_9828610_9828731	RSINE1	SINE/B4	SINE	B4	3.24792751344359	0	3.24792751344359	0.0374501023482184	up
chr6	137498534	137498660	127	chr6_137498534_137498660	ID_B1	SINE/B4	SINE	B4	3.24792751344359	0	3.24792751344359	0.00561724194557236	up
chr8	118882178	118882312	135	chr8_118882178_118882312	B4A	SINE/B4	SINE	B4	3.24792751344359	0	3.24792751344359	0.00561510298797979	up
chr12	118871263	118872083	821	chr12_118871263_118872083	RMER13B	LTR/ERVK	LTR	ERVK	3.24792751344359	0	3.24792751344359	0.0148142478550877	up
chr6	106650244	106650907	664	chr6_106650244_106650907	L1MC4	LINE/L1	LINE	L1	3.24792751344359	0	3.24792751344359	0.00561724194557236	up
chr9	48314042	48316261	2220	chr9_48314042_48316261	L1MB2	LINE/L1	LINE	L1	3.24792751344359	0	3.24792751344359	0.0137811363187677	up
chr8	46481754	46481939	186	chr8_46481754_46481939	B3A	SINE/B2	SINE	B2	3.32192809488736	0	3.32192809488736	0.0045850199526915	up
chr1	121980783	121981488	706	chr1_121980783_121981488	B4A	SINE/B4	SINE	B4	3.32192809488736	0	3.32192809488736	0.00443266089015771	up
chr8	116849799	116850260	462	chr8_116849799_116850260	B4A	SINE/B4	SINE	B4	3.32192809488736	0	3.32192809488736	0.0166453339843188	up
chr9	96427318	96427469	152	chr9_96427318_96427469	ID_B1	SINE/B4	SINE	B4	3.32192809488736	0	3.32192809488736	0.00443266089015771	up
chr13	88916585	88917125	541	chr13_88916585_88917125	RMER17D2	LTR/ERVK	LTR	ERVK	3.32192809488736	0	3.32192809488736	0.0114560115803162	up
chr8	7892027	7892150	124	chr8_7892027_7892150	RLTR20C1_MM	LTR/ERVK	LTR	ERVK	3.32192809488736	0	3.32192809488736	0.0319023288179418	up
chr6	72627967	72628178	212	chr6_72627967_72628178	MER2	DNA/TcMar-Tigger	DNA	TcMar-Tigger	3.32192809488736	0	3.32192809488736	0.00443266089015771	up
chr2	128789677	128789812	136	chr2_128789677_128789812	B1_Mm	SINE/Alu	SINE	Alu	3.39231742277876	0	3.39231742277876	0.00108522757307419	up
chr12	58652403	58652769	367	chr12_58652403_58652769	B4A	SINE/B4	SINE	B4	3.39231742277876	0	3.39231742277876	0.0272892428573709	up
chr15	36123629	36123796	168	chr15_36123629_36123796	B4A	SINE/B4	SINE	B4	3.39231742277876	0	3.39231742277876	0.00351747833026648	up
chr17	77258227	77258280	54	chr17_77258227_77258280	RLTR20A4	LTR/ERVK	LTR	ERVK	3.39231742277876	0	3.39231742277876	0.0272892428573709	up
chr17	77258291	77258359	69	chr17_77258291_77258359	RLTR20C2_MM	LTR/ERVK	LTR	ERVK	3.39231742277876	0	3.39231742277876	0.0272892428573709	up
chr6	129416581	129417211	631	chr6_129416581_129417211	RMER17C2	LTR/ERVK	LTR	ERVK	3.39231742277876	0	3.39231742277876	0.00953669329501625	up
chr14	118802627	118802765	139	chr14_118802627_118802765	RLTR17B_Mm	LTR/ERVK	LTR	ERVK	3.4594316186373	0	3.4594316186373	0.00803391742069615	up
chr16	56209024	56209671	648	chr16_56209024_56209671	Lx9	LINE/L1	LINE	L1	3.4594316186373	0	3.4594316186373	0.0164377980697122	up
chr2	51350215	51351323	1109	chr2_51350215_51351323	Lx8b	LINE/L1	LINE	L1	3.4594316186373	0	3.4594316186373	0.0283623469940219	up
chr9	96426994	96427298	305	chr9_96426994_96427298	B1_Mur1	SINE/Alu	SINE	Alu	3.52356195605701	0	3.52356195605701	0.00968179882674557	up
chr1	151873478	151873630	153	chr1_151873478_151873630	B4	SINE/B4	SINE	B4	3.52356195605701	0	3.52356195605701	0.00225521690644581	up
chr7	67429855	67430992	1138	chr7_67429855_67430992	B1_Mm	SINE/Alu	SINE	Alu	3.58496250072116	0	3.58496250072116	0.00568266922104714	up
chr5	96741830	96741908	79	chr5_96741830_96741908	B3A	SINE/B2	SINE	B2	3.58496250072116	0	3.58496250072116	0.00182271335683699	up
chr19	55811294	55811352	59	chr19_55811294_55811352	RLTR20C1_MM	LTR/ERVK	LTR	ERVK	3.58496250072116	0	3.58496250072116	0.00182271335683699	up
chr9	116839583	116839685	103	chr9_116839583_116839685	MER20	DNA/hAT-Charlie	DNA	hAT-Charlie	3.58496250072116	0	3.58496250072116	0.00182271335683699	up
chr2	165615195	165615257	63	chr2_165615195_165615257	RLTR20A4	LTR/ERVK	LTR	ERVK	3.64385618977472	0	3.64385618977472	0.0183239986345903	up
chr12	57785794	57786522	729	chr12_57785794_57786522	Lx9	LINE/L1	LINE	L1	3.64385618977472	0	3.64385618977472	0.00729408075880877	up
chr15	55458457	55458531	75	chr15_55458457_55458531	RLTR31D_MM	LTR/ERVK	LTR	ERVK	3.70043971814109	0	3.70043971814109	0.0000151381843608819	up
chr4	113892473	113894754	2282	chr4_113892473_113894754	MurERV4-int	LTR/ERVK	LTR	ERVK	3.70043971814109	0	3.70043971814109	0.0125175980773807	up
chr10	45905775	45905832	58	chr10_45905775_45905832	RLTR20A4	LTR/ERVK	LTR	ERVK	3.8073549220576	0	3.8073549220576	0.00469517955673075	up
chr6	147118710	147119876	1167	chr6_147118710_147119876	MER2	DNA/TcMar-Tigger	DNA	TcMar-Tigger	4.61470984411521	0.736965594166206	3.877744249949	0.00162064338189956	up
chr8	77448491	77449516	1026	chr8_77448491_77449516	B4A	SINE/B4	SINE	B4	4.32192809488736	0.415037499278844	3.90689059560852	0.00358378656736138	up
chr7	14695987	14702105	6119	chr7_14695987_14702105	Lx3A	LINE/L1	LINE	L1	3.90689059560852	0	3.90689059560852	0.00167782121904487	up
chr1	110471948	110474559	2612	chr1_110471948_110474559	L1_Mur1	LINE/L1	LINE	L1	4.16992500144231	0	4.16992500144231	0.000418095810345571	up

## Sheet: WT-LPS vs WT p<0.05 supp
Table S1. Differentially H3K9me3 enriched TEs in WT-LPS vs WT pvalue<0.05 related to Figure S1
seqnames	start	end	width	range	ID	comb_ClassFamily	Class	Familly	log2(Conc_WTLPS)	log2(Conc_WT)	log2 Fold	p.value	status
chr6	90517174	90517272	99	chr6_90517174_90517272	B1_Mur1	SINE/Alu	SINE	Alu	0	5.14974711950468	-5.14974711950468	1.06950966595177E-06	down
chr3	67073573	67074108	536	chr3_67073573_67074108	Lx3B	LINE/L1	LINE	L1	0	5.10852445677817	-5.10852445677817	0.0424238512096066	down
chr9	67062707	67063077	371	chr9_67062707_67063077	B1_Mus2	SINE/Alu	SINE	Alu	1.32192809488736	6.05528243550119	-4.73335434061383	0.00932626412075387	down
chr2	157165579	157165696	118	chr2_157165579_157165696	ERVL-int	LTR/ERVL	LTR	ERVL	0	4.4594316186373	-4.4594316186373	0.0475901806275917	down
chr7	6628336	6630585	2250	chr7_6628336_6630585	RodERV21-int	LTR/ERV1	LTR	ERV1	0	4.4594316186373	-4.4594316186373	0.0316313821027576	down
chr16	30901674	30901989	316	chr16_30901674_30901989	B1_Mus2	SINE/Alu	SINE	Alu	0.584962500721156	4.93073733756289	-4.34577483684173	0.0089831827827136	down
chr15	91140434	91141703	1270	chr15_91140434_91141703	L1MB2	LINE/L1	LINE	L1	0	4.32192809488736	-4.32192809488736	0.04857784704589	down
chr6	90518562	90518660	99	chr6_90518562_90518660	B1_Mur1	SINE/Alu	SINE	Alu	0	4.32192809488736	-4.32192809488736	0.0000503548699826377	down
chr4	137179433	137179511	79	chr4_137179433_137179511	MIR3	SINE/MIR	SINE	MIR	0	4.28540221886225	-4.28540221886225	0.0488296012433198	down
chr17	74032852	74033604	753	chr17_74032852_74033604	L2	LINE/L2	LINE	L2	0.584962500721156	4.83289001416474	-4.24792751344359	0.03459765521902	down
chr9	13503709	13504182	474	chr9_13503709_13504182	B1_Mus2	SINE/Alu	SINE	Alu	0	4.16992500144231	-4.16992500144231	0.0497122304258658	down
chr10	15879320	15881329	2010	chr10_15879320_15881329	Lx5	LINE/L1	LINE	L1	0	4.12928301694497	-4.12928301694497	0.0119462879318439	down
chr6	143056773	143056983	211	chr6_143056773_143056983	B3	SINE/B2	SINE	B2	0	3.95419631038688	-3.95419631038688	0.000254786827820126	down
chr2	167216750	167218085	1336	chr2_167216750_167218085	B4A	SINE/B4	SINE	B4	0	3.90689059560852	-3.90689059560852	0.000350482124450405	down
chr8	10691929	10692568	640	chr8_10691929_10692568	ORR1B1-int	LTR/ERVL-MaLR	LTR	ERVL-MaLR	0	3.8073549220576	-3.8073549220576	0.00806214592158692	down
chr17	85357253	85357765	513	chr17_85357253_85357765	B3A	SINE/B2	SINE	B2	0	3.75488750216347	-3.75488750216347	0.00821423288042846	down
chr9	71028896	71029178	283	chr9_71028896_71029178	B1_Mur3	SINE/Alu	SINE	Alu	0	3.75488750216347	-3.75488750216347	0.019069541287798	down
chr9	38157652	38158891	1240	chr9_38157652_38158891	Lx2B2	LINE/L1	LINE	L1	0	3.70043971814109	-3.70043971814109	0.0118550776658894	down
chr6	108192078	108192216	139	chr6_108192078_108192216	B3A	SINE/B2	SINE	B2	0	3.58496250072116	-3.58496250072116	0.00127126312741908	down
chr9	122215520	122216115	596	chr9_122215520_122216115	L1MC2	LINE/L1	LINE	L1	0	3.52356195605701	-3.52356195605701	0.019102761786858	down
chr2	69817231	69817530	300	chr2_69817231_69817530	B1_Mus2	SINE/Alu	SINE	Alu	1	4.52356195605701	-3.52356195605701	0.049513483523446	down
chr1	96956445	96959166	2722	chr1_96956445_96959166	Lx	LINE/L1	LINE	L1	0	3.4594316186373	-3.4594316186373	0.0207119283033257	down
chr17	20163341	20164268	928	chr17_20163341_20164268	Lx9	LINE/L1	LINE	L1	0.584962500721156	4	-3.41503749927884	0.00619012212431125	down
chr1	145109575	145113028	3454	chr1_145109575_145113028	RLTR1B-int	LTR/ERV1	LTR	ERV1	0	3.39231742277876	-3.39231742277876	0.0358177937982588	down
chr2	80200683	80203276	2594	chr2_80200683_80203276	L1MdF_V	LINE/L1	LINE	L1	0	3.32192809488736	-3.32192809488736	0.0369575196281152	down
chr5	89598363	89599752	1390	chr5_89598363_89599752	Lx8b	LINE/L1	LINE	L1	0	3.32192809488736	-3.32192809488736	0.003880176130416	down
chr8	116007082	116007490	409	chr8_116007082_116007490	L1MA6	LINE/L1	LINE	L1	0.584962500721156	3.90689059560852	-3.32192809488736	0.00914177383132205	down
chr5	94743949	94744464	516	chr5_94743949_94744464	Lx5b	LINE/L1	LINE	L1	0	3.24792751344359	-3.24792751344359	0.00531850505622632	down
chr7	94609765	94611508	1744	chr7_94609765_94611508	Lx4A	LINE/L1	LINE	L1	0	3.24792751344359	-3.24792751344359	0.034388272768652	down
chr1	48967024	48967213	190	chr1_48967024_48967213	ORR1F	LTR/ERVL-MaLR	LTR	ERVL-MaLR	0	3.24792751344359	-3.24792751344359	0.00979373278175321	down
chr3	52453995	52456126	2132	chr3_52453995_52456126	L1MA4	LINE/L1	LINE	L1	0.584962500721156	3.8073549220576	-3.22239242133645	0.0174692542892946	down
chr11	95799219	95799830	612	chr11_95799219_95799830	B1_Mur3	SINE/Alu	SINE	Alu	1.58496250072116	4.78135971352466	-3.1963972128035	0.000195626042420314	down
chr18	24551959	24552526	568	chr18_24551959_24552526	RLTR6B_Mm	LTR/ERV1	LTR	ERV1	0.584962500721156	3.75488750216347	-3.16992500144231	0.0166245029709068	down
chr5	70556534	70557183	650	chr5_70556534_70557183	MMERVK10C-int	LTR/ERVK	LTR	ERVK	0	3.16992500144231	-3.16992500144231	0.0397595661472286	down
chr4	136108919	136109127	209	chr4_136108919_136109127	B1_Mus2	SINE/Alu	SINE	Alu	0	3.16992500144231	-3.16992500144231	0.046216626568255	down
chr7	88378531	88379009	479	chr7_88378531_88379009	B1_Mus1	SINE/Alu	SINE	Alu	3	6.14974711950468	-3.14974711950468	7.70477715963728E-10	down
chr12	63673139	63675271	2133	chr12_63673139_63675271	L1MdF_III	LINE/L1	LINE	L1	0.584962500721156	3.64385618977472	-3.05889368905357	0.0222194135266258	down
chr3	13183150	13184312	1163	chr3_13183150_13184312	L1MdF_V	LINE/L1	LINE	L1	0	3	-3	0.013655455964124	down
chr5	95074170	95074685	516	chr5_95074170_95074685	Lx5b	LINE/L1	LINE	L1	0	3	-3	0.0136564348522404	down
chr3	124246325	124246976	652	chr3_124246325_124246976	RLTR40	LTR/ERVK	LTR	ERVK	0	3	-3	0.0142923920284007	down
chr4	18031883	18033497	1615	chr4_18031883_18033497	Lx7	LINE/L1	LINE	L1	0	2.90689059560852	-2.90689059560852	0.0201586713498511	down
chr10	99116970	99117103	134	chr10_99116970_99117103	B4A	SINE/B4	SINE	B4	0	2.90689059560852	-2.90689059560852	0.0190176112018903	down
chr8	79961054	79962521	1468	chr8_79961054_79962521	L1MC1	LINE/L1	LINE	L1	0.584962500721156	3.4594316186373	-2.87446911791614	0.039052244205725	down
chr10	28844895	28846304	1410	chr10_28844895_28846304	Lx7	LINE/L1	LINE	L1	0	2.8073549220576	-2.8073549220576	0.0261164667090997	down
chr14	37408558	37410570	2013	chr14_37408558_37410570	Lx8b	LINE/L1	LINE	L1	0	2.8073549220576	-2.8073549220576	0.0273328967439723	down
chr3	110455530	110457664	2135	chr3_110455530_110457664	Lx8b	LINE/L1	LINE	L1	0.584962500721156	3.39231742277876	-2.8073549220576	0.0466547521896642	down
chr4	147840673	147842389	1717	chr4_147840673_147842389	Lx6	LINE/L1	LINE	L1	0	2.8073549220576	-2.8073549220576	0.0265368879896418	down
chr7	66625655	66627894	2240	chr7_66625655_66627894	MTD-int	LTR/ERVL-MaLR	LTR	ERVL-MaLR	0	2.8073549220576	-2.8073549220576	0.0261164667090997	down
chr17	87492761	87493061	301	chr17_87492761_87493061	B4	SINE/B4	SINE	B4	0	2.8073549220576	-2.8073549220576	0.0273328967439723	down
chr2	30493768	30494753	986	chr2_30493768_30494753	B4A	SINE/B4	SINE	B4	0	2.8073549220576	-2.8073549220576	0.0261145506302321	down
chr4	41152953	41153805	853	chr4_41152953_41153805	RSINE1	SINE/B4	SINE	B4	1.32192809488736	4.08746284125034	-2.76553474636298	0.0110339639244213	down
chr1	20115229	20116623	1395	chr1_20115229_20116623	L1MdMus_I	LINE/L1	LINE	L1	0	2.70043971814109	-2.70043971814109	0.0358319303450252	down
chr10	22796528	22797255	728	chr10_22796528_22797255	Lx6	LINE/L1	LINE	L1	0	2.70043971814109	-2.70043971814109	0.0370252308190769	down
chr11	92536450	92537586	1137	chr11_92536450_92537586	Lx10	LINE/L1	LINE	L1	0	2.70043971814109	-2.70043971814109	0.0362121386498838	down
chr12	103537869	103538893	1025	chr12_103537869_103538893	L1MB7	LINE/L1	LINE	L1	0	2.70043971814109	-2.70043971814109	0.049301524670754	down
chr4	20069094	20071201	2108	chr4_20069094_20071201	Lx8	LINE/L1	LINE	L1	0	2.70043971814109	-2.70043971814109	0.0493155877152952	down
chr5	95041760	95042307	548	chr5_95041760_95042307	Lx5b	LINE/L1	LINE	L1	0	2.70043971814109	-2.70043971814109	0.0362121386498838	down
chr6	102010715	102011702	988	chr6_102010715_102011702	L1MdF_I	LINE/L1	LINE	L1	0	2.70043971814109	-2.70043971814109	0.0370252308190769	down
chrX	26260823	26261850	1028	chrX_26260823_26261850	Lx2	LINE/L1	LINE	L1	0	2.70043971814109	-2.70043971814109	0.0362121386498838	down
chr1	117820032	117822505	2474	chr1_117820032_117822505	ORR1A0-int	LTR/ERVL-MaLR	LTR	ERVL-MaLR	0	2.70043971814109	-2.70043971814109	0.0384390465650208	down
chr11	23598833	23600961	2129	chr11_23598833_23600961	MTA_Mm-int	LTR/ERVL-MaLR	LTR	ERVL-MaLR	0	2.70043971814109	-2.70043971814109	0.0362081873496413	down
chr10	48081800	48082055	256	chr10_48081800_48082055	ID_B1	SINE/B4	SINE	B4	0	2.70043971814109	-2.70043971814109	0.0362081873496413	down
chr3	44206511	44206764	254	chr3_44206511_44206764	B4	SINE/B4	SINE	B4	0	2.70043971814109	-2.70043971814109	0.049301524670754	down
chr3	54939538	54939684	147	chr3_54939538_54939684	B1_Mur2	SINE/Alu	SINE	Alu	0	2.70043971814109	-2.70043971814109	0.0493155877152952	down
chr5	93732629	93732800	172	chr5_93732629_93732800	B3A	SINE/B2	SINE	B2	0	2.70043971814109	-2.70043971814109	0.0493155877152952	down
chr6	51544906	51545976	1071	chr6_51544906_51545976	B3A	SINE/B2	SINE	B2	0	2.70043971814109	-2.70043971814109	0.049301524670754	down
chr1	119710470	119712341	1872	chr1_119710470_119712341	L1MdFanc_I	LINE/L1	LINE	L1	0	2.58496250072116	-2.58496250072116	0.0499854482791369	down
chr10	107241507	107241772	266	chr10_107241507_107241772	L1_Rod	LINE/L1	LINE	L1	0	2.58496250072116	-2.58496250072116	0.0499925344779304	down
chr3	20739741	20740613	873	chr3_20739741_20740613	L1MD	LINE/L1	LINE	L1	0	2.58496250072116	-2.58496250072116	0.0491964560156569	down
chr11	11055600	11056399	800	chr11_11055600_11056399	RMER17D2	LTR/ERVK	LTR	ERVK	0	2.58496250072116	-2.58496250072116	0.0489487734050839	down
chr16	79991390	79992212	823	chr16_79991390_79992212	RLTR13B2	LTR/ERVK	LTR	ERVK	0	2.58496250072116	-2.58496250072116	0.0499854482791369	down
chr2	173056538	173056738	201	chr2_173056538_173056738	ID_B1	SINE/B4	SINE	B4	0	2.58496250072116	-2.58496250072116	0.0499925344779304	down
chr4	3661405	3661969	565	chr4_3661405_3661969	B1_Mus2	SINE/Alu	SINE	Alu	0	2.58496250072116	-2.58496250072116	0.0491964560156569	down
chr7	79941449	79942261	813	chr7_79941449_79942261	B3A	SINE/B2	SINE	B2	0	2.58496250072116	-2.58496250072116	0.0491964560156569	down
chr8	110484609	110484802	194	chr8_110484609_110484802	B2_Mm1a	SINE/B2	SINE	B2	0	2.58496250072116	-2.58496250072116	0.0499925344779304	down
chr2	71777059	71778048	990	chr2_71777059_71778048	B1_Mur2	SINE/Alu	SINE	Alu	3.08746284125034	5.35755200461808	-2.27008916336774	0.0392031028619335	down
chr1	31963893	31965778	1886	chr1_31963893_31965778	MTA_Mm-int	LTR/ERVL-MaLR	LTR	ERVL-MaLR	2	4.08746284125034	-2.08746284125034	0.0248108213213562	down
chrX	128694310	128698327	4018	chrX_128694310_128698327	L1MdA_IV	LINE/L1	LINE	L1	2.32192809488736	4.32192809488736	-2	0.0160075025616527	down
chr7	26828722	26829191	470	chr7_26828722_26829191	B1_Mm	SINE/Alu	SINE	Alu	2	3.95419631038688	-1.95419631038688	0.0428719406885407	down
chr5	60846290	60851089	4800	chr5_60846290_60851089	L1_Mur1	LINE/L1	LINE	L1	2.58496250072116	4.52356195605701	-1.93859945533586	0.034981131952166	down
chr4	141798452	141802835	4384	chr4_141798452_141802835	MMERVK10C-int	LTR/ERVK	LTR	ERVK	2.58496250072116	4.4594316186373	-1.87446911791614	0.0136834093275123	down
chr1	23315310	23316420	1111	chr1_23315310_23316420	L1MdA_VII	LINE/L1	LINE	L1	2.58496250072116	4.4262647547021	-1.84130225398094	0.0200918203507228	down
chr15	59180611	59181634	1024	chr15_59180611_59181634	B1_Mur3	SINE/Alu	SINE	Alu	4.16992500144231	6.01122725542325	-1.84130225398094	0.0250774866463678	down
chr7	82704417	82705635	1219	chr7_82704417_82705635	L1MdTf_III	LINE/L1	LINE	L1	2.70043971814109	4.4262647547021	-1.72582503656101	0.0228000985716685	down
chrX	127197256	127202027	4772	chrX_127197256_127202027	L1MdA_III	LINE/L1	LINE	L1	3.16992500144231	4.83289001416474	-1.66296501272243	0.00909860829552877	down
chr2	21621424	21624035	2612	chr2_21621424_21624035	L1MdF_I	LINE/L1	LINE	L1	2.70043971814109	4.32192809488736	-1.62148837674627	0.0414932363174529	down
chr4	73619213	73622560	3348	chr4_73619213_73622560	ORR1A4-int	LTR/ERVL-MaLR	LTR	ERVL-MaLR	2.70043971814109	4.28540221886225	-1.58496250072116	0.047874709818466	down
chr5	95296032	95302387	6356	chr5_95296032_95302387	L1MdMus_I	LINE/L1	LINE	L1	2.8073549220576	4.35755200461808	-1.55019708256048	0.0403505739639949	down
chr3	44646631	44648213	1583	chr3_44646631_44648213	RLTR10-int	LTR/ERVK	LTR	ERVK	2.90689059560852	4.39231742277876	-1.48542682717024	0.0426856075025045	down
chr13	108568177	108569063	887	chr13_108568177_108569063	L1MdTf_II	LINE/L1	LINE	L1	3.16992500144231	4.61470984411521	-1.4447848426729	0.0312708978179137	down
chr3	33606058	33609352	3295	chr3_33606058_33609352	L1MdA_III	LINE/L1	LINE	L1	3.32192809488736	4.7279204545632	-1.40599235967584	0.0309548938608658	down
chr1	160382776	160387285	4510	chr1_160382776_160387285	L1MdA_VII	LINE/L1	LINE	L1	3.39231742277876	4.78135971352466	-1.3890422907459	0.0259373784051491	down
chr1	144783473	144786823	3351	chr1_144783473_144786823	MMERVK10C-int	LTR/ERVK	LTR	ERVK	3.4594316186373	4.8073549220576	-1.34792330342031	0.0289650277053962	down
chrX	36732328	36735167	2840	chrX_36732328_36735167	L1MdA_IV	LINE/L1	LINE	L1	3.58496250072116	4.93073733756289	-1.34577483684173	0.0237463751900772	down
chr8	53902045	53903435	1391	chr8_53902045_53903435	L1MdA_I	LINE/L1	LINE	L1	3.4594316186373	4.75488750216347	-1.29545588352617	0.0368267247007579	down
chr15	101602779	101608711	5933	chr15_101602779_101608711	L1MdA_VII	LINE/L1	LINE	L1	3.32192809488736	4.61470984411521	-1.29278174922785	0.0470123949703427	down
chr3	44648214	44652160	3947	chr3_44648214_44652160	ETnERV-int	LTR/ERVK	LTR	ERVK	3.58496250072116	4.85798099512757	-1.27301849440642	0.0298272500459738	down
chr8	3806709	3809579	2871	chr8_3806709_3809579	RLTR10-int	LTR/ERVK	LTR	ERVK	4.4594316186373	5.71424551766612	-1.25481389902883	0.00427338682136974	down
chr1	111429826	111436018	6193	chr1_111429826_111436018	L1MdGf_II	LINE/L1	LINE	L1	3.95419631038688	5.18982455888002	-1.23562824849314	0.0168583714751524	down
chr5	138040248	138046726	6479	chr5_138040248_138046726	L1MdGf_II	LINE/L1	LINE	L1	4.8073549220576	6.03342300153745	-1.22606807947985	0.00131131204525859	down
chrX	67621603	67624458	2856	chrX_67621603_67624458	RLTR10-int	LTR/ERVK	LTR	ERVK	4	5.20945336562895	-1.20945336562895	0.0186449212406184	down
chr2	50997311	51000117	2807	chr2_50997311_51000117	RLTR10-int	LTR/ERVK	LTR	ERVK	4.04439411935845	5.24792751344359	-1.20353339408513	0.0162304650797006	down
chr1	141196742	141200266	3525	chr1_141196742_141200266	L1MdGf_II	LINE/L1	LINE	L1	3.90689059560852	5.10852445677817	-1.20163386116965	0.0267062996035003	down
chrX	91128682	91131301	2620	chrX_91128682_91131301	IAPEz-int	LTR/ERVK	LTR	ERVK	4.12928301694497	5.3037807481771	-1.17449773123214	0.0170581342083648	down
chr4	82926184	82927391	1208	chr4_82926184_82927391	L1MdTf_III	LINE/L1	LINE	L1	3.64385618977472	4.8073549220576	-1.16349873228288	0.0499546030632156	down
chr1	171624411	171627203	2793	chr1_171624411_171627203	RLTR10-int	LTR/ERVK	LTR	ERVK	4.12928301694497	5.2667865406949	-1.13750352374993	0.0201808883664408	down
chr12	116609740	116613222	3483	chr12_116609740_116613222	L1MdA_II	LINE/L1	LINE	L1	4.6724253419715	5.8073549220576	-1.13492958008611	0.00449806634222404	down
chr7	106520288	106526559	6272	chr7_106520288_106526559	L1MdA_III	LINE/L1	LINE	L1	3.95419631038688	5.08746284125034	-1.13326653086346	0.0339290917848567	down
chr3	90933534	90935804	2271	chr3_90933534_90935804	L1MdA_I	LINE/L1	LINE	L1	4.39231742277876	5.4757334309664	-1.08341600818764	0.0179258607931859	down
chr8	42244541	42250106	5566	chr8_42244541_42250106	L1MdTf_III	LINE/L1	LINE	L1	5.08746284125034	6.16992500144231	-1.08246216019197	0.00286092424624414	down
chr8	16518996	16521234	2239	chr8_16518996_16521234	L1MdA_II	LINE/L1	LINE	L1	4.61470984411521	5.68650052718322	-1.07179068306801	0.00972686799120893	down
chr6	68721231	68724193	2963	chr6_68721231_68724193	RLTR10-int	LTR/ERVK	LTR	ERVK	4.64385618977472	5.70043971814109	-1.05658352836637	0.0120010811310054	down
chr14	31882251	31884113	1863	chr14_31882251_31884113	L1MdTf_III	LINE/L1	LINE	L1	4	5.04439411935845	-1.04439411935845	0.0481130146883022	down
chr1	48413420	48417158	3739	chr1_48413420_48417158	L1MdA_III	LINE/L1	LINE	L1	4.04439411935845	5.08746284125034	-1.04306872189189	0.0457189440802982	down
chr14	54314619	54318785	4167	chr14_54314619_54318785	IAPEy-int	LTR/ERVK	LTR	ERVK	4.35755200461808	5.39231742277876	-1.03476541816068	0.0293466156273383	down
chr13	82335662	82342366	6705	chr13_82335662_82342366	L1MdTf_III	LINE/L1	LINE	L1	5.28540221886225	6.3037807481771	-1.01837852931485	0.00182863494147044	down
chr11	74005884	74010581	4698	chr11_74005884_74010581	L1MdA_III	LINE/L1	LINE	L1	4.88264304936184	5.89481776330794	-1.0121747139461	0.0109654512876091	down
chr13	102435339	102438139	2801	chr13_102435339_102438139	RLTR10-int	LTR/ERVK	LTR	ERVK	4.32192809488736	5.32192809488736	-1	0.038058614366034	down
chr8	16437446	16443624	6179	chr8_16437446_16443624	L1MdA_III	LINE/L1	LINE	L1	4.58496250072116	5.56985560833095	-0.984893107609792	0.0212113580086094	down
chr6	102925610	102930146	4537	chr6_102925610_102930146	L1MdA_III	LINE/L1	LINE	L1	4.16992500144231	5.14974711950468	-0.97982211806237	0.0498056478189358	down
chr6	12154801	12157581	2781	chr6_12154801_12157581	L1MdGf_I	LINE/L1	LINE	L1	4.4262647547021	5.37503943134692	-0.948774676644827	0.0442554745963478	down
chrX	124936585	124941198	4614	chrX_124936585_124941198	L1MdA_III	LINE/L1	LINE	L1	4.4262647547021	5.37503943134692	-0.948774676644827	0.0367918067428807	down
chr4	47099877	47102827	2951	chr4_47099877_47102827	RLTR10-int	LTR/ERVK	LTR	ERVK	4.35755200461808	5.3037807481771	-0.946228743559019	0.0447898948930048	down
chr19	8450117	8451951	1835	chr19_8450117_8451951	L1MdA_I	LINE/L1	LINE	L1	4.4262647547021	5.35755200461808	-0.931287249915986	0.0421972618125638	down
chr1	22949794	22951660	1867	chr1_22949794_22951660	L1MdA_III	LINE/L1	LINE	L1	4.35755200461808	5.28540221886225	-0.927850214244165	0.0478586128829519	down
chr12	60018750	60024684	5935	chr12_60018750_60024684	L1MdA_III	LINE/L1	LINE	L1	4.52356195605701	5.44294349584873	-0.919381539791715	0.0373855456334073	down
chr8	43971712	43977983	6272	chr8_43971712_43977983	L1MdGf_II	LINE/L1	LINE	L1	5.24792751344359	6.14974711950468	-0.901819606061097	0.00858295285952312	down
chr9	17714103	17720282	6180	chr9_17714103_17720282	L1MdA_III	LINE/L1	LINE	L1	4.4594316186373	5.35755200461808	-0.898120385980786	0.0475953525917945	down
chr2	140540144	140546607	6464	chr2_140540144_140546607	L1MdTf_III	LINE/L1	LINE	L1	5.28540221886225	6.17990909001493	-0.894506871152686	0.0084577181441411	down
chr10	92803223	92809459	6237	chr10_92803223_92809459	L1MdTf_III	LINE/L1	LINE	L1	5.79441586635011	6.67948009950545	-0.88506423315534	0.00167700561039604	down
chr1	117471551	117474542	2992	chr1_117471551_117474542	RLTR10-int	LTR/ERVK	LTR	ERVK	4.70043971814109	5.58496250072116	-0.884522782580064	0.0340326359790987	down
chr17	63125985	63133088	7104	chr17_63125985_63133088	IAPEz-int	LTR/ERVK	LTR	ERVK	6.31288295528436	7.18487534290828	-0.871992387623928	0.00022891943598222	down
chr15	93691620	93694500	2881	chr15_93691620_93694500	L1MdA_I	LINE/L1	LINE	L1	5	5.8703647195834	-0.870364719583405	0.0218602511081791	down
chrX	100981178	100984463	3286	chrX_100981178_100984463	L1MdA_II	LINE/L1	LINE	L1	4.64385618977472	5.5077946401987	-0.863938450423972	0.0442010006197888	down
chr1	96982239	96986994	4756	chr1_96982239_96986994	L1MdA_III	LINE/L1	LINE	L1	4.70043971814109	5.55458885167764	-0.854149133536546	0.0423436201988287	down
chr13	17228948	17232758	3811	chr13_17228948_17232758	L1MdA_III	LINE/L1	LINE	L1	4.6724253419715	5.52356195605701	-0.851136614085518	0.0497125845528475	down
chr5	138024277	138030755	6479	chr5_138024277_138030755	L1MdGf_II	LINE/L1	LINE	L1	5.20945336562895	6.05528243550119	-0.84582906987224	0.0200874134173296	down
chr13	88494245	88500406	6162	chr13_88494245_88500406	L1MdA_III	LINE/L1	LINE	L1	4.7279204545632	5.56985560833095	-0.841935153767749	0.0440614857723264	down
chr19	31837635	31841898	4264	chr19_31837635_31841898	L1MdA_I	LINE/L1	LINE	L1	5.12928301694497	5.96578428466209	-0.836501267717121	0.0239033263058156	down
chr16	58372335	58375910	3576	chr16_58372335_58375910	L1MdA_I	LINE/L1	LINE	L1	5.06608919045777	5.89481776330794	-0.828728572850172	0.0277336199587038	down
chr13	25318988	25323002	4015	chr13_25318988_25323002	L1MdA_III	LINE/L1	LINE	L1	5.2667865406949	6.08746284125034	-0.820676300555438	0.0169256383840895	down
chr4	30879840	30886062	6223	chr4_30879840_30886062	L1MdTf_III	LINE/L1	LINE	L1	5.12928301694497	5.94251450533924	-0.813231488394274	0.0250463702765808	down
chr18	59296614	59299341	2728	chr18_59296614_59299341	L1MdA_III	LINE/L1	LINE	L1	4.83289001416474	5.64385618977472	-0.810966175609983	0.04418730973682	down
chr7	11054281	11058647	4367	chr7_11054281_11058647	IAPEz-int	LTR/ERVK	LTR	ERVK	6.09803208296053	6.89481776330794	-0.796785680347417	0.00229043047802348	down
chr1	125355553	125362777	7225	chr1_125355553_125362777	L1MdA_II	LINE/L1	LINE	L1	6.16992500144231	6.96578428466209	-0.795859283219775	0.00446421708511284	down
chr7	119112134	119116496	4363	chr7_119112134_119116496	IAPEz-int	LTR/ERVK	LTR	ERVK	5.98868468677217	6.77478705960117	-0.786102372829008	0.00426567441155644	down
chr3	17649278	17655523	6246	chr3_17649278_17655523	L1MdTf_III	LINE/L1	LINE	L1	5.68650052718322	6.467605550083	-0.781105022899779	0.00979757852545691	down
chr6	65417755	65419912	2158	chr6_65417755_65419912	L1MdTf_II	LINE/L1	LINE	L1	4.95419631038687	5.7279204545632	-0.773724144176324	0.0463151437261908	down
chr9	106918440	106924729	6290	chr9_106918440_106924729	L1MdGf_II	LINE/L1	LINE	L1	5.16992500144231	5.94251450533924	-0.772589503896928	0.0344497862990025	down
chrX	39360921	39366009	5089	chrX_39360921_39366009	L1MdA_II	LINE/L1	LINE	L1	5.4093909361377	6.17990909001493	-0.770518153877233	0.0249920634843408	down
chr1	27270337	27276738	6402	chr1_27270337_27276738	L1MdA_III	LINE/L1	LINE	L1	5.20945336562895	5.97727992349992	-0.767826557870967	0.0333064733323295	down
chr1	44722370	44728851	6482	chr1_44722370_44728851	L1MdTf_III	LINE/L1	LINE	L1	6.09803208296053	6.86418614465428	-0.766154061693754	0.00351193671305441	down
chr4	28618374	28624659	6286	chr4_28618374_28624659	L1MdGf_II	LINE/L1	LINE	L1	5.3037807481771	6.06608919045777	-0.762308442280669	0.0272173712943661	down
chr5	7525494	7531926	6433	chr5_7525494_7531926	MERVL-int	LTR/ERVL	LTR	ERVL	6.24792751344359	7.00562454919388	-0.757697035750293	0.00239878607681309	down
chr15	64523320	64529337	6018	chr15_64523320_64529337	L1MdA_III	LINE/L1	LINE	L1	5.14974711950468	5.90689059560852	-0.757143476103836	0.0423394940864928	down
chr3	137281597	137285909	4313	chr3_137281597_137285909	IAPEz-int	LTR/ERVK	LTR	ERVK	5.93073733756289	6.67948009950545	-0.74874276194256	0.00743883184097761	down
chr5	81449738	81454545	4808	chr5_81449738_81454545	L1MdA_II	LINE/L1	LINE	L1	5.8073549220576	6.55458885167764	-0.747233929620034	0.0103403673562106	down
chr18	9202502	9208706	6205	chr18_9202502_9208706	L1MdTf_III	LINE/L1	LINE	L1	5.83289001416474	6.57742882803575	-0.744538813871007	0.0100661131012483	down
chr9	11134331	11140959	6629	chr9_11134331_11140959	L1MdTf_III	LINE/L1	LINE	L1	5.61470984411521	6.35755200461808	-0.742842160502875	0.0195179843081642	down
chr10	11525057	11531554	6498	chr10_11525057_11531554	L1MdTf_I	LINE/L1	LINE	L1	5.3037807481771	6.04439411935845	-0.74061337118135	0.0375181534748347	down
chr6	49527756	49534067	6312	chr6_49527756_49534067	L1MdA_III	LINE/L1	LINE	L1	5.8073549220576	6.53915881110803	-0.731803889050427	0.0118184733766474	down
chr15	25245962	25252113	6152	chr15_25245962_25252113	L1MdA_III	LINE/L1	LINE	L1	5.2667865406949	5.98868468677217	-0.721898146077264	0.0380367010352826	down
chr12	50402627	50409170	6544	chr12_50402627_50409170	L1MdGf_I	LINE/L1	LINE	L1	5.4594316186373	6.17990909001493	-0.720477471377637	0.027088735882981	down
chr12	49076319	49082727	6409	chr12_49076319_49082727	L1MdTf_III	LINE/L1	LINE	L1	5.78135971352466	6.49984588708321	-0.718486173558546	0.0139794998602411	down
chr17	57652169	57659299	7131	chr17_57652169_57659299	L1MdTf_II	LINE/L1	LINE	L1	6.53915881110803	7.25738784269265	-0.718229031584621	0.00228967274852572	down
chr10	113920039	113920492	454	chr10_113920039_113920492	B1_Mus1	SINE/Alu	SINE	Alu	5.18982455888002	5.90689059560852	-0.717066036728501	0.0490045429002892	down
chr8	37997452	38001876	4425	chr8_37997452_38001876	L1MdTf_III	LINE/L1	LINE	L1	5.22881869049588	5.94251450533924	-0.713695814843359	0.0480904560822485	down
chr1	100635843	100642548	6706	chr1_100635843_100642548	L1MdA_II	LINE/L1	LINE	L1	5.6724253419715	6.38370429247405	-0.711278950502557	0.0202071122127364	down
chr9	80588623	80595011	6389	chr9_80588623_80595011	L1MdA_III	LINE/L1	LINE	L1	5.4594316186373	6.16992500144231	-0.710493382805015	0.038030112583648	down
chr5	133949442	133954807	5366	chr5_133949442_133954807	IAPEz-int	LTR/ERVK	LTR	ERVK	6.4093909361377	7.11374216604919	-0.704351229911486	0.00326073316463749	down
chr10	9847032	9851789	4758	chr10_9847032_9851789	IAPEz-int	LTR/ERVK	LTR	ERVK	6.12928301694497	6.83289001416474	-0.703606997219775	0.00732815203636924	down
chr17	41687268	41693285	6018	chr17_41687268_41693285	L1MdGf_II	LINE/L1	LINE	L1	5.37503943134692	6.07681559705083	-0.701776165703906	0.0401763637649469	down
chr10	63741650	63747983	6334	chr10_63741650_63747983	L1MdTf_III	LINE/L1	LINE	L1	5.90689059560852	6.60733031374961	-0.700439718141092	0.0134672998360323	down
chr4	69646401	69649709	3309	chr4_69646401_69649709	L1MdTf_I	LINE/L1	LINE	L1	5.4093909361377	6.10852445677817	-0.699133520640467	0.0362794775036655	down
chr13	104991220	104996832	5613	chr13_104991220_104996832	IAPEz-int	LTR/ERVK	LTR	ERVK	6.14974711950468	6.84549005094437	-0.695742931439693	0.00706655652186409	down
chr1	68583019	68589691	6673	chr1_68583019_68589691	L1MdTf_III	LINE/L1	LINE	L1	6.08746284125034	6.78135971352466	-0.693896872274321	0.0108013377841536	down
chrX	158600808	158607271	6464	chrX_158600808_158607271	L1MdTf_II	LINE/L1	LINE	L1	6.17990909001493	6.8703647195834	-0.69045562956847	0.00842984602896604	down
chr1	22092292	22098472	6181	chr1_22092292_22098472	L1MdA_III	LINE/L1	LINE	L1	5.44294349584873	6.12928301694497	-0.686339521096238	0.0388930704907445	down
chrX	165869653	165873995	4343	chrX_165869653_165873995	IAPEz-int	LTR/ERVK	LTR	ERVK	5.6724253419715	6.35755200461808	-0.685126662646589	0.0242754430308274	down
chr12	58487355	58493614	6260	chr12_58487355_58493614	L1MdTf_III	LINE/L1	LINE	L1	5.8073549220576	6.49185309632967	-0.684498174272071	0.0184983134885553	down
chr12	96230159	96234532	4374	chr12_96230159_96234532	IAPEz-int	LTR/ERVK	LTR	ERVK	6.19967234483636	6.88264304936184	-0.682970704525477	0.0309710670798747	down
chr16	75634661	75641807	7147	chr16_75634661_75641807	IAPEz-int	LTR/ERVK	LTR	ERVK	6.56985560833095	7.25266543245025	-0.682809824119301	0.00254943788749531	down
chr14	71621169	71627533	6365	chr14_71621169_71627533	L1MdA_I	LINE/L1	LINE	L1	6.13955135239879	6.82017896241519	-0.680627610016394	0.0105067673997204	down
chr6	143505735	143512993	7259	chr6_143505735_143512993	IAPEz-int	LTR/ERVK	LTR	ERVK	6.61470984411521	7.29462074889163	-0.679910904776419	0.00213568165155005	down
chr3	49071027	49077312	6286	chr3_49071027_49077312	L1MdTf_III	LINE/L1	LINE	L1	5.68650052718322	6.36632221424582	-0.679821687062597	0.0254311055311023	down
chr14	82178207	82182027	3821	chr14_82178207_82182027	IAPEz-int	LTR/ERVK	LTR	ERVK	6.05528243550119	6.73470962022584	-0.679427184724648	0.0109016041559692	down
chr9	36071234	36077316	6083	chr9_36071234_36077316	L1MdA_II	LINE/L1	LINE	L1	5.56985560833095	6.24792751344359	-0.678071905112637	0.0387141164609431	down
chr3	156177987	156182556	4570	chr3_156177987_156182556	IAPEz-int	LTR/ERVK	LTR	ERVK	6.14974711950468	6.82654848729092	-0.676801367786233	0.00931721469646702	down
chr3	81071249	81077613	6365	chr3_81071249_81077613	L1MdTf_II	LINE/L1	LINE	L1	6.04439411935845	6.72109918870718	-0.676705069348731	0.0402643064227361	down
chr6	61508135	61512535	4401	chr6_61508135_61512535	IAPEz-int	LTR/ERVK	LTR	ERVK	5.98868468677217	6.66533591718518	-0.676651230413011	0.0145923109042012	down
chr12	15055130	15061369	6240	chr12_15055130_15061369	L1MdTf_III	LINE/L1	LINE	L1	5.52356195605701	6.19967234483636	-0.676110388779351	0.0360730874412042	down
chr3	83543550	83548570	5021	chr3_83543550_83548570	L1MdA_I	LINE/L1	LINE	L1	5.62935662007961	6.3037807481771	-0.674424128097494	0.0302456304800142	down
chr15	65399829	65406217	6389	chr15_65399829_65406217	L1MdA_II	LINE/L1	LINE	L1	5.85798099512757	6.53138146051631	-0.67340046538874	0.0183063437336368	down
chr1	145174352	145179016	4665	chr1_145174352_145179016	L1MdGf_I	LINE/L1	LINE	L1	5.53915881110803	6.20945336562895	-0.670294554520919	0.0372739510418012	down
chr13	5141325	5147496	6172	chr13_5141325_5147496	L1MdA_I	LINE/L1	LINE	L1	6.01122725542325	6.67948009950545	-0.668252844082192	0.0150412380917217	down
chrX	67031761	67037672	5912	chrX_67031761_67037672	L1MdTf_II	LINE/L1	LINE	L1	5.95419631038687	6.62205181945638	-0.667855509069502	0.019817920596304	down
chrX	156949111	156955495	6385	chrX_156949111_156955495	L1MdTf_I	LINE/L1	LINE	L1	5.97727992349992	6.64385618977472	-0.666576266274808	0.0148519386419566	down
chr1	62099945	62105676	5732	chr1_62099945_62105676	L1MdTf_II	LINE/L1	LINE	L1	5.5077946401987	6.16992500144231	-0.662130361243616	0.0475409661847631	down
chr13	84105822	84111817	5996	chr13_84105822_84111817	L1MdA_III	LINE/L1	LINE	L1	5.4262647547021	6.08746284125034	-0.661198086548241	0.0490195812718171	down
chr12	98483425	98489324	5900	chr12_98483425_98489324	L1MdTf_III	LINE/L1	LINE	L1	5.8073549220576	6.467605550083	-0.660250628025394	0.0279483619758962	down
chr5	20364079	20370500	6422	chr5_20364079_20370500	L1MdTf_II	LINE/L1	LINE	L1	6.24792751344359	6.90689059560852	-0.658963082164933	0.00997638602144765	down
chr6	43799382	43805782	6401	chr6_43799382_43805782	L1MdA_II	LINE/L1	LINE	L1	5.91886323727459	6.57742882803575	-0.658565590761154	0.0201365394645783	down
chr8	77864673	77868866	4194	chr8_77864673_77868866	L1MdTf_II	LINE/L1	LINE	L1	5.52356195605701	6.17990909001493	-0.656347133957921	0.0432147383151024	down
chr2	50600410	50606871	6462	chr2_50600410_50606871	L1MdTf_III	LINE/L1	LINE	L1	5.78135971352466	6.43462822763672	-0.653268514112065	0.0260992763181991	down
chr11	28347409	28353805	6397	chr11_28347409_28353805	L1MdTf_II	LINE/L1	LINE	L1	5.97727992349992	6.62935662007961	-0.652076696579693	0.0208929111405449	down
chr17	73856148	73863317	7170	chr17_73856148_73863317	IAPEz-int	LTR/ERVK	LTR	ERVK	6.98299357469431	7.63299519714296	-0.650001622448648	0.00101177873613703	down
chr13	103582174	103588483	6310	chr13_103582174_103588483	L1MdTf_III	LINE/L1	LINE	L1	5.76818432477693	6.4178525148859	-0.649668190108972	0.0316637362881288	down
chrX	25932751	25939198	6448	chrX_25932751_25939198	L1MdTf_III	LINE/L1	LINE	L1	5.4594316186373	6.10852445677817	-0.649092838140872	0.0488318936468745	down
chr14	38536026	38543309	7284	chr14_38536026_38543309	L1MdGf_I	LINE/L1	LINE	L1	6.94836723158468	7.59618975614441	-0.647822524559732	0.00770799388994386	down
chr9	25752202	25758850	6649	chr9_25752202_25758850	L1MdTf_III	LINE/L1	LINE	L1	6.14974711950468	6.79441586635011	-0.644668746845424	0.0129156442549337	down
chr4	87502988	87509403	6416	chr4_87502988_87509403	L1MdA_II	LINE/L1	LINE	L1	5.8073549220576	6.45121111183233	-0.643856189774725	0.0317153396313545	down
chr6	60259306	60265779	6474	chr6_60259306_60265779	L1MdTf_III	LINE/L1	LINE	L1	6.18982455888002	6.83289001416474	-0.643065455284724	0.0118436119305432	down
chr7	142214896	142220743	5848	chr7_142214896_142220743	IAPEz-int	LTR/ERVK	LTR	ERVK	6.85798099512757	7.49984588708321	-0.641864891955634	0.00370244128342426	down
chr15	7273468	7279700	6233	chr15_7273468_7279700	L1MdTf_III	LINE/L1	LINE	L1	5.96578428466209	6.60733031374961	-0.641546029087523	0.026333811327039	down
chr13	85039551	85045786	6236	chr13_85039551_85045786	L1MdTf_III	LINE/L1	LINE	L1	5.53915881110803	6.17990909001493	-0.640750278906904	0.0458331598882143	down
chr16	79728633	79735079	6447	chr16_79728633_79735079	L1MdTf_II	LINE/L1	LINE	L1	6.38370429247405	7.02236781302845	-0.638663520554402	0.00816246052876895	down
chr13	87063878	87071060	7183	chr13_87063878_87071060	IAPEz-int	LTR/ERVK	LTR	ERVK	6.99435343685886	7.63299519714296	-0.6386417602841	0.00145853685899248	down
chrX	121550119	121557363	7245	chrX_121550119_121557363	IAPEz-int	LTR/ERVK	LTR	ERVK	6.62935662007961	7.2667865406949	-0.637429920615292	0.00394506946993564	down
chr4	91972433	91979517	7085	chr4_91972433_91979517	IAPEz-int	LTR/ERVK	LTR	ERVK	7.0389189892923	7.67595703294175	-0.637038043649447	0.00144525173659603	down
chr1	37773885	37778597	4713	chr1_37773885_37778597	IAPEz-int	LTR/ERVK	LTR	ERVK	6.27612440527424	6.91288933622996	-0.636764930955724	0.0135528538458194	down
chr3	69618247	69622807	4561	chr3_69618247_69622807	IAPEz-int	LTR/ERVK	LTR	ERVK	6.18982455888002	6.82654848729092	-0.636723928410897	0.0128242262859738	down
chr11	86845643	86850157	4515	chr11_86845643_86850157	IAPEz-int	LTR/ERVK	LTR	ERVK	6.09803208296053	6.73470962022584	-0.636677537265312	0.0243919574476236	down
chrX	114890010	114894538	4529	chrX_114890010_114894538	IAPEz-int	LTR/ERVK	LTR	ERVK	5.83289001416474	6.467605550083	-0.634715535918256	0.0398770354541931	down
chr8	67186239	67192446	6208	chr8_67186239_67192446	L1MdA_II	LINE/L1	LINE	L1	5.71424551766612	6.34872815423108	-0.634482636564955	0.0402037311406283	down
chr7	40459731	40465903	6173	chr7_40459731_40465903	L1MdTf_III	LINE/L1	LINE	L1	5.88264304936184	6.51569983828404	-0.633056788922201	0.0343412149871552	down
chr7	107301807	107308067	6261	chr7_107301807_107308067	L1MdGf_II	LINE/L1	LINE	L1	5.64385618977472	6.27612440527424	-0.632268215499513	0.0423404233805692	down
chr5	86450329	86456570	6242	chr5_86450329_86456570	L1MdTf_III	LINE/L1	LINE	L1	5.6724253419715	6.3037807481771	-0.631355406205608	0.042804398764302	down
chr9	36394071	36400509	6439	chr9_36394071_36400509	L1MdTf_III	LINE/L1	LINE	L1	6.27612440527424	6.90689059560852	-0.630766190334281	0.0118827048532106	down
chr5	12249646	12253990	4345	chr5_12249646_12253990	IAPEz-int	LTR/ERVK	LTR	ERVK	6.20945336562895	6.83920378809694	-0.629750422467994	0.0143282589843706	down
chr1	55778362	55783280	4919	chr1_55778362_55783280	IAPEz-int	LTR/ERVK	LTR	ERVK	6.56224242422107	7.18982455888002	-0.627582134658945	0.00699540833845619	down
chr17	37876653	37882944	6292	chr17_37876653_37882944	MERVL-int	LTR/ERVL	LTR	ERVL	6.66533591718518	7.28540221886225	-0.620066301677072	0.00506532834148135	down
chr7	6075172	6081501	6330	chr7_6075172_6081501	L1MdTf_III	LINE/L1	LINE	L1	5.94251450533924	6.56224242422107	-0.619727918881833	0.0298278189791456	down
chr16	82583471	82590599	7129	chr16_82583471_82590599	IAPEz-int	LTR/ERVK	LTR	ERVK	7.18487534290828	7.80413102118332	-0.619255678275034	0.000966200338327676	down
chrX	42632954	42639128	6175	chrX_42632954_42639128	L1MdTf_II	LINE/L1	LINE	L1	6.14974711950468	6.76818432477693	-0.618437205272244	0.0179515397941094	down
chr13	87556307	87562042	5736	chr13_87556307_87562042	IAPEz-int	LTR/ERVK	LTR	ERVK	6.6724253419715	7.29001884693262	-0.617593504961123	0.00482776821385055	down
chr5	6483432	6492278	8847	chr5_6483432_6492278	RLTR6-int	LTR/ERV1	LTR	ERV1	6.18982455888002	6.8073549220576	-0.617530363177586	0.0202537365498233	down
chr5	17042949	17049253	6305	chr5_17042949_17049253	L1MdTf_III	LINE/L1	LINE	L1	6.05528243550119	6.6724253419715	-0.617142906470305	0.0258929055805602	down
chr18	10230065	10236230	6166	chr18_10230065_10236230	L1MdA_III	LINE/L1	LINE	L1	5.79441586635011	6.4093909361377	-0.614975069787596	0.0376554125724336	down
chr1	30370800	30377807	7008	chr1_30370800_30377807	L1MdA_II	LINE/L1	LINE	L1	6.15987133677839	6.77478705960117	-0.614915722822785	0.0224439298255549	down
chr17	8692342	8697034	4693	chr17_8692342_8697034	IAPEz-int	LTR/ERVK	LTR	ERVK	5.6724253419715	6.28540221886225	-0.612976876890754	0.0467592597757853	down
chr8	65184870	65191178	6309	chr8_65184870_65191178	L1MdTf_III	LINE/L1	LINE	L1	6.10852445677817	6.72109918870718	-0.612574731929016	0.0204988797842743	down
chrX	152478510	152485488	6979	chrX_152478510_152485488	L1MdTf_II	LINE/L1	LINE	L1	6.76818432477693	7.37503943134692	-0.606855106569999	0.00428074358179875	down
chr2	48578897	48585617	6721	chr2_48578897_48585617	L1MdTf_II	LINE/L1	LINE	L1	6.66533591718518	7.27146302790437	-0.606127110719198	0.00621430600854575	down
chr17	68528869	68535246	6378	chr17_68528869_68535246	L1MdA_II	LINE/L1	LINE	L1	6.16992500144231	6.77478705960117	-0.604862058158862	0.0215329185335805	down
chr2	109097798	109104160	6363	chr2_109097798_109104160	L1MdA_I	LINE/L1	LINE	L1	6.16992500144231	6.77478705960117	-0.604862058158862	0.0214965546772997	down
chr13	110309504	110316175	6672	chr13_110309504_110316175	L1MdTf_III	LINE/L1	LINE	L1	6.2667865406949	6.8703647195834	-0.603578178888504	0.0169084688139966	down
chr5	136155679	136160205	4527	chr5_136155679_136160205	IAPEz-int	LTR/ERVK	LTR	ERVK	6.03342300153745	6.63662462054365	-0.603201619006199	0.0324699518620143	down
chr17	77920489	77925469	4981	chr17_77920489_77925469	IAPEz-int	LTR/ERVK	LTR	ERVK	6.32192809488736	6.92481250360578	-0.602884408718419	0.0145540403592477	down
chr3	68724828	68731935	7108	chr3_68724828_68731935	L1MdGf_I	LINE/L1	LINE	L1	6.78135971352466	7.38370429247405	-0.602344578949392	0.00456190966459113	down
chr1	10729881	10736998	7118	chr1_10729881_10736998	IAPEz-int	LTR/ERVK	LTR	ERVK	7.0389189892923	7.64024493622235	-0.601325946930044	0.00311171844945419	down
chr6	31907399	31911744	4346	chr6_31907399_31911744	IAPEz-int	LTR/ERVK	LTR	ERVK	5.95419631038687	6.55458885167764	-0.600392541290763	0.0369535594545991	down
chr3	17383578	17389844	6267	chr3_17383578_17389844	L1MdTf_II	LINE/L1	LINE	L1	5.97727992349992	6.57742882803575	-0.600148904535832	0.0358810818689365	down
chr13	32350446	32357656	7211	chr13_32350446_32357656	IAPEz-int	LTR/ERVK	LTR	ERVK	7.1548181090521	7.7515440590891	-0.596725950036994	0.00186740338311418	down
chr17	92517016	92523368	6353	chr17_92517016_92523368	L1MdA_II	LINE/L1	LINE	L1	5.83289001416474	6.4262647547021	-0.593374740537357	0.04341580170219	down
chr4	60406875	60414412	7538	chr4_60406875_60414412	IAPEz-int	LTR/ERVK	LTR	ERVK	6.85798099512757	7.45121111183233	-0.593230116704757	0.00465444432900772	down
chr7	4276857	4281273	4417	chr7_4276857_4281273	IAPEz-int	LTR/ERVK	LTR	ERVK	5.95419631038687	6.54689445988764	-0.592698149500761	0.0381378503966366	down
chr5	119898472	119905638	7167	chr5_119898472_119905638	IAPEz-int	LTR/ERVK	LTR	ERVK	7.12928301694497	7.72109918870718	-0.591816171762218	0.00249901356718963	down
chr1	159021826	159028678	6853	chr1_159021826_159028678	L1MdTf_III	LINE/L1	LINE	L1	6.14974711950468	6.74146698640115	-0.591719866896465	0.0265743859564693	down
chr11	47419241	47427867	8627	chr11_47419241_47427867	RLTR6-int	LTR/ERV1	LTR	ERV1	6.16992500144231	6.76155123244448	-0.591626231002167	0.0283788205551119	down
chr15	94057446	94062447	5002	chr15_94057446_94062447	IAPEz-int	LTR/ERVK	LTR	ERVK	6.24792751344359	6.83920378809694	-0.591276274653358	0.0211931853853083	down
chr7	62840092	62845198	5107	chr7_62840092_62845198	IAPEz-int	LTR/ERVK	LTR	ERVK	6.3037807481771	6.89481776330794	-0.591037015130841	0.0184912236233987	down
chr15	60800945	60808348	7404	chr15_60800945_60808348	IAPEz-int	LTR/ERVK	LTR	ERVK	7.07146236255662	7.66177809777199	-0.590315735215363	0.00243671096736482	down
chr17	40535144	40542252	7109	chr17_40535144_40542252	L1MdTf_III	LINE/L1	LINE	L1	5.94251450533924	6.53138146051631	-0.588866955177072	0.0445599537204067	down
chr3	157006743	157013119	6377	chr3_157006743_157013119	L1MdA_II	LINE/L1	LINE	L1	5.98868468677217	6.57742882803575	-0.588744141263583	0.037241638589408	down
chr7	88632696	88637544	4849	chr7_88632696_88637544	IAPEz-int	LTR/ERVK	LTR	ERVK	6.05528243550119	6.64385618977472	-0.588573754273535	0.0301680531984352	down
chr14	95214863	95221208	6346	chr14_95214863_95221208	L1MdA_I	LINE/L1	LINE	L1	6.13955135239879	6.7279204545632	-0.588369102164405	0.0299407683981555	down
chr8	112645339	112651943	6605	chr8_112645339_112651943	L1MdA_II	LINE/L1	LINE	L1	6.17990909001493	6.76818432477693	-0.588275234761992	0.0279105260480632	down
chr4	52186999	52191454	4456	chr4_52186999_52191454	IAPEz-int	LTR/ERVK	LTR	ERVK	5.83289001416474	6.4178525148859	-0.584962500721157	0.049036017202695	down
chr1	99345569	99351959	6391	chr1_99345569_99351959	L1MdA_I	LINE/L1	LINE	L1	6.37503943134692	6.96000193206808	-0.584962500721156	0.0165893421555985	down
chr10	66462440	66469026	6587	chr10_66462440_66469026	L1MdTf_II	LINE/L1	LINE	L1	6.39231742277876	6.97727992349992	-0.584962500721156	0.0162219964214372	down
chr15	69213342	69218372	5031	chr15_69213342_69218372	L1MdTf_I	LINE/L1	LINE	L1	5.85798099512757	6.44294349584873	-0.584962500721156	0.0433906657496937	down
chr8	17637532	17643914	6383	chr8_17637532_17643914	L1MdA_II	LINE/L1	LINE	L1	5.88264304936184	6.467605550083	-0.584962500721156	0.0480407507617094	down
chr17	72615262	72619748	4487	chr17_72615262_72619748	IAPEz-int	LTR/ERVK	LTR	ERVK	6.59991284218713	7.18487534290828	-0.584962500721156	0.0103281772326106	down
chr7	48632726	48639819	7094	chr7_48632726_48639819	L1MdGf_I	LINE/L1	LINE	L1	6.82654848729092	7.4093909361377	-0.582842448846787	0.00755106944984917	down
chrX	115414522	115421019	6498	chrX_115414522_115421019	L1MdTf_III	LINE/L1	LINE	L1	6.31288295528436	6.89481776330794	-0.581934808023588	0.0248251816776713	down
chr13	83180728	83187329	6602	chr13_83180728_83187329	L1MdA_II	LINE/L1	LINE	L1	6.09803208296053	6.67948009950545	-0.58144801654492	0.0303347975612732	down
chr17	33414337	33421506	7170	chr17_33414337_33421506	L1MdTf_III	LINE/L1	LINE	L1	5.96578428466209	6.54689445988764	-0.581110175225549	0.0374684725110738	down
chr8	98429127	98435466	6340	chr8_98429127_98435466	L1MdTf_III	LINE/L1	LINE	L1	5.8703647195834	6.45121111183233	-0.580846392248924	0.0460222002412037	down
chr3	86153187	86159551	6365	chr3_86153187_86159551	L1MdA_I	LINE/L1	LINE	L1	6.17990909001493	6.75488750216347	-0.574978412148534	0.0342951488722123	down
chrX	49425064	49432729	7666	chrX_49425064_49432729	L1MdA_II	LINE/L1	LINE	L1	6.53915881110803	7.11374216604919	-0.574583354941157	0.0126152427462605	down
chr10	30813994	30821083	7090	chr10_30813994_30821083	IAPEz-int	LTR/ERVK	LTR	ERVK	7.09803208296053	7.6724253419715	-0.574393259010969	0.00826172127339057	down
chr1	103205166	103212290	7125	chr1_103205166_103212290	IAPEz-int	LTR/ERVK	LTR	ERVK	7.23840473932508	7.81057163474115	-0.572166895416069	0.00305939313450665	down
chr5	68137205	68144008	6804	chr5_68137205_68144008	L1MdA_II	LINE/L1	LINE	L1	6.53138146051631	7.10328780841202	-0.57190634789571	0.0168575034940819	down
chr4	19663754	19670316	6563	chr4_19663754_19670316	L1MdA_I	LINE/L1	LINE	L1	6.49984588708321	7.07146236255662	-0.571616475473419	0.014371371909475	down
chr16	41490901	41495224	4324	chr16_41490901_41495224	IAPEz-int	LTR/ERVK	LTR	ERVK	6.4178525148859	6.98868468677217	-0.570832171886267	0.0190429667186794	down
chrX	100108074	100115079	7006	chrX_100108074_100115079	L1MdA_I	LINE/L1	LINE	L1	6.64385618977472	7.21431912080077	-0.570462931026041	0.0108430293555417	down
chr8	106486631	106493432	6802	chr8_106486631_106493432	IAPEz-int	LTR/ERVK	LTR	ERVK	7.04439411935845	7.61470984411521	-0.570315724756755	0.00419645966460337	down
chr11	16228393	16232795	4403	chr11_16228393_16232795	IAPEz-int	LTR/ERVK	LTR	ERVK	6.02236781302845	6.59245703726808	-0.570089224239626	0.0392852125287537	down
chr5	45395427	45399944	4518	chr5_45395427_45399944	IAPEz-int	LTR/ERVK	LTR	ERVK	6.27612440527424	6.84549005094437	-0.569365645670137	0.0247611972972888	down
chr13	60196698	60203890	7193	chr13_60196698_60203890	IAPEz-int	LTR/ERVK	LTR	ERVK	7.11374216604919	7.68299458368168	-0.569252417632495	0.00289982897932644	down
chr3	58852153	58858944	6792	chr3_58852153_58858944	L1MdA_I	LINE/L1	LINE	L1	6.62205181945638	7.18982455888002	-0.567772739423641	0.0122761975238606	down
chr12	76735778	76744531	8754	chr12_76735778_76744531	RLTR6-int	LTR/ERV1	LTR	ERV1	6.11894107272351	6.68650052718322	-0.567559454459711	0.0328017991454469	down
chr7	65260088	65266557	6470	chr7_65260088_65266557	MERVL-int	LTR/ERVL	LTR	ERVL	6.03342300153745	6.59991284218713	-0.566489840649678	0.0410555912566274	down
chrX	70264112	70270869	6758	chrX_70264112_70270869	L1MdA_I	LINE/L1	LINE	L1	6.48381577726426	7.04984854945056	-0.566032772186305	0.0191113322418668	down
chr13	111062257	111067736	5480	chr13_111062257_111067736	L1MdTf_I	LINE/L1	LINE	L1	5.94251450533924	6.5077946401987	-0.565280134859456	0.0487780274961416	down
chr1	16947009	16953910	6902	chr1_16947009_16953910	L1MdGf_I	LINE/L1	LINE	L1	6.55458885167764	7.11894107272351	-0.56435222104587	0.0165997101631174	down
chr11	37633903	37640266	6364	chr11_37633903_37640266	L1MdA_I	LINE/L1	LINE	L1	6.31288295528436	6.876516946565	-0.563633991280644	0.0276997861679921	down
chr7	85097063	85101711	4649	chr7_85097063_85101711	IAPEz-int	LTR/ERVK	LTR	ERVK	6.44294349584873	7.00562454919388	-0.56268105334515	0.0228364457330508	down
chr11	11611541	11618096	6556	chr11_11611541_11618096	L1MdA_I	LINE/L1	LINE	L1	6.4262647547021	6.98868468677217	-0.562419932070068	0.0207762447935792	down
chr7	39778075	39782588	4514	chr7_39778075_39782588	IAPEz-int	LTR/ERVK	LTR	ERVK	6.21916852046216	6.78135971352466	-0.562191193062499	0.029496739777603	down
chr16	53647820	53654563	6744	chr16_53647820_53654563	L1MdTf_III	LINE/L1	LINE	L1	6.39231742277876	6.95419631038687	-0.561878887608114	0.0202079721435859	down
chr8	51923152	51930362	7211	chr8_51923152_51930362	IAPEz-int	LTR/ERVK	LTR	ERVK	6.98299357469431	7.54303182025524	-0.560038245560928	0.00694570850856143	down
chr12	49192726	49199463	6738	chr12_49192726_49199463	L1MdGf_I	LINE/L1	LINE	L1	6.2667865406949	6.82654848729092	-0.559761946596014	0.0293421605006405	down
chr1	56458635	56464845	6211	chr1_56458635_56464845	L1MdTf_II	LINE/L1	LINE	L1	6.05528243550119	6.61470984411521	-0.559427408614019	0.041125356211874	down
chr1	93956583	93961295	4713	chr1_93956583_93961295	IAPEz-int	LTR/ERVK	LTR	ERVK	6.4178525148859	6.97727992349992	-0.559427408614019	0.0205139328947848	down
chr2	88705058	88711581	6524	chr2_88705058_88711581	L1MdTf_I	LINE/L1	LINE	L1	6.40087943628218	6.96000193206808	-0.559122495785896	0.0272196965640149	down
chr8	129138669	129145302	6634	chr8_129138669_129145302	L1MdTf_III	LINE/L1	LINE	L1	6.18982455888002	6.74819284958946	-0.558368290709443	0.0319272698878833	down
chr12	62541755	62549877	8123	chr12_62541755_62549877	L1MdTf_I	LINE/L1	LINE	L1	6.88874324889826	7.44708322620965	-0.558339977311393	0.00658730995531684	down
chrX	168176613	168181616	5004	chrX_168176613_168181616	IAPEz-int	LTR/ERVK	LTR	ERVK	5.98868468677217	6.54689445988764	-0.558209773115471	0.0450620929653425	down
chr12	98355234	98362340	7107	chr12_98355234_98362340	IAPEz-int	LTR/ERVK	LTR	ERVK	7.07146236255662	7.62935662007961	-0.557894257522985	0.00479447398876446	down
chr7	109366013	109372211	6199	chr7_109366013_109372211	L1MdTf_III	LINE/L1	LINE	L1	6.12928301694497	6.68650052718322	-0.557217510238252	0.0454301434957745	down
chr8	50996116	51000749	4634	chr8_50996116_51000749	IAPEz-int	LTR/ERVK	LTR	ERVK	6.29462074889163	6.85174904141606	-0.55712829252443	0.0339232221236986	down
chr12	97819854	97827361	7508	chr12_97819854_97827361	L1MdGf_I	LINE/L1	LINE	L1	7.19967234483636	7.75488750216347	-0.555215157327104	0.00376264393221041	down
chr1	79550145	79556361	6217	chr1_79550145_79556361	L1MdTf_III	LINE/L1	LINE	L1	6.02236781302845	6.57742882803575	-0.555061015007294	0.0437764146958577	down
chr6	132556130	132561095	4966	chr6_132556130_132561095	IAPEz-int	LTR/ERVK	LTR	ERVK	6.43462822763672	6.98868468677217	-0.554056459135441	0.0208476623728795	down
chr9	88129598	88136034	6437	chr9_88129598_88136034	L1MdTf_II	LINE/L1	LINE	L1	6.05528243550119	6.60733031374961	-0.552047878248421	0.0436842470688577	down
chr14	58325663	58331647	5985	chr14_58325663_58331647	L1MdTf_II	LINE/L1	LINE	L1	6.33091687811462	6.88264304936184	-0.551726171247225	0.0272148437074622	down
chr5	51000866	51008041	7176	chr5_51000866_51008041	IAPEz-int	LTR/ERVK	LTR	ERVK	7.10328780841202	7.65463602852797	-0.551348220115946	0.00488744877975071	down
chrX	18767014	18771105	4092	chrX_18767014_18771105	IAPEz-int	LTR/ERVK	LTR	ERVK	6.16992500144231	6.72109918870718	-0.551174187264873	0.0435431370293781	down
chrX	96682044	96687088	5045	chrX_96682044_96687088	IAPEz-int	LTR/ERVK	LTR	ERVK	6.16992500144231	6.72109918870718	-0.551174187264873	0.0419665615983443	down
chr18	8771535	8776453	4919	chr18_8771535_8776453	IAPEz-int	LTR/ERVK	LTR	ERVK	6.53138146051631	7.08214904135387	-0.55076758083756	0.0224811012706449	down
chr8	100110931	100117657	6727	chr8_100110931_100117657	IAPEz-int	LTR/ERVK	LTR	ERVK	6.83920378809694	7.38801728534513	-0.548813497248191	0.00885846352418006	down
chr8	64287789	64293987	6199	chr8_64287789_64293987	L1MdTf_II	LINE/L1	LINE	L1	6.32192809488736	6.8703647195834	-0.548436624696042	0.0280316196996626	down
chr11	18636169	18642606	6438	chr11_18636169_18642606	L1MdTf_III	LINE/L1	LINE	L1	6.3037807481771	6.85174904141606	-0.547968293238954	0.0325906303103158	down
chr12	43175273	43181721	6449	chr12_43175273_43181721	L1MdTf_I	LINE/L1	LINE	L1	6.24792751344359	6.79441586635011	-0.546488352906521	0.0412705284489507	down
chr4	7096756	7102092	5337	chr4_7096756_7102092	IAPEz-int	LTR/ERVK	LTR	ERVK	6.53138146051631	7.07681559705083	-0.545434136534519	0.024143610407298	down
chr1	176543084	176550162	7079	chr1_176543084_176550162	IAPEz-int	LTR/ERVK	LTR	ERVK	7.20945336562895	7.75488750216347	-0.545434136534518	0.00491855803177552	down
chr17	22631702	22636120	4419	chr17_22631702_22636120	IAPEz-int	LTR/ERVK	LTR	ERVK	6.20945336562895	6.75488750216347	-0.545434136534518	0.0443060678640455	down
chr18	58365436	58371622	6187	chr18_58365436_58371622	L1MdA_II	LINE/L1	LINE	L1	6.07681559705083	6.62205181945638	-0.545236222405546	0.0489060975217578	down
chr2	5684026	5691128	7103	chr2_5684026_5691128	IAPEz-int	LTR/ERVK	LTR	ERVK	7.03342300153745	7.57742882803575	-0.544005826498299	0.00674327730340281	down
chr13	8167018	8173220	6203	chr13_8167018_8173220	L1MdTf_II	LINE/L1	LINE	L1	6.12928301694497	6.6724253419715	-0.543142325026529	0.0416172586453732	down
chrX	58288443	58294676	6234	chrX_58288443_58294676	L1MdTf_III	LINE/L1	LINE	L1	6.23840473932508	6.78135971352466	-0.542954974199581	0.0337614216846244	down
chr1	111703296	111710469	7174	chr1_111703296_111710469	IAPEz-int	LTR/ERVK	LTR	ERVK	7.10852445677817	7.65105169117893	-0.54252723440076	0.00468986968202845	down
chrX	92268603	92275165	6563	chrX_92268603_92275165	L1MdA_I	LINE/L1	LINE	L1	6.57742882803575	7.11894107272351	-0.541512244687759	0.0466792006011084	down
chrX	162179105	162185825	6721	chrX_162179105_162185825	IAPEz-int	LTR/ERVK	LTR	ERVK	7.01122725542325	7.55074678538324	-0.539519529959989	0.00912961028187552	down
chr4	135184495	135188779	4285	chr4_135184495_135188779	IAPEz-int	LTR/ERVK	LTR	ERVK	6.55458885167764	7.09275714091985	-0.538168289242215	0.0297867804126726	down
chr8	33223533	33229909	6377	chr8_33223533_33229909	L1MdTf_III	LINE/L1	LINE	L1	6.07681559705083	6.61470984411521	-0.537894247064377	0.0483446945921852	down
chr12	32902329	32906432	4104	chr12_32902329_32906432	IAPEz-int	LTR/ERVK	LTR	ERVK	6.40087943628218	6.93663793900257	-0.535758502720387	0.0360156113912888	down
chr14	116507563	116513980	6418	chr14_116507563_116513980	L1MdGf_I	LINE/L1	LINE	L1	6.10852445677817	6.64385618977472	-0.535331732996555	0.0478029982895228	down
chr1	179893892	179901168	7277	chr1_179893892_179901168	IAPEz-int	LTR/ERVK	LTR	ERVK	6.54689445988764	7.08214904135387	-0.535254581466235	0.0234704876703775	down
chr7	59498859	59506155	7297	chr7_59498859_59506155	IAPEz-int	LTR/ERVK	LTR	ERVK	6.54689445988764	7.08214904135387	-0.535254581466235	0.0227799911441367	down
chr18	22963123	22969472	6350	chr18_22963123_22969472	L1MdTf_I	LINE/L1	LINE	L1	6.34872815423108	6.88264304936184	-0.533914895130764	0.0332193561740173	down
chr14	83870230	83874021	3792	chr14_83870230_83874021	IAPEz-int	LTR/ERVK	LTR	ERVK	6.06608919045777	6.59991284218713	-0.533823651729356	0.049941326204114	down
chr13	77537830	77544501	6672	chr13_77537830_77544501	L1MdTf_I	LINE/L1	LINE	L1	6.4262647547021	6.96000193206808	-0.533737177365983	0.0267939771643748	down
chr12	95248418	95255506	7089	chr12_95248418_95255506	L1MdTf_III	LINE/L1	LINE	L1	6.71424551766612	7.24792751344359	-0.533681995777463	0.0170466240755049	down
chrX	46272713	46279078	6366	chrX_46272713_46279078	L1MdA_I	LINE/L1	LINE	L1	6.33091687811462	6.86418614465428	-0.533269266539664	0.0318411681402745	down
chr1	27180137	27187260	7124	chr1_27180137_27187260	IAPEz-int	LTR/ERVK	LTR	ERVK	7.09275714091985	7.62570884306446	-0.532951702144612	0.00628018243381493	down
chr4	64362242	64368601	6360	chr4_64362242_64368601	L1MdA_I	LINE/L1	LINE	L1	6.39231742277876	6.92481250360578	-0.532495080827021	0.0297462489559068	down
chr7	58118166	58125397	7232	chr7_58118166_58125397	IAPEz-int	LTR/ERVK	LTR	ERVK	6.79441586635011	7.3264294871223	-0.532013620772197	0.0133242326399205	down
chr6	27117183	27124252	7070	chr6_27117183_27124252	IAPEz-int	LTR/ERVK	LTR	ERVK	7.25266543245025	7.78463484555752	-0.531969413107272	0.00411471430505486	down
chr4	79560869	79567507	6639	chr4_79560869_79567507	IAPEz-int	LTR/ERVK	LTR	ERVK	7.29462074889163	7.82654848729092	-0.531927738399288	0.00361877358509802	down
chr13	116578050	116585190	7141	chr13_116578050_116585190	IAPEz-int	LTR/ERVK	LTR	ERVK	7	7.53138146051631	-0.531381460516312	0.00885910898535164	down
chrX	41305096	41311494	6399	chrX_41305096_41311494	L1MdTf_II	LINE/L1	LINE	L1	6.38370429247405	6.91288933622996	-0.52918504375591	0.0322562402807825	down
chr6	140322080	140326834	4755	chr6_140322080_140326834	IAPEz-int	LTR/ERVK	LTR	ERVK	6.21916852046216	6.74819284958946	-0.529024329127299	0.0439834094246025	down
chr8	4075341	4081501	6161	chr8_4075341_4081501	L1MdA_I	LINE/L1	LINE	L1	6.2667865406949	6.79441586635011	-0.527629325655205	0.0403397567408051	down
chr17	47078081	47085147	7067	chr17_47078081_47085147	IAPEz-int	LTR/ERVK	LTR	ERVK	7.22881869049588	7.75488750216347	-0.526068811667588	0.00608828697467576	down
chr7	10909335	10916461	7127	chr7_10909335_10916461	IAPEz-int	LTR/ERVK	LTR	ERVK	7.05528243550119	7.58120058192496	-0.525918146423767	0.0108517767393805	down
chr8	60817379	60824525	7147	chr8_60817379_60824525	IAPEz-int	LTR/ERVK	LTR	ERVK	7.17492568250068	7.70043971814109	-0.525514035640413	0.00613192645212549	down
chr10	103747916	103754565	6650	chr10_103747916_103754565	L1MdTf_I	LINE/L1	LINE	L1	6.58496250072116	7.10852445677817	-0.523561956057013	0.022291283771942	down
chr1	84121708	84128072	6365	chr1_84121708_84128072	L1MdA_I	LINE/L1	LINE	L1	6.32192809488736	6.84549005094437	-0.523561956057012	0.0361871414431789	down
chr17	36049020	36056126	7107	chr17_36049020_36056126	IAPEz-int	LTR/ERVK	LTR	ERVK	7.3037807481771	7.82654848729092	-0.522767739113812	0.00487586355962273	down
chr1	147282388	147288758	6371	chr1_147282388_147288758	L1MdA_I	LINE/L1	LINE	L1	6.34872815423108	6.8703647195834	-0.521636565352328	0.0369341160458881	down
chr5	77770388	77774901	4514	chr5_77770388_77774901	IAPEz-int	LTR/ERVK	LTR	ERVK	6.61470984411521	7.13442632022093	-0.519716476105717	0.0227808697080068	down
chr9	60045500	60051792	6293	chr9_60045500_60051792	L1MdTf_II	LINE/L1	LINE	L1	6.4178525148859	6.93663793900257	-0.518785424116673	0.0331416149471093	down
chr19	11593042	11599833	6792	chr19_11593042_11599833	L1MdA_II	LINE/L1	LINE	L1	6.4757334309664	6.99435343685886	-0.51862000589246	0.0319502523970234	down
chr17	67001131	67006105	4975	chr17_67001131_67006105	IAPEz-int	LTR/ERVK	LTR	ERVK	6.32192809488736	6.83920378809694	-0.517275693209581	0.0383007252457198	down
chr5	133321812	133328789	6978	chr5_133321812_133328789	L1MdA_I	LINE/L1	LINE	L1	6.8008998999203	7.31741261376487	-0.516512713844564	0.0152619742072604	down
chr14	117258223	117264645	6423	chr14_117258223_117264645	L1MdTf_II	LINE/L1	LINE	L1	6.23840473932508	6.75488750216347	-0.51648276283839	0.0450641477532956	down
chr9	7609900	7614973	5074	chr9_7609900_7614973	IAPEz-int	LTR/ERVK	LTR	ERVK	6.59245703726808	7.10852445677817	-0.516067419510088	0.0252296498283642	down
chr1	114802369	114809398	7030	chr1_114802369_114809398	L1MdGf_I	LINE/L1	LINE	L1	6.92481250360578	7.43879185257826	-0.513979348972479	0.0269491955300969	down
chr19	49176704	49183051	6348	chr19_49176704_49183051	L1MdA_I	LINE/L1	LINE	L1	6.37503943134692	6.88874324889826	-0.513703817551335	0.0455843021066737	down
chr19	29685616	29694361	8746	chr19_29685616_29694361	RLTR6-int	LTR/ERV1	LTR	ERV1	6.37503943134692	6.88874324889826	-0.513703817551335	0.0373044115549845	down
chr5	12164306	12169493	5188	chr5_12164306_12169493	IAPEz-int	LTR/ERVK	LTR	ERVK	6.65821148275179	7.16992500144231	-0.511713518690518	0.0239805665205119	down
chrX	47355814	47362103	6290	chrX_47355814_47362103	L1MdTf_II	LINE/L1	LINE	L1	6.44294349584873	6.95419631038687	-0.511252814538147	0.0412445070269516	down
chr4	96048739	96055796	7058	chr4_96048739_96055796	IAPEz-int	LTR/ERVK	LTR	ERVK	6.98868468677217	7.49984588708321	-0.51116120031104	0.0121795428899143	down
chr16	25565662	25572311	6650	chr16_25565662_25572311	L1MdTf_II	LINE/L1	LINE	L1	6.4093909361377	6.91886323727459	-0.509472301136893	0.0409821678805098	down
chr4	21650298	21657537	7240	chr4_21650298_21657537	L1MdTf_I	LINE/L1	LINE	L1	6.74819284958946	7.25738784269265	-0.509194993103192	0.0222303552087737	down
chr12	115983047	115989941	6895	chr12_115983047_115989941	L1MdTf_III	LINE/L1	LINE	L1	6.28540221886225	6.79441586635011	-0.509013647487857	0.0479198919815641	down
chrX	159010574	159017722	7149	chrX_159010574_159017722	L1MdA_I	LINE/L1	LINE	L1	7.27612440527424	7.78463484555752	-0.508510440283283	0.00564942262655035	down
chr6	43784860	43791995	7136	chr6_43784860_43791995	IAPEz-int	LTR/ERVK	LTR	ERVK	7.11374216604919	7.62205181945638	-0.508309653407188	0.00904987875837209	down
chr8	96193361	96199586	6226	chr8_96193361_96199586	L1MdTf_II	LINE/L1	LINE	L1	6.37503943134692	6.88264304936184	-0.507603618014917	0.0427188743304502	down
chr14	66462689	66469839	7151	chr14_66462689_66469839	IAPEz-int	LTR/ERVK	LTR	ERVK	7.2240016741981	7.73131903102506	-0.50731735682696	0.00872127958841902	down
chr9	92734666	92742098	7433	chr9_92734666_92742098	IAPEz-int	LTR/ERVK	LTR	ERVK	6.65821148275179	7.16490692667569	-0.506695443923893	0.0353899210849887	down
chr6	104218140	104226987	8848	chr6_104218140_104226987	RLTR6-int	LTR/ERV1	LTR	ERV1	6.40087943628218	6.90689059560852	-0.506011159326334	0.0383365910946126	down
chr3	53129445	53136213	6769	chr3_53129445_53136213	L1MdA_I	LINE/L1	LINE	L1	6.8073549220576	7.31288295528436	-0.505528033226752	0.0302491699417743	down
chr1	76459995	76466418	6424	chr1_76459995_76466418	L1MdTf_I	LINE/L1	LINE	L1	6.44294349584873	6.94836723158468	-0.50542373573595	0.0411213764585285	down
chr17	17276594	17282005	5412	chr17_17276594_17282005	MERVL_2A-int	LTR/ERVL	LTR	ERVL	6.57742882803575	7.08214904135387	-0.504720213318123	0.0296623854688828	down
chr11	45367770	45374629	6860	chr11_45367770_45374629	L1MdTf_I	LINE/L1	LINE	L1	6.61470984411521	7.11894107272351	-0.504231228608299	0.0284340057231213	down
chr9	55828644	55835131	6488	chr9_55828644_55835131	L1MdTf_I	LINE/L1	LINE	L1	6.467605550083	6.97154355395077	-0.503938003867774	0.0418295127863707	down
chr8	52836187	52843882	7696	chr8_52836187_52843882	L1MdGf_I	LINE/L1	LINE	L1	7.23840473932508	7.74146698640115	-0.503062247076069	0.0343600269090429	down
chrX	112742078	112749155	7078	chrX_112742078_112749155	IAPEz-int	LTR/ERVK	LTR	ERVK	7.27612440527424	7.77807712953536	-0.501952724261121	0.00801414403447895	down
chr8	56743774	56750238	6465	chr8_56743774_56750238	MERVL-int	LTR/ERVL	LTR	ERVL	6.4178525148859	6.91886323727459	-0.501010722388696	0.0399262528423277	down
chr5	83108745	83115164	6420	chr5_83108745_83115164	L1MdTf_II	LINE/L1	LINE	L1	6.31288295528436	6.81378119121704	-0.500898235932682	0.0476270463021829	down
chr10	100578978	100583760	4783	chr10_100578978_100583760	IAPEz-int	LTR/ERVK	LTR	ERVK	6.48381577726426	6.98299357469431	-0.499177797430054	0.0369567962178709	down
chr3	151951043	151958228	7186	chr3_151951043_151958228	L1MdA_I	LINE/L1	LINE	L1	7.10852445677817	7.60733031374961	-0.498805856971441	0.0318705916933854	down
chr13	86712830	86719908	7079	chr13_86712830_86719908	IAPEz-int	LTR/ERVK	LTR	ERVK	7.36632221424582	7.86418614465428	-0.497863930408465	0.00614543202398891	down
chr6	8608621	8615733	7113	chr6_8608621_8615733	IAPEz-int	LTR/ERVK	LTR	ERVK	7.3037807481771	7.8008998999203	-0.497119151743202	0.0416778161964585	down
chrX	141820764	141827021	6258	chrX_141820764_141827021	L1MdTf_I	LINE/L1	LINE	L1	6.49185309632967	6.98868468677217	-0.496831590442491	0.0451430481219734	down
chr5	49537993	49544918	6926	chr5_49537993_49544918	L1MdTf_I	LINE/L1	LINE	L1	6.59245703726808	7.08746284125034	-0.495005803982258	0.0369750578256647	down
chr1	160421328	160428304	6977	chr1_160421328_160428304	L1MdA_I	LINE/L1	LINE	L1	6.76818432477693	7.26209484537018	-0.493910520593253	0.0441692780049992	down
chr12	95340539	95347011	6473	chr12_95340539_95347011	L1MdTf_I	LINE/L1	LINE	L1	6.4262647547021	6.91886323727459	-0.492598482572497	0.0491835668706197	down
chr11	56203816	56211295	7480	chr11_56203816_56211295	L1MdTf_II	LINE/L1	LINE	L1	7.05528243550119	7.54689445988764	-0.491612024386447	0.0138137997575087	down
chr1	116855479	116862552	7074	chr1_116855479_116862552	L1MdTf_I	LINE/L1	LINE	L1	6.65821148275179	7.14974711950468	-0.491535636752888	0.0298621934392435	down
chr6	101138357	101143774	5418	chr6_101138357_101143774	IAPEz-int	LTR/ERVK	LTR	ERVK	6.69348695749933	7.18487534290828	-0.491388385408959	0.0272140207162649	down
chr4	10002731	10009426	6696	chr4_10002731_10009426	IAPEz-int	LTR/ERVK	LTR	ERVK	7.1548181090521	7.64385618977472	-0.48903808072262	0.0108947249643322	down
chrX	78708803	78715907	7105	chrX_78708803_78715907	IAPEz-int	LTR/ERVK	LTR	ERVK	7.29920801838728	7.78790255939143	-0.488694541004153	0.0214839604155356	down
chr4	35377363	35384460	7098	chr4_35377363_35384460	IAPEz-int	LTR/ERVK	LTR	ERVK	7.17492568250068	7.66177809777199	-0.486852415271308	0.0116963448144502	down
chr17	37853520	37860081	6562	chr17_37853520_37860081	L1MdA_I	LINE/L1	LINE	L1	6.467605550083	6.95419631038687	-0.486590760303877	0.0468903905021457	down
chr2	99545225	99552649	7425	chr2_99545225_99552649	IAPEz-int	LTR/ERVK	LTR	ERVK	7.00562454919388	7.49185309632967	-0.486228547135797	0.0170466677648047	down
chrX	97960216	97967808	7593	chrX_97960216_97967808	L1MdTf_III	LINE/L1	LINE	L1	6.90689059560852	7.39231742277876	-0.485426827170242	0.0197010232060888	down
chr1	175042002	175048286	6285	chr1_175042002_175048286	IAPEz-int	LTR/ERVK	LTR	ERVK	7.02790599656988	7.51175265376738	-0.483846657197494	0.0153352750593861	down
chr4	67916010	67922885	6876	chr4_67916010_67922885	L1MdTf_II	LINE/L1	LINE	L1	6.83920378809694	7.32192809488736	-0.482724306790419	0.026965327134871	down
chr13	5278077	5284042	5966	chr13_5278077_5284042	IAPEz-int	LTR/ERVK	LTR	ERVK	7.00562454919388	7.48784003382305	-0.482215484629173	0.0214768866891153	down
chr5	125715382	125722474	7093	chr5_125715382_125722474	IAPEz-int	LTR/ERVK	LTR	ERVK	7.2336196767597	7.71424551766612	-0.480625840906421	0.0355834907368593	down
chr16	56934168	56940959	6792	chr16_56934168_56940959	L1MdGf_I	LINE/L1	LINE	L1	6.49185309632967	6.97154355395077	-0.479690457621097	0.0458364443049325	down
chr1	162338490	162345385	6896	chr1_162338490_162345385	L1MdGf_I	LINE/L1	LINE	L1	6.66533591718518	7.14465824283188	-0.479322325646706	0.0410793649041293	down
chrX	62197299	62204253	6955	chrX_62197299_62204253	L1MdTf_I	LINE/L1	LINE	L1	6.51569983828404	6.99435343685886	-0.478653598574815	0.0482133891797827	down
chr5	151655115	151662232	7118	chr5_151655115_151662232	L1MdTf_III	LINE/L1	LINE	L1	6.72109918870718	7.19967234483636	-0.47857315612918	0.0318753378849256	down
chr13	43277543	43284656	7114	chr13_43277543_43284656	IAPEz-int	LTR/ERVK	LTR	ERVK	6.90086680798075	7.37937836707126	-0.478511559090514	0.0214013145830184	down
chr18	28623025	28630429	7405	chr18_28623025_28630429	L1MdA_I	LINE/L1	LINE	L1	7.1548181090521	7.63299519714296	-0.478177088090854	0.01536938518721	down
chr4	4652120	4659277	7158	chr4_4652120_4659277	IAPEz-int	LTR/ERVK	LTR	ERVK	7.29001884693262	7.76818432477693	-0.478165477844308	0.0116118718553295	down
chr2	81460311	81467062	6752	chr2_81460311_81467062	IAPEz-int	LTR/ERVK	LTR	ERVK	6.90689059560852	7.38370429247405	-0.476813696865533	0.0237222751369616	down
chr9	98250055	98257750	7696	chr9_98250055_98257750	L1MdTf_I	LINE/L1	LINE	L1	7.02790599656988	7.50382573799575	-0.475919741425866	0.0181504992780977	down
chr14	85889096	85896207	7112	chr14_85889096_85896207	IAPEz-int	LTR/ERVK	LTR	ERVK	7.2336196767597	7.70735913208088	-0.473739455321181	0.0110185968467167	down
chr16	97770524	97777755	7232	chr16_97770524_97777755	IAPEz-int	LTR/ERVK	LTR	ERVK	7.10852445677817	7.58120058192496	-0.472676125146788	0.0490631862835164	down
chr4	48795150	48801876	6727	chr4_48795150_48801876	L1MdTf_II	LINE/L1	LINE	L1	6.76155123244448	7.2336196767597	-0.472068444315222	0.0361781572752757	down
chr5	59119464	59126691	7228	chr5_59119464_59126691	IAPEz-int	LTR/ERVK	LTR	ERVK	7.14974711950468	7.61838550225861	-0.468638382753924	0.0195830710816468	down
chr4	38870095	38877194	7100	chr4_38870095_38877194	IAPEz-int	LTR/ERVK	LTR	ERVK	7.43045255166553	7.89784545600551	-0.46739290433998	0.0165723380462835	down
chr17	72449331	72456697	7367	chr17_72449331_72456697	IAPEz-int	LTR/ERVK	LTR	ERVK	7.12928301694497	7.59618975614441	-0.466906739199444	0.0156766547874731	down
chr7	48366313	48372894	6582	chr7_48366313_48372894	IAPEz-int	LTR/ERVK	LTR	ERVK	7.12928301694497	7.59618975614441	-0.466906739199444	0.0204710816490183	down
chr8	109739055	109746202	7148	chr8_109739055_109746202	IAPEz-int	LTR/ERVK	LTR	ERVK	7.14465824283188	7.61102479730735	-0.46636655447547	0.0153292006146871	down
chr7	85926414	85933495	7082	chr7_85926414_85933495	IAPEz-int	LTR/ERVK	LTR	ERVK	7.26209484537018	7.7279204545632	-0.465825609193019	0.0165643162557249	down
chr1	112929396	112935451	6056	chr1_112929396_112935451	IAPEz-int	LTR/ERVK	LTR	ERVK	6.93663793900257	7.40087943628218	-0.464241497279613	0.0242619746708938	down
chr9	24266806	24273311	6506	chr9_24266806_24273311	L1MdGf_I	LINE/L1	LINE	L1	6.56985560833095	7.03342300153745	-0.463567393206502	0.0458566566709394	down
chr9	11498694	11505256	6563	chr9_11498694_11505256	L1MdA_I	LINE/L1	LINE	L1	6.55458885167764	7.01680828768655	-0.462219436008916	0.0482891203613113	down
chr4	143644880	143652059	7180	chr4_143644880_143652059	IAPEz-int	LTR/ERVK	LTR	ERVK	7.17492568250068	7.63662462054365	-0.46169893804297	0.0250953856751134	down
chr1	69231434	69238515	7082	chr1_69231434_69238515	L1MdTf_I	LINE/L1	LINE	L1	6.74819284958946	7.20945336562895	-0.46126051603949	0.0356818326970271	down
chr7	10471330	10478561	7232	chr7_10471330_10478561	L1MdGf_I	LINE/L1	LINE	L1	6.95419631038687	7.41362792902417	-0.459431618637297	0.0261160343240679	down
chrX	55600952	55607719	6768	chrX_55600952_55607719	L1MdA_I	LINE/L1	LINE	L1	6.70043971814109	7.15987133677839	-0.459431618637297	0.0398858740487151	down
chr16	76169606	76176668	7063	chr16_76169606_76176668	IAPEz-int	LTR/ERVK	LTR	ERVK	7.4594316186373	7.91886323727459	-0.459431618637297	0.0119156690232827	down
chr16	41195161	41202316	7156	chr16_41195161_41202316	IAPEz-int	LTR/ERVK	LTR	ERVK	7.3264294871223	7.78463484555752	-0.458205358435217	0.015625771907673	down
chr8	58095275	58102709	7435	chr8_58095275_58102709	L1MdA_I	LINE/L1	LINE	L1	7.11374216604919	7.56985560833095	-0.45611344228176	0.0256333287617237	down
chr15	49372295	49379687	7393	chr15_49372295_49379687	L1MdA_I	LINE/L1	LINE	L1	6.76818432477693	7.2240016741981	-0.455817349421179	0.0438763690854848	down
chrX	80955103	80966825	11723	chrX_80955103_80966825	L1MdGf_I	LINE/L1	LINE	L1	7.4093909361377	7.86418614465428	-0.454795208516579	0.0116433263933703	down
chr5	13864946	13871780	6835	chr5_13864946_13871780	L1MdTf_II	LINE/L1	LINE	L1	6.68650052718322	7.13955135239879	-0.453050825215575	0.0486759631828085	down
chr1	25662056	25669288	7233	chr1_25662056_25669288	L1MdTf_I	LINE/L1	LINE	L1	6.8703647195834	7.32192809488736	-0.451563375303958	0.0381364628770405	down
chr1	79937079	79944160	7082	chr1_79937079_79944160	IAPEz-int	LTR/ERVK	LTR	ERVK	7.16992500144231	7.61838550225861	-0.448460500816294	0.023519711298012	down
chr3	68732548	68739651	7104	chr3_68732548_68739651	IAPEz-int	LTR/ERVK	LTR	ERVK	7.12928301694497	7.57742882803575	-0.448145811090782	0.0210304759310697	down
chr13	21629818	21636909	7092	chr13_21629818_21636909	IAPEz-int	LTR/ERVK	LTR	ERVK	7.29001884693262	7.73809225962049	-0.448073412687872	0.015085568232413	down
chr1	94722898	94729739	6842	chr1_94722898_94729739	L1MdTf_II	LINE/L1	LINE	L1	6.74819284958946	7.19475685442225	-0.446564004832787	0.0429898520105742	down
chr4	94813243	94819512	6270	chr4_94813243_94819512	IAPEz-int	LTR/ERVK	LTR	ERVK	6.96000193206808	7.40514146313634	-0.445139531068263	0.037636811310125	down
chrX	61962519	61969624	7106	chrX_61962519_61969624	L1MdGf_I	LINE/L1	LINE	L1	7.11374216604919	7.55842071326866	-0.444678547219477	0.0270429963002327	down
chr3	14234735	14242307	7573	chr3_14234735_14242307	IAPEz-int	LTR/ERVK	LTR	ERVK	7.12928301694497	7.57364718749332	-0.444364170548356	0.0227711245074372	down
chr1	84263501	84270713	7213	chr1_84263501_84270713	L1MdA_I	LINE/L1	LINE	L1	6.96578428466209	7.4093909361377	-0.443606651475615	0.0302793809415048	down
chr1	47628945	47636451	7507	chr1_47628945_47636451	L1MdGf_I	LINE/L1	LINE	L1	7.30833903013941	7.7515440590891	-0.44320502894969	0.0178226542871162	down
chr3	10804177	10810940	6764	chr3_10804177_10810940	L1MdA_I	LINE/L1	LINE	L1	6.68650052718322	7.12928301694497	-0.442782489761748	0.0479376707123969	down
chr7	24578166	24584130	5965	chr7_24578166_24584130	IAPEz-int	LTR/ERVK	LTR	ERVK	6.90689059560852	7.34872815423108	-0.441837558622558	0.0431945023378826	down
chr16	67629914	67636988	7075	chr16_67629914_67636988	IAPEz-int	LTR/ERVK	LTR	ERVK	7.3264294871223	7.76818432477693	-0.441754837654623	0.0215645161323223	down
chr6	145895826	145902937	7112	chr6_145895826_145902937	IAPEz-int	LTR/ERVK	LTR	ERVK	7.35314682549808	7.79441586635011	-0.441269040852023	0.0150042318618718	down
chr7	58235155	58242017	6863	chr7_58235155_58242017	L1MdGf_I	LINE/L1	LINE	L1	6.89481776330794	7.33539035469393	-0.440572591385981	0.0396045752409311	down
chr5	16284912	16291981	7070	chr5_16284912_16291981	IAPEz-int	LTR/ERVK	LTR	ERVK	7.19967234483636	7.64024493622235	-0.440572591385981	0.0209394916035495	down
chr17	14864800	14871533	6734	chr17_14864800_14871533	IAPEz-int	LTR/ERVK	LTR	ERVK	7.10852445677817	7.54689445988764	-0.438370003109467	0.0246102856124734	down
chr5	52895685	52902847	7163	chr5_52895685_52902847	L1MdA_I	LINE/L1	LINE	L1	6.85174904141606	7.29001884693262	-0.438269805516561	0.0403924241594226	down
chr7	96317608	96324708	7101	chr7_96317608_96324708	IAPEz-int	LTR/ERVK	LTR	ERVK	7.35755200461808	7.79441586635011	-0.436863861732022	0.0174289555761311	down
chrX	19661688	19668815	7128	chrX_19661688_19668815	IAPEz-int	LTR/ERVK	LTR	ERVK	7.18982455888002	7.62570884306446	-0.435884284184447	0.0290320768039114	down
chr11	40342139	40349325	7187	chr11_40342139_40349325	L1MdA_I	LINE/L1	LINE	L1	7.01122725542325	7.44708322620965	-0.435855970786398	0.0307106158536388	down
chr12	114633211	114640661	7451	chr12_114633211_114640661	IAPEz-int	LTR/ERVK	LTR	ERVK	7.01122725542325	7.44708322620965	-0.435855970786398	0.0330029013879166	down
chr16	86074711	86081767	7057	chr16_86074711_86081767	IAPEz-int	LTR/ERVK	LTR	ERVK	6.98868468677217	7.42206476617281	-0.433380079400647	0.0395713078476949	down
chr8	24767413	24774596	7184	chr8_24767413_24774596	IAPEz-int	LTR/ERVK	LTR	ERVK	7.21431912080077	7.64745842645492	-0.433139305654155	0.0279647080028084	down
chr1	16738274	16745324	7051	chr1_16738274_16745324	IAPEz-int	LTR/ERVK	LTR	ERVK	7.32192809488736	7.75488750216347	-0.432959407276106	0.0253799118990933	down
chrX	90711790	90718129	6340	chrX_90711790_90718129	MERVL-int	LTR/ERVL	LTR	ERVL	6.78790255939143	7.21916852046216	-0.431265961070729	0.0470901550039291	down
chrX	109280532	109285926	5395	chrX_109280532_109285926	L1MdA_I	LINE/L1	LINE	L1	6.93073733756289	7.36194377373524	-0.431206436172355	0.0394152887809175	down
chr4	123770778	123777874	7097	chr4_123770778_123777874	IAPEz-int	LTR/ERVK	LTR	ERVK	7.2667865406949	7.69696752623429	-0.430180985539386	0.0231830030829945	down
chr7	41165821	41175532	9712	chr7_41165821_41175532	L1MdA_I	LINE/L1	LINE	L1	7.89178370321831	8.32192809488736	-0.430144391669051	0.0052184536442917	down
chr11	47427878	47434887	7010	chr11_47427878_47434887	L1MdA_I	LINE/L1	LINE	L1	6.90086680798075	7.33091687811462	-0.430050070133868	0.0411491034783873	down
chr1	170115798	170122881	7084	chr1_170115798_170122881	IAPEz-int	LTR/ERVK	LTR	ERVK	7.21431912080077	7.64385618977472	-0.429537068973959	0.030584861290375	down
chr4	96946616	96953879	7264	chr4_96946616_96953879	IAPEz-int	LTR/ERVK	LTR	ERVK	6.90689059560852	7.33539035469393	-0.428499759085406	0.0405883211696747	down
chr8	52962921	52970104	7184	chr8_52962921_52970104	IAPEz-int	LTR/ERVK	LTR	ERVK	7.13955135239879	7.56605403817109	-0.426502685772298	0.029922911652444	down
chr2	11121222	11128489	7268	chr2_11121222_11128489	L1MdTf_I	LINE/L1	LINE	L1	6.93663793900257	7.36194377373524	-0.42530583473267	0.0428917955033751	down
chr7	23551984	23559054	7071	chr7_23551984_23559054	IAPEz-int	LTR/ERVK	LTR	ERVK	7.20945336562895	7.63299519714296	-0.423541831514008	0.0338085573000521	down
chr8	56174870	56181958	7089	chr8_56174870_56181958	IAPEz-int	LTR/ERVK	LTR	ERVK	7.33539035469393	7.75822321472672	-0.422832860032799	0.0251564524627071	down
chr11	18806339	18813762	7424	chr11_18806339_18813762	IAPEz-int	LTR/ERVK	LTR	ERVK	7.13955135239879	7.56224242422107	-0.422691071822279	0.0370859981995117	down
chr14	28182492	28189385	6894	chr14_28182492_28189385	L1MdGf_I	LINE/L1	LINE	L1	6.96578428466209	7.38801728534513	-0.422233000683048	0.0468920731808394	down
chr14	124654232	124661277	7046	chr14_124654232_124661277	L1MdTf_I	LINE/L1	LINE	L1	6.98299357469431	7.40514146313634	-0.422147888442034	0.0473056447397017	down
chr1	74653421	74660599	7179	chr1_74653421_74660599	IAPEz-int	LTR/ERVK	LTR	ERVK	7.35755200461808	7.77807712953536	-0.420525124917274	0.0390845753590765	down
chr7	124895129	124902233	7105	chr7_124895129_124902233	IAPEz-int	LTR/ERVK	LTR	ERVK	7.08746284125034	7.5077946401987	-0.420331798948357	0.0361045543616205	down
chrX	118406517	118413655	7139	chrX_118406517_118413655	IAPEz-int	LTR/ERVK	LTR	ERVK	7.42206476617281	7.84235034341381	-0.420285577240996	0.0186954451753348	down
chr8	54142888	54150035	7148	chr8_54142888_54150035	IAPEz-int	LTR/ERVK	LTR	ERVK	7.45121111183233	7.8703647195834	-0.419153607751076	0.0176745061711151	down
chr5	82875938	82883124	7187	chr5_82875938_82883124	IAPEz-int	LTR/ERVK	LTR	ERVK	7.10852445677817	7.5274770060604	-0.418952549282227	0.0332969943254815	down
chr6	3650382	3657457	7076	chr6_3650382_3657457	IAPEz-int	LTR/ERVK	LTR	ERVK	7.10852445677817	7.5274770060604	-0.418952549282227	0.032810865612268	down
chr7	92225307	92232396	7090	chr7_92225307_92232396	IAPEz-int	LTR/ERVK	LTR	ERVK	7.467605550083	7.8856963733394	-0.418090823256398	0.0224202154861092	down
chr6	109706291	109713396	7106	chr6_109706291_109713396	IAPEz-int	LTR/ERVK	LTR	ERVK	7.12928301694497	7.54689445988764	-0.41761144294267	0.0353995745477595	down
chrX	65706926	65713988	7063	chrX_65706926_65713988	IAPEz-int	LTR/ERVK	LTR	ERVK	7.2336196767597	7.65105169117893	-0.417432014419227	0.029666842549051	down
chr1	113016075	113023196	7122	chr1_113016075_113023196	IAPEz-int	LTR/ERVK	LTR	ERVK	7.20945336562895	7.62570884306446	-0.416255477435515	0.0338793926536792	down
chr13	39506928	39513512	6585	chr13_39506928_39513512	IAPEz-int	LTR/ERVK	LTR	ERVK	7.23840473932508	7.65463602852797	-0.416231289202889	0.0330863845917471	down
chrX	143172942	143179331	6390	chrX_143172942_143179331	IAPEz-int	LTR/ERVK	LTR	ERVK	7.09275714091985	7.5077946401987	-0.415037499278844	0.0380312817633621	down
chr1	144384050	144391363	7314	chr1_144384050_144391363	IAPEz-int	LTR/ERVK	LTR	ERVK	7	7.41362792902417	-0.413627929024172	0.0472420022209327	down
chr12	24395370	24402600	7231	chr12_24395370_24402600	IAPEz-int	LTR/ERVK	LTR	ERVK	7.1548181090521	7.56605403817109	-0.411235929118988	0.0358495645125696	down
chr9	98677606	98683549	5944	chr9_98677606_98683549	IAPEz-int	LTR/ERVK	LTR	ERVK	7.01122725542325	7.42206476617281	-0.410837510749558	0.0479455760263924	down
chr1	67751446	67758537	7092	chr1_67751446_67758537	IAPEz-int	LTR/ERVK	LTR	ERVK	7.3037807481771	7.71424551766612	-0.410464769489019	0.0297025189748185	down
chr3	92546898	92554289	7392	chr3_92546898_92554289	L1MdA_I	LINE/L1	LINE	L1	7.28540221886225	7.69348695749933	-0.408084738637077	0.0344752286560866	down
chr5	85073875	85081174	7300	chr5_85073875_85081174	IAPEz-int	LTR/ERVK	LTR	ERVK	7.25266543245025	7.65821148275179	-0.405546050301546	0.0369783863951913	down
chr14	96283925	96290996	7072	chr14_96283925_96290996	IAPEz-int	LTR/ERVK	LTR	ERVK	7.02236781302845	7.4262647547021	-0.403896941673644	0.0470577991881962	down
chr14	100248601	100255707	7107	chr14_100248601_100255707	IAPEz-int	LTR/ERVK	LTR	ERVK	7.12412131182919	7.5274770060604	-0.403355694231208	0.0403086584222629	down
chr16	4743411	4750484	7074	chr16_4743411_4750484	IAPEz-int	LTR/ERVK	LTR	ERVK	7.30833903013941	7.71080643369935	-0.402467403559944	0.0488485186232855	down
chr8	4886139	4893220	7082	chr8_4886139_4893220	IAPEz-int	LTR/ERVK	LTR	ERVK	7.14465824283188	7.54689445988764	-0.402236217055754	0.0413250064661072	down
chr12	94036431	94043766	7336	chr12_94036431_94043766	IAPEz-int	LTR/ERVK	LTR	ERVK	7.04984854945056	7.45121111183233	-0.401362562381768	0.0498048273172367	down
chr17	94296362	94303444	7083	chr17_94296362_94303444	IAPEz-int	LTR/ERVK	LTR	ERVK	7.2667865406949	7.66533591718518	-0.398549376490275	0.0357036966252208	down
chr5	77559629	77566757	7129	chr5_77559629_77566757	IAPEz-int	LTR/ERVK	LTR	ERVK	7.11374216604919	7.51175265376738	-0.398010487718191	0.0452470077397446	down
chr6	64154496	64161619	7124	chr6_64154496_64161619	IAPEz-int	LTR/ERVK	LTR	ERVK	7.17990909001493	7.57742882803575	-0.397519738020814	0.0384058519627801	down
chr13	32947567	32954678	7112	chr13_32947567_32954678	IAPEz-int	LTR/ERVK	LTR	ERVK	7.29001884693262	7.68650052718322	-0.3964816802506	0.0336038402943888	down
chr12	31358158	31365225	7068	chr12_31358158_31365225	IAPEz-int	LTR/ERVK	LTR	ERVK	7.2807707701306	7.67595703294175	-0.395186262811147	0.041730376717016	down
chr5	38405691	38412849	7159	chr5_38405691_38412849	IAPEz-int	LTR/ERVK	LTR	ERVK	7.45121111183233	7.84549005094437	-0.394278939112046	0.0340559103531165	down
chr12	66407049	66414113	7065	chr12_66407049_66414113	IAPEz-int	LTR/ERVK	LTR	ERVK	7.25738784269265	7.65105169117893	-0.393663848486277	0.0365509819429502	down
chr5	21235418	21242602	7185	chr5_21235418_21242602	IAPEz-int	LTR/ERVK	LTR	ERVK	7.30833903013941	7.70043971814109	-0.392100688001684	0.0400284819190388	down
chr12	68621713	68628949	7237	chr12_68621713_68628949	IAPEz-int	LTR/ERVK	LTR	ERVK	7.31288295528436	7.70390357344466	-0.391020618160308	0.0408311085318685	down
chr3	140019938	140027032	7095	chr3_140019938_140027032	IAPEz-int	LTR/ERVK	LTR	ERVK	7.40514146313634	7.79441586635011	-0.389274403213762	0.0308466824260775	down
chr13	31233367	31240486	7120	chr13_31233367_31240486	IAPEz-int	LTR/ERVK	LTR	ERVK	7.29462074889163	7.67948009950545	-0.384859350613819	0.0420176226591143	down
chrX	156579871	156586950	7080	chrX_156579871_156586950	IAPEz-int	LTR/ERVK	LTR	ERVK	7.48381577726426	7.86727873970966	-0.383462962445406	0.0286404749533431	down
chr1	146397206	146404288	7083	chr1_146397206_146404288	IAPEz-int	LTR/ERVK	LTR	ERVK	7.37503943134692	7.75822321472672	-0.3831837833798	0.0446308503302855	down
chr1	144854675	144861794	7120	chr1_144854675_144861794	IAPEz-int	LTR/ERVK	LTR	ERVK	7.40514146313634	7.78790255939143	-0.382761096255088	0.0409989434640534	down
chr17	81238359	81245901	7543	chr17_81238359_81245901	L1MdGf_I	LINE/L1	LINE	L1	7.22881869049588	7.61102479730735	-0.382206106811472	0.0449309996661718	down
chr12	3330822	3337937	7116	chr12_3330822_3337937	IAPEz-int	LTR/ERVK	LTR	ERVK	7.36632221424582	7.74819284958946	-0.381870635343645	0.0399509532029176	down
chr16	71785563	71792666	7104	chr16_71785563_71792666	IAPEz-int	LTR/ERVK	LTR	ERVK	7.35314682549808	7.73470962022584	-0.381562794727755	0.0416430978286508	down
chrX	18715569	18722755	7187	chrX_18715569_18722755	L1MdA_I	LINE/L1	LINE	L1	7.2807707701306	7.66177809777199	-0.381007327641385	0.0444840888140745	down
chr1	121202599	121210831	8233	chr1_121202599_121210831	L1MdA_I	LINE/L1	LINE	L1	7.69348695749933	8.07146236255662	-0.377975405057298	0.0210433909117887	down
chrX	49351631	49362937	11307	chrX_49351631_49362937	L1MdTf_I	LINE/L1	LINE	L1	7.37068740680722	7.74819284958946	-0.377505442782243	0.0383630946695574	down
chr8	120192591	120199716	7126	chr8_120192591_120199716	IAPEz-int	LTR/ERVK	LTR	ERVK	7.3264294871223	7.70390357344466	-0.37747408632236	0.0399896631645537	down
chr16	27423323	27431143	7821	chr16_27423323_27431143	L1MdGf_I	LINE/L1	LINE	L1	7.5274770060604	7.90388184573618	-0.376404839675784	0.0385312497900527	down
chrX	66493533	66501875	8343	chrX_66493533_66501875	L1MdGf_I	LINE/L1	LINE	L1	7.64024493622235	8.01122725542325	-0.370982319200908	0.0265243132806131	down
chr3	91095001	91106136	11136	chr3_91095001_91106136	L1MdA_I	LINE/L1	LINE	L1	8.36850646150769	8.72962074355304	-0.361114282045346	0.00750478179879402	down
chrX	117087170	117095910	8741	chrX_117087170_117095910	L1MdGf_I	LINE/L1	LINE	L1	7.79441586635011	8.12670447284319	-0.332288606493084	0.0441835550406688	down
chr2	21995961	22007314	11354	chr2_21995961_22007314	L1MdA_I	LINE/L1	LINE	L1	8.33762190199251	8.64385618977473	-0.306234287782218	0.0265611996241368	down
chr7	96821119	96821770	652	chr7_96821119_96821770	B1_Mus1	SINE/Alu	SINE	Alu	6.16992500144231	5.33985000288462	0.830074998557688	0.0183852958016375	up
chr3	31069994	31070722	729	chr3_31069994_31070722	B1_Mus2	SINE/Alu	SINE	Alu	6.36632221424582	5.44294349584873	0.923378718397088	0.00344686597165316	up
chr17	61011942	61014937	2996	chr17_61011942_61014937	IAPEz-int	LTR/ERVK	LTR	ERVK	5.06608919045777	4	1.06608919045777	0.0409297879776442	up
chr11	35731807	35732420	614	chr11_35731807_35732420	B1_Mus1	SINE/Alu	SINE	Alu	5.2667865406949	4.04439411935845	1.22239242133645	0.0184874375387899	up
chrX	149702530	149705023	2494	chrX_149702530_149705023	IAPEz-int	LTR/ERVK	LTR	ERVK	4.88264304936184	3.58496250072116	1.29768054864069	0.0315474730941916	up
chr8	9783061	9786261	3201	chr8_9783061_9786261	RLTR10-int	LTR/ERVK	LTR	ERVK	4.6724253419715	3.32192809488736	1.35049724708413	0.0435658317992507	up
chr18	90181929	90188119	6191	chr18_90181929_90188119	L1MdF_II	LINE/L1	LINE	L1	4.6724253419715	3.24792751344359	1.42449782852791	0.0349831232979541	up
chr14	108647604	108650206	2603	chr14_108647604_108650206	IAPEz-int	LTR/ERVK	LTR	ERVK	4.49185309632967	2.90689059560852	1.58496250072116	0.0412850516687604	up
chr19	15265600	15267149	1550	chr19_15265600_15267149	Lx8	LINE/L1	LINE	L1	4.70043971814109	3	1.70043971814109	0.0120695654363727	up
chr4	60047824	60052879	5056	chr4_60047824_60052879	L1MdFanc_I	LINE/L1	LINE	L1	3.8073549220576	1.58496250072116	2.22239242133645	0.0423133148848269	up
chr13	95506728	95507354	627	chr13_95506728_95507354	B3	SINE/B2	SINE	B2	4.35755200461808	2	2.35755200461808	0.0245092579805085	up
chr14	6875576	6876411	836	chr14_6875576_6876411	RLTR14-int	LTR/ERV1	LTR	ERV1	3.70043971814109	1.32192809488736	2.37851162325373	0.0462817017320862	up
chr4	4415003	4416115	1113	chr4_4415003_4416115	L1MdF_II	LINE/L1	LINE	L1	3.75488750216347	1.32192809488736	2.43295940727611	0.0341393478702691	up
chr2	161798660	161799754	1095	chr2_161798660_161799754	B3A	SINE/B2	SINE	B2	3.85798099512757	1.32192809488736	2.53605290024021	0.0493557537980072	up
chr13	11179898	11180231	334	chr13_11179898_11180231	URR1B	DNA/hAT-Charlie	DNA	hAT-Charlie	2.58496250072116	0	2.58496250072116	0.0499166095994493	up
chr16	92743528	92743655	128	chr16_92743528_92743655	Charlie12_Rodent	DNA/hAT-Charlie	DNA	hAT-Charlie	2.58496250072116	0	2.58496250072116	0.0491239335919203	up
chr1	95686178	95686965	788	chr1_95686178_95686965	L1MA9	LINE/L1	LINE	L1	2.58496250072116	0	2.58496250072116	0.049119068966745	up
chr13	18636533	18638589	2057	chr13_18636533_18638589	Lx8	LINE/L1	LINE	L1	2.58496250072116	0	2.58496250072116	0.0491239335919203	up
chr18	8047326	8047628	303	chr18_8047326_8047628	L1MA4	LINE/L1	LINE	L1	2.58496250072116	0	2.58496250072116	0.0499068048089534	up
chr18	90234152	90235122	971	chr18_90234152_90235122	Lx9	LINE/L1	LINE	L1	2.58496250072116	0	2.58496250072116	0.0491239335919203	up
chr8	23133520	23134765	1246	chr8_23133520_23134765	L2c	LINE/L2	LINE	L2	2.58496250072116	0	2.58496250072116	0.0491239335919203	up
chr8	5213227	5214292	1066	chr8_5213227_5214292	Lx3_Mus	LINE/L1	LINE	L1	2.58496250072116	0	2.58496250072116	0.0499166095994493	up
chr8	8261614	8262075	462	chr8_8261614_8262075	Lx9	LINE/L1	LINE	L1	2.58496250072116	0	2.58496250072116	0.0488722412984397	up
chr14	4346861	4347523	663	chr14_4346861_4347523	RLTR14-int	LTR/ERV1	LTR	ERV1	2.58496250072116	0	2.58496250072116	0.0499166095994493	up
chr15	69863058	69864657	1600	chr15_69863058_69864657	MTB_Mm-int	LTR/ERVL-MaLR	LTR	ERVL-MaLR	2.58496250072116	0	2.58496250072116	0.0499068048089534	up
chr15	90300410	90302214	1805	chr15_90300410_90302214	MTA_Mm-int	LTR/ERVL-MaLR	LTR	ERVL-MaLR	2.58496250072116	0	2.58496250072116	0.049119068966745	up
chr18	62743561	62743611	51	chr18_62743561_62743611	RLTR20C2_MM	LTR/ERVK	LTR	ERVK	2.58496250072116	0	2.58496250072116	0.0488722412984397	up
chr2	111438986	111441130	2145	chr2_111438986_111441130	ETnERV3-int	LTR/ERVK	LTR	ERVK	2.58496250072116	0	2.58496250072116	0.0491239335919203	up
chr4	65932264	65933876	1613	chr4_65932264_65933876	MTA_Mm-int	LTR/ERVL-MaLR	LTR	ERVL-MaLR	2.58496250072116	0	2.58496250072116	0.0488722412984397	up
chr8	47293340	47293453	114	chr8_47293340_47293453	RLTR20A4	LTR/ERVK	LTR	ERVK	2.58496250072116	0	2.58496250072116	0.0499166095994493	up
chr10	128275698	128276074	377	chr10_128275698_128276074	B2_Mm2	SINE/B2	SINE	B2	2.58496250072116	0	2.58496250072116	0.049119068966745	up
chr10	69082251	69082408	158	chr10_69082251_69082408	RSINE1	SINE/B4	SINE	B4	2.58496250072116	0	2.58496250072116	0.049119068966745	up
chr13	56787891	56788841	951	chr13_56787891_56788841	RSINE1	SINE/B4	SINE	B4	2.58496250072116	0	2.58496250072116	0.0499068048089534	up
chr9	67058256	67058313	58	chr9_67058256_67058313	RLTR20A4	LTR/ERVK	LTR	ERVK	3.64385618977472	1	2.64385618977472	0.041503071989517	up
chr2	162808442	162808758	317	chr2_162808442_162808758	MER33	DNA/hAT-Charlie	DNA	hAT-Charlie	2.70043971814109	0	2.70043971814109	0.0492587325377212	up
chr4	19520324	19521495	1172	chr4_19520324_19521495	RCHARR1	DNA/hAT-Charlie	DNA	hAT-Charlie	2.70043971814109	0	2.70043971814109	0.0492587325377212	up
chr1	134666505	134667244	740	chr1_134666505_134667244	L3b	LINE/CR1	LINE	CR1	2.70043971814109	0	2.70043971814109	0.0383764123048835	up
chr10	33548294	33549876	1583	chr10_33548294_33549876	L1MdV_II	LINE/L1	LINE	L1	2.70043971814109	0	2.70043971814109	0.0361504402602313	up
chr12	93393997	93396076	2080	chr12_93393997_93396076	L1Lx_IV	LINE/L1	LINE	L1	2.70043971814109	0	2.70043971814109	0.0361504402602313	up
chr12	94634150	94635450	1301	chr12_94634150_94635450	L1MdA_VII	LINE/L1	LINE	L1	2.70043971814109	0	2.70043971814109	0.0369633263012433	up
chr13	45710958	45713463	2506	chr13_45710958_45713463	L1MB5	LINE/L1	LINE	L1	2.70043971814109	0	2.70043971814109	0.0383764123048835	up
chr15	61379921	61380345	425	chr15_61379921_61380345	Lx8b	LINE/L1	LINE	L1	2.70043971814109	0	2.70043971814109	0.0369633263012433	up
chr5	86243514	86243934	421	chr5_86243514_86243934	L1MA4	LINE/L1	LINE	L1	2.70043971814109	0	2.70043971814109	0.0492587325377212	up
chr6	53934137	53934319	183	chr6_53934137_53934319	L2a	LINE/L2	LINE	L2	2.70043971814109	0	2.70043971814109	0.0492587325377212	up
chrX	19367576	19370407	2832	chrX_19367576_19370407	L1_Mur3	LINE/L1	LINE	L1	2.70043971814109	0	2.70043971814109	0.0383632178068819	up
chr13	92643156	92643325	170	chr13_92643156_92643325	MER74A	LTR/ERVL	LTR	ERVL	2.70043971814109	0	2.70043971814109	0.0492782020416594	up
chr15	51141805	51142251	447	chr15_51141805_51142251	RMER17C	LTR/ERVK	LTR	ERVK	2.70043971814109	0	2.70043971814109	0.03695410495243	up
chr16	67897119	67897826	708	chr16_67897119_67897826	RMER6C	LTR/ERVK	LTR	ERVK	3.70043971814109	1	2.70043971814109	0.0288076773829462	up
chr17	67434778	67434841	64	chr17_67434778_67434841	RLTR20A4	LTR/ERVK	LTR	ERVK	2.70043971814109	0	2.70043971814109	0.0369633263012433	up
chr19	25979805	25981155	1351	chr19_25979805_25981155	ORR1B2-int	LTR/ERVL-MaLR	LTR	ERVL-MaLR	2.70043971814109	0	2.70043971814109	0.0357695626176104	up
chr2	69812395	69813904	1510	chr2_69812395_69813904	ORR1C2-int	LTR/ERVL-MaLR	LTR	ERVL-MaLR	2.70043971814109	0	2.70043971814109	0.0492587325377212	up
chr4	84168063	84170755	2693	chr4_84168063_84170755	MTE2a-int	LTR/ERVL-MaLR	LTR	ERVL-MaLR	2.70043971814109	0	2.70043971814109	0.03695410495243	up
chr6	144593738	144593852	115	chr6_144593738_144593852	RLTR20A4	LTR/ERVK	LTR	ERVK	2.70043971814109	0	2.70043971814109	0.0492587325377212	up
chrX	75150447	75152609	2163	chrX_75150447_75152609	ORR1A2-int	LTR/ERVL-MaLR	LTR	ERVL-MaLR	2.70043971814109	0	2.70043971814109	0.0361504402602313	up
chr1	174749809	174749967	159	chr1_174749809_174749967	RSINE1	SINE/B4	SINE	B4	2.70043971814109	0	2.70043971814109	0.0357713741784872	up
chr1	184888480	184888649	170	chr1_184888480_184888649	B1_Mur1	SINE/Alu	SINE	Alu	2.70043971814109	0	2.70043971814109	0.0383764123048835	up
chr10	54062165	54062265	101	chr10_54062165_54062265	PB1D7	SINE/Alu	SINE	Alu	2.70043971814109	0	2.70043971814109	0.0357713741784872	up
chr13	64476734	64477014	281	chr13_64476734_64477014	B4	SINE/B4	SINE	B4	2.70043971814109	0	2.70043971814109	0.0492587325377212	up
chr16	6804476	6804876	401	chr16_6804476_6804876	B3A	SINE/B2	SINE	B2	2.70043971814109	0	2.70043971814109	0.0369633263012433	up
chr3	117518230	117519167	938	chr3_117518230_117519167	RSINE1	SINE/B4	SINE	B4	2.70043971814109	0	2.70043971814109	0.0383764123048835	up
chr6	80214699	80214883	185	chr6_80214699_80214883	B3A	SINE/B2	SINE	B2	2.70043971814109	0	2.70043971814109	0.0492587325377212	up
chr7	126159101	126159254	154	chr7_126159101_126159254	B1_Mur1	SINE/Alu	SINE	Alu	2.70043971814109	0	2.70043971814109	0.0492587325377212	up
chr4	48341830	48343589	1760	chr4_48341830_48343589	Lx6	LINE/L1	LINE	L1	2.8073549220576	0	2.8073549220576	0.0272751832929476	up
chr9	30041557	30041821	265	chr9_30041557_30041821	Lx7	LINE/L1	LINE	L1	2.8073549220576	0	2.8073549220576	0.0272833484634737	up
chr1	11549997	11551873	1877	chr1_11549997_11551873	MTA_Mm-int	LTR/ERVL-MaLR	LTR	ERVL-MaLR	2.8073549220576	0	2.8073549220576	0.0259284037080908	up
chr18	64408142	64409379	1238	chr18_64408142_64409379	ORR1D2-int	LTR/ERVL-MaLR	LTR	ERVL-MaLR	2.8073549220576	0	2.8073549220576	0.0259284037080908	up
chr4	114574891	114575873	983	chr4_114574891_114575873	ERVL-int	LTR/ERVL	LTR	ERVL	2.8073549220576	0	2.8073549220576	0.0260648067871271	up
chr8	41797876	41798385	510	chr8_41797876_41798385	MT2A	LTR/ERVL	LTR	ERVL	2.8073549220576	0	2.8073549220576	0.0272833484634737	up
chr7	134235640	134237134	1495	chr7_134235640_134237134	L1MC5	LINE/L1	LINE	L1	2.90689059560852	0	2.90689059560852	0.0189764856250447	up
chr10	52824494	52824606	113	chr10_52824494_52824606	RLTR31D_MM	LTR/ERVK	LTR	ERVK	2.90689059560852	0	2.90689059560852	0.018773168401338	up
chr13	42522704	42524036	1333	chr13_42522704_42524036	ORR1C2-int	LTR/ERVL-MaLR	LTR	ERVL-MaLR	2.90689059560852	0	2.90689059560852	0.0212254453921829	up
chr17	73458519	73458821	303	chr17_73458519_73458821	ORR1F	LTR/ERVL-MaLR	LTR	ERVL-MaLR	2.90689059560852	0	2.90689059560852	0.0212254453921829	up
chr7	129663315	129663366	52	chr7_129663315_129663366	RLTR20C1_MM	LTR/ERVK	LTR	ERVK	2.90689059560852	0	2.90689059560852	0.0201176378815882	up
chr4	100062378	100062616	239	chr4_100062378_100062616	B3A	SINE/B2	SINE	B2	2.90689059560852	0	2.90689059560852	0.0189764856250447	up
chr8	112147221	112147460	240	chr8_112147221_112147460	B4	SINE/B4	SINE	B4	2.90689059560852	0	2.90689059560852	0.0189793547198665	up
chr9	68261674	68261875	202	chr9_68261674_68261875	ID_B1	SINE/B4	SINE	B4	2.90689059560852	0	2.90689059560852	0.0194006829983999	up
chr8	14729314	14729410	97	chr8_14729314_14729410	Tigger17	DNA/TcMar-Tigger	DNA	TcMar-Tigger	3.58496250072116	0.584962500721156	3	0.0304650746988255	up
chr11	63723712	63725774	2063	chr11_63723712_63725774	Lx8b	LINE/L1	LINE	L1	3	0	3	0.0148822988212167	up
chr12	93401670	93404311	2642	chr12_93401670_93404311	Lx2B2	LINE/L1	LINE	L1	3	0	3	0.0148880684278585	up
chr6	73767506	73770903	3398	chr6_73767506_73770903	L1MA5A	LINE/L1	LINE	L1	3	0	3	0.0148822988212167	up
chrX	136604171	136605541	1371	chrX_136604171_136605541	Lx6	LINE/L1	LINE	L1	3	0	3	0.0138522288439117	up
chr17	76973097	76974008	912	chr17_76973097_76974008	MT-int	LTR/ERVL-MaLR	LTR	ERVL-MaLR	3.58496250072116	0.584962500721156	3	0.0258851333227815	up
chr4	111438851	111438910	60	chr4_111438851_111438910	RLTR20A4	LTR/ERVK	LTR	ERVK	3	0	3	0.0148880684278585	up
chr1	128736712	128736893	182	chr1_128736712_128736893	B2_Mm2	SINE/B2	SINE	B2	3	0	3	0.0148880684278585	up
chrX	36714137	36714323	187	chrX_36714137_36714323	B3A	SINE/B2	SINE	B2	3	0	3	0.0138522288439117	up
chr1	48403781	48405116	1336	chr1_48403781_48405116	Lx6	LINE/L1	LINE	L1	3.08746284125034	0	3.08746284125034	0.0105343165844414	up
chr10	6225896	6228049	2154	chr10_6225896_6228049	Lx8	LINE/L1	LINE	L1	3.08746284125034	0	3.08746284125034	0.0229630207357022	up
chr11	35657555	35658768	1214	chr11_35657555_35658768	Lx8	LINE/L1	LINE	L1	3.08746284125034	0	3.08746284125034	0.0463182365746984	up
chr11	56368605	56371453	2849	chr11_56368605_56371453	L1MDa	LINE/L1	LINE	L1	3.08746284125034	0	3.08746284125034	0.0229630207357022	up
chr6	133333136	133335023	1888	chr6_133333136_133335023	Lx5c	LINE/L1	LINE	L1	3.08746284125034	0	3.08746284125034	0.0098341986131598	up
chr18	86878314	86878375	62	chr18_86878314_86878375	RLTR20A4	LTR/ERVK	LTR	ERVK	3.08746284125034	0	3.08746284125034	0.00983467485770331	up
chr2	40534207	40536662	2456	chr2_40534207_40536662	RodERV21-int	LTR/ERV1	LTR	ERV1	3.08746284125034	0	3.08746284125034	0.0480163518828436	up
chr1	9874161	9874992	832	chr1_9874161_9874992	ID_B1	SINE/B4	SINE	B4	3.08746284125034	0	3.08746284125034	0.0463140169361007	up
chr12	118000718	118001014	297	chr12_118000718_118001014	B4	SINE/B4	SINE	B4	3.08746284125034	0	3.08746284125034	0.0098341986131598	up
chr1	72319817	72321952	2136	chr1_72319817_72321952	Lx8	LINE/L1	LINE	L1	3.16992500144231	0	3.16992500144231	0.00719006553577311	up
chr14	80481573	80482366	794	chr14_80481573_80482366	Lx5	LINE/L1	LINE	L1	3.16992500144231	0	3.16992500144231	0.0244180848810897	up
chr15	40298673	40300427	1755	chr15_40298673_40300427	Lx7	LINE/L1	LINE	L1	3.16992500144231	0	3.16992500144231	0.0380126955474479	up
chr8	14729745	14729835	91	chr8_14729745_14729835	L1P5	LINE/L1	LINE	L1	3.16992500144231	0	3.16992500144231	0.00751959872133467	up
chr14	87178853	87178912	60	chr14_87178853_87178912	RLTR20A4	LTR/ERVK	LTR	ERVK	3.16992500144231	0	3.16992500144231	0.00718939312002171	up
chr9	32286774	32286834	61	chr9_32286774_32286834	RLTR20A4	LTR/ERVK	LTR	ERVK	3.16992500144231	0	3.16992500144231	0.0411471846761974	up
chr14	6852399	6852611	213	chr14_6852399_6852611	ID_B1	SINE/B4	SINE	B4	3.16992500144231	0	3.16992500144231	0.00714780351887469	up
chr6	136919210	136919394	185	chr6_136919210_136919394	ID_B1	SINE/B4	SINE	B4	3.16992500144231	0	3.16992500144231	0.00846847704199825	up
chr9	70835065	70835183	119	chr9_70835065_70835183	RSINE1	SINE/B4	SINE	B4	3.16992500144231	0	3.16992500144231	0.0244324886321702	up
chr8	14729202	14729295	94	chr8_14729202_14729295	Tigger17	DNA/TcMar-Tigger	DNA	TcMar-Tigger	3.24792751344359	0	3.24792751344359	0.0309434394057969	up
chrX	99268133	99268570	438	chrX_99268133_99268570	L1MdMus_I	LINE/L1	LINE	L1	3.24792751344359	0	3.24792751344359	0.0255995113203065	up
chr12	44817218	44818068	851	chr12_44817218_44818068	RMER19B	LTR/ERVK	LTR	ERVK	3.24792751344359	0	3.24792751344359	0.0054238291032715	up
chr16	73252164	73253142	979	chr16_73252164_73253142	RMER17A	LTR/ERVK	LTR	ERVK	3.24792751344359	0	3.24792751344359	0.0255995113203065	up
chr2	169333919	169334540	622	chr2_169333919_169334540	L2a	LINE/L2	LINE	L2	3.32192809488736	0	3.32192809488736	0.00406575837894392	up
chr9	113800179	113800688	510	chr9_113800179_113800688	L2	LINE/L2	LINE	L2	3.32192809488736	0	3.32192809488736	0.00395623817628991	up
chrX	116079202	116084082	4881	chrX_116079202_116084082	Lx3C	LINE/L1	LINE	L1	3.32192809488736	0	3.32192809488736	0.010972429036158	up
chr15	40300429	40300980	552	chr15_40300429_40300980	RLTR34B_MM	LTR/ERVK	LTR	ERVK	3.32192809488736	0	3.32192809488736	0.00406575837894392	up
chr16	85471009	85471187	179	chr16_85471009_85471187	RLTR17B_Mm	LTR/ERVK	LTR	ERVK	3.32192809488736	0	3.32192809488736	0.00389094595339352	up
chr3	113195451	113197774	2324	chr3_113195451_113197774	MuRRS-int	LTR/ERV1	LTR	ERV1	3.32192809488736	0	3.32192809488736	0.0406458980515186	up
chr7	6572952	6574087	1136	chr7_6572952_6574087	RMER17C-int	LTR/ERVK	LTR	ERVK	3.32192809488736	0	3.32192809488736	0.010972429036158	up
chr14	96063425	96064628	1204	chr14_96063425_96064628	Lx6	LINE/L1	LINE	L1	3.39231742277876	0	3.39231742277876	0.0120675882992045	up
chr15	73823639	73824643	1005	chr15_73823639_73824643	L1MdF_III	LINE/L1	LINE	L1	3.39231742277876	0	3.39231742277876	0.0210588761306661	up
chr9	115436298	115438703	2406	chr9_115436298_115438703	MTC-int	LTR/ERVL-MaLR	LTR	ERVL-MaLR	3.39231742277876	0	3.39231742277876	0.0328853200450937	up
chr13	101350042	101350254	213	chr13_101350042_101350254	B3A	SINE/B2	SINE	B2	3.39231742277876	0	3.39231742277876	0.0029203406383242	up
chr1	109400546	109403548	3003	chr1_109400546_109403548	Lx3_Mus	LINE/L1	LINE	L1	3.4594316186373	0	3.4594316186373	0.00217126737861004	up
chrX	116074745	116079062	4318	chrX_116074745_116079062	Lx2B2	LINE/L1	LINE	L1	3.4594316186373	0	3.4594316186373	0.034718286091693	up
chr2	101523752	101524850	1099	chr2_101523752_101524850	B3	SINE/B2	SINE	B2	3.4594316186373	0	3.4594316186373	0.00218251721861611	up
chr18	71291894	71291951	58	chr18_71291894_71291951	RLTR20A4	LTR/ERVK	LTR	ERVK	3.58496250072116	0	3.58496250072116	0.00144058235801015	up
chr9	9090741	9090890	150	chr9_9090741_9090890	B3A	SINE/B2	SINE	B2	3.58496250072116	0	3.58496250072116	0.0163402686949417	up
chr12	112349484	112351774	2291	chr12_112349484_112351774	L1MEg	LINE/L1	LINE	L1	3.64385618977472	0	3.64385618977472	0.0462421093927709	up
chr13	18878639	18880059	1421	chr13_18878639_18880059	Lx4A	LINE/L1	LINE	L1	3.64385618977472	0	3.64385618977472	0.0155237674430524	up
chr4	33770359	33774879	4521	chr4_33770359_33774879	Lx5b	LINE/L1	LINE	L1	3.64385618977472	0	3.64385618977472	0.0109953636033729	up
chr7	26894804	26895875	1072	chr7_26894804_26895875	RodERV21-int	LTR/ERV1	LTR	ERV1	3.64385618977472	0	3.64385618977472	0.000984942465274915	up
chr9	55574421	55575622	1202	chr9_55574421_55575622	RCHARR1	DNA/hAT-Charlie	DNA	hAT-Charlie	3.70043971814109	0	3.70043971814109	0.0117793109582898	up
chr1	51930209	51930460	252	chr1_51930209_51930460	B3A	SINE/B2	SINE	B2	3.70043971814109	0	3.70043971814109	0.000786252561466873	up
chr16	70145944	70146036	93	chr16_70145944_70146036	Tigger17	DNA/TcMar-Tigger	DNA	TcMar-Tigger	3.75488750216347	0	3.75488750216347	0.00751597582582434	up
chr6	140034069	140037194	3126	chr6_140034069_140037194	L1MB1	LINE/L1	LINE	L1	3.75488750216347	0	3.75488750216347	0.0207153255440862	up
chr11	91728312	91729506	1195	chr11_91728312_91729506	L1MA8	LINE/L1	LINE	L1	3.8073549220576	0	3.8073549220576	0.00383131843622111	up
chr5	125232274	125232550	277	chr5_125232274_125232550	PB1D9	SINE/Alu	SINE	Alu	4.4262647547021	0.584962500721156	3.84130225398094	0.0453362265118467	up
chr1	20848969	20849275	307	chr1_20848969_20849275	B1_Mus1	SINE/Alu	SINE	Alu	3.85798099512757	0	3.85798099512757	0.00570963442571649	up
chr17	76190501	76190582	82	chr17_76190501_76190582	RSINE1	SINE/B4	SINE	B4	3.85798099512757	0	3.85798099512757	0.000426305108896527	up
chr16	14073141	14073236	96	chr16_14073141_14073236	B1_Mus2	SINE/Alu	SINE	Alu	3.90689059560852	0	3.90689059560852	0.0182029450630748	up
chr4	144835128	144835208	81	chr4_144835128_144835208	Lx2B2	LINE/L1	LINE	L1	4.04439411935845	0	4.04439411935845	0.000189843811994979	up
chr4	144835544	144835624	81	chr4_144835544_144835624	Lx2B2	LINE/L1	LINE	L1	4.04439411935845	0	4.04439411935845	0.00389015256477615	up
chr4	144835232	144835312	81	chr4_144835232_144835312	L1_Mur1	LINE/L1	LINE	L1	4.64385618977472	0.584962500721156	4.05889368905357	0.000186321722356944	up
chr14	91132860	91133626	767	chr14_91132860_91133626	RMER17A	LTR/ERVK	LTR	ERVK	4.08746284125034	0	4.08746284125034	0.0260556965868745	up
chr8	14729654	14729744	91	chr8_14729654_14729744	Tigger17	DNA/TcMar-Tigger	DNA	TcMar-Tigger	4.12928301694497	0	4.12928301694497	0.000127552017191071	up
chr17	5620777	5621002	226	chr17_5620777_5621002	L1ME3A	LINE/L1	LINE	L1	4.12928301694497	0	4.12928301694497	0.000114073676916198	up
chr5	125232092	125232270	179	chr5_125232092_125232270	RMER17D2	LTR/ERVK	LTR	ERVK	4.12928301694497	0	4.12928301694497	0.0315944696052843	up
chr10	34353759	34355042	1284	chr10_34353759_34355042	B2_Mm2	SINE/B2	SINE	B2	5.16992500144231	1	4.16992500144231	0.00164002050085036	up
chr4	144835336	144835416	81	chr4_144835336_144835416	Lx2B2	LINE/L1	LINE	L1	4.78135971352466	0.584962500721156	4.1963972128035	0.00535264645719809	up
chr4	144835882	144835962	81	chr4_144835882_144835962	L1_Mur1	LINE/L1	LINE	L1	5.24792751344359	1	4.24792751344359	0.0454923634822544	up
chr4	144835440	144835520	81	chr4_144835440_144835520	L1_Mur1	LINE/L1	LINE	L1	4.35755200461808	0	4.35755200461808	0.00111721033254534	up
chr16	70146198	70146288	91	chr16_70146198_70146288	Tigger17	DNA/TcMar-Tigger	DNA	TcMar-Tigger	4.4262647547021	0	4.4262647547021	0.0000334165720880198	up
chr5	141711477	141711834	358	chr5_141711477_141711834	B1_Mur2	SINE/Alu	SINE	Alu	4.4262647547021	0	4.4262647547021	0.00190148752520715	up
chr1	165353713	165353901	189	chr1_165353713_165353901	B3	SINE/B2	SINE	B2	4.4594316186373	0	4.4594316186373	0.0000244619192290588	up
chr14	63280151	63280255	105	chr14_63280151_63280255	PB1D9	SINE/Alu	SINE	Alu	4.61470984411521	0	4.61470984411521	0.0463490312503928	up
chr15	23114557	23115351	795	chr15_23114557_23115351	Lx10	LINE/L1	LINE	L1	4.64385618977472	0	4.64385618977472	0.0312751892632896	up
chr16	10330143	10330284	142	chr16_10330143_10330284	B1_Mur1	SINE/Alu	SINE	Alu	4.7279204545632	0	4.7279204545632	6.77561664270876E-06	up

## Sheet: Tet2--LPS vs Tet2-- p<0.05
Table S1. Differentially H3K9me3 enriched TEs in Tet2-/- LPS vs Tet2-/- pvalue<0.05
seqnames	start	end	width	range	ID	comb_ClassFamily	Class	Familly	log2(Conc_TET2_LPS)	log2(Conc_TET2)	log2 Fold	p.value	status
chr7	29863990	29866891	2902	chr7_29863990_29866891	RMER15-int	LTR/ERVL	LTR	ERVL	0	4.8073549220576	-4.8073549220576	0.00342793971171891	down
chr14	118802114	118802243	130	chr14_118802114_118802243	RLTR17B_Mm	LTR/ERVK	LTR	ERVK	0	4.78135971352466	-4.78135971352466	0.0145597627924676	down
chr1	160998165	160998318	154	chr1_160998165_160998318	B3A	SINE/B2	SINE	B2	0	4.35755200461808	-4.35755200461808	0.042041215782703	down
chr15	91140434	91141703	1270	chr15_91140434_91141703	L1MB2	LINE/L1	LINE	L1	0	4	-4	0.0189674856584359	down
chr4	127650126	127651978	1853	chr4_127650126_127651978	Charlie7	DNA/hAT-Charlie	DNA	hAT-Charlie	0	3.95419631038688	-3.95419631038688	0.0222821128854449	down
chr17	4376738	4376792	55	chr17_4376738_4376792	RLTR20C1_MM	LTR/ERVK	LTR	ERVK	0	3.90689059560852	-3.90689059560852	0.00459736898743032	down
chr3	46207391	46213799	6409	chr3_46207391_46213799	L1MdV_III	LINE/L1	LINE	L1	0	3.85798099512757	-3.85798099512757	0.0071691572625223	down
chr4	144835752	144835881	130	chr4_144835752_144835881	Lx2B2	LINE/L1	LINE	L1	0	3.85798099512757	-3.85798099512757	0.0309117832649917	down
chr15	95124426	95125419	994	chr15_95124426_95125419	Lx8b	LINE/L1	LINE	L1	0	3.70043971814109	-3.70043971814109	0.0096507680380001	down
chr5	133667906	133668015	110	chr5_133667906_133668015	RLTR31D_MM	LTR/ERVK	LTR	ERVK	0	3.70043971814109	-3.70043971814109	0.00294093895093196	down
chr11	82504219	82507246	3028	chr11_82504219_82507246	ORR1B1-int	LTR/ERVL-MaLR	LTR	ERVL-MaLR	0	3.64385618977472	-3.64385618977472	0.0155626337106122	down
chr18	18955999	18956594	596	chr18_18955999_18956594	RMER20B	LTR/ERVK	LTR	ERVK	0	3.58496250072116	-3.58496250072116	0.0293026340478929	down
chr7	126899241	126900546	1306	chr7_126899241_126900546	L1M3	LINE/L1	LINE	L1	0	3.58496250072116	-3.58496250072116	0.0292718585588781	down
chr3	94852866	94853142	277	chr3_94852866_94853142	B4A	SINE/B4	SINE	B4	0	3.52356195605701	-3.52356195605701	0.012235468166616	down
chr4	30504900	30510078	5179	chr4_30504900_30510078	L1MdF_IV	LINE/L1	LINE	L1	0.584962500721156	4.08746284125034	-3.50250034052918	0.00283331653647116	down
chr13	34397097	34397399	303	chr13_34397097_34397399	B4A	SINE/B4	SINE	B4	0	3.4594316186373	-3.4594316186373	0.0131744095885013	down
chr4	142195161	142195212	52	chr4_142195161_142195212	PB1D9	SINE/Alu	SINE	Alu	0	3.4594316186373	-3.4594316186373	0.0282291293349958	down
chr4	31259939	31260089	151	chr4_31259939_31260089	ORR1F	LTR/ERVL-MaLR	LTR	ERVL-MaLR	0	3.4594316186373	-3.4594316186373	0.0131744095885013	down
chr6	140482618	140483087	470	chr6_140482618_140483087	ORR1D-int	LTR/ERVL-MaLR	LTR	ERVL-MaLR	0	3.39231742277876	-3.39231742277876	0.0145535741321708	down
chr6	60307874	60310321	2448	chr6_60307874_60310321	Lx2B2	LINE/L1	LINE	L1	0	3.39231742277876	-3.39231742277876	0.0153513104677565	down
chrX	150828265	150828497	233	chrX_150828265_150828497	MIR	SINE/MIR	SINE	MIR	0	3.39231742277876	-3.39231742277876	0.0120942447096286	down
chr15	78079870	78080035	166	chr15_78079870_78080035	B3A	SINE/B2	SINE	B2	0	3.32192809488736	-3.32192809488736	0.017120761638072	down
chr9	75880172	75883681	3510	chr9_75880172_75883681	Lx9	LINE/L1	LINE	L1	0	3.24792751344359	-3.24792751344359	0.025641991938491	down
chrX	115137358	115138886	1529	chrX_115137358_115138886	Lx2	LINE/L1	LINE	L1	0	3.24792751344359	-3.24792751344359	0.0288526193205762	down
chr5	35742595	35742896	302	chr5_35742595_35742896	B1_Mur2	SINE/Alu	SINE	Alu	0.584962500721156	3.8073549220576	-3.22239242133645	0.00683580244027026	down
chr13	118829126	118829252	127	chr13_118829126_118829252	B4A	SINE/B4	SINE	B4	0	3.16992500144231	-3.16992500144231	0.0288902411366618	down
chr15	78080058	78080206	149	chr15_78080058_78080206	MIRb	SINE/MIR	SINE	MIR	0	3.16992500144231	-3.16992500144231	0.0252097573736989	down
chr16	71819133	71820573	1441	chr16_71819133_71820573	L1_Mur3	LINE/L1	LINE	L1	0	3.16992500144231	-3.16992500144231	0.0234115291357194	down
chr16	78660512	78660571	60	chr16_78660512_78660571	RLTR20A4	LTR/ERVK	LTR	ERVK	0	3.16992500144231	-3.16992500144231	0.00271039063541132	down
chr3	102541824	102541972	149	chr3_102541824_102541972	ORR1F	LTR/ERVL-MaLR	LTR	ERVL-MaLR	0	3.16992500144231	-3.16992500144231	0.0267257093164298	down
chr3	103663905	103664296	392	chr3_103663905_103664296	MTC	LTR/ERVL-MaLR	LTR	ERVL-MaLR	0	3.16992500144231	-3.16992500144231	0.0244749555449448	down
chr5	51301702	51302110	409	chr5_51301702_51302110	RMER10A	LTR/ERVL	LTR	ERVL	0	3.16992500144231	-3.16992500144231	0.00303596345811509	down
chrX	152737243	152737413	171	chrX_152737243_152737413	B4A	SINE/B4	SINE	B4	0	3.16992500144231	-3.16992500144231	0.0288902411366618	down
chr1	177303732	177304057	326	chr1_177303732_177304057	B1_Mus1	SINE/Alu	SINE	Alu	0	3.08746284125034	-3.08746284125034	0.0474523870658357	down
chr18	21893556	21893827	272	chr18_21893556_21893827	Lx10	LINE/L1	LINE	L1	0	3.08746284125034	-3.08746284125034	0.0230052614747322	down
chr3	42616647	42616780	134	chr3_42616647_42616780	ORR1C2	LTR/ERVL-MaLR	LTR	ERVL-MaLR	0	3.08746284125034	-3.08746284125034	0.031777536792193	down
chr6	140411364	140411693	330	chr6_140411364_140411693	B1_Mur4	SINE/Alu	SINE	Alu	0	3.08746284125034	-3.08746284125034	0.0474523870658357	down
chr11	85857911	85857984	74	chr11_85857911_85857984	RLTR31D_MM	LTR/ERVK	LTR	ERVK	0	3	-3	0.0407613392658527	down
chr14	102342614	102343157	544	chr14_102342614_102343157	Lx5	LINE/L1	LINE	L1	0	3	-3	0.00567327430415136	down
chr17	50346168	50346243	76	chr17_50346168_50346243	RLTR20A4	LTR/ERVK	LTR	ERVK	0.584962500721156	3.58496250072116	-3	0.0196735544958708	down
chr2	162067599	162067657	59	chr2_162067599_162067657	RLTR20A4	LTR/ERVK	LTR	ERVK	0	3	-3	0.0212783199693577	down
chr7	64015534	64015699	166	chr7_64015534_64015699	B3	SINE/B2	SINE	B2	0	3	-3	0.0212783199693577	down
chr12	41104934	41107226	2293	chr12_41104934_41107226	ORR1C2-int	LTR/ERVL-MaLR	LTR	ERVL-MaLR	0	2.90689059560852	-2.90689059560852	0.0459317140522442	down
chr2	11110318	11110489	172	chr2_11110318_11110489	RSINE1	SINE/B4	SINE	B4	0	2.90689059560852	-2.90689059560852	0.0192997619042852	down
chr2	80840756	80840989	234	chr2_80840756_80840989	RSINE1	SINE/B4	SINE	B4	0	2.90689059560852	-2.90689059560852	0.0439670628355387	down
chrX	150828550	150828618	69	chrX_150828550_150828618	L2c	LINE/L2	LINE	L2	0	2.90689059560852	-2.90689059560852	0.00767310583921496	down
chrX	153239095	153239766	672	chrX_153239095_153239766	B1_Mus1	SINE/Alu	SINE	Alu	0	2.90689059560852	-2.90689059560852	0.0489697738305004	down
chr12	12713178	12713975	798	chr12_12713178_12713975	B4	SINE/B4	SINE	B4	0.584962500721156	3.39231742277876	-2.8073549220576	0.0337681179555757	down
chr15	34697539	34699331	1793	chr15_34697539_34699331	Charlie1a	DNA/hAT-Charlie	DNA	hAT-Charlie	0.584962500721156	3.39231742277876	-2.8073549220576	0.0312799863103176	down
chr18	4004603	4004826	224	chr18_4004603_4004826	B4A	SINE/B4	SINE	B4	0	2.8073549220576	-2.8073549220576	0.0168868058467152	down
chr5	107454603	107454731	129	chr5_107454603_107454731	MER2	DNA/TcMar-Tigger	DNA	TcMar-Tigger	0	2.8073549220576	-2.8073549220576	0.010601131943084	down
chr8	112638875	112639032	158	chr8_112638875_112639032	B3A	SINE/B2	SINE	B2	0	2.8073549220576	-2.8073549220576	0.0168868058467152	down
chr5	132064527	132065277	751	chr5_132064527_132065277	L1MdA_VII	LINE/L1	LINE	L1	0.584962500721156	3.32192809488736	-2.73696559416621	0.0491968872734092	down
chr10	99655011	99655251	241	chr10_99655011_99655251	B3A	SINE/B2	SINE	B2	0	2.70043971814109	-2.70043971814109	0.015804455472997	down
chr2	139375474	139375618	145	chr2_139375474_139375618	Lx9	LINE/L1	LINE	L1	0	2.70043971814109	-2.70043971814109	0.015804455472997	down
chr5	65235843	65235971	129	chr5_65235843_65235971	RLTR20C1_MM	LTR/ERVK	LTR	ERVK	0	2.70043971814109	-2.70043971814109	0.0493471024467261	down
chr5	90101946	90102019	74	chr5_90101946_90102019	RLTR20A4	LTR/ERVK	LTR	ERVK	0	2.70043971814109	-2.70043971814109	0.0157880464367656	down
chr8	67845419	67845659	241	chr8_67845419_67845659	B4	SINE/B4	SINE	B4	0	2.70043971814109	-2.70043971814109	0.0157880464367656	down
chrX	103753913	103754124	212	chrX_103753913_103754124	B4A	SINE/B4	SINE	B4	0	2.70043971814109	-2.70043971814109	0.0492934605410495	down
chr1	127051863	127058600	6738	chr1_127051863_127058600	Lx5c	LINE/L1	LINE	L1	0	2.58496250072116	-2.58496250072116	0.0213296636396151	down
chr1	152142903	152143059	157	chr1_152142903_152143059	B3A	SINE/B2	SINE	B2	0	2.58496250072116	-2.58496250072116	0.0473490094740381	down
chr14	24790373	24790786	414	chr14_24790373_24790786	MTD	LTR/ERVL-MaLR	LTR	ERVL-MaLR	0	2.58496250072116	-2.58496250072116	0.0223568794405952	down
chr18	4004422	4004485	64	chr18_4004422_4004485	RLTR20A4	LTR/ERVK	LTR	ERVK	0	2.58496250072116	-2.58496250072116	0.0223568794405952	down
chr18	68121642	68121792	151	chr18_68121642_68121792	B3A	SINE/B2	SINE	B2	0	2.58496250072116	-2.58496250072116	0.0473490094740381	down
chr18	68121793	68122015	223	chr18_68121793_68122015	B4	SINE/B4	SINE	B4	0	2.58496250072116	-2.58496250072116	0.0473490094740381	down
chr2	139990278	139990546	269	chr2_139990278_139990546	MLT1A0	LTR/ERVL-MaLR	LTR	ERVL-MaLR	0	2.58496250072116	-2.58496250072116	0.0473490094740381	down
chr2	171120201	171120635	435	chr2_171120201_171120635	ID_B1	SINE/B4	SINE	B4	0	2.58496250072116	-2.58496250072116	0.0223568794405952	down
chr3	108771422	108771523	102	chr3_108771422_108771523	PB1D7	SINE/Alu	SINE	Alu	0	2.58496250072116	-2.58496250072116	0.0223360190130164	down
chr3	41948821	41949059	239	chr3_41948821_41949059	B4A	SINE/B4	SINE	B4	0	2.58496250072116	-2.58496250072116	0.0223568794405952	down
chr5	139133128	139133277	150	chr5_139133128_139133277	RSINE1	SINE/B4	SINE	B4	0	2.58496250072116	-2.58496250072116	0.0473490094740381	down
chr7	27558249	27558356	108	chr7_27558249_27558356	ID_B1	SINE/B4	SINE	B4	0	2.58496250072116	-2.58496250072116	0.0213296636396151	down
chr8	72990086	72990215	130	chr8_72990086_72990215	B4A	SINE/B4	SINE	B4	0	2.58496250072116	-2.58496250072116	0.0223568794405952	down
chr9	46678599	46678661	63	chr9_46678599_46678661	RSINE1	SINE/B4	SINE	B4	0	2.58496250072116	-2.58496250072116	0.0213296636396151	down
chr12	56378220	56378801	582	chr12_56378220_56378801	B1_Mus1	SINE/Alu	SINE	Alu	2.4594316186373	4.95419631038687	-2.49476469174958	0.00421356083581811	down
chr11	26212575	26219501	6927	chr11_26212575_26219501	L1MdV_II	LINE/L1	LINE	L1	0	2.4594316186373	-2.4594316186373	0.0320868598270804	down
chr11	63726440	63726528	89	chr11_63726440_63726528	MER63D	DNA/hAT-Blackjack	DNA	hAT-Blackjack	0	2.4594316186373	-2.4594316186373	0.0445042694473118	down
chr12	52992530	52992585	56	chr12_52992530_52992585	RLTR20C1_MM	LTR/ERVK	LTR	ERVK	0	2.4594316186373	-2.4594316186373	0.0444367517777857	down
chr13	100996517	100996588	72	chr13_100996517_100996588	RLTR20A4	LTR/ERVK	LTR	ERVK	0	2.4594316186373	-2.4594316186373	0.0445042694473118	down
chr13	18450413	18450687	275	chr13_18450413_18450687	MLT1A	LTR/ERVL-MaLR	LTR	ERVL-MaLR	0	2.4594316186373	-2.4594316186373	0.0308953380642019	down
chr13	18570084	18571224	1141	chr13_18570084_18571224	Lx9	LINE/L1	LINE	L1	0	2.4594316186373	-2.4594316186373	0.0445042694473118	down
chr13	77357903	77360417	2515	chr13_77357903_77360417	L1_Mur1	LINE/L1	LINE	L1	0	2.4594316186373	-2.4594316186373	0.0445042694473118	down
chr14	20153303	20153563	261	chr14_20153303_20153563	B4A	SINE/B4	SINE	B4	0	2.4594316186373	-2.4594316186373	0.0320608954320458	down
chr18	19367007	19371200	4194	chr18_19367007_19371200	IAPEY3-int	LTR/ERVK	LTR	ERVK	0	2.4594316186373	-2.4594316186373	0.0303842075586091	down
chr2	53874374	53875363	990	chr2_53874374_53875363	Lx5b	LINE/L1	LINE	L1	0	2.4594316186373	-2.4594316186373	0.0320608954320458	down
chr3	35680459	35680512	54	chr3_35680459_35680512	RLTR20C1_MM	LTR/ERVK	LTR	ERVK	0	2.4594316186373	-2.4594316186373	0.0320868598270804	down
chr3	44483063	44483458	396	chr3_44483063_44483458	MTA_Mm	LTR/ERVL-MaLR	LTR	ERVL-MaLR	0	2.4594316186373	-2.4594316186373	0.0444367517777857	down
chr6	95207351	95209248	1898	chr6_95207351_95209248	L1MC	LINE/L1	LINE	L1	0	2.4594316186373	-2.4594316186373	0.0320608954320458	down
chr8	13327648	13328113	466	chr8_13327648_13328113	B4A	SINE/B4	SINE	B4	1.58496250072116	3.95419631038688	-2.36923380966572	0.0456065594153857	down
chr1	100775567	100775701	135	chr1_100775567_100775701	B1_Mm	SINE/Alu	SINE	Alu	0	2.32192809488736	-2.32192809488736	0.0487822745673864	down
chr1	174815078	174815675	598	chr1_174815078_174815675	Lx2B2	LINE/L1	LINE	L1	0	2.32192809488736	-2.32192809488736	0.0487822745673864	down
chr1	97168804	97168950	147	chr1_97168804_97168950	B1_Mus2	SINE/Alu	SINE	Alu	0	2.32192809488736	-2.32192809488736	0.0463964358384031	down
chr10	118884035	118885248	1214	chr10_118884035_118885248	L2a	LINE/L2	LINE	L2	0	2.32192809488736	-2.32192809488736	0.0463964358384031	down
chr10	44079992	44080115	124	chr10_44079992_44080115	ID_B1	SINE/B4	SINE	B4	0	2.32192809488736	-2.32192809488736	0.0451709794082261	down
chr10	51717348	51717483	136	chr10_51717348_51717483	B1_Mus1	SINE/Alu	SINE	Alu	0	2.32192809488736	-2.32192809488736	0.0487822745673864	down
chr11	105425704	105425836	133	chr11_105425704_105425836	RSINE1	SINE/B4	SINE	B4	0	2.32192809488736	-2.32192809488736	0.0487822745673864	down
chr11	15193757	15194702	946	chr11_15193757_15194702	B1F	SINE/Alu	SINE	Alu	0	2.32192809488736	-2.32192809488736	0.048829743930823	down
chr12	118494616	118494942	327	chr12_118494616_118494942	B4	SINE/B4	SINE	B4	0	2.32192809488736	-2.32192809488736	0.0463656270839443	down
chr12	60042071	60042463	393	chr12_60042071_60042463	MTA_Mm	LTR/ERVL-MaLR	LTR	ERVL-MaLR	0	2.32192809488736	-2.32192809488736	0.0447879885829456	down
chr13	16722417	16722586	170	chr13_16722417_16722586	ORR1F	LTR/ERVL-MaLR	LTR	ERVL-MaLR	0	2.32192809488736	-2.32192809488736	0.0463656270839443	down
chr2	131439851	131440490	640	chr2_131439851_131440490	MT-int	LTR/ERVL-MaLR	LTR	ERVL-MaLR	0	2.32192809488736	-2.32192809488736	0.048829743930823	down
chr2	82709351	82709421	71	chr2_82709351_82709421	RLTR20A4	LTR/ERVK	LTR	ERVK	0	2.32192809488736	-2.32192809488736	0.0451709794082261	down
chr3	57944301	57944472	172	chr3_57944301_57944472	MT2B1	LTR/ERVL	LTR	ERVL	0	2.32192809488736	-2.32192809488736	0.0487822745673864	down
chr4	80233399	80235738	2340	chr4_80233399_80235738	L1MdF_V	LINE/L1	LINE	L1	0	2.32192809488736	-2.32192809488736	0.0463964358384031	down
chr5	18577301	18577897	597	chr5_18577301_18577897	Lx8b	LINE/L1	LINE	L1	0	2.32192809488736	-2.32192809488736	0.048829743930823	down
chr7	13553203	13553536	334	chr7_13553203_13553536	ORR1A4	LTR/ERVL-MaLR	LTR	ERVL-MaLR	0	2.32192809488736	-2.32192809488736	0.0487822745673864	down
chr7	145313434	145313631	198	chr7_145313434_145313631	RLTR17B_Mm	LTR/ERVK	LTR	ERVK	0	2.32192809488736	-2.32192809488736	0.0487822745673864	down
chr10	115572859	115573723	865	chr10_115572859_115573723	B1_Mur4	SINE/Alu	SINE	Alu	2.58496250072116	4.83289001416474	-2.24792751344359	0.0256772952529237	down
chr15	59180611	59181634	1024	chr15_59180611_59181634	B1_Mur3	SINE/Alu	SINE	Alu	3.58496250072116	5.53915881110803	-1.95419631038687	0.0228456889935277	down
chr16	46975601	46982037	6437	chr16_46975601_46982037	MERVL-int	LTR/ERVL	LTR	ERVL	5.49185309632967	4.4262647547021	1.06558834162758	0.0484373137796319	up
chr3	66669951	66677351	7401	chr3_66669951_66677351	L1MdGf_I	LINE/L1	LINE	L1	5.64385618977472	4.55458885167764	1.08926733809709	0.0381387269474917	up
chr6	84764328	84771240	6913	chr6_84764328_84771240	L1MdTf_III	LINE/L1	LINE	L1	4.93073733756289	3.75488750216347	1.17584983539942	0.0470281674592093	up
chrX	22874951	22881840	6890	chrX_22874951_22881840	L1MdGf_I	LINE/L1	LINE	L1	5.2667865406949	4.08746284125034	1.17932369944456	0.0371436848881167	up
chr4	58224806	58231028	6223	chr4_58224806_58231028	L1MdTf_II	LINE/L1	LINE	L1	4.97727992349992	3.75488750216347	1.22239242133645	0.0429947463557898	up
chr15	28252759	28259399	6641	chr15_28252759_28259399	L1MdTf_II	LINE/L1	LINE	L1	5.32192809488736	4.08746284125034	1.23446525363702	0.0338268622575455	up
chr12	32902329	32906432	4104	chr12_32902329_32906432	IAPEz-int	LTR/ERVK	LTR	ERVK	4.88264304936184	3.64385618977472	1.23878685958712	0.0425223784256943	up
chr1	125355553	125362777	7225	chr1_125355553_125362777	L1MdA_II	LINE/L1	LINE	L1	5.28540221886225	4.04439411935845	1.2410080995038	0.0476760932834226	up
chr2	17317824	17324496	6673	chr2_17317824_17324496	L1MdTf_I	LINE/L1	LINE	L1	4.90689059560852	3.64385618977472	1.26303440583379	0.0472358002226985	up
chr9	40064126	40070688	6563	chr9_40064126_40070688	L1MdA_I	LINE/L1	LINE	L1	5.39231742277876	4.12928301694497	1.26303440583379	0.0196439140244211	up
chr6	58173540	58180244	6705	chr6_58173540_58180244	L1MdGf_I	LINE/L1	LINE	L1	4.95419631038687	3.64385618977472	1.31034012061215	0.0336148902663503	up
chr13	87370775	87375194	4420	chr13_87370775_87375194	IAPEz-int	LTR/ERVK	LTR	ERVK	4.70043971814109	3.32192809488736	1.37851162325373	0.0426349510733554	up
chr10	86676189	86684587	8399	chr10_86676189_86684587	MMERGLN-int	LTR/ERV1	LTR	ERV1	4.49185309632967	3.08746284125034	1.40439025507934	0.0396438714387085	up
chr13	72985182	72991391	6210	chr13_72985182_72991391	L1MdGf_II	LINE/L1	LINE	L1	4.16992500144231	2.58496250072116	1.58496250072116	0.0413249980153225	up
chr13	77945237	77951649	6413	chr13_77945237_77951649	L1MdA_IV	LINE/L1	LINE	L1	4.08746284125034	2.4594316186373	1.62803122261304	0.0453478745126444	up
chr7	103294313	103302013	7701	chr7_103294313_103302013	RLTR6-int	LTR/ERV1	LTR	ERV1	3.8073549220576	2	1.8073549220576	0.0471727723012591	up
chr2	165430780	165431343	564	chr2_165430780_165431343	ID_B1	SINE/B4	SINE	B4	4.90689059560852	3	1.90689059560852	0.00562760397189316	up
chr17	17214834	17221028	6195	chr17_17214834_17221028	L1MdA_III	LINE/L1	LINE	L1	4.4594316186373	2.4594316186373	2	0.00970855318718979	up
chr3	79997357	79999964	2608	chr3_79997357_79999964	L1_Mur3	LINE/L1	LINE	L1	3.75488750216347	1.58496250072116	2.16992500144231	0.0362561828070647	up
chr7	65219506	65224462	4957	chr7_65219506_65224462	L1_Rod	LINE/L1	LINE	L1	3.75488750216347	1.58496250072116	2.16992500144231	0.0298584943538773	up
chr1	65591832	65591934	103	chr1_65591832_65591934	RLTR20C1_MM	LTR/ERVK	LTR	ERVK	2.32192809488736	0	2.32192809488736	0.0486936410750532	up
chr1	67467463	67467607	145	chr1_67467463_67467607	B3A	SINE/B2	SINE	B2	2.32192809488736	0	2.32192809488736	0.0462682586804073	up
chr10	119485107	119485184	78	chr10_119485107_119485184	RLTR20C1_MM	LTR/ERVK	LTR	ERVK	2.32192809488736	0	2.32192809488736	0.0486936410750532	up
chr11	42180210	42180427	218	chr11_42180210_42180427	RMER17D2	LTR/ERVK	LTR	ERVK	2.32192809488736	0	2.32192809488736	0.0486936410750532	up
chr11	57625672	57625813	142	chr11_57625672_57625813	RSINE1	SINE/B4	SINE	B4	2.32192809488736	0	2.32192809488736	0.0486936410750532	up
chr14	109530865	109533131	2267	chr14_109530865_109533131	L1MdV_II	LINE/L1	LINE	L1	2.32192809488736	0	2.32192809488736	0.0486936410750532	up
chr14	87230310	87231866	1557	chr14_87230310_87231866	L1MdF_I	LINE/L1	LINE	L1	2.32192809488736	0	2.32192809488736	0.0462682586804073	up
chr15	63672754	63673443	690	chr15_63672754_63673443	B4	SINE/B4	SINE	B4	2.32192809488736	0	2.32192809488736	0.0486936410750532	up
chr16	92545444	92545854	411	chr16_92545444_92545854	MLT1C	LTR/ERVL-MaLR	LTR	ERVL-MaLR	2.32192809488736	0	2.32192809488736	0.0486936410750532	up
chr17	4377546	4377605	60	chr17_4377546_4377605	RLTR20A4	LTR/ERVK	LTR	ERVK	2.32192809488736	0	2.32192809488736	0.0486936410750532	up
chr3	47622568	47626442	3875	chr3_47622568_47626442	L1MdF_I	LINE/L1	LINE	L1	2.32192809488736	0	2.32192809488736	0.0450488594344416	up
chr4	138230944	138231756	813	chr4_138230944_138231756	MER2	DNA/TcMar-Tigger	DNA	TcMar-Tigger	2.32192809488736	0	2.32192809488736	0.0450488594344416	up
chr4	71883402	71884516	1115	chr4_71883402_71884516	L1MdN_I	LINE/L1	LINE	L1	2.32192809488736	0	2.32192809488736	0.0446706581027248	up
chr5	69219089	69219287	199	chr5_69219089_69219287	ID_B1	SINE/B4	SINE	B4	2.32192809488736	0	2.32192809488736	0.0486936410750532	up
chr6	98899960	98900079	120	chr6_98899960_98900079	L1M5	LINE/L1	LINE	L1	2.32192809488736	0	2.32192809488736	0.0486936410750532	up
chr7	135153275	135153500	226	chr7_135153275_135153500	B4	SINE/B4	SINE	B4	2.32192809488736	0	2.32192809488736	0.0486936410750532	up
chr7	138785140	138785547	408	chr7_138785140_138785547	L1_Mur3	LINE/L1	LINE	L1	2.32192809488736	0	2.32192809488736	0.0486936410750532	up
chr8	43943344	43945155	1812	chr8_43943344_43945155	L1M2	LINE/L1	LINE	L1	2.32192809488736	0	2.32192809488736	0.0486936410750532	up
chr9	57290592	57290676	85	chr9_57290592_57290676	PB1D7	SINE/Alu	SINE	Alu	2.32192809488736	0	2.32192809488736	0.0462682586804073	up
chr9	57290682	57290805	124	chr9_57290682_57290805	RSINE1	SINE/B4	SINE	B4	2.32192809488736	0	2.32192809488736	0.0462682586804073	up
chrX	49913101	49913265	165	chrX_49913101_49913265	MIRb	SINE/MIR	SINE	MIR	2.32192809488736	0	2.32192809488736	0.0462682586804073	up
chrX	5464146	5466073	1928	chrX_5464146_5466073	L1M2	LINE/L1	LINE	L1	2.32192809488736	0	2.32192809488736	0.0450488594344416	up
chr10	24072824	24072992	169	chr10_24072824_24072992	B3A	SINE/B2	SINE	B2	2.4594316186373	0	2.4594316186373	0.0443934543262947	up
chr13	65025512	65031493	5982	chr13_65025512_65031493	L1MdA_V	LINE/L1	LINE	L1	3.4594316186373	1	2.4594316186373	0.0347227759667425	up
chr15	93509459	93509633	175	chr15_93509459_93509633	ID_B1	SINE/B4	SINE	B4	2.4594316186373	0	2.4594316186373	0.0443934543262947	up
chr16	16764521	16765682	1162	chr16_16764521_16765682	L1MdV_II	LINE/L1	LINE	L1	2.4594316186373	0	2.4594316186373	0.0319891635246369	up
chr16	25657717	25658014	298	chr16_25657717_25658014	B4A	SINE/B4	SINE	B4	2.4594316186373	0	2.4594316186373	0.0308178745302281	up
chr17	30169929	30176132	6204	chr17_30169929_30176132	L1MdA_V	LINE/L1	LINE	L1	3.4594316186373	1	2.4594316186373	0.035471311215354	up
chr17	88432675	88432772	98	chr17_88432675_88432772	RSINE1	SINE/B4	SINE	B4	2.4594316186373	0	2.4594316186373	0.0443934543262947	up
chr19	31142356	31142520	165	chr19_31142356_31142520	RLTR31D_MM	LTR/ERVK	LTR	ERVK	2.4594316186373	0	2.4594316186373	0.0319891635246369	up
chr19	31142521	31142865	345	chr19_31142521_31142865	L1MA9	LINE/L1	LINE	L1	2.4594316186373	0	2.4594316186373	0.0319891635246369	up
chr19	46111107	46111312	206	chr19_46111107_46111312	ID_B1	SINE/B4	SINE	B4	2.4594316186373	0	2.4594316186373	0.0443934543262947	up
chr2	24745369	24746884	1516	chr2_24745369_24746884	L1MDa	LINE/L1	LINE	L1	2.4594316186373	0	2.4594316186373	0.0308178745302281	up
chr2	33324991	33325865	875	chr2_33324991_33325865	L1MA4	LINE/L1	LINE	L1	2.4594316186373	0	2.4594316186373	0.0443934543262947	up
chr3	124390742	124390940	199	chr3_124390742_124390940	RLTR17B_Mm	LTR/ERVK	LTR	ERVK	2.4594316186373	0	2.4594316186373	0.0443934543262947	up
chr3	136387654	136388658	1005	chr3_136387654_136388658	Lx8b	LINE/L1	LINE	L1	2.4594316186373	0	2.4594316186373	0.0319891635246369	up
chr3	140811013	140812359	1347	chr3_140811013_140812359	Lx3A	LINE/L1	LINE	L1	2.4594316186373	0	2.4594316186373	0.0443934543262947	up
chr6	105707334	105707475	142	chr6_105707334_105707475	B3A	SINE/B2	SINE	B2	2.4594316186373	0	2.4594316186373	0.0443934543262947	up
chr6	122189436	122189674	239	chr6_122189436_122189674	PB1D9	SINE/Alu	SINE	Alu	2.4594316186373	0	2.4594316186373	0.0444229117143839	up
chr7	140790063	140790958	896	chr7_140790063_140790958	L1MdGf_I	LINE/L1	LINE	L1	2.4594316186373	0	2.4594316186373	0.0308112429913258	up
chr9	30966133	30966488	356	chr9_30966133_30966488	B1_Mus2	SINE/Alu	SINE	Alu	2.4594316186373	0	2.4594316186373	0.0319891635246369	up
chr1	52869703	52869834	132	chr1_52869703_52869834	B1F2	SINE/Alu	SINE	Alu	2.58496250072116	0	2.58496250072116	0.0472428135339617	up
chr1	66171945	66173173	1229	chr1_66171945_66173173	Lx9	LINE/L1	LINE	L1	2.58496250072116	0	2.58496250072116	0.0222835688067176	up
chr10	72006406	72007678	1273	chr10_72006406_72007678	ORR1C2-int	LTR/ERVL-MaLR	LTR	ERVL-MaLR	2.58496250072116	0	2.58496250072116	0.0472428135339617	up
chr10	9146995	9149185	2191	chr10_9146995_9149185	MLT1G3-int	LTR/ERVL-MaLR	LTR	ERVL-MaLR	2.58496250072116	0	2.58496250072116	0.0222835688067176	up
chr11	4004826	4005359	534	chr11_4004826_4005359	ID_B1	SINE/B4	SINE	B4	2.58496250072116	0	2.58496250072116	0.0472428135339617	up
chr14	70265105	70265182	78	chr14_70265105_70265182	ID4_	SINE/ID	SINE	ID	2.58496250072116	0	2.58496250072116	0.0222835688067176	up
chr16	25657468	25657586	119	chr16_25657468_25657586	B1_Mus1	SINE/Alu	SINE	Alu	2.58496250072116	0	2.58496250072116	0.0212604357036372	up
chr2	132194221	132194424	204	chr2_132194221_132194424	L1M2	LINE/L1	LINE	L1	2.58496250072116	0	2.58496250072116	0.0472428135339617	up
chr2	160470327	160470537	211	chr2_160470327_160470537	RLTR17B_Mm	LTR/ERVK	LTR	ERVK	2.58496250072116	0	2.58496250072116	0.0472428135339617	up
chr4	137779053	137779186	134	chr4_137779053_137779186	B1_Mm	SINE/Alu	SINE	Alu	2.58496250072116	0	2.58496250072116	0.0222835688067176	up
chr5	128999917	128999985	69	chr5_128999917_128999985	ID4_	SINE/ID	SINE	ID	2.58496250072116	0	2.58496250072116	0.0212604357036372	up
chr15	82845954	82846908	955	chr15_82845954_82846908	L1MdA_III	LINE/L1	LINE	L1	3.24792751344359	0.584962500721156	2.66296501272243	0.0417368438266258	up
chr5	85142920	85144694	1775	chr5_85142920_85144694	L1MdGf_II	LINE/L1	LINE	L1	3.24792751344359	0.584962500721156	2.66296501272243	0.0461930226054876	up
chr1	53457841	53464008	6168	chr1_53457841_53464008	L1MdA_VI	LINE/L1	LINE	L1	2.70043971814109	0	2.70043971814109	0.0143518209382113	up
chr10	89932161	89932566	406	chr10_89932161_89932566	Lx6	LINE/L1	LINE	L1	2.70043971814109	0	2.70043971814109	0.0157495655052548	up
chr11	65978271	65978495	225	chr11_65978271_65978495	B3	SINE/B2	SINE	B2	2.70043971814109	0	2.70043971814109	0.0157495655052548	up
chr12	27354870	27355006	137	chr12_27354870_27355006	B1_Mur1	SINE/Alu	SINE	Alu	2.70043971814109	0	2.70043971814109	0.0492450435148171	up
chr12	39124817	39125047	231	chr12_39124817_39125047	L1_Mur3	LINE/L1	LINE	L1	2.70043971814109	0	2.70043971814109	0.0492450435148171	up
chr13	48064779	48065029	251	chr13_48064779_48065029	Tigger5b_Glire	DNA/TcMar-Tigger	DNA	TcMar-Tigger	2.70043971814109	0	2.70043971814109	0.0157495655052548	up
chr16	3974118	3975001	884	chr16_3974118_3975001	L1ME3	LINE/L1	LINE	L1	2.70043971814109	0	2.70043971814109	0.0492450435148171	up
chr2	90078041	90078105	65	chr2_90078041_90078105	RLTR20A4	LTR/ERVK	LTR	ERVK	2.70043971814109	0	2.70043971814109	0.0148649920351665	up
chr4	35360987	35361539	553	chr4_35360987_35361539	URR1A	DNA/hAT-Charlie	DNA	hAT-Charlie	2.70043971814109	0	2.70043971814109	0.0157495655052548	up
chr5	24270175	24270245	71	chr5_24270175_24270245	RLTR20A4	LTR/ERVK	LTR	ERVK	2.70043971814109	0	2.70043971814109	0.0148649920351665	up
chr3	62511506	62517532	6027	chr3_62511506_62517532	L1MdF_II	LINE/L1	LINE	L1	3.32192809488736	0.584962500721156	2.73696559416621	0.0331632092741882	up
chr13	3498746	3498954	209	chr13_3498746_3498954	ID_B1	SINE/B4	SINE	B4	2.8073549220576	0	2.8073549220576	0.0168697823155884	up
chr18	14284058	14284287	230	chr18_14284058_14284287	B4A	SINE/B4	SINE	B4	2.8073549220576	0	2.8073549220576	0.0168697823155884	up
chr4	148647338	148647515	178	chr4_148647338_148647515	B2_Mm2	SINE/B2	SINE	B2	2.8073549220576	0	2.8073549220576	0.0168697823155884	up
chr4	46731192	46731287	96	chr4_46731192_46731287	MIRb	SINE/MIR	SINE	MIR	2.8073549220576	0	2.8073549220576	0.0101126406432312	up
chr5	106256775	106256974	200	chr5_106256775_106256974	Lx8	LINE/L1	LINE	L1	2.8073549220576	0	2.8073549220576	0.010571796408154	up
chr6	100655829	100655947	119	chr6_100655829_100655947	RSINE1	SINE/B4	SINE	B4	2.8073549220576	0	2.8073549220576	0.0168697823155884	up
chr8	128948887	128955229	6343	chr8_128948887_128955229	L1MdF_III	LINE/L1	LINE	L1	2.8073549220576	0	2.8073549220576	0.0098619064373673	up
chr1	55033197	55034575	1379	chr1_55033197_55034575	RLTR19-int	LTR/ERVK	LTR	ERVK	2.90689059560852	0	2.90689059560852	0.0192799288816789	up
chr16	48032401	48033752	1352	chr16_48032401_48033752	Lx7	LINE/L1	LINE	L1	2.90689059560852	0	2.90689059560852	0.0438424958286332	up
chr9	9424292	9424412	121	chr9_9424292_9424412	RLTR20A4	LTR/ERVK	LTR	ERVK	2.90689059560852	0	2.90689059560852	0.0438532473675063	up
chr10	61612060	61612148	89	chr10_61612060_61612148	B3A	SINE/B2	SINE	B2	3	0	3	0.0212563122102042	up
chr13	79541066	79542232	1167	chr13_79541066_79542232	ORR1E-int	LTR/ERVL-MaLR	LTR	ERVL-MaLR	3	0	3	0.0212563122102042	up
chr17	62139072	62139199	128	chr17_62139072_62139199	RSINE1	SINE/B4	SINE	B4	3	0	3	0.00565194863982424	up
chr3	123333662	123334571	910	chr3_123333662_123334571	L1_Mur3	LINE/L1	LINE	L1	3	0	3	0.0212563122102042	up
chr4	45051761	45052104	344	chr4_45051761_45052104	RSINE1	SINE/B4	SINE	B4	3	0	3	0.00565194863982424	up
chr4	53423569	53423805	237	chr4_53423569_53423805	B3A	SINE/B2	SINE	B2	3	0	3	0.00532279841326373	up
chr7	6940148	6940542	395	chr7_6940148_6940542	B3	SINE/B2	SINE	B2	3	0	3	0.0361351254709069	up
chr9	122068237	122068294	58	chr9_122068237_122068294	RLTR20A4	LTR/ERVK	LTR	ERVK	3	0	3	0.0498880404845699	up
chr15	95375155	95375794	640	chr15_95375155_95375794	B1_Mur4	SINE/Alu	SINE	Alu	5.02236781302845	2	3.02236781302845	0.0161353604257348	up
chr14	25467468	25467601	134	chr14_25467468_25467601	B4	SINE/B4	SINE	B4	3.64385618977472	0.584962500721156	3.05889368905357	0.0122017143900839	up
chr7	93056902	93057084	183	chr7_93056902_93057084	L1MC1	LINE/L1	LINE	L1	3.08746284125034	0	3.08746284125034	0.0288888783526954	up
chr1	37603962	37605849	1888	chr1_37603962_37605849	MTA_Mm-int	LTR/ERVL-MaLR	LTR	ERVL-MaLR	3.16992500144231	0	3.16992500144231	0.0228364277802407	up
chr2	153157102	153157376	275	chr2_153157102_153157376	B1_Mus1	SINE/Alu	SINE	Alu	3.16992500144231	0	3.16992500144231	0.0487990218306028	up
chr2	53018539	53018650	112	chr2_53018539_53018650	B1F	SINE/Alu	SINE	Alu	3.16992500144231	0	3.16992500144231	0.0244098733473069	up
chr8	4459449	4464129	4681	chr8_4459449_4464129	Lx5c	LINE/L1	LINE	L1	3.16992500144231	0	3.16992500144231	0.023344341015029	up
chr3	139273507	139273851	345	chr3_139273507_139273851	B1_Mur3	SINE/Alu	SINE	Alu	3.8073549220576	0.584962500721156	3.22239242133645	0.00896586101029962	up
chr17	14212369	14212444	76	chr17_14212369_14212444	ID4_	SINE/ID	SINE	ID	3.24792751344359	0	3.24792751344359	0.00976846412582281	up
chr9	113569675	113570195	521	chr9_113569675_113570195	B4	SINE/B4	SINE	B4	3.24792751344359	0	3.24792751344359	0.0356292608381307	up
chr13	53551938	53552190	253	chr13_53551938_53552190	B4A	SINE/B4	SINE	B4	3.32192809488736	0	3.32192809488736	0.00161430420504023	up
chr14	74223364	74223677	314	chr14_74223364_74223677	B1_Mus2	SINE/Alu	SINE	Alu	3.90689059560852	0.584962500721156	3.32192809488736	0.00649457128647462	up
chr2	101730237	101730684	448	chr2_101730237_101730684	B1_Mus1	SINE/Alu	SINE	Alu	3.32192809488736	0	3.32192809488736	0.0170790789785544	up
chr16	7550812	7551019	208	chr16_7550812_7551019	B3A	SINE/B2	SINE	B2	3.39231742277876	0	3.39231742277876	0.0274087444396594	up
chr4	127797485	127797962	478	chr4_127797485_127797962	B4A	SINE/B4	SINE	B4	3.39231742277876	0	3.39231742277876	0.0120518646113684	up
chrX	43596476	43597496	1021	chrX_43596476_43597496	Lx5b	LINE/L1	LINE	L1	3.39231742277876	0	3.39231742277876	0.029210763653826	up
chr2	162702140	162703043	904	chr2_162702140_162703043	L1MC4a	LINE/L1	LINE	L1	3.52356195605701	0	3.52356195605701	0.0287567415804775	up
chr8	94021506	94021807	302	chr8_94021506_94021807	hAT-16_Crp	DNA/hAT-Charlie	DNA	hAT-Charlie	3.52356195605701	0	3.52356195605701	0.0139506512088076	up
chr12	9172081	9173444	1364	chr12_9172081_9173444	L1ME2	LINE/L1	LINE	L1	4.16992500144231	0.584962500721156	3.58496250072116	0.00172189260954755	up
chr11	34148852	34149178	327	chr11_34148852_34149178	B1_Mus2	SINE/Alu	SINE	Alu	4.20945336562895	0.584962500721156	3.62449086490779	0.0361140742340598	up
chr14	87333626	87335497	1872	chr14_87333626_87335497	L1MB7	LINE/L1	LINE	L1	3.64385618977472	0	3.64385618977472	0.046220245189842	up
chr13	51593297	51594187	891	chr13_51593297_51594187	Lx8	LINE/L1	LINE	L1	3.70043971814109	0	3.70043971814109	0.00700409914755937	up
chr2	170897041	170900763	3723	chr2_170897041_170900763	L1_Mur2	LINE/L1	LINE	L1	3.75488750216347	0	3.75488750216347	0.0167661935731948	up
chr1	154189478	154189576	99	chr1_154189478_154189576	L3	LINE/CR1	LINE	CR1	3.8073549220576	0	3.8073549220576	0.0306808608136876	up
chr10	110188167	110189727	1561	chr10_110188167_110189727	L1MA9	LINE/L1	LINE	L1	3.85798099512757	0	3.85798099512757	0.00362119901880373	up
chr9	122068337	122068394	58	chr9_122068337_122068394	RLTR20A4	LTR/ERVK	LTR	ERVK	3.90689059560852	0	3.90689059560852	0.00278891608971752	up
chr11	61260656	61261525	870	chr11_61260656_61261525	MYSERV16_I-int	LTR/ERVK	LTR	ERVK	4.28540221886225	0	4.28540221886225	0.0206445690934545	up
chr9	95826303	95827068	766	chr9_95826303_95827068	L1MC3	LINE/L1	LINE	L1	4.88264304936184	0.584962500721156	4.29768054864069	0.0000518803455321391	up
chr7	35278404	35278947	544	chr7_35278404_35278947	ID_B1	SINE/B4	SINE	B4	4.55458885167764	0	4.55458885167764	0.000404785524455302	up
chr4	43079313	43080406	1094	chr4_43079313_43080406	ID_B1	SINE/B4	SINE	B4	6.4594316186373	0	6.4594316186373	0.00776325191999763	up
