# Supplementary material for: Differential sensitivity to LINE 1-induced damage contributes to the expansion of Tet2-deficient HSCs upon chronic inflammatory stress
Source: Research Square preprint supplement (doi:10.21203/rs.3.rs-7934135/v1), 2025-10-29
Supplement: Supplementary file 2 [file eeea678fbe6ee0d0075ee9f9.xlsx]

## Sheet: WT-LPS vs WT p<0.05
Table S2. Differentially expressed genes (DEG) in WT-LPS vs WT pvalue<0.05 ; 0.9<FC<1.1
ENSEMBL	baseMean	log2FoldChange	lfcSE	pvalue	padj	symbol	biotype	status
ENSMUSG00000000167	36.47822581	-0.189823532	0.360711012	0.007883702	0.251632143	Pih1d2	protein-coding	Downregulated
ENSMUSG00000000561	568.1694025	-1.815359558	0.972558339	0.001325455	0.09169241	Wdr77	protein-coding	Downregulated
ENSMUSG00000000673	113.9711561	2.483444256	2.083869372	0.00119381	0.085110994	Haao	protein-coding	Upregulated
ENSMUSG00000001632	1063.84751	0.157604248	0.313337956	0.0386765	0.51176761	Brpf1	protein-coding	Upregulated
ENSMUSG00000002103	306.4839942	-0.159404498	0.327690194	0.00285148	0.151772974	Acp2	protein-coding	Downregulated
ENSMUSG00000002871	249.9797635	-2.338195261	0.968248294	0.000504199	0.046354745	Tpra1	protein-coding	Downregulated
ENSMUSG00000004266	2373.05241	-1.332314038	0.658828713	0.001722329	0.110007287	Ptpn6	protein-coding	Downregulated
ENSMUSG00000004364	1845.382259	-0.192066164	0.348895244	0.027686331	0.448230169	Cul3	protein-coding	Downregulated
ENSMUSG00000004565	487.2820896	0.259866672	0.478320314	0.008803549	0.261782055	Pnpla6	protein-coding	Upregulated
ENSMUSG00000004951	516.1503378	3.523806662	1.193567449	0.000011756	0.002884922	Hspb1	protein-coding	Upregulated
ENSMUSG00000005237	122.8274726	-0.164605817	0.328768281	0.012614455	0.318614071	Dnah2	protein-coding	Downregulated
ENSMUSG00000005370	1563.040168	-0.201881024	0.357167342	0.025035306	0.4294688	Msh6	protein-coding	Downregulated
ENSMUSG00000005687	624.4680063	0.155888862	0.312185949	0.026152055	0.439079681	Bcas2	protein-coding	Upregulated
ENSMUSG00000006423	528.3039405	-0.233530466	0.418620185	0.015883045	0.34866425	Steep1	protein-coding	Downregulated
ENSMUSG00000008734	333.4141091	-0.176871386	0.338033201	0.014518671	0.336789824	Gprc5b	protein-coding	Downregulated
ENSMUSG00000014668	335.6886994	-0.282024235	0.500999486	0.01937272	0.384044414	Chfr	protein-coding	Downregulated
ENSMUSG00000015312	781.0771775	0.163584141	0.320572845	0.025928618	0.437074376	Gadd45b	protein-coding	Upregulated
ENSMUSG00000015355	181.765128	-0.227186568	0.419975156	0.005684165	0.214711965	Cd48	protein-coding	Downregulated
ENSMUSG00000015474	363.1069982	-0.163409645	0.321831129	0.033547289	0.484865441	Ppt2	protein-coding	Downregulated
ENSMUSG00000015659	58.67094316	3.030364973	2.214689038	0.000155187	0.020439922	Serac1	protein-coding	Upregulated
ENSMUSG00000018379	2862.499339	-0.296960746	0.478068946	0.03208876	0.480157417	Srsf1	protein-coding	Downregulated
ENSMUSG00000018433	697.1037369	-1.237613237	1.210148939	0.005004719	0.202209742	Nol11	protein-coding	Downregulated
ENSMUSG00000018548	1197.803388	-0.19387929	0.367509049	0.009110127	0.266145858	Trim37	protein-coding	Downregulated
ENSMUSG00000018921	813.5474713	-0.784884292	1.267187683	0.011768271	0.304488001	Pelp1	protein-coding	Downregulated
ENSMUSG00000019066	370.5646821	-0.280836702	0.492037885	0.019097378	0.382605087	Rab3d	protein-coding	Downregulated
ENSMUSG00000019124	91.52755302	-2.547884819	1.095648379	0.000248962	0.028175039	Scrn1	protein-coding	Downregulated
ENSMUSG00000019564	559.8057336	2.966153213	0.949685283	0.0000152671	0.003489426	Arid3a	protein-coding	Upregulated
ENSMUSG00000019823	637.4614286	0.178003788	0.329262399	0.038892982	0.512314348	Mical1	protein-coding	Upregulated
ENSMUSG00000019849	1055.917629	-0.569770532	1.312327714	0.012921263	0.32131289	Prep	protein-coding	Downregulated
ENSMUSG00000019868	214.587725	-0.182467806	0.348661218	0.013175404	0.324396599	Vta1	protein-coding	Downregulated
ENSMUSG00000020063	512.2494839	0.609774704	1.525272871	0.009345919	0.269329813	Sirt1	protein-coding	Upregulated
ENSMUSG00000020205	1144.391712	1.864071238	0.708001401	0.000217894	0.02539885	Phlda1	protein-coding	Upregulated
ENSMUSG00000020275	670.1603738	0.159966827	0.321261271	0.014125157	0.331702314	Rel	protein-coding	Upregulated
ENSMUSG00000020329	347.0596239	-0.194059688	0.351877279	0.02715614	0.446152986	Polrmt	protein-coding	Downregulated
ENSMUSG00000020491	56.44964089	3.568358723	1.493097744	0.000146861	0.019694617	2810021J22Rik	protein-coding	Upregulated
ENSMUSG00000020573	1664.27204	-0.317885849	0.515659028	0.026179417	0.439079681	Pik3cg	protein-coding	Downregulated
ENSMUSG00000020647	1166.08957	-0.154301444	0.31374002	0.014001018	0.330834085	Ncoa1	protein-coding	Downregulated
ENSMUSG00000020648	77.70418028	-0.174720997	0.343813419	0.003212455	0.16123345	Dus4l	protein-coding	Downregulated
ENSMUSG00000020654	141.2218473	0.13763452	0.298319966	0.040969505	0.520502491	Adcy3	protein-coding	Upregulated
ENSMUSG00000020658	121.2287049	0.156995468	0.318658687	0.0175201	0.367133037	Efr3b	protein-coding	Upregulated
ENSMUSG00000020740	542.7687163	0.145077889	0.300173261	0.033141738	0.483197831	Gga3	protein-coding	Upregulated
ENSMUSG00000020810	44.84341851	-0.154423172	0.323671053	0.000552806	0.049377667	Cygb	protein-coding	Downregulated
ENSMUSG00000020921	104.9410523	-2.775957723	0.879365976	0.0000416424	0.007584442	Tmem101	protein-coding	Downregulated
ENSMUSG00000021179	398.9309891	-0.235367273	0.410821398	0.022323659	0.411408275	Nrde2	protein-coding	Downregulated
ENSMUSG00000021453	724.6921858	2.641873959	1.073700817	0.0000717701	0.011539147	Gadd45g	protein-coding	Upregulated
ENSMUSG00000021629	814.3574341	-0.351583979	0.664554252	0.01840347	0.376158069	Slc30a5	protein-coding	Downregulated
ENSMUSG00000021638	93.06126363	3.534432781	2.879123958	0.000404927	0.039719796	Ocln	protein-coding	Upregulated
ENSMUSG00000021693	1354.808877	-0.170429447	0.32271932	0.034762321	0.492353584	Kif2a	protein-coding	Downregulated
ENSMUSG00000021720	181.2855746	-0.329809666	0.701625359	0.007930224	0.251632143	Rnf180	protein-coding	Downregulated
ENSMUSG00000022051	1438.131582	0.16031193	0.319311827	0.011576609	0.301211489	Bnip3l	protein-coding	Upregulated
ENSMUSG00000022096	154.3265662	-0.16156843	0.319315729	0.035177081	0.493950192	Hr	protein-coding	Downregulated
ENSMUSG00000022199	140.3872085	1.750173459	0.961346068	0.001363603	0.093383222	Slc22a17	protein-coding	Upregulated
ENSMUSG00000022261	165.060636	-0.19662643	0.356094449	0.027846512	0.448305753	Sdc2	protein-coding	Downregulated
ENSMUSG00000022386	91.9027659	-0.166015501	0.320771269	0.0420975	0.525768653	Trmu	protein-coding	Downregulated
ENSMUSG00000022421	100.9405509	4.016557092	1.22201557	0.0000230285	0.004836614	Nptxr	protein-coding	Upregulated
ENSMUSG00000022504	77.27843493	3.863818065	1.422049447	0.0000904422	0.013603091	Ciita	protein-coding	Upregulated
ENSMUSG00000022584	41.07650654	-0.19446789	0.387782014	0.0000000227286	0.00001751	Ly6c2	protein-coding	Downregulated
ENSMUSG00000022602	90.23775527	3.111698301	1.53130051	0.000688449	0.057305822	Arc	protein-coding	Upregulated
ENSMUSG00000022604	400.0655229	-0.190380408	0.347462879	0.030533045	0.468611443	Cep97	protein-coding	Downregulated
ENSMUSG00000022774	298.3373967	-0.203728357	0.369630603	0.018865858	0.381787978	Ncbp2	protein-coding	Downregulated
ENSMUSG00000022842	55.75778555	-0.229552044	0.460924498	0.00000284595	0.0009757	Ece2	protein-coding	Downregulated
ENSMUSG00000023009	356.6658502	0.199510778	0.370658643	0.006597121	0.232418779	Nckap5l	protein-coding	Upregulated
ENSMUSG00000023032	92.38063969	4.62146816	1.463604814	0.0000509703	0.008977605	Slc4a8	protein-coding	Upregulated
ENSMUSG00000023094	132.4353672	-2.383311182	0.89064348	0.000277643	0.030409696	Msrb2	protein-coding	Downregulated
ENSMUSG00000023391	39.66851505	3.276802811	2.298975202	0.000914977	0.07039889	Dlx2	protein-coding	Upregulated
ENSMUSG00000024109	813.4185295	-0.179181469	0.346244227	0.004073552	0.179522768	Nrxn1	protein-coding	Downregulated
ENSMUSG00000024112	70.06467454	2.012855763	1.619421569	0.002822732	0.151278943	Cacna1h	protein-coding	Upregulated
ENSMUSG00000024143	178.5853892	3.055022384	1.080665926	0.0000572005	0.009638972	Rhoq	protein-coding	Upregulated
ENSMUSG00000024420	750.7377296	-1.368840275	0.873458265	0.003616426	0.170667481	Zfp521	protein-coding	Downregulated
ENSMUSG00000024528	337.2756071	-0.155700581	0.315132088	0.033329657	0.483519356	Srfbp1	protein-coding	Downregulated
ENSMUSG00000024617	449.8273151	-0.251051636	0.445205252	0.019164167	0.382605087	Camk2a	protein-coding	Downregulated
ENSMUSG00000024824	149.1060133	-1.194492747	1.170000765	0.00435393	0.185903222	Rad9a	protein-coding	Downregulated
ENSMUSG00000025326	1285.35171	-0.178809905	0.335381426	0.03538155	0.494218145	Ube3a	protein-coding	Downregulated
ENSMUSG00000025340	740.2876922	0.168311979	0.330287919	0.010025198	0.279055448	Rabgef1	protein-coding	Upregulated
ENSMUSG00000025484	181.3906783	-0.237210749	0.425737471	0.013184137	0.324396599	Bet1l	protein-coding	Downregulated
ENSMUSG00000025931	127.3819117	0.150600227	0.313236829	0.010943481	0.294602051	Paqr8	protein-coding	Upregulated
ENSMUSG00000025959	311.7818259	0.232738253	0.411514679	0.017551275	0.367133037	Klf7	protein-coding	Upregulated
ENSMUSG00000026082	484.3135707	0.138731775	0.299424999	0.016941147	0.360683977	Rev1	protein-coding	Upregulated
ENSMUSG00000026176	1423.90512	-1.421489327	0.780562559	0.002830747	0.151360569	Ctdsp1	protein-coding	Downregulated
ENSMUSG00000026211	583.5519971	-0.387162631	1.050434004	0.007741205	0.251002375	Obsl1	protein-coding	Downregulated
ENSMUSG00000026500	100.1726975	-0.230760557	0.421575376	0.008729158	0.261151101	Cox20	protein-coding	Downregulated
ENSMUSG00000026578	419.9518579	-0.249292627	0.443331112	0.017550029	0.367133037	Ccdc181	protein-coding	Downregulated
ENSMUSG00000026600	431.6772895	-2.284488567	1.083708371	0.00069958	0.057834416	Soat1	protein-coding	Downregulated
ENSMUSG00000026628	3968.099154	0.207330829	0.360978951	0.034833849	0.492767914	Atf3	protein-coding	Upregulated
ENSMUSG00000026798	91.04311414	-0.152975518	0.30780923	0.043527809	0.532964186	Coq4	protein-coding	Downregulated
ENSMUSG00000026854	1461.525112	-3.948113759	1.043459804	0.00000255537	0.000889154	Usp20	protein-coding	Downregulated
ENSMUSG00000026893	73.47135532	-1.867939092	1.402894024	0.002391288	0.136303426	Gca	protein-coding	Downregulated
ENSMUSG00000026979	1812.578677	-0.16416644	0.321145389	0.031339091	0.474026027	Psd4	protein-coding	Downregulated
ENSMUSG00000026991	514.5479029	-2.054206837	1.075886123	0.001738179	0.110145422	Pkp4	protein-coding	Downregulated
ENSMUSG00000027030	94.58598958	-0.174186456	0.337188882	0.020188403	0.393823209	Stk39	protein-coding	Downregulated
ENSMUSG00000027075	211.1203115	0.171760754	0.329302029	0.026837614	0.443510988	Slc43a1	protein-coding	Upregulated
ENSMUSG00000027210	125.1333035	4.827372915	1.985767283	0.000049619	0.008862429	Meis2	protein-coding	Upregulated
ENSMUSG00000027304	1395.862769	-0.191189918	0.341561293	0.043250531	0.53206631	Rtf1	protein-coding	Downregulated
ENSMUSG00000027309	271.5020718	-0.17088771	0.335815265	0.006056816	0.222570477	Dnaaf9	protein-coding	Downregulated
ENSMUSG00000027397	981.658125	0.162618308	0.315033778	0.045240823	0.537289073	Slc20a1	protein-coding	Upregulated
ENSMUSG00000027465	432.1493712	-0.16398029	0.322519934	0.027807803	0.448305753	Tbc1d20	protein-coding	Downregulated
ENSMUSG00000027490	358.9422454	-0.157364057	0.31181165	0.048276424	0.552241548	E2f1	protein-coding	Downregulated
ENSMUSG00000027498	519.7784652	-0.193846427	0.360797055	0.003881808	0.176063421	Cstf1	protein-coding	Downregulated
ENSMUSG00000027774	437.5853742	-0.173133174	0.328941043	0.032393129	0.480700841	Gfm1	protein-coding	Downregulated
ENSMUSG00000027860	129.2103944	2.825587315	2.193343855	0.000311654	0.032897023	Vangl1	protein-coding	Upregulated
ENSMUSG00000027939	60.29826297	0.149387065	0.316004493	0.005669347	0.214711965	Nup210l	protein-coding	Upregulated
ENSMUSG00000027966	38.37722486	-0.168387418	0.335239857	0.007816835	0.251632143	Col11a1	protein-coding	Downregulated
ENSMUSG00000028017	77.40316826	0.16779582	0.333156253	0.009791663	0.276708964	Egf	protein-coding	Upregulated
ENSMUSG00000028068	4671.729574	-0.190025335	0.370091085	0.0000160082	0.00362329	Iqgap3	protein-coding	Downregulated
ENSMUSG00000028152	254.8508642	-0.176632341	0.338427647	0.021360277	0.40617629	Tspan5	protein-coding	Downregulated
ENSMUSG00000028191	692.2615297	0.279442329	0.501978316	0.012821498	0.320798251	Bcl10	protein-coding	Upregulated
ENSMUSG00000028195	390.3214411	0.195127643	0.377402888	0.000943489	0.071414181	Ccn1	protein-coding	Upregulated
ENSMUSG00000028456	219.606616	-1.596921232	0.921576901	0.002770684	0.14952072	Unc13b	protein-coding	Downregulated
ENSMUSG00000028469	191.4854651	0.184891702	0.34715969	0.018554873	0.378120411	Npr2	protein-coding	Upregulated
ENSMUSG00000028479	590.9990338	-0.289905692	0.522830917	0.01667279	0.356926304	Gne	protein-coding	Downregulated
ENSMUSG00000028614	489.450914	-0.329078654	0.659029321	0.007813766	0.251632143	Ndc1	protein-coding	Downregulated
ENSMUSG00000028657	927.5879393	-0.181568438	0.333329523	0.036673113	0.50257441	Ppt1	protein-coding	Downregulated
ENSMUSG00000028772	431.840825	-1.13081046	0.924312076	0.005274685	0.208362419	Zcchc17	protein-coding	Downregulated
ENSMUSG00000028863	434.7044201	-1.027921156	1.09647748	0.00860369	0.260829417	Meaf6	protein-coding	Downregulated
ENSMUSG00000029020	827.1612753	-0.241279673	0.403404652	0.033952669	0.487100664	Mfn2	protein-coding	Downregulated
ENSMUSG00000029090	402.7403089	-0.21127708	0.36475934	0.038010545	0.507816526	Adgra3	protein-coding	Downregulated
ENSMUSG00000029191	1475.767564	-0.233723158	0.383657279	0.043363222	0.53206631	Rfc1	protein-coding	Downregulated
ENSMUSG00000029209	160.1904175	-0.186510076	0.337321787	0.042289905	0.526486982	Gnpda2	protein-coding	Downregulated
ENSMUSG00000029346	126.1132988	-0.195867046	0.366988967	0.012911183	0.32131289	Srrd	protein-coding	Downregulated
ENSMUSG00000029388	368.2661996	-0.173970556	0.329663068	0.035872433	0.497459783	Eif2b1	protein-coding	Downregulated
ENSMUSG00000029463	229.9134841	-0.180527449	0.342232446	0.022461032	0.412554616	Fam216a	protein-coding	Downregulated
ENSMUSG00000029594	393.1391704	-0.356652963	0.730086694	0.015393832	0.342439326	Rbm19	protein-coding	Downregulated
ENSMUSG00000029661	141.3473697	1.516845138	1.692972326	0.003652768	0.17067216	Col1a2	protein-coding	Upregulated
ENSMUSG00000029672	496.5864456	-0.182115667	0.349130842	0.013026427	0.322383325	Fam3c	protein-coding	Downregulated
ENSMUSG00000029782	489.7036942	-0.241878234	0.438872909	0.010030818	0.279055448	Tmem209	protein-coding	Downregulated
ENSMUSG00000029863	1172.643562	-0.205138214	0.365046201	0.035060764	0.493950192	Casp2	protein-coding	Downregulated
ENSMUSG00000029864	63.45666091	0.201529361	0.381535126	0.003782074	0.173224913	Gstk1	protein-coding	Upregulated
ENSMUSG00000029992	1176.380376	-0.174885037	0.327438324	0.047225491	0.548102627	Gfpt1	protein-coding	Downregulated
ENSMUSG00000030101	162.7041433	0.148546715	0.305006152	0.035627036	0.495896496	Sumf1	protein-coding	Upregulated
ENSMUSG00000030126	344.2986205	-0.826347356	1.684175195	0.009354217	0.269329813	Tmcc1	protein-coding	Downregulated
ENSMUSG00000030451	1901.061676	0.141008228	0.299090046	0.032738338	0.481812896	Herc2	protein-coding	Upregulated
ENSMUSG00000030718	626.7954898	-0.262594864	0.449289554	0.025849121	0.436049613	Ppme1	protein-coding	Downregulated
ENSMUSG00000030796	150.1387612	4.090478236	1.589784841	0.00000451815	0.001404422	Tead2	protein-coding	Upregulated
ENSMUSG00000030942	1088.10194	-0.241896933	0.39606521	0.03763228	0.506244281	Thumpd1	protein-coding	Downregulated
ENSMUSG00000030980	976.5411615	-0.256930952	0.465819871	0.013425823	0.327372833	Knop1	protein-coding	Downregulated
ENSMUSG00000031144	55.97555148	-0.237603803	0.471414336	0.00015669	0.020492568	Syp	protein-coding	Downregulated
ENSMUSG00000031479	816.0550915	-0.406050342	0.952433824	0.012648581	0.31913026	Vps36	protein-coding	Downregulated
ENSMUSG00000031523	193.5444278	2.301817076	1.731594101	0.001824847	0.113577209	Dlc1	protein-coding	Upregulated
ENSMUSG00000031561	146.0590211	-0.155512698	0.325295626	0.000316427	0.033156816	Tenm3	protein-coding	Downregulated
ENSMUSG00000031604	550.6811968	-0.162178285	0.331605365	0.000447631	0.042929409	Msmo1	protein-coding	Downregulated
ENSMUSG00000031617	131.1406037	-0.296880897	0.582488989	0.008517539	0.259907563	Tmem184c	protein-coding	Downregulated
ENSMUSG00000031641	93.83572001	-0.20129174	0.362689931	0.026759422	0.443069886	Cbr4	protein-coding	Downregulated
ENSMUSG00000031668	457.0973119	0.231415023	0.41732351	0.009845796	0.276708964	Eif2ak3	protein-coding	Upregulated
ENSMUSG00000031708	2067.816579	-0.317968827	0.687965797	0.002814581	0.151189698	Tecr	protein-coding	Downregulated
ENSMUSG00000031776	433.4499726	-0.267406571	0.478600255	0.018829218	0.381377554	Arl2bp	protein-coding	Downregulated
ENSMUSG00000031823	337.7297555	-0.260380092	0.451837582	0.022646798	0.41279499	Zdhhc7	protein-coding	Downregulated
ENSMUSG00000031907	129.5500233	-0.152834381	0.314790555	0.013832428	0.330405126	Zfp90	protein-coding	Downregulated
ENSMUSG00000031924	1010.307177	-0.261224837	0.449371622	0.015365742	0.342439326	Cyb5b	protein-coding	Downregulated
ENSMUSG00000031985	704.655058	-0.272940787	0.462418757	0.028113268	0.448305753	Gnpat	protein-coding	Downregulated
ENSMUSG00000031986	394.6151332	-0.177470577	0.335954102	0.030052487	0.463859293	Sprtn	protein-coding	Downregulated
ENSMUSG00000032000	527.6946655	0.176858428	0.329758703	0.03670048	0.50257441	Birc3	protein-coding	Upregulated
ENSMUSG00000032252	114.6997301	-0.15561469	0.31875384	0.015812685	0.347446868	Glce	protein-coding	Downregulated
ENSMUSG00000032312	2549.470149	-0.273818797	0.427076288	0.041557689	0.523694274	Csk	protein-coding	Downregulated
ENSMUSG00000032352	264.8807225	-0.262556436	0.447243485	0.028473843	0.450958363	Lrrc1	protein-coding	Downregulated
ENSMUSG00000032519	131.733367	0.18291989	0.355080906	0.001069175	0.07862993	Slc25a38	protein-coding	Upregulated
ENSMUSG00000032534	710.5394927	0.139240457	0.30409673	0.011572939	0.301211489	Cep63	protein-coding	Upregulated
ENSMUSG00000032786	504.6020755	-0.217841451	0.400182105	0.01309511	0.323054295	Alas1	protein-coding	Downregulated
ENSMUSG00000032834	529.8830095	-0.188536863	0.355405911	0.006780701	0.234741084	Pwp2	protein-coding	Downregulated
ENSMUSG00000032860	186.5350296	0.197453285	0.371826011	0.004673392	0.194565452	P2ry2	protein-coding	Upregulated
ENSMUSG00000032869	399.1613735	-0.239473597	0.400136131	0.038050515	0.507836212	Psmf1	protein-coding	Downregulated
ENSMUSG00000032946	815.2510062	0.162473419	0.313001726	0.039311741	0.513043708	Rasgrp2	protein-coding	Upregulated
ENSMUSG00000032965	185.7719476	-0.197446366	0.356536523	0.029513716	0.458702175	Ift57	protein-coding	Downregulated
ENSMUSG00000033128	566.8567828	-0.896268199	1.305501655	0.007914426	0.251632143	Gga1	protein-coding	Downregulated
ENSMUSG00000033187	40.23104472	5.53801796	2.511592725	0.0001257	0.017547575	BC016579	protein-coding	Upregulated
ENSMUSG00000033282	261.4656801	-0.974912372	1.547101217	0.009863387	0.276708964	Rpgrip1l	protein-coding	Downregulated
ENSMUSG00000033285	1044.375881	-1.622594958	0.765770424	0.001352707	0.093025516	Wdr3	protein-coding	Downregulated
ENSMUSG00000033327	58.71002439	-0.237296312	0.450411884	0.002452193	0.138751268	Tnxb	protein-coding	Downregulated
ENSMUSG00000033706	426.4589523	-0.25602608	0.418624869	0.037504887	0.505526591	Smyd5	protein-coding	Downregulated
ENSMUSG00000033790	412.8589824	-0.362935241	0.676516273	0.021558164	0.407281583	Tubgcp5	protein-coding	Downregulated
ENSMUSG00000033837	16.61998456	6.005486014	3.725610799	0.001017488	0.076272359	Foxh1	protein-coding	Upregulated
ENSMUSG00000034042	1300.522572	-1.509116465	0.707263275	0.001444603	0.097901282	Gpbp1l1	protein-coding	Downregulated
ENSMUSG00000034156	641.1417139	2.885339238	1.17106714	0.000161674	0.020939519	Tspoap1	protein-coding	Upregulated
ENSMUSG00000034171	138.8723097	-0.200551252	0.36582582	0.02022712	0.393823209	Faah	protein-coding	Downregulated
ENSMUSG00000034487	237.4689888	-2.081257629	0.770362717	0.000279662	0.030409696	Poglut3	protein-coding	Downregulated
ENSMUSG00000034509	95.78776009	0.152122738	0.309095744	0.040316245	0.517947917	Mad2l1bp	protein-coding	Upregulated
ENSMUSG00000034532	117.5065651	-4.313021194	1.185381421	0.0000369344	0.007000413	Fbxo16	protein-coding	Downregulated
ENSMUSG00000034575	588.1431755	0.202849888	0.35979312	0.026165484	0.439079681	Tent4a	protein-coding	Upregulated
ENSMUSG00000034685	233.9017278	-0.164458477	0.322633294	0.023797426	0.421572485	Fam171a2	protein-coding	Downregulated
ENSMUSG00000034799	129.259098	0.246412296	0.457304204	0.00670604	0.234038782	Unc13a	protein-coding	Upregulated
ENSMUSG00000034850	542.5461264	-0.230916489	0.389046692	0.040179633	0.517264	Tmem127	protein-coding	Downregulated
ENSMUSG00000034903	552.8863514	-0.188571396	0.343560388	0.033936683	0.487100664	Cobll1	protein-coding	Downregulated
ENSMUSG00000035069	132.5813742	-0.17564992	0.326257446	0.042771687	0.528704321	Oma1	protein-coding	Downregulated
ENSMUSG00000035439	158.3897587	-0.183182572	0.343218509	0.020716064	0.398957622	Haus8	protein-coding	Downregulated
ENSMUSG00000035547	1083.134129	-0.217066525	0.374887905	0.029194082	0.457248806	Capn5	protein-coding	Downregulated
ENSMUSG00000035704	106.3098625	-0.238417323	0.44387972	0.006481811	0.229651148	Alg8	protein-coding	Downregulated
ENSMUSG00000036052	93.96059005	0.144681214	0.309134852	0.009714452	0.276708964	Dnajb5	protein-coding	Upregulated
ENSMUSG00000036078	196.2118426	-1.433866115	0.952294141	0.002974848	0.155848606	Sigmar1	protein-coding	Downregulated
ENSMUSG00000036580	524.3273123	-0.830127828	0.984328711	0.008840843	0.261914293	Spart	protein-coding	Downregulated
ENSMUSG00000036737	697.7405282	-0.261892725	0.457592042	0.023214861	0.417922832	Oxsr1	protein-coding	Downregulated
ENSMUSG00000037257	1033.757446	-0.247174963	0.457659721	0.007093754	0.242487822	Aagab	protein-coding	Downregulated
ENSMUSG00000037363	183.2062336	-0.19143157	0.359261786	0.014217037	0.332593558	Letm2	protein-coding	Downregulated
ENSMUSG00000037411	273.2504761	4.592248703	2.007168657	0.000143274	0.019616595	Serpine1	protein-coding	Upregulated
ENSMUSG00000037443	488.9007996	-1.342080289	1.016560981	0.00335537	0.16433558	Cep85	protein-coding	Downregulated
ENSMUSG00000037773	129.1658789	-0.24185879	0.433778968	0.017117626	0.363776857	Pced1a	protein-coding	Downregulated
ENSMUSG00000037868	238.9837363	0.163679053	0.32935968	0.005320285	0.208362419	Egr2	protein-coding	Upregulated
ENSMUSG00000037902	749.8132073	-0.18141089	0.350825742	0.002730157	0.148710656	Sirpa	protein-coding	Downregulated
ENSMUSG00000038039	882.0077361	-0.178914243	0.336406208	0.022791325	0.413811651	Gcc2	protein-coding	Downregulated
ENSMUSG00000038055	107.0101239	-0.194411529	0.362136089	0.013901158	0.330565338	Dexi	protein-coding	Downregulated
ENSMUSG00000038151	60.97751498	3.788803306	1.75568545	0.000328194	0.034157088	Prdm1	protein-coding	Upregulated
ENSMUSG00000038671	309.8344824	-0.22743135	0.400188748	0.019810648	0.389086468	Arfrp1	protein-coding	Downregulated
ENSMUSG00000038774	958.1613095	-0.176555384	0.329970527	0.044602257	0.536262209	Ascc3	protein-coding	Downregulated
ENSMUSG00000039253	328.4224636	-0.296054402	0.526799066	0.018407148	0.376158069	Fn3krp	protein-coding	Downregulated
ENSMUSG00000039308	384.1649899	0.139410661	0.3038814	0.003265718	0.161986551	Ndst2	protein-coding	Upregulated
ENSMUSG00000039367	1172.849033	-0.198926147	0.371795024	0.010872339	0.293849311	Sec24c	protein-coding	Downregulated
ENSMUSG00000039384	386.512079	0.197604531	0.352993251	0.029946057	0.463495453	Dusp10	protein-coding	Upregulated
ENSMUSG00000039693	212.9734047	-0.233389621	0.412724916	0.017496879	0.367133037	Msantd3	protein-coding	Downregulated
ENSMUSG00000039765	260.6114134	-0.211322086	0.381378545	0.015312304	0.342439326	Cc2d2a	protein-coding	Downregulated
ENSMUSG00000039781	659.5876339	-0.224256719	0.388397066	0.03325399	0.483519356	Cep131	protein-coding	Downregulated
ENSMUSG00000040549	1581.011898	-0.21059251	0.360752412	0.046618771	0.545728393	Ckap5	protein-coding	Downregulated
ENSMUSG00000040640	37.09853985	-0.202674765	0.392664664	0.000572487	0.050363748	Erc2	protein-coding	Downregulated
ENSMUSG00000040918	179.3195979	2.321026787	1.334848916	0.001081237	0.078686823	Slc19a2	protein-coding	Upregulated
ENSMUSG00000041263	343.5853254	1.782204179	0.82684037	0.00052767	0.047680466	Rusc1	protein-coding	Upregulated
ENSMUSG00000041351	92.69114953	-0.15506336	0.316264464	0.01736974	0.366155745	Rap1gap	protein-coding	Downregulated
ENSMUSG00000041879	1309.765424	-0.189472741	0.341486954	0.041672487	0.524206758	Ipo9	protein-coding	Downregulated
ENSMUSG00000041920	364.1920529	0.14541185	0.309094301	0.009293112	0.269130818	Slc16a6	protein-coding	Upregulated
ENSMUSG00000041921	249.5487802	1.979713661	1.099534324	0.000548924	0.049342957	Metap1d	protein-coding	Upregulated
ENSMUSG00000042105	274.0859358	-1.931777949	0.923623294	0.000990545	0.074492208	Inpp5f	protein-coding	Downregulated
ENSMUSG00000042202	458.7521909	0.204280006	0.357454835	0.033030778	0.482508948	Slc35e2	protein-coding	Upregulated
ENSMUSG00000042473	384.3802047	-0.170047509	0.322131729	0.046632682	0.545728393	Tbc1d8b	protein-coding	Downregulated
ENSMUSG00000042607	26.48828095	5.246655283	1.959877777	0.000163163	0.021015559	Asb4	protein-coding	Upregulated
ENSMUSG00000042677	565.8702545	0.167488951	0.332541852	0.002594656	0.143679868	Zc3h12a	protein-coding	Upregulated
ENSMUSG00000042745	501.0731424	0.160795328	0.33063082	0.000288254	0.030951435	Id1	protein-coding	Upregulated
ENSMUSG00000044072	78.80149625	0.141547996	0.301421071	0.037865504	0.507041066	Eml6	protein-coding	Upregulated
ENSMUSG00000045503	338.5251618	0.140073871	0.304262406	0.003339659	0.164256274	Sys1	protein-coding	Upregulated
ENSMUSG00000045659	441.5129797	-3.166218075	1.183834654	0.000066548	0.01084919	Plekha7	protein-coding	Downregulated
ENSMUSG00000046598	135.769941	-0.266865723	0.545272256	0.000183101	0.022585329	Bdh1	protein-coding	Downregulated
ENSMUSG00000046897	903.5355801	-0.263379412	0.459698484	0.025305854	0.432201737	Zfp740	protein-coding	Downregulated
ENSMUSG00000047227	43.20412585	5.175005497	2.912184272	0.000495292	0.046186981	Gm527	protein-coding	Upregulated
ENSMUSG00000047648	483.2145279	0.2858729	0.489607949	0.019356164	0.384042775	Fbxo30	protein-coding	Upregulated
ENSMUSG00000047719	102.9982542	-0.222194538	0.41031383	0.008737753	0.261151101	Ubiad1	protein-coding	Downregulated
ENSMUSG00000048222	1114.530133	-0.385637215	0.672868341	0.020741073	0.398957622	Mfap1b	protein-coding	Downregulated
ENSMUSG00000048920	320.2068105	-0.187777348	0.345309084	0.029039343	0.456857684	Fkrp	protein-coding	Downregulated
ENSMUSG00000048960	225.2271976	-0.318207478	0.791539059	0.000478945	0.044841967	Prex2	protein-coding	Downregulated
ENSMUSG00000049882	114.4060846	3.301069642	2.06128332	0.000279417	0.030409696	Vcpkmt	protein-coding	Upregulated
ENSMUSG00000050052	84.95721002	4.013461282	1.400463951	0.0000919615	0.013683895	Tdrp	protein-coding	Upregulated
ENSMUSG00000050079	466.2704333	-0.160052486	0.313409312	0.049839786	0.562126237	Rspry1	protein-coding	Downregulated
ENSMUSG00000050106	239.2958351	-0.289998666	0.595972486	0.002349727	0.134957749	Tmc8	protein-coding	Downregulated
ENSMUSG00000050503	119.6708713	4.119117461	2.11581085	0.000150023	0.019985692	Fbxl22	protein-coding	Upregulated
ENSMUSG00000051146	122.4049689	0.141854956	0.302777516	0.021455742	0.406334457	Camk2n2	protein-coding	Upregulated
ENSMUSG00000051224	131.8997718	-0.167759776	0.333117639	0.006695019	0.234004482	Tceanc	protein-coding	Downregulated
ENSMUSG00000051950	182.3021462	-1.228843576	1.345859647	0.006351235	0.228850595	B3glct	protein-coding	Downregulated
ENSMUSG00000052293	195.1389331	-0.185024002	0.343355474	0.032854329	0.481957219	Taf9	protein-coding	Downregulated
ENSMUSG00000052369	278.8209309	-0.157998717	0.312837319	0.04659995	0.545728393	Tmem106c	protein-coding	Downregulated
ENSMUSG00000052609	330.4452545	-0.157173318	0.314659907	0.035405939	0.494262669	Plekhg3	protein-coding	Downregulated
ENSMUSG00000052727	101.6555519	0.14054984	0.301465377	0.030618742	0.468910422	Map1b	protein-coding	Upregulated
ENSMUSG00000052763	426.7704798	-0.163902671	0.322495629	0.024599739	0.425865017	Zfp212	protein-coding	Downregulated
ENSMUSG00000053581	448.9614695	2.731570659	0.898655442	0.0000366151	0.006996781	Zfand2a	protein-coding	Upregulated
ENSMUSG00000054555	34.30365115	-0.157732679	0.319238711	0.021423135	0.406203967	Adam12	protein-coding	Downregulated
ENSMUSG00000054619	621.1199379	-0.293685679	0.53086838	0.015383971	0.342439326	Mettl7a1	protein-coding	Downregulated
ENSMUSG00000054659	90.35002878	3.202259657	1.674994309	0.000930317	0.070817096	Pm20d2	protein-coding	Upregulated
ENSMUSG00000054720	976.9553721	0.253722777	0.462294094	0.010781872	0.292276477	Lrrc8c	protein-coding	Upregulated
ENSMUSG00000055629	109.7140309	2.986814571	0.954727476	0.0000364121	0.006996781	B4galnt4	protein-coding	Upregulated
ENSMUSG00000055652	216.5879632	0.179115829	0.341398359	0.019210801	0.382605087	Klhl25	protein-coding	Upregulated
ENSMUSG00000056145	444.8234247	0.208799717	0.371018634	0.023893967	0.422383991	AI504432	ncRNA	Upregulated
ENSMUSG00000056486	61.04788446	-0.155065553	0.313214415	0.027765894	0.448305753	Chn1	protein-coding	Downregulated
ENSMUSG00000057101	362.3658063	-1.109850216	1.029876558	0.007494259	0.247399063	Zfp180	protein-coding	Downregulated
ENSMUSG00000058690	470.0070844	-0.301997688	0.595292439	0.006181182	0.225511583	Ccser2	protein-coding	Downregulated
ENSMUSG00000059674	153.0854534	4.410653989	1.969175195	0.0000620834	0.010264897	Cdh24	protein-coding	Upregulated
ENSMUSG00000059995	636.6522082	-0.256325921	0.430336928	0.021960624	0.409078341	Atxn7l3	protein-coding	Downregulated
ENSMUSG00000060681	251.0181416	-1.657499386	0.927479952	0.001849225	0.114050197	Slc9a6	protein-coding	Downregulated
ENSMUSG00000061130	945.7148674	-0.816761713	0.92031717	0.009185413	0.267674425	Ppm1b	protein-coding	Downregulated
ENSMUSG00000061313	415.1226802	-0.250394688	0.456315718	0.014033436	0.330834085	Ddhd2	protein-coding	Downregulated
ENSMUSG00000062797	166.6200102	-3.087687007	0.813459486	0.00000984931	0.002579965	Hikeshi	protein-coding	Downregulated
ENSMUSG00000063317	920.7620054	-2.746968784	0.918178616	0.0000996733	0.014432824	Usp31	protein-coding	Downregulated
ENSMUSG00000063605	74.18080899	-3.2176732	1.001242925	0.0000565201	0.009617912	Ccdc102a	protein-coding	Downregulated
ENSMUSG00000063652	50.14187046	4.22297666	1.600111287	0.0000301934	0.006016237	Slc22a21	protein-coding	Upregulated
ENSMUSG00000064068	313.9915315	-0.23456605	0.40051215	0.031461954	0.474880487	Mtx1	protein-coding	Downregulated
ENSMUSG00000064141	123.3521163	4.300350471	1.614947142	0.0000971008	0.014174912	Zfp69	protein-coding	Upregulated
ENSMUSG00000066829	176.8764805	-0.33315365	0.692296608	0.008865052	0.261914293	Zfp810	protein-coding	Downregulated
ENSMUSG00000068079	405.5123857	0.172058007	0.324676149	0.028285575	0.449308919	Tcf15	protein-coding	Upregulated
ENSMUSG00000068587	32.63131722	-0.155865366	0.324525783	0.00195169	0.119109273	Mgam	protein-coding	Downregulated
ENSMUSG00000069237	205.0347019	-0.187705418	0.362902256	0.00208691	0.123796755	Fam8a1	protein-coding	Downregulated
ENSMUSG00000070738	1235.86588	0.175985292	0.328305982	0.033276132	0.483519356	Dgkd	protein-coding	Upregulated
ENSMUSG00000070780	122.0509154	-0.165455564	0.330356667	0.010670683	0.290328835	Rbm47	protein-coding	Downregulated
ENSMUSG00000071281	109.0956026	2.244078478	1.934748612	0.001534033	0.102179772	Zfp65	protein-coding	Upregulated
ENSMUSG00000071369	497.4397716	-0.228901014	0.414466575	0.010051731	0.279303945	Map3k5	protein-coding	Downregulated
ENSMUSG00000072235	1344.969736	0.177841199	0.338199697	0.015947351	0.349089765	Tuba1a	protein-coding	Upregulated
ENSMUSG00000072772	575.2204993	0.197081369	0.350813936	0.027448929	0.446829268	Grcc10	protein-coding	Upregulated
ENSMUSG00000073418	39.60991644	6.013779985	1.770900749	0.0000319733	0.006217032	C4b	protein-coding	Upregulated
ENSMUSG00000073771	98.91091964	0.148329024	0.304451158	0.036862907	0.503335384	Btbd19	protein-coding	Upregulated
ENSMUSG00000073910	45.60331957	2.634938211	1.255087535	0.000825349	0.0645683	Mob3b	protein-coding	Upregulated
ENSMUSG00000074671	364.5883518	-1.487559764	1.098467153	0.003950032	0.17776607	Tspyl3	protein-coding	Downregulated
ENSMUSG00000074802	504.0788348	-0.321337327	0.652668756	0.008989253	0.263937604	Gas2l3	protein-coding	Downregulated
ENSMUSG00000074811	79.55644711	0.172262166	0.334359719	0.014356511	0.334693331	Hps6	protein-coding	Upregulated
ENSMUSG00000078485	221.4064726	2.208863139	0.94873691	0.000355402	0.036023828	Plekhn1	protein-coding	Upregulated
ENSMUSG00000078584	291.3793985	-3.846745973	0.98323552	0.00000781644	0.00214382	AU022252	protein-coding	Downregulated
ENSMUSG00000078903	96.78087893	0.149588057	0.309308271	0.024204702	0.423955085	Gm14391	protein-coding	Upregulated
ENSMUSG00000080810	19.27417303	4.532247372	2.515872986	0.001626209	0.105310572			Upregulated
ENSMUSG00000084796	368.6594745	0.161899124	0.316583563	0.032492609	0.481052061			Upregulated
ENSMUSG00000084998	68.91788733	0.139897796	0.310646116	0.000427198	0.041496917			Upregulated
ENSMUSG00000085208	456.1588356	-0.886461259	0.940757614	0.008545023	0.260405393	Brip1os	ncRNA	Downregulated
ENSMUSG00000086502	92.35028399	-1.488902922	1.184789428	0.004754381	0.196344456			Downregulated
ENSMUSG00000087088	116.6332116	2.991834792	1.438387581	0.000230014	0.026546103	Gm16638	ncRNA	Upregulated
ENSMUSG00000087177	159.8639263	0.214395804	0.375800006	0.030701311	0.468910422	E130307A14Rik	ncRNA	Upregulated
ENSMUSG00000087590	229.1098321	0.155056487	0.309050199	0.036996285	0.503335384	Epb41l4aos	ncRNA	Upregulated
ENSMUSG00000087598	386.5475798	-0.261043736	0.457265058	0.020602228	0.397599121	Zfp111	protein-coding	Downregulated
ENSMUSG00000089417	1512.422891	0.248289733	0.412977283	0.027178802	0.446210861	Gm22009	ncRNA	Upregulated
ENSMUSG00000091512	163.4470471	-0.167150882	0.323325907	0.038723376	0.51176761	Lamtor3	protein-coding	Downregulated
ENSMUSG00000092274	3265.555642	1.901151301	0.654470319	0.000117941	0.016651494	Neat1	ncRNA	Upregulated
ENSMUSG00000092569	122.9580908	2.273256445	1.362716356	0.000725564	0.059101631			Upregulated
ENSMUSG00000095276	1537.322948	0.184894796	0.35215709	0.010404254	0.285694204	Gfy	protein-coding	Upregulated
ENSMUSG00000096795	41.59385772	-0.175127579	0.347185042	0.001151064	0.082568483	Zfp433	protein-coding	Downregulated
ENSMUSG00000097277	35.3923541	5.236100625	1.511592512	0.0000222569	0.004760331	2900076A07Rik	ncRNA	Upregulated
ENSMUSG00000097318	40.19268008	-0.177153176	0.353239166	0.00080015	0.063233523	1700007L15Rik	ncRNA	Downregulated
ENSMUSG00000097855	41.52058817	0.143995378	0.314337519	0.000243718	0.027893632	A930007I19Rik	ncRNA	Upregulated
ENSMUSG00000097887	43.02575746	3.400858101	2.234630831	0.001472091	0.09890162			Upregulated
ENSMUSG00000099241	437.4353898	3.915550594	2.228927334	0.00000146356	0.000541587	Gvin-ps2	pseudo	Upregulated
ENSMUSG00000102964	133.3305742	4.100212144	1.78300843	0.000051217	0.008977605			Upregulated
ENSMUSG00000103085	114.6496839	1.954455353	2.54109759	0.001766588	0.111309355			Upregulated
ENSMUSG00000103937	67.15908272	4.73039055	2.607359725	0.0000827211	0.01252258			Upregulated
ENSMUSG00000104125	82.97915424	3.956604083	1.493833856	0.0000189338	0.004203843			Upregulated
ENSMUSG00000104164	43.20111178	-0.175689928	0.347526772	0.003211338	0.16123345			Downregulated
ENSMUSG00000104324	57.87068725	5.223093773	2.605619642	0.000455903	0.043381539			Upregulated
ENSMUSG00000104339	129.0372342	4.488907248	1.59929777	0.0000134596	0.003137951			Upregulated
ENSMUSG00000105340	39.81293835	4.958964213	1.838624285	0.000143047	0.019616595			Upregulated
ENSMUSG00000106149	123.1215602	3.172355628	0.917936077	0.0000199875	0.004395932			Upregulated
ENSMUSG00000106847	1601.34057	-0.277012815	0.463932055	0.025716023	0.434748112	Peg13	ncRNA	Downregulated
ENSMUSG00000110366	88.74553047	-0.163051916	0.320524966	0.019264062	0.382867074			Downregulated
ENSMUSG00000111264	146.7798777	3.714549495	1.338316959	0.000157344	0.020492568			Upregulated
ENSMUSG00000113015	23.47962987	3.668013226	4.147515019	0.000680205	0.057195453			Upregulated
ENSMUSG00000114354	22.75831888	8.307657857	3.221408914	0.0000211623	0.004610809			Upregulated
ENSMUSG00000114755	45.05449152	-0.234073113	0.456855604	0.000666978	0.056337894	Galr3	protein-coding	Downregulated
ENSMUSG00000116004	1540.287553	-0.164467791	0.337095488	0.000026668	0.005550982			Downregulated
ENSMUSG00000116733	72.51104828	-6.837589783	1.785524387	0.00000202673	0.000715897			Downregulated
ENSMUSG00000118588	709.6960602	0.14193074	0.300428353	0.026862159	0.443510988			Upregulated
ENSMUSG00000118667	179.5134841	3.926619606	1.512167927	0.0000745386	0.011662533	Ahnak2	protein-coding	Upregulated
ENSMUSG00000120055	21.61988887	3.738742609	2.289555008	0.00104587	0.077650888			Upregulated
ENSMUSG00000120144	462.3765114	-0.258241267	0.426845016	0.034052979	0.487340153			Downregulated
ENSMUSG00000121275	34.07133965	5.412007319	2.116966293	0.00042091	0.041057205			Upregulated
ENSMUSG00000121490	36.80199402	3.467212183	1.49712156	0.000504159	0.046354745	C920006O11Rik	ncRNA	Upregulated
ENSMUSG00002076896	1203.571346	0.179681228	0.326427592	0.041825954	0.524523107			Upregulated
ENSMUSG00002076937	71.40235022	-9.57517815	3.025351544	0.000000226559	0.000107791			Downregulated

## Sheet: Tet2--LPS vs Tet2-- p<0.05
Table S2. Differentially expressed genes (DEG) inTet2-/- LPS vs Tet2-/- pvalue<0.05; 0.9<FC<1.1
ENSEMBL	baseMean	log2FoldChange	lfcSE	pvalue	padj	symbol	biotype	status
ENSMUSG00000038167	73.66716958	-6.394809309	1.122769651	0.00000000147701	0.000000662184	Plekhg6	protein-coding	Downregulated
ENSMUSG00000067889	48.85910422	-6.340436679	1.431252006	0.0000000457658	0.0000166709	Sptbn2	protein-coding	Downregulated
ENSMUSG00000022629	260.6713874	-5.666276465	1.346193921	0.000000172295	0.0000573817	Kif21a	protein-coding	Downregulated
ENSMUSG00000036782	56.95562541	-5.735048534	1.278998657	0.000000197063	0.0000647061	Klhl13	protein-coding	Downregulated
ENSMUSG00000037855	51.39698603	-6.35844625	1.483423582	0.000000233766	0.0000746547	Zfp365	protein-coding	Downregulated
ENSMUSG00000098387	78.94799927	-5.424902994	1.453992076	0.000000278022	0.0000864202	Pet117	protein-coding	Downregulated
ENSMUSG00000016995	236.3177288	-3.895974488	1.004533444	0.000000307285	0.0000942595	Matn4	protein-coding	Downregulated
ENSMUSG00000003227	58.24113028	-4.395393234	1.126879837	0.000000743381	0.000216631	Edar	protein-coding	Downregulated
ENSMUSG00000034532	117.5065651	-4.697179866	1.193500225	0.00000124907	0.000355116	Fbxo16	protein-coding	Downregulated
ENSMUSG00000050199	60.243108	-4.025160092	1.008450224	0.00000222949	0.000618763	Lgr4	protein-coding	Downregulated
ENSMUSG00000004612	252.1836617	2.687373101	0.703262143	0.0000050377	0.001365628	Nkg7	protein-coding	Upregulated
ENSMUSG00000121458	1242.390835	6.377752291	2.003971014	0.00000676854	0.001772977	AW822252	ncRNA	Upregulated
ENSMUSG00000042345	254.261016	3.095024076	0.928052947	0.00000857475	0.002196737	Ubash3a	protein-coding	Upregulated
ENSMUSG00000102960	24.03303215	-0.180614046	0.408461782	0.0000104316	0.002614963			Downregulated
ENSMUSG00000052854	157.029811	-0.31634653	0.629718895	0.0000111522	0.002765853	Nrk	protein-coding	Downregulated
ENSMUSG00000040883	88.74685269	3.983538202	1.526776503	0.0000160628	0.003900753	Tmem205	protein-coding	Upregulated
ENSMUSG00000058883	46.11477777	-0.354265201	0.761058309	0.0000192725	0.004545144	Zfp708	protein-coding	Downregulated
ENSMUSG00000029298	106.7961038	-4.060163196	1.201466257	0.0000193031	0.004545144	Gbp9	protein-coding	Downregulated
ENSMUSG00000115543	19.53975693	-0.252161541	0.498234876	0.0000194962	0.004545144			Downregulated
ENSMUSG00000102625	40.23055536	-0.287907038	0.565026026	0.0000249939	0.005769146			Downregulated
ENSMUSG00000078370	35.35869802	5.667803436	2.475529415	0.0000255194	0.005832682	Gm6316	pseudo	Upregulated
ENSMUSG00000029299	137.9761817	-0.167266119	0.392826514	0.0000259294	0.005868848	Abcg3	protein-coding	Downregulated
ENSMUSG00000041362	72.22692136	-3.023547982	0.947523296	0.0000278948	0.00625299	Shtn1	protein-coding	Downregulated
ENSMUSG00000040428	64.26642604	-3.641371688	1.123641745	0.0000282592	0.006274349	Plekha4	protein-coding	Downregulated
ENSMUSG00000046157	455.3573207	2.198415682	0.686041242	0.0000310054	0.006819141	Tmem229b	protein-coding	Upregulated
ENSMUSG00000031824	54.20918735	-0.289335631	0.56208493	0.0000402925	0.00877886	6430548M08Rik	protein-coding	Downregulated
ENSMUSG00000019122	201.8197334	3.031750211	1.962653328	0.0000524039	0.011006229	Ccl9	protein-coding	Upregulated
ENSMUSG00000034799	129.259098	-2.265476583	0.732336553	0.0000541925	0.011280269	Unc13a	protein-coding	Downregulated
ENSMUSG00000079138	79.53963196	0.165250039	0.388601445	0.0000664277	0.013704686			Upregulated
ENSMUSG00000031398	232.3974239	-0.219885501	0.442372073	0.0000724649	0.014704322	Plxna3	protein-coding	Downregulated
ENSMUSG00000031870	98.4727019	-0.236103852	0.464795457	0.0000806171	0.016201947	Pgr	protein-coding	Downregulated
ENSMUSG00000056481	26.32732358	-4.086114787	1.373310622	0.0000982877	0.019467454	Cd248	protein-coding	Downregulated
ENSMUSG00000020493	246.4502258	3.168956546	1.626268072	0.000099227	0.019467454	Prr11	protein-coding	Upregulated
ENSMUSG00000063415	157.9870145	-2.775017488	1.215238265	0.0000997862	0.019467454	Cyp26b1	protein-coding	Downregulated
ENSMUSG00000041351	92.69114953	-2.783865849	1.052665228	0.000100206	0.019467454	Rap1gap	protein-coding	Downregulated
ENSMUSG00000029322	1081.754069	2.410477767	0.855901828	0.000108441	0.020721938	Plac8	protein-coding	Upregulated
ENSMUSG00000061086	33.43836418	-0.426075516	1.214086911	0.000110382	0.020752669	Myl4	protein-coding	Downregulated
ENSMUSG00000025213	30.29732283	-3.297078542	1.138143612	0.000118108	0.022027668	Kazald1	protein-coding	Downregulated
ENSMUSG00000103495	22.57662813	-0.157297216	0.385604367	0.000130029	0.02386903			Downregulated
ENSMUSG00000027954	22.57429274	-0.174521479	0.401175212	0.000142101	0.025435858	Efna1	protein-coding	Downregulated
ENSMUSG00000017716	298.1450176	3.128627472	2.139285943	0.000145988	0.025623519	Birc5	protein-coding	Upregulated
ENSMUSG00000037336	1369.893942	2.599527681	1.125605974	0.000146181	0.025623519	Mfsd2b	protein-coding	Upregulated
ENSMUSG00000057130	314.9454546	2.134994734	0.798106986	0.000148696	0.025869719	Txnl4a	protein-coding	Upregulated
ENSMUSG00000030509	391.054667	1.917462129	0.703598128	0.000150017	0.025906219	Asb7	protein-coding	Upregulated
ENSMUSG00000042589	80.12186858	-2.412357543	0.949210244	0.000159721	0.027379246	Cux2	protein-coding	Downregulated
ENSMUSG00000032218	391.6854254	2.1541685	0.784173599	0.000161778	0.027445104	Ccnb2	protein-coding	Upregulated
ENSMUSG00000024727	31.74484989	-0.195988774	0.423009165	0.000166756	0.027968177	Trpm6	protein-coding	Downregulated
ENSMUSG00000103976	44.10176218	-0.191201786	0.415451436	0.000177937	0.029630375			Downregulated
ENSMUSG00000064147	465.1247117	2.243588099	0.820746964	0.000180427	0.029691107	Rab44	protein-coding	Upregulated
ENSMUSG00000102428	48.19755685	-0.245502686	0.482893994	0.000180849	0.029691107	Pcdhga12	protein-coding	Downregulated
ENSMUSG00000114923	56.62323296	-0.185878647	0.410324697	0.000190659	0.030866838			Downregulated
ENSMUSG00000024548	131.5062063	-2.483208622	1.285424017	0.000195175	0.031344523	Setbp1	protein-coding	Downregulated
ENSMUSG00000069910	138.7908181	2.939194542	1.154073939	0.000197059	0.031344523	Spdl1	protein-coding	Upregulated
ENSMUSG00000027674	48.56060298	-3.160886049	1.57822981	0.000197643	0.031344523	Pex5l	protein-coding	Downregulated
ENSMUSG00000098176	81.43273831	-2.600956138	1.104710979	0.000208911	0.03290772	Ccdc166	protein-coding	Downregulated
ENSMUSG00000084071	44.69353888	-0.194243565	0.419577863	0.000229118	0.035848539	Gm13378	pseudo	Downregulated
ENSMUSG00000018362	372.2949306	1.673682311	0.612756163	0.000241422	0.037028055	Kpna2	protein-coding	Upregulated
ENSMUSG00000026172	239.5781741	2.431267997	1.376173842	0.000244828	0.037062891	Bcs1l	protein-coding	Upregulated
ENSMUSG00000015451	16.35229195	-0.202293715	0.427987377	0.000262489	0.039480052	C4a	protein-coding	Downregulated
ENSMUSG00000025776	401.5236377	-2.442783923	1.086694612	0.000265518	0.039679608	Crispld1	protein-coding	Downregulated
ENSMUSG00000024617	449.8273151	1.942557307	0.799906986	0.000267652	0.039743742	Camk2a	protein-coding	Upregulated
ENSMUSG00000070436	72.82113276	-0.21893822	0.442833139	0.000270831	0.039961344	Serpinh1	protein-coding	Downregulated
ENSMUSG00000036295	20.95830067	-0.257818897	0.502685632	0.000275854	0.040446413	Lrrn3	protein-coding	Downregulated
ENSMUSG00000051675	233.2426903	-1.804183684	0.691054498	0.000280616	0.040887515	Trim32	protein-coding	Downregulated
ENSMUSG00000023039	124.8706743	-2.21251595	0.906414237	0.000286327	0.041460435	Krt7	protein-coding	Downregulated
ENSMUSG00000087354	40.99660833	-2.560396964	1.012352086	0.000289945	0.041725295	4930404I05Rik	ncRNA	Downregulated
ENSMUSG00000010461	28.93995106	-0.184962732	0.407536629	0.000292058	0.041771464	Eya4	protein-coding	Downregulated
ENSMUSG00000033855	29.90748189	-0.304352625	0.593462778	0.000321516	0.045704304	Ston1	protein-coding	Downregulated
ENSMUSG00000116305	77.3372171	-0.209344948	0.431034344	0.000325656	0.046012201			Downregulated
ENSMUSG00000031520	145.1483821	-2.774759938	1.121018691	0.000333964	0.046808437	Vegfc	protein-coding	Downregulated
ENSMUSG00000054728	128.8425682	-2.062575349	0.846740641	0.000336782	0.046808437	Phactr1	protein-coding	Downregulated
ENSMUSG00000023092	177.3663152	-0.289012884	0.550823611	0.000352109	0.048157444	Fhl1	protein-coding	Downregulated
ENSMUSG00000026249	258.5069923	0.168834462	0.394826454	0.000353233	0.048157444	Serpine2	protein-coding	Upregulated
ENSMUSG00000026070	60.41958536	-0.305453035	0.583157215	0.000357594	0.048468574	Il18r1	protein-coding	Downregulated
ENSMUSG00000108621	465.4243471	-2.621538027	1.289738711	0.000372383	0.049713537	Gm33989	protein-coding	Downregulated
ENSMUSG00000079560	110.294009	-2.291743532	0.994501995	0.00037296	0.049713537	Hoxa3	protein-coding	Downregulated
ENSMUSG00000032561	58.36186197	-0.284522464	0.549088851	0.000373177	0.049713537	Acpp	protein-coding	Downregulated
ENSMUSG00000051166	353.3322613	-0.263112673	0.504440498	0.000376744	0.049890891	Eml5	protein-coding	Downregulated
ENSMUSG00000022893	348.7326985	-0.287615047	0.554009711	0.000378788	0.049890891	Adamts1	protein-coding	Downregulated
ENSMUSG00000004891	53.98843528	-2.824611571	1.164600376	0.000393932	0.051594085	Nes	protein-coding	Downregulated
ENSMUSG00000067653	46.09997729	-0.221369752	0.443817669	0.000400025	0.052099335	Ankrd23	protein-coding	Downregulated
ENSMUSG00000024427	29.17121942	-0.221538385	0.45112732	0.000423635	0.054867798	Spry4	protein-coding	Downregulated
ENSMUSG00000068263	437.4169459	-1.917016299	0.803122556	0.000444288	0.056599326	Efcc1	protein-coding	Downregulated
ENSMUSG00000046179	709.720479	1.784787505	0.743383695	0.000464224	0.058817717	E2f8	protein-coding	Upregulated
ENSMUSG00000021268	294.8322297	-0.223572059	0.450227415	0.000474015	0.059412453	Meg3	ncRNA	Downregulated
ENSMUSG00000044068	803.5955915	-1.886975828	0.869073435	0.000490826	0.060864988			Downregulated
ENSMUSG00000063108	403.8415977	-2.124938987	1.740045735	0.000501772	0.061893159	Zfp26	protein-coding	Downregulated
ENSMUSG00000120873	43.07317883	3.79139676	2.060600968	0.000515599	0.063263982			Upregulated
ENSMUSG00000020658	121.2287049	-2.002352478	0.900537319	0.000524995	0.064079605	Efr3b	protein-coding	Downregulated
ENSMUSG00000029866	68.82298744	-0.201731498	0.422188423	0.0005314	0.064457092	Kel	protein-coding	Downregulated
ENSMUSG00000022332	242.262675	-0.301482438	0.566022601	0.000536284	0.064457092	Khdrbs3	protein-coding	Downregulated
ENSMUSG00000058624	319.8103752	-0.261145156	0.503719773	0.000536382	0.064457092	Gda	protein-coding	Downregulated
ENSMUSG00000097318	40.19268008	2.853432167	1.399921157	0.000545755	0.065247144	1700007L15Rik	ncRNA	Upregulated
ENSMUSG00000034427	184.2721817	0.428212934	1.075632132	0.000548941	0.065293138	Myo15b	protein-coding	Upregulated
ENSMUSG00000097378	33.00531955	2.888256572	1.546028204	0.000562354	0.066549032	B230208H11Rik	ncRNA	Upregulated
ENSMUSG00000040918	179.3195979	2.114660296	1.077364574	0.000571322	0.067268785	Slc19a2	protein-coding	Upregulated
ENSMUSG00000023755	37.3370128	-0.278194393	0.536621521	0.000592415	0.069054837	Rhebl1	protein-coding	Downregulated
ENSMUSG00000001270	136.5323732	-2.420542044	1.238230902	0.000626298	0.071956182	Ckb	protein-coding	Downregulated
ENSMUSG00000069302	669.2792908	2.378731924	1.093509408	0.000626469	0.071956182	H2ac12	protein-coding	Upregulated
ENSMUSG00000020027	89.63821935	-1.789921527	0.756556394	0.000628462	0.071956182	Socs2	protein-coding	Downregulated
ENSMUSG00000029185	32.09093494	-0.323342832	0.630566402	0.000631971	0.071956182	Fam114a1	protein-coding	Downregulated
ENSMUSG00000030924	172.8541422	-2.326438221	1.069897446	0.000634219	0.071956182	Rexo5	protein-coding	Downregulated
ENSMUSG00000029638	194.7146405	-2.047072537	1.100994967	0.000635824	0.071956182	Glcci1	protein-coding	Downregulated
ENSMUSG00000021492	35.95533162	3.166905904	1.794002898	0.000676403	0.075685015	F12	protein-coding	Upregulated
ENSMUSG00000069300	639.1222037	2.231641199	1.748515507	0.000678513	0.075685015	H2bc11	protein-coding	Upregulated
ENSMUSG00000073427	59.06054303	-0.389076063	0.838321818	0.000698184	0.077307227	Gm4924	protein-coding	Downregulated
ENSMUSG00000101249	2860.703447	-1.773164286	0.869992032	0.000710496	0.078131073			Downregulated
ENSMUSG00000039126	205.2510182	-2.159321896	1.005901128	0.000720676	0.078189878	Prune2	protein-coding	Downregulated
ENSMUSG00000069305	412.8444028	0.207448752	0.427218495	0.000721092	0.078189878	H4c18	protein-coding	Upregulated
ENSMUSG00000035390	33.51366834	-2.576654852	1.337275406	0.000730471	0.078840102	Brsk1	protein-coding	Downregulated
ENSMUSG00000047821	301.9182205	1.834172519	0.873142824	0.000742159	0.079732479	Trim16	protein-coding	Upregulated
ENSMUSG00000048200	60.10483314	-2.244862623	1.112950945	0.000749689	0.079990159	Cracr2b	protein-coding	Downregulated
ENSMUSG00000092118	142.9787207	0.312893812	0.580928633	0.000754796	0.079990159	Fancf	protein-coding	Upregulated
ENSMUSG00000058665	65.00779981	2.207865212	1.066020757	0.000754851	0.079990159	En1	protein-coding	Upregulated
ENSMUSG00000028017	77.40316826	-1.999202959	0.947377473	0.000759305	0.080098109	Egf	protein-coding	Downregulated
ENSMUSG00000025885	89.33179662	-0.38210948	0.83695455	0.000781174	0.081574071	Myo5b	protein-coding	Downregulated
ENSMUSG00000031162	465.8313596	2.205401981	1.391659282	0.000803002	0.083048086	Gata1	protein-coding	Upregulated
ENSMUSG00000043913	103.8462289	-2.045556263	1.062789233	0.000808831	0.083067294	Ccdc60	protein-coding	Downregulated
ENSMUSG00000109982	30.07115814	0.14348394	0.374858946	0.000815924	0.083428233			Upregulated
ENSMUSG00000080059	43.31835143	4.112357963	2.265843322	0.000851944	0.0859052	Rps19-ps3	pseudo	Upregulated
ENSMUSG00000063568	18.90879426	-0.155800636	0.383752598	0.000885291	0.088170304	Jazf1	protein-coding	Downregulated
ENSMUSG00000069266	452.5287288	1.789185907	0.876280902	0.000891311	0.088170304	H4c2	protein-coding	Upregulated
ENSMUSG00000058773	1932.380483	1.703143342	0.79105508	0.000893116	0.088170304	H1f5	protein-coding	Upregulated
ENSMUSG00000022199	140.3872085	-1.614847697	0.735152354	0.000896339	0.088170304	Slc22a17	protein-coding	Downregulated
ENSMUSG00000096883	134.8296626	-0.330566404	0.617566464	0.000908408	0.08898196	Shisa8	protein-coding	Downregulated
ENSMUSG00000077564	64.35972882	2.803981796	1.697855037	0.000912801	0.088987046	Gm23202	snoRNA	Upregulated
ENSMUSG00000044244	50.15218407	0.142897137	0.374684754	0.000918922	0.088987046	Il20rb	protein-coding	Upregulated
ENSMUSG00000104324	57.87068725	-0.189796672	0.413698198	0.000919911	0.088987046			Downregulated
ENSMUSG00000030032	29.04284082	2.727019318	2.118000533	0.000937088	0.090274128	Wdr54	protein-coding	Upregulated
ENSMUSG00000055333	59.24333361	-2.188317302	1.587462976	0.000949485	0.091091963	Fat2	protein-coding	Downregulated
ENSMUSG00000003273	25.36775999	-0.159103064	0.384437002	0.000964983	0.091823028	Car11	protein-coding	Downregulated
ENSMUSG00000029090	402.7403089	-1.545961665	0.713927949	0.001008458	0.094980875	Adgra3	protein-coding	Downregulated
ENSMUSG00000034872	96.15565787	-1.941671542	1.060714114	0.001016892	0.094980875	Gipc3	protein-coding	Downregulated
ENSMUSG00000023075	360.5350055	1.880560483	1.032211426	0.001018352	0.094980875	Akirin1	protein-coding	Upregulated
ENSMUSG00000018752	57.95751375	2.115108218	1.635305585	0.00101854	0.094980875	Tnfsfm13	protein-coding	Upregulated
ENSMUSG00000065105	36.29758475	0.160188539	0.384867923	0.001029216	0.09559404	Gm26130	snoRNA	Upregulated
ENSMUSG00000047592	46.32965541	-2.20038151	1.090482648	0.001074193	0.098982825	Nxpe5	protein-coding	Downregulated
ENSMUSG00000099583	1563.171229	0.237841694	0.460295914	0.001115167	0.102353932	H3c4	protein-coding	Upregulated
ENSMUSG00000103485	22.18147296	-0.231695048	0.458901925	0.001131609	0.103306878			Downregulated
ENSMUSG00000029504	470.4972372	0.206010448	0.425837518	0.001135029	0.103306878	Ddx51	protein-coding	Upregulated
ENSMUSG00000037243	227.8086793	1.462825231	0.676984733	0.001138844	0.103306878	Zfp692	protein-coding	Upregulated
ENSMUSG00000022210	353.1692193	0.230231426	0.449963424	0.001174005	0.105530891	Dhrs4	protein-coding	Upregulated
ENSMUSG00000019891	17.94741061	-0.293812092	0.564907981	0.001214038	0.108440064	Dcbld1	protein-coding	Downregulated
ENSMUSG00000002835	1215.564779	0.263611452	0.494429052	0.001221913	0.108603693	Chaf1a	protein-coding	Upregulated
ENSMUSG00000006356	74.12048168	0.221717755	0.440759062	0.001225186	0.108603693	Crip2	protein-coding	Upregulated
ENSMUSG00000040040	230.3418963	0.253428002	0.482170719	0.001231251	0.108727875	Ift88	protein-coding	Upregulated
ENSMUSG00000035109	43.49055398	-2.206228486	1.149566182	0.001248043	0.109794826	Shc4	protein-coding	Downregulated
ENSMUSG00000094777	6354.025851	1.703738638	0.799393418	0.001262503	0.110501855	H2ac24	protein-coding	Upregulated
ENSMUSG00000050106	239.2958351	-1.816794838	0.984956037	0.001265606	0.110501855	Tmc8	protein-coding	Downregulated
ENSMUSG00000050552	223.6940786	1.7158814	1.316354979	0.0012703	0.110501855	Lamtor4	protein-coding	Upregulated
ENSMUSG00000033276	46.64858685	-2.152352471	1.279658523	0.00127806	0.110763646	Stk36	protein-coding	Downregulated
ENSMUSG00000030137	372.4980726	2.054311366	1.345907113	0.00129381	0.111713291	Tuba8	protein-coding	Upregulated
ENSMUSG00000028252	171.5047637	-1.896409395	1.26291625	0.001303399	0.112125957	Ccnc	protein-coding	Downregulated
ENSMUSG00000019856	313.1821928	-1.722357347	1.497269306	0.001313263	0.112559179	Fam184a	protein-coding	Downregulated
ENSMUSG00000030882	87.60607611	-0.227327034	0.454007415	0.001320771	0.112788079	Dnhd1	protein-coding	Downregulated
ENSMUSG00000024480	295.8127607	1.814108866	1.06491616	0.001328181	0.112887239	Ap3s1	protein-coding	Upregulated
ENSMUSG00000019467	163.8422322	-0.477007051	1.439967447	0.001336183	0.112887239	Arhgef25	protein-coding	Downregulated
ENSMUSG00000034035	41.43466749	-2.343732424	1.350091194	0.001341561	0.112887239	Ccdc17	protein-coding	Downregulated
ENSMUSG00000026049	175.409826	1.840717796	1.354484734	0.001343417	0.112887239	Tex30	protein-coding	Upregulated
ENSMUSG00000038151	60.97751498	-0.265975351	0.501751949	0.001346144	0.112887239	Prdm1	protein-coding	Downregulated
ENSMUSG00000001418	362.6584239	0.224864243	0.443694261	0.001369983	0.114474575	Glmp	protein-coding	Upregulated
ENSMUSG00000004561	136.8852231	0.176584769	0.396721307	0.001398325	0.116425565	Mettl17	protein-coding	Upregulated
ENSMUSG00000119991	72.33979461	-0.155651625	0.379440544	0.001417236	0.116991478			Downregulated
ENSMUSG00000024268	47.56052548	-2.031865277	1.067312945	0.001420177	0.116991478	Celf4	protein-coding	Downregulated
ENSMUSG00000029206	37.885596	-2.450622248	1.443172547	0.001426376	0.117088408	Nsun7	protein-coding	Downregulated
ENSMUSG00000014932	93.03791335	-0.153772154	0.378452299	0.001436956	0.117542974	Yes1	protein-coding	Downregulated
ENSMUSG00000110702	22.26667679	-0.250626944	0.486795276	0.001448464	0.11765868			Downregulated
ENSMUSG00000034664	3392.400114	1.508389496	0.809408415	0.001459731	0.118162193	Itga2b	protein-coding	Upregulated
ENSMUSG00000033192	62.71227138	1.750632742	1.003347091	0.001516217	0.121431523	Lpcat2	protein-coding	Upregulated
ENSMUSG00000024208	183.995923	1.772926818	0.977398619	0.001526163	0.121431523	Uqcc2	protein-coding	Upregulated
ENSMUSG00000033082	160.8214412	-1.815916051	1.105902249	0.001549096	0.122578884	Clec1a	protein-coding	Downregulated
ENSMUSG00000036989	155.3085907	-0.196557259	0.415794514	0.001556357	0.122578884	Trim3	protein-coding	Downregulated
ENSMUSG00000022474	262.9395426	1.647396021	0.967411229	0.001567784	0.122915256	Pmm1	protein-coding	Upregulated
ENSMUSG00000031139	56.3033434	2.127461773	1.521246137	0.001571173	0.122915256	Mcf2	protein-coding	Upregulated
ENSMUSG00000048142	460.1685909	0.158815856	0.383730993	0.001588559	0.123859763	Nat8l	protein-coding	Upregulated
ENSMUSG00000100210	1506.664407	1.707790482	1.236383055	0.001599743	0.124111572	H3c7	protein-coding	Upregulated
ENSMUSG00000044393	117.6112596	-1.960624126	1.270725254	0.001602436	0.124111572	Dsg2	protein-coding	Downregulated
ENSMUSG00000032531	303.8728005	-1.584496776	0.914681098	0.001620915	0.125046289	Amotl2	protein-coding	Downregulated
ENSMUSG00000020785	154.4552223	-1.99132009	1.279864636	0.001636487	0.125498132	Camkk1	protein-coding	Downregulated
ENSMUSG00000047959	625.1755875	1.273960099	0.625099376	0.001656844	0.126642599	Kcna3	protein-coding	Upregulated
ENSMUSG00000051285	652.5526942	-0.190257799	0.406260961	0.001686008	0.127761434	Pcmtd1	protein-coding	Downregulated
ENSMUSG00000026576	46.76509742	-0.275496767	0.516232825	0.001690905	0.127761434	Atp1b1	protein-coding	Downregulated
ENSMUSG00000057219	145.6809309	-1.724173606	1.188665483	0.001697993	0.127761434	Armc7	protein-coding	Downregulated
ENSMUSG00000023249	193.1253078	-1.760341909	1.33849828	0.001704039	0.127761434	Parp3	protein-coding	Downregulated
ENSMUSG00000119892	2995.8404	1.484428696	0.77720622	0.001726926	0.129037893	Gm23971	snRNA	Upregulated
ENSMUSG00000100927	10.79140726	-0.152924658	0.381124804	0.001792131	0.133482278			Downregulated
ENSMUSG00000001300	277.7996251	-2.071311714	1.233694209	0.00180813	0.133880872	Efnb2	protein-coding	Downregulated
ENSMUSG00000100788	10.60238932	0.157773579	0.385751148	0.001835691	0.134954174			Upregulated
ENSMUSG00000037419	533.813082	1.420800395	1.927929151	0.001840837	0.134954174	Endod1	protein-coding	Upregulated
ENSMUSG00000025716	22.13095561	-0.219692823	0.444284984	0.001850086	0.135207043	Myo3a	protein-coding	Downregulated
ENSMUSG00000052551	29.79367863	2.372942076	1.452146317	0.001867291	0.136038014	Adarb2	protein-coding	Upregulated
ENSMUSG00000024381	410.6819095	1.498280516	1.195696316	0.001896734	0.137752551	Bin1	protein-coding	Upregulated
ENSMUSG00000033460	203.1636431	-1.562247224	0.888036841	0.001931878	0.13986914	Armcx1	protein-coding	Downregulated
ENSMUSG00000017314	70.92609873	-0.181902616	0.400193321	0.001946922	0.140058264	Mpp2	protein-coding	Downregulated
ENSMUSG00000040084	857.1268874	1.708112198	1.182944244	0.001952513	0.140058264	Bub1b	protein-coding	Upregulated
ENSMUSG00000025510	216.8905294	-0.235334012	0.455759996	0.001985768	0.142006759	Cd151	protein-coding	Downregulated
ENSMUSG00000043059	127.1907187	-0.307224603	0.572582218	0.002000437	0.142618281	Zfp513	protein-coding	Downregulated
ENSMUSG00000058748	84.93167946	-0.241665987	0.468651109	0.002025324	0.143514856	Zfp958	protein-coding	Downregulated
ENSMUSG00000119668	2152.198493	1.520254236	0.854607312	0.002036283	0.143854165	Gm23472	snRNA	Upregulated
ENSMUSG00000061778	121.1967118	-0.404516813	0.840794168	0.002067116	0.145591172	Mospd2	protein-coding	Downregulated
ENSMUSG00000073599	24.5425865	-0.201528993	0.424387883	0.002080151	0.146067983	Ecscr	protein-coding	Downregulated
ENSMUSG00000067586	46.87744692	1.908805293	1.111029092	0.002091482	0.1464226	S1pr3	protein-coding	Upregulated
ENSMUSG00000033039	584.7355674	-0.311809986	0.571550691	0.002130723	0.148279242	Micall1	protein-coding	Downregulated
ENSMUSG00000061371	56.22800353	-1.740842408	1.02280182	0.002164631	0.149933883	Zfp873	protein-coding	Downregulated
ENSMUSG00000068036	641.5295277	-1.431272364	1.705249246	0.002167362	0.149933883	Afdn	protein-coding	Downregulated
ENSMUSG00000120876	40.78798968	-0.188311675	0.412332023	0.00221703	0.152916025			Downregulated
ENSMUSG00000101856	45.80727968	1.951592397	2.617968096	0.002229472	0.153320597	1700096K18Rik	ncRNA	Upregulated
ENSMUSG00000002108	16.62890825	-0.199029744	0.422663126	0.002243228	0.153812897	Nr1h3	protein-coding	Downregulated
ENSMUSG00000033565	715.2804974	-0.241199178	0.469183734	0.002256937	0.154299041	Rbfox2	protein-coding	Downregulated
ENSMUSG00000027684	1409.532962	-1.419236825	0.875500752	0.002289516	0.15540339	Mecom	protein-coding	Downregulated
ENSMUSG00000025277	47.52099328	-0.244903586	0.475600669	0.002293088	0.15540339	Abhd6	protein-coding	Downregulated
ENSMUSG00000031239	130.160104	-0.380521892	0.767586206	0.002366335	0.157950146	Itm2a	protein-coding	Downregulated
ENSMUSG00000028641	300.7847387	0.183382228	0.39880106	0.002377683	0.157950146	P3h1	protein-coding	Upregulated
ENSMUSG00000078768	92.11300022	-0.168511571	0.390491131	0.002382651	0.157950146	Zfp566	protein-coding	Downregulated
ENSMUSG00000119997	19.73419339	0.176483769	0.40071916	0.002390898	0.157950146	Gm31616	ncRNA	Upregulated
ENSMUSG00000068220	225.7292902	1.735844406	1.216117539	0.002391274	0.157950146	Lgals1	protein-coding	Upregulated
ENSMUSG00000004655	1380.476947	0.188743079	0.401903854	0.002414881	0.15827385	Aqp1	protein-coding	Upregulated
ENSMUSG00000017929	310.8797119	-0.333325827	0.622038109	0.002415705	0.15827385	B4galt5	protein-coding	Downregulated
ENSMUSG00000121064	93.41962448	-0.159467011	0.381223072	0.002421624	0.15827385			Downregulated
ENSMUSG00000062727	2041.189808	1.514205532	1.332953507	0.002433393	0.15827385	H2bc12	protein-coding	Upregulated
ENSMUSG00000036613	257.8868598	1.462029	1.108300205	0.002444959	0.15827385	Eipr1	protein-coding	Upregulated
ENSMUSG00000013973	313.9563241	1.431320675	0.850295654	0.002448887	0.15827385	Dedd	protein-coding	Upregulated
ENSMUSG00000039048	319.3537203	-0.318164725	0.581111954	0.002449023	0.15827385	Foxred1	protein-coding	Downregulated
ENSMUSG00000026383	118.2218122	-1.547573743	0.889876553	0.002450858	0.15827385	Epb41l5	protein-coding	Downregulated
ENSMUSG00000053819	336.3163644	-1.512131531	1.35024929	0.002477732	0.158440948	Camk2d	protein-coding	Downregulated
ENSMUSG00000035121	41.59215796	-0.153520996	0.378475009	0.002480631	0.158440948	Neil2	protein-coding	Downregulated
ENSMUSG00000029650	48.16004093	-2.072843143	1.415815412	0.002506783	0.159673868	Slc46a3	protein-coding	Downregulated
ENSMUSG00000031451	57.49413521	-0.23598122	0.455512668	0.002517258	0.159904157	Gas6	protein-coding	Downregulated
ENSMUSG00000038775	291.1156883	-0.423224369	0.878204658	0.002560334	0.161758967	Vill	protein-coding	Downregulated
ENSMUSG00000040314	78.8671113	0.207933699	0.430754566	0.002627515	0.164664697	Ctsg	protein-coding	Upregulated
ENSMUSG00000026080	137.5481589	-0.237904708	0.46540213	0.002685342	0.16648749	Chst10	protein-coding	Downregulated
ENSMUSG00000022580	20.03868638	-0.227196861	0.450963498	0.002702678	0.16648749	Rhpn1	protein-coding	Downregulated
ENSMUSG00000075054	203.2430886	-1.526782949	1.019912716	0.002702996	0.16648749	Yae1d1	protein-coding	Downregulated
ENSMUSG00000103509	76.72068953	-0.196484483	0.414129149	0.002706591	0.16648749			Downregulated
ENSMUSG00000027803	100.0737429	-0.171638303	0.390774516	0.002747888	0.16814046	Wwtr1	protein-coding	Downregulated
ENSMUSG00000047419	53.24577292	-1.682086635	1.18455931	0.002766155	0.168815082	Cmya5	protein-coding	Downregulated
ENSMUSG00000001323	236.9498204	1.400749436	1.441384357	0.002857691	0.173042479	Srr	protein-coding	Upregulated
ENSMUSG00000021013	82.97090483	-0.217893705	0.433516353	0.002873586	0.173554157	Ttc8	protein-coding	Downregulated
ENSMUSG00000046269	121.7782865	-1.737110743	1.432507639	0.002898892	0.17463015	Usp27x	protein-coding	Downregulated
ENSMUSG00000032513	164.4797651	-1.561948804	1.325620842	0.002911867	0.174959658	Gorasp1	protein-coding	Downregulated
ENSMUSG00000040690	794.7626886	-1.3652042	1.109460669	0.002966434	0.177324272	Col16a1	protein-coding	Downregulated
ENSMUSG00000032375	58.28436737	-0.192918173	0.411735952	0.002988168	0.177334166	Aph1b	protein-coding	Downregulated
ENSMUSG00000035840	427.4155528	-1.748444658	1.282446501	0.002997213	0.177334166	Lysmd3	protein-coding	Downregulated
ENSMUSG00000059336	1237.283713	1.66015274	1.465118043	0.003002389	0.177334166	Slc14a1	protein-coding	Upregulated
ENSMUSG00000020604	22.69044704	-0.164378004	0.389125337	0.003036097	0.178646222	Arsg	protein-coding	Downregulated
ENSMUSG00000039232	288.4676466	1.952448622	1.51767681	0.003042189	0.178646222	Stx11	protein-coding	Upregulated
ENSMUSG00000044674	410.8888612	0.29742228	0.543719481	0.003055555	0.178980305	Fzd1	protein-coding	Upregulated
ENSMUSG00000024107	122.9250284	-0.182960041	0.401725389	0.003067099	0.179206188	Lhcgr	protein-coding	Downregulated
ENSMUSG00000026879	433.6318531	1.335792671	0.828124485	0.003092992	0.180164652	Gsn	protein-coding	Upregulated
ENSMUSG00000030515	436.8141203	1.316517817	1.369126303	0.003106687	0.180164652	Tarsl2	protein-coding	Upregulated
ENSMUSG00000037833	31.02482974	-0.164345736	0.389354305	0.003134832	0.180896876	Sh2d4b	protein-coding	Downregulated
ENSMUSG00000020185	263.2881237	-0.300925973	0.543248102	0.003148385	0.181230378	E2f7	protein-coding	Downregulated
ENSMUSG00000033632	252.6091347	-1.24442793	0.735877144	0.003216243	0.184018344	AW554918	protein-coding	Downregulated
ENSMUSG00000026344	25.88862743	-0.188373964	0.408032976	0.003234471	0.184018344	Lypd1	protein-coding	Downregulated
ENSMUSG00000001062	286.9493818	-0.298968375	0.54641857	0.003235437	0.184018344	Vps9d1	protein-coding	Downregulated
ENSMUSG00000045095	120.444993	-1.41562832	1.490268167	0.003236285	0.184018344	Magi1	protein-coding	Downregulated
ENSMUSG00000034613	626.3644358	-1.277127017	0.811887077	0.0032462	0.184132996	Ppm1h	protein-coding	Downregulated
ENSMUSG00000037003	246.1849702	-0.290125554	0.533342881	0.003278125	0.185182614	Tns2	protein-coding	Downregulated
ENSMUSG00000037211	1211.790213	-1.301329804	0.88172245	0.00328073	0.185182614	Spry1	protein-coding	Downregulated
ENSMUSG00000120995	48.34770698	-0.188205077	0.40623788	0.00328899	0.185182614	Gm51425	protein-coding	Downregulated
ENSMUSG00000054453	44.71120728	-0.17094059	0.392290639	0.003296478	0.185182614	Sytl5	protein-coding	Downregulated
ENSMUSG00000038623	429.6473103	0.534048727	1.445667165	0.003318449	0.185968771	Tm6sf1	protein-coding	Upregulated
ENSMUSG00000066442	80.39528801	-0.318435895	0.596725346	0.003361965	0.187955618	Mthfs	protein-coding	Downregulated
ENSMUSG00000105304	115.7709125	2.102613047	2.006812158	0.003375106	0.188238872			Upregulated
ENSMUSG00000020925	405.6862543	0.21995415	0.433274191	0.003384328	0.18830269	Ccdc43	protein-coding	Upregulated
ENSMUSG00000025170	26.55118708	-0.210531352	0.429654714	0.003393501	0.188363567	Rab40b	protein-coding	Downregulated
ENSMUSG00000006095	234.4362789	0.289989663	0.53215073	0.003443348	0.189544231	Tbcb	protein-coding	Upregulated
ENSMUSG00000033965	58.21836818	-0.188120758	0.406001604	0.003463345	0.189544231	Slc16a2	protein-coding	Downregulated
ENSMUSG00000097078	33.97529949	0.238832652	0.464242383	0.003471685	0.189544231			Upregulated
ENSMUSG00000027796	30.33086687	-0.326611811	0.624748454	0.003500364	0.19021906	Smad9	protein-coding	Downregulated
ENSMUSG00000031004	7654.022693	1.180816473	0.755754748	0.003564722	0.192817555	Mki67	protein-coding	Upregulated
ENSMUSG00000103739	91.3837094	-0.156344281	0.379707165	0.003650887	0.195804705			Downregulated
ENSMUSG00000032827	1150.261132	-1.104039429	0.664196784	0.003655718	0.195804705	Ppp1r9a	protein-coding	Downregulated
ENSMUSG00000071855	235.4014139	-1.398438518	0.911122074	0.003658318	0.195804705	Ccdc112	protein-coding	Downregulated
ENSMUSG00000070063	122.4171148	1.419404379	0.935179455	0.003660726	0.195804705	Snora33	snoRNA	Upregulated
ENSMUSG00000056529	121.4955093	-0.21593672	0.434488284	0.003661942	0.195804705	Ptafr	protein-coding	Downregulated
ENSMUSG00000047875	147.0949201	-0.248363518	0.467319135	0.003702635	0.197307338	Gpr157	protein-coding	Downregulated
ENSMUSG00000050930	57.76214493	-0.202606084	0.418102737	0.003710114	0.197307338	Map10	protein-coding	Downregulated
ENSMUSG00000074063	318.672349	-0.160237728	0.382257801	0.003742707	0.198093582	Osgin1	protein-coding	Downregulated
ENSMUSG00000101939	61.10361473	-0.227872122	0.447125208	0.003747234	0.198093582			Downregulated
ENSMUSG00000025198	643.8494873	0.196666889	0.412053906	0.003775115	0.199115976	Erlin1	protein-coding	Upregulated
ENSMUSG00000023951	820.8224676	-1.179876496	0.835138109	0.003787933	0.199341055	Vegfa	protein-coding	Downregulated
ENSMUSG00000037762	76.5045179	-0.247422505	0.474697839	0.003807326	0.199777107	Slc16a9	protein-coding	Downregulated
ENSMUSG00000034584	70.0812493	-0.352957448	0.668602654	0.003820435	0.199777107	Exph5	protein-coding	Downregulated
ENSMUSG00000037022	51.51018944	-0.24385408	0.465370483	0.003821927	0.199777107	Mmaa	protein-coding	Downregulated
ENSMUSG00000069265	1285.489896	1.467255579	1.029302	0.003850476	0.200819126	H3c1	protein-coding	Upregulated
ENSMUSG00000118125	34.32849555	-0.198733818	0.418366705	0.003922522	0.204119965			Downregulated
ENSMUSG00000030217	709.3895059	-1.148018977	0.705452669	0.003983253	0.206359051	Art4	protein-coding	Downregulated
ENSMUSG00000038909	6764.293649	0.142635314	0.367273425	0.004023593	0.207986759	Kat7	protein-coding	Upregulated
ENSMUSG00000032547	106.6562705	-1.236875949	0.800461783	0.00405543	0.209037861	Ryk	protein-coding	Downregulated
ENSMUSG00000019689	101.8927169	0.167605904	0.389393494	0.004076528	0.209037861	Fmc1	protein-coding	Upregulated
ENSMUSG00000037325	24.4081616	-0.205734673	0.424417292	0.004079794	0.209037861	Bbs7	protein-coding	Downregulated
ENSMUSG00000061601	77.24105755	-0.303684127	0.550289788	0.004110869	0.209154013	Pclo	protein-coding	Downregulated
ENSMUSG00000036526	74.31091918	-0.318792683	0.578140048	0.004122731	0.209154013	Card11	protein-coding	Downregulated
ENSMUSG00000038212	395.8128115	1.28584375	1.206551889	0.004144861	0.209154013	Mfsd14b	protein-coding	Upregulated
ENSMUSG00000022451	368.7170214	-0.315041905	0.570509318	0.004160035	0.209466315	Twf1	protein-coding	Downregulated
ENSMUSG00000104388	159.9970794	-0.235171209	0.458895449	0.004183799	0.209971181			Downregulated
ENSMUSG00000030555	50.35677034	-0.307055547	0.575466093	0.004188075	0.209971181	Ttc23	protein-coding	Downregulated
ENSMUSG00000046341	243.9512084	0.462910868	1.005262886	0.004210014	0.210618134			Upregulated
ENSMUSG00000029710	173.9891343	-0.279079264	0.520484153	0.004240866	0.211660855	Ephb4	protein-coding	Downregulated
ENSMUSG00000032715	127.5218215	-0.161851651	0.385394065	0.004263429	0.211926058	Trib3	protein-coding	Downregulated
ENSMUSG00000103088	113.7157637	-1.228700113	1.363148486	0.004278203	0.212207996	Pcdhgb6	protein-coding	Downregulated
ENSMUSG00000063531	26.0361764	-0.245399622	0.470588634	0.004379257	0.216759294	Sema3e	protein-coding	Downregulated
ENSMUSG00000103885	34.88738495	-0.162437685	0.386105543	0.004397171	0.217184867			Downregulated
ENSMUSG00000005470	269.8431138	0.139750671	0.367572671	0.004441621	0.218045381	Asf1b	protein-coding	Upregulated
ENSMUSG00000021785	475.3058205	-1.195374671	0.892374188	0.004450573	0.218045381	Ngly1	protein-coding	Downregulated
ENSMUSG00000015846	464.9948913	0.293899362	0.532912884	0.004452005	0.218045381	Rxra	protein-coding	Upregulated
ENSMUSG00000028354	103.3955084	-0.252616126	0.4788565	0.004475487	0.218405189	Fmn2	protein-coding	Downregulated
ENSMUSG00000000753	342.5216524	-1.21042173	1.319526334	0.004495529	0.218786939	Serpinf1	protein-coding	Downregulated
ENSMUSG00000039084	87.73161531	-1.415700781	1.288067726	0.004504685	0.218786939	Chad	protein-coding	Downregulated
ENSMUSG00000046598	135.769941	-1.434864973	1.504660899	0.004526022	0.219366211	Bdh1	protein-coding	Downregulated
ENSMUSG00000058317	90.11014742	-0.227381766	0.445093962	0.004540105	0.219592236	Ube2e2	protein-coding	Downregulated
ENSMUSG00000044433	217.7417037	-1.189066719	1.068506734	0.004605344	0.222286504	Camsap3	protein-coding	Downregulated
ENSMUSG00000003438	431.7722054	0.502817067	1.200350351	0.004644035	0.222707845	Timm50	protein-coding	Upregulated
ENSMUSG00000069808	64.78740679	-0.191158016	0.409615782	0.004677018	0.223433052	Tlcd3a	protein-coding	Downregulated
ENSMUSG00000074340	25.83123832	-0.165495935	0.388462842	0.004691671	0.223674706	Ovgp1	protein-coding	Downregulated
ENSMUSG00000078439	238.6058861	1.093408571	0.707450887	0.004714969	0.224100149	Smim24	protein-coding	Upregulated
ENSMUSG00000063646	330.7452598	-0.344504215	0.616488277	0.004741785	0.224100149	Jakmip1	protein-coding	Downregulated
ENSMUSG00000049539	3397.722759	1.221529604	0.939911343	0.004772882	0.224100149	H1f1	protein-coding	Upregulated
ENSMUSG00000031077	361.2517204	1.232178082	0.968523781	0.004776677	0.224100149	Fadd	protein-coding	Upregulated
ENSMUSG00000060441	99.88951932	-0.210673506	0.424762124	0.004776695	0.224100149	Trim5	protein-coding	Downregulated
ENSMUSG00000072694	151.6891982	1.236360307	1.485031371	0.004777496	0.224100149	1500011B03Rik	ncRNA	Upregulated
ENSMUSG00000020020	32.03573264	-0.156961602	0.383009338	0.00479141	0.224301508	Usp44	protein-coding	Downregulated
ENSMUSG00000064262	364.2802629	-1.175743642	1.039855577	0.004833006	0.22541247	Gimap8	protein-coding	Downregulated
ENSMUSG00000030701	13.7574952	-0.166966304	0.391513728	0.00483448	0.22541247	Plekhb1	protein-coding	Downregulated
ENSMUSG00000020263	640.5216386	-1.228321774	1.199206253	0.004850206	0.225694322	Appl2	protein-coding	Downregulated
ENSMUSG00000005413	47.75787796	-0.155642301	0.378178896	0.004921725	0.228566068	Hmox1	protein-coding	Downregulated
ENSMUSG00000054659	90.35002878	-0.273021666	0.49943847	0.004967144	0.229304987	Pm20d2	protein-coding	Downregulated
ENSMUSG00000054519	48.61269644	-0.190769105	0.405186102	0.004992274	0.229577181	Zfp867	protein-coding	Downregulated
ENSMUSG00000048264	286.5160684	-1.143847894	1.084869867	0.005009173	0.229577181	Dip2c	protein-coding	Downregulated
ENSMUSG00000020330	550.2296268	1.120726629	3.331295919	0.005009917	0.229577181	Hmmr	protein-coding	Upregulated
ENSMUSG00000016493	55.59418785	-0.195152902	0.41140606	0.005021148	0.229577181	Cd46	protein-coding	Downregulated
ENSMUSG00000033157	168.6774195	-0.172583542	0.388531281	0.005042797	0.22961468	Abhd10	protein-coding	Downregulated
ENSMUSG00000039908	47.00725335	-0.177465581	0.396036946	0.005129437	0.232650897	Slc26a11	protein-coding	Downregulated
ENSMUSG00000026980	330.5811537	-0.465378908	1.026858716	0.005184704	0.234214173	Ly75	protein-coding	Downregulated
ENSMUSG00000026578	419.9518579	-1.104887082	1.011261541	0.005185373	0.234214173	Ccdc181	protein-coding	Downregulated
ENSMUSG00000121149	17.08190942	-0.191592744	0.41269762	0.005236515	0.234214173			Downregulated
ENSMUSG00000118423	289.4199597	-0.164742868	0.383261194	0.005262804	0.234214173	Lrrc70	protein-coding	Downregulated
ENSMUSG00000062861	166.991363	-0.536102924	1.784924372	0.005273722	0.234214173	Zfp28	protein-coding	Downregulated
ENSMUSG00000038305	16.49776605	-0.194623657	0.414777098	0.005278138	0.234214173	Spats2l	protein-coding	Downregulated
ENSMUSG00000082315	59.04682013	-0.159664925	0.380373929	0.005278887	0.234214173	Gm16523	pseudo	Downregulated
ENSMUSG00000026887	402.2196747	0.296809147	0.53867264	0.005279103	0.234214173	Mrrf	protein-coding	Upregulated
ENSMUSG00000003282	299.2881445	-0.215593174	0.430459138	0.005285237	0.234214173	Plag1	protein-coding	Downregulated
ENSMUSG00000084756	39.42506771	-0.192599021	0.411275817	0.005311014	0.234214173			Downregulated
ENSMUSG00000110386	76.66509096	0.171348291	0.386573698	0.005313118	0.234214173			Upregulated
ENSMUSG00000079165	95.53248555	-0.235000691	0.458779919	0.005341186	0.234341757	Sap25	protein-coding	Downregulated
ENSMUSG00000044854	160.8724877	0.140496449	0.365865167	0.005347686	0.234341757	1700056E22Rik	protein-coding	Upregulated
ENSMUSG00000075318	40.58311837	-0.412484696	0.848283773	0.005367756	0.234341757	Scn2a	protein-coding	Downregulated
ENSMUSG00000029765	166.9465178	-1.074812867	1.592376239	0.005394504	0.235069294	Plxna4	protein-coding	Downregulated
ENSMUSG00000033272	729.2078982	0.36414588	0.667789502	0.005469809	0.237729771	Slc35a4	protein-coding	Upregulated
ENSMUSG00000019945	39.07130205	-0.245893428	0.470729106	0.005475953	0.237729771	Cabcoco1	protein-coding	Downregulated
ENSMUSG00000055652	216.5879632	1.088923513	1.087176614	0.005538229	0.239429751	Klhl25	protein-coding	Upregulated
ENSMUSG00000020284	229.2349203	0.306810444	0.5687933	0.005560953	0.239429751	Cfap410	protein-coding	Upregulated
ENSMUSG00000042439	511.1564046	-1.069237547	0.922472088	0.00557034	0.239429751	Zfp532	protein-coding	Downregulated
ENSMUSG00000016356	39.09167797	-0.171922677	0.393319842	0.005573395	0.239429751	Col20a1	protein-coding	Downregulated
ENSMUSG00000038371	133.8828009	-1.181631569	0.943884087	0.005587598	0.239429751	Sbf2	protein-coding	Downregulated
ENSMUSG00000103039	30.89093996	-0.254860574	0.481482461	0.005593904	0.239429751			Downregulated
ENSMUSG00000058385	2193.225126	1.074212792	0.956089531	0.005597273	0.239429751	H2bc8	protein-coding	Upregulated
ENSMUSG00000029427	876.6314608	0.423216492	0.812151188	0.005608515	0.239471266	Zcchc8	protein-coding	Upregulated
ENSMUSG00000029221	806.8922419	1.077671954	0.910078099	0.005618939	0.239477738	Slc30a9	protein-coding	Upregulated
ENSMUSG00000029001	56.88240966	-0.295882498	0.552302196	0.005641476	0.239999491	Fbxo44	protein-coding	Downregulated
ENSMUSG00000084915	34.55418193	-0.178817214	0.397473873	0.005654126	0.240099545			Downregulated
ENSMUSG00000037820	2210.262868	-1.24376916	1.16254385	0.005745271	0.242395392	Tgm2	protein-coding	Downregulated
ENSMUSG00000046402	329.403209	-1.107918989	1.047256158	0.005766004	0.242640518	Rbp1	protein-coding	Downregulated
ENSMUSG00000078786	137.8844364	-0.281511044	0.511609922	0.005893912	0.246308875	Actmap	protein-coding	Downregulated
ENSMUSG00000034855	236.7687702	-0.267236807	0.491221401	0.005895438	0.246308875	Cxcl10	protein-coding	Downregulated
ENSMUSG00000072294	143.1008117	-0.261893562	0.484145674	0.005913757	0.246632215	Klf12	protein-coding	Downregulated
ENSMUSG00000060429	355.118338	0.264385143	0.493131049	0.006003306	0.248467873	Sntb1	protein-coding	Upregulated
ENSMUSG00000048388	32.37732649	-0.21719596	0.436534457	0.006005165	0.248467873	Fam171b	protein-coding	Downregulated
ENSMUSG00000038564	371.5882573	-0.988892611	1.586666105	0.006014059	0.248467873	Ift172	protein-coding	Downregulated
ENSMUSG00000108961	77.3873735	-0.252364652	0.472667194	0.00603026	0.248467873			Downregulated
ENSMUSG00000022840	55.06832833	-0.328264094	0.598879833	0.006032377	0.248467873	Adcy5	protein-coding	Downregulated
ENSMUSG00000030881	352.0583002	0.21835319	0.428713765	0.006057264	0.248561273	Arfip2	protein-coding	Upregulated
ENSMUSG00000075031	1108.217572	0.402632586	0.817182812	0.006065652	0.248561273	H2bc3	protein-coding	Upregulated
ENSMUSG00000103065	16.35674443	-0.183605712	0.405591348	0.006088721	0.248561273			Downregulated
ENSMUSG00000056888	510.3433572	0.542330685	1.256096681	0.006104939	0.248561273	Glipr1	protein-coding	Upregulated
ENSMUSG00000118751	14903.17359	1.09379116	0.907918073	0.006107371	0.248561273	Gm22634	snRNA	Upregulated
ENSMUSG00000091514	16.77590183	-0.162468001	0.387642027	0.006111289	0.248561273	Gm17484	ncRNA	Downregulated
ENSMUSG00000067377	67.4330066	-1.193912459	1.714910065	0.006143749	0.248561273	Tspan6	protein-coding	Downregulated
ENSMUSG00000052889	61.22517229	-1.15848746	1.490774246	0.006146073	0.248561273	Prkcb	protein-coding	Downregulated
ENSMUSG00000002578	110.7141181	-1.117921638	0.998891233	0.006154327	0.248561273	Ikzf4	protein-coding	Downregulated
ENSMUSG00000015647	184.2422932	-0.483040153	1.032880767	0.006182754	0.248561273	Lama5	protein-coding	Downregulated
ENSMUSG00000033220	2274.358876	0.95543019	1.398560823	0.006183649	0.248561273	Rac2	protein-coding	Upregulated
ENSMUSG00000054072	230.9580639	-0.201383037	0.412395766	0.006183912	0.248561273	Iigp1	protein-coding	Downregulated
ENSMUSG00000025484	181.3906783	1.072094359	1.111385401	0.006206952	0.248871128	Bet1l	protein-coding	Upregulated
ENSMUSG00000046605	170.1472741	-0.234084246	0.452330026	0.006212971	0.248871128	B3gntl1	protein-coding	Downregulated
ENSMUSG00000049044	53.93232468	-0.33531859	0.625772744	0.00625938	0.249532699	Rapgef4	protein-coding	Downregulated
ENSMUSG00000021276	242.6043076	0.184061844	0.402826228	0.006260361	0.249532699	Cinp	protein-coding	Upregulated
ENSMUSG00000087305	42.33710783	-0.152876616	0.379290394	0.006265513	0.249532699	A430035B10Rik	ncRNA	Downregulated
ENSMUSG00000024043	142.2027608	-0.30348724	0.538452562	0.006320336	0.250399593	Arhgap28	protein-coding	Downregulated
ENSMUSG00000019124	91.52755302	-1.168148136	1.243592232	0.006326314	0.250399593	Scrn1	protein-coding	Downregulated
ENSMUSG00000031310	847.2064393	0.385680714	0.710865785	0.006381323	0.251586414	Zmym3	protein-coding	Upregulated
ENSMUSG00000030844	152.5037181	0.235542003	0.457469401	0.006386401	0.251586414	Rgs10	protein-coding	Upregulated
ENSMUSG00000102543	102.0653941	-1.000366992	2.716544851	0.00639183	0.251586414	Pcdhgc5	protein-coding	Downregulated
ENSMUSG00000084925	23.75670557	1.196669643	4.308582044	0.006435346	0.252285085	1810062O18Rik	ncRNA	Upregulated
ENSMUSG00000037313	355.1832515	1.095466059	1.104244084	0.006507688	0.254553232	Tacc3	protein-coding	Upregulated
ENSMUSG00000116220	65.94409051	0.181238915	0.402689427	0.006575767	0.255562228	A430088P11Rik	ncRNA	Upregulated
ENSMUSG00000068115	60.71313702	-0.294558462	0.544945163	0.006626481	0.256616532	Ninl	protein-coding	Downregulated
ENSMUSG00000026199	343.7017169	0.865168653	1.637827098	0.006654293	0.257266234	Ankzf1	protein-coding	Upregulated
ENSMUSG00000029468	92.16223259	-0.154328951	0.375958021	0.006681276	0.257881763	P2rx7	protein-coding	Downregulated
ENSMUSG00000045094	18.53897096	0.222162327	0.442225773	0.006778776	0.261212581	Arhgef37	protein-coding	Upregulated
ENSMUSG00000023505	307.0180724	0.239147151	0.461439551	0.006817341	0.262265132	Cdca3	protein-coding	Upregulated
ENSMUSG00000032175	592.4740661	0.24732978	0.460362122	0.006862344	0.263128008	Tyk2	protein-coding	Upregulated
ENSMUSG00000065649	421.843786	0.990249331	0.708109652	0.006915651	0.26387	Snora74a	snoRNA	Upregulated
ENSMUSG00000028246	50.71123439	-0.362494373	0.67801742	0.006956708	0.264024986	Faxc	protein-coding	Downregulated
ENSMUSG00000063954	2203.128151	0.344807951	0.627335524	0.007002758	0.26500453	H2ac19	protein-coding	Upregulated
ENSMUSG00000031523	193.5444278	-0.285155334	0.515154576	0.007013589	0.26500453	Dlc1	protein-coding	Downregulated
ENSMUSG00000040651	543.6536076	-0.272369883	0.496345132	0.007027399	0.26509669	Tasor	protein-coding	Downregulated
ENSMUSG00000051527	17.56760441	-0.176941955	0.396918982	0.007074871	0.266316668	Usp29	protein-coding	Downregulated
ENSMUSG00000020649	299.1721012	0.989512105	0.931935197	0.007098571	0.266332731	Rrm2	protein-coding	Upregulated
ENSMUSG00000030107	54.43197636	-0.235860235	0.4525422	0.007105862	0.266332731	Usp18	protein-coding	Downregulated
ENSMUSG00000033306	763.8227107	-0.493945125	1.096154435	0.007122937	0.266544185	Lpp	protein-coding	Downregulated
ENSMUSG00000120298	61.35531392	-0.181505742	0.397991368	0.007153953	0.267275798			Downregulated
ENSMUSG00000008307	149.1889915	-0.165380586	0.38389085	0.007210514	0.268528288	1700109H08Rik	protein-coding	Downregulated
ENSMUSG00000017210	1114.315108	0.931109078	0.690711389	0.007242567	0.269014397	Med24	protein-coding	Upregulated
ENSMUSG00000033149	117.840811	-0.944643355	1.445509921	0.007250272	0.269014397	Phldb2	protein-coding	Downregulated
ENSMUSG00000036158	154.1551621	-0.218338965	0.427860683	0.007274614	0.269014397	Prickle1	protein-coding	Downregulated
ENSMUSG00000030681	844.6637942	-0.963061705	0.833605425	0.007293003	0.269014397	Mvp	protein-coding	Downregulated
ENSMUSG00000022543	69.21120665	-0.316516161	0.581034241	0.007304342	0.269014397	Dnaaf8	protein-coding	Downregulated
ENSMUSG00000110020	55.63246768	0.280701848	0.517285475	0.007319017	0.269129705			Upregulated
ENSMUSG00000042874	23.60024505	0.172652784	0.392298143	0.007340305	0.269487441			Upregulated
ENSMUSG00000110949	105.1462794	-0.157146582	0.376673631	0.007419068	0.270942637	Nudt8	protein-coding	Downregulated
ENSMUSG00000002984	498.3595372	0.413618225	0.773779259	0.007426429	0.270942637	Tomm40	protein-coding	Upregulated
ENSMUSG00000030871	152.5553528	-0.981827326	0.999143148	0.007492663	0.272081704	Ears2	protein-coding	Downregulated
ENSMUSG00000085396	1048.002006	-0.377641114	0.692345885	0.007522768	0.27223861	Firre	ncRNA	Downregulated
ENSMUSG00000039419	15.87828804	-0.194253838	0.414015456	0.00753225	0.27223861	Cntnap2	protein-coding	Downregulated
ENSMUSG00000001663	64.89712076	-0.209266618	0.428268475	0.007533293	0.27223861	Gstt1	protein-coding	Downregulated
ENSMUSG00000044352	52.46769312	-0.333253476	0.618658266	0.007543694	0.27223861	Sowaha	protein-coding	Downregulated
ENSMUSG00000112007	40.85696231	0.154253807	0.380728105	0.00756807	0.272401386	Gm18119	pseudo	Upregulated
ENSMUSG00000057572	210.9363178	-0.228231586	0.439980449	0.007591326	0.272401386	Zbtb8os	protein-coding	Downregulated
ENSMUSG00000089854	23.06738659	-0.225039707	0.445484397	0.007594943	0.272401386			Downregulated
ENSMUSG00000037020	356.9018052	0.247036487	0.466792878	0.007677352	0.27475407	Wdr62	protein-coding	Upregulated
ENSMUSG00000024924	702.4043849	-0.23789374	0.447148441	0.00772654	0.27475407	Vldlr	protein-coding	Downregulated
ENSMUSG00000061126	30.79708503	0.171188415	0.389659182	0.007750614	0.27475407	Cyp4f39	protein-coding	Upregulated
ENSMUSG00000035095	121.0508808	-0.237868804	0.456258171	0.007782233	0.27475407	Fam167a	protein-coding	Downregulated
ENSMUSG00000097559	29.73039429	0.152212707	0.376367238	0.007817394	0.27475407			Upregulated
ENSMUSG00000097993	117.3190915	-0.321676356	0.568617219	0.007826878	0.27475407	Ptprv	protein-coding	Downregulated
ENSMUSG00000035142	88.19806898	-0.276512457	0.502176434	0.007841686	0.27475407	Nubpl	protein-coding	Downregulated
ENSMUSG00000072915	61.48077264	-0.207223813	0.426023695	0.007848913	0.27475407	Gm12258	protein-coding	Downregulated
ENSMUSG00000066026	256.2574713	0.848753144	1.88320695	0.007919736	0.27475407	Dhrs3	protein-coding	Upregulated
ENSMUSG00000051499	70.86994177	0.151548632	0.374710853	0.007936929	0.27475407	Zfp786	protein-coding	Upregulated
ENSMUSG00000110366	88.74553047	-1.046700432	1.265707677	0.007941897	0.27475407			Downregulated
ENSMUSG00000060470	1116.156033	0.954541443	1.117354696	0.007957094	0.27478769	Adgrg3	protein-coding	Upregulated
ENSMUSG00000025785	382.1448184	0.188591498	0.400142876	0.007985602	0.27478769	Exosc7	protein-coding	Upregulated
ENSMUSG00000047907	26.89631156	-0.293696202	0.535125025	0.007985817	0.27478769	Tshz2	protein-coding	Downregulated
ENSMUSG00000087266	11.94698321	-0.182876148	0.403146114	0.007991509	0.27478769			Downregulated
ENSMUSG00000041272	210.4029653	-0.208549503	0.417866159	0.008085767	0.277264612	Tox	protein-coding	Downregulated
ENSMUSG00000103900	16.53123166	-0.190072798	0.409279572	0.008105667	0.277485174	Gm37500	protein-coding	Downregulated
ENSMUSG00000041319	224.6894315	0.19221615	0.403121966	0.008142602	0.277999635	Thoc6	protein-coding	Upregulated
ENSMUSG00000047881	152.4756895	-0.96553742	0.817242114	0.008144544	0.277999635	Rell1	protein-coding	Downregulated
ENSMUSG00000028517	40.17534811	-0.244772601	0.460884504	0.008180702	0.278554239	Plpp3	protein-coding	Downregulated
ENSMUSG00000105728	117.4683933	-0.163883662	0.383404681	0.008246087	0.280218789			Downregulated
ENSMUSG00000030513	32.76190171	0.188351656	0.405621363	0.008257638	0.280218789	Pcsk6	protein-coding	Upregulated
ENSMUSG00000020212	194.7440017	0.370561438	0.670309349	0.008279825	0.280563309	Mdm1	protein-coding	Upregulated
ENSMUSG00000112990	12.96032963	-0.199017272	0.417184863	0.008339819	0.281777111			Downregulated
ENSMUSG00000028454	246.6378976	0.861287383	1.622590515	0.008387603	0.282932079	Pigo	protein-coding	Upregulated
ENSMUSG00000070822	163.392264	-0.197178846	0.410850851	0.008398276	0.282932079	Zscan18	protein-coding	Downregulated
ENSMUSG00000020781	302.606627	0.23467619	0.446383558	0.008421214	0.283049454	Tsen54	protein-coding	Upregulated
ENSMUSG00000032221	763.5649451	0.188199644	0.397213053	0.008426042	0.283049454	Mns1	protein-coding	Upregulated
ENSMUSG00000029581	496.4339887	-0.173481586	0.391538444	0.008455595	0.283225997	Fscn1	protein-coding	Downregulated
ENSMUSG00000016206	148.1274382	-0.204812151	0.417471687	0.008474323	0.283446042	H2-M3	protein-coding	Downregulated
ENSMUSG00000026798	91.04311414	0.944970428	1.362366208	0.008498747	0.283551211	Coq4	protein-coding	Upregulated
ENSMUSG00000035458	42.3890395	-0.160566207	0.383815117	0.008501793	0.283551211	Tnni3	protein-coding	Downregulated
ENSMUSG00000108912	35.20344933	-0.241790309	0.462105472	0.008533153	0.283785166			Downregulated
ENSMUSG00000013419	53.09225319	-0.202091715	0.420319082	0.008545982	0.283806948	Zfp651	protein-coding	Downregulated
ENSMUSG00000024620	715.4315903	0.568799341	1.151784754	0.008669174	0.287488545	Pdgfrb	protein-coding	Upregulated
ENSMUSG00000102657	21.82160119	-0.193222423	0.411634468	0.008705801	0.288293087			Downregulated
ENSMUSG00000034173	98.68740419	-0.274811528	0.501918925	0.008775708	0.289483008	Zbed5	protein-coding	Downregulated
ENSMUSG00000120984	110.0611255	-0.154409076	0.378027373	0.008776215	0.289483008			Downregulated
ENSMUSG00000047250	664.8895734	-0.398211403	0.739306375	0.008791403	0.289483008	Ptgs1	protein-coding	Downregulated
ENSMUSG00000018800	96.57379461	-0.254715829	0.47118175	0.008921097	0.292514106	Abca5	protein-coding	Downregulated
ENSMUSG00000053460	98.69366978	-0.324342281	0.585215187	0.008953535	0.292634966	Ggcx	protein-coding	Downregulated
ENSMUSG00000118559	40.32788052	-0.262675343	0.482928246	0.00896244	0.292634966	A930007A09Rik	protein-coding	Downregulated
ENSMUSG00000034675	178.9447143	0.907198577	1.252451807	0.008994643	0.29312034	Dbn1	protein-coding	Upregulated
ENSMUSG00000024059	26.08183088	-0.184640204	0.401389015	0.009002452	0.29312034	Clip4	protein-coding	Downregulated
ENSMUSG00000030551	29.46346803	-0.303605145	0.558215933	0.009026018	0.293477781	Nr2f2	protein-coding	Downregulated
ENSMUSG00000073274	308.1559538	-0.880443253	1.545258553	0.009078891	0.294278642			Downregulated
ENSMUSG00000052605	92.02836375	0.169807461	0.389744241	0.009172322	0.295542548	Isoc2b	protein-coding	Upregulated
ENSMUSG00000024186	49.76119624	0.496987629	1.193925519	0.009178261	0.295542548	Rgs11	protein-coding	Upregulated
ENSMUSG00000036155	2182.655491	0.835057009	1.104285193	0.009270583	0.296613771	Mgat5	protein-coding	Upregulated
ENSMUSG00000100747	42.78381001	-0.483154943	1.071986893	0.009275144	0.296613771			Downregulated
ENSMUSG00000000058	142.2780305	-0.880978961	1.220736631	0.009442335	0.298806016	Cav2	protein-coding	Downregulated
ENSMUSG00000048416	53.22739975	-0.204450958	0.41536663	0.009448167	0.298806016	Mlf1	protein-coding	Downregulated
ENSMUSG00000036114	58.03104571	0.214216172	0.427188262	0.009486427	0.298806016	Rpp25l	protein-coding	Upregulated
ENSMUSG00000032374	133.2065546	-0.270722662	0.487425864	0.009492883	0.298806016	Plod2	protein-coding	Downregulated
ENSMUSG00000035173	553.430031	0.196166365	0.404156236	0.009529661	0.298806016	Ccdc186	protein-coding	Upregulated
ENSMUSG00000032845	23.42705965	-0.18186315	0.400993318	0.009530558	0.298806016	Alpk2	protein-coding	Downregulated
ENSMUSG00000054855	53.63134582	-0.157301895	0.377557002	0.00954877	0.298806016	Rnd1	protein-coding	Downregulated
ENSMUSG00000038702	136.0280497	-0.213405148	0.42326897	0.009587689	0.299220608	Dsel	protein-coding	Downregulated
ENSMUSG00000040606	118.3480197	-0.305319061	0.544999074	0.009668042	0.300922634	Kazn	protein-coding	Downregulated
ENSMUSG00000029999	38.37328653	-0.43392765	0.882912492	0.009695535	0.300974696	Tgfa	protein-coding	Downregulated
ENSMUSG00000073771	98.91091964	-0.92997331	1.0103819	0.009740876	0.301980111	Btbd19	protein-coding	Downregulated
ENSMUSG00000117055	43.17668322	-0.3301142	0.597914361	0.009762245	0.302240648			Downregulated
ENSMUSG00000019082	287.7944201	0.360387484	0.644914947	0.009844009	0.303604032	Slc25a22	protein-coding	Upregulated
ENSMUSG00000045053	46.14031734	0.17012868	0.387638083	0.009863779	0.303604032	Kcng3	protein-coding	Upregulated
ENSMUSG00000114456	511.5803945	0.449877091	0.943038183	0.009869534	0.303604032	H2bc9	protein-coding	Upregulated
ENSMUSG00000019894	253.3720687	-0.291550651	0.535361779	0.009871396	0.303604032	Slc6a15	protein-coding	Downregulated
ENSMUSG00000029009	254.6304171	-0.326038468	0.571530057	0.009902538	0.303817163	Mthfr	protein-coding	Downregulated
ENSMUSG00000024529	29.92201193	-0.20712222	0.425665673	0.009920415	0.303817163	Lox	protein-coding	Downregulated
ENSMUSG00000086003	25.08201687	0.188334969	0.404966118	0.009955874	0.303817163	B230206L02Rik	ncRNA	Upregulated
ENSMUSG00000029625	396.7093953	0.830490294	1.092120872	0.009958327	0.303817163	Cpsf4	protein-coding	Upregulated
ENSMUSG00000045284	96.78278603	-0.25887533	0.478716546	0.009964129	0.303817163	Dcaf12l1	protein-coding	Downregulated
ENSMUSG00000000037	109.1994082	-0.906167993	0.933814091	0.010010609	0.303906397	Scml2	protein-coding	Downregulated
ENSMUSG00000022186	1690.855243	0.793118914	0.66914221	0.010016298	0.303906397	Oxct1	protein-coding	Upregulated
ENSMUSG00000045725	55.50248948	-0.581800607	1.447422778	0.010024622	0.303906397	Prr15	protein-coding	Downregulated
ENSMUSG00000035914	55.2663671	-0.157302117	0.379547569	0.010119116	0.3063663	Cd276	protein-coding	Downregulated
ENSMUSG00000085037	108.1518055	-0.719701286	1.531617962	0.010177209	0.306577896	4933421O10Rik	ncRNA	Downregulated
ENSMUSG00000047344	73.97256303	-0.166080242	0.386161642	0.010178497	0.306577896	Lancl3	protein-coding	Downregulated
ENSMUSG00000032548	57.20728366	-0.164688396	0.38157275	0.010197548	0.306673765	Slco2a1	protein-coding	Downregulated
ENSMUSG00000055128	124.2448513	-0.183247548	0.397471569	0.010215078	0.306673765	Cgrrf1	protein-coding	Downregulated
ENSMUSG00000023960	252.9967126	-0.217283831	0.425982019	0.010230156	0.306673765	Enpp5	protein-coding	Downregulated
ENSMUSG00000116069	94.44093881	-0.289455421	0.520021628	0.010271757	0.306912272			Downregulated
ENSMUSG00000037134	303.9890667	0.845081629	0.673976858	0.010280589	0.306912272	Prmt9	protein-coding	Upregulated
ENSMUSG00000027314	78.33217313	-0.162974133	0.382014196	0.010281752	0.306912272	Dll4	protein-coding	Downregulated
ENSMUSG00000051435	45.34334514	0.177385929	0.393436324	0.010328126	0.307509056	Fhad1	protein-coding	Upregulated
ENSMUSG00000002076	24.06030406	0.157352873	0.381051861	0.010345824	0.307643094	Hsf2bp	protein-coding	Upregulated
ENSMUSG00000004558	227.0789857	-0.754337279	1.836920144	0.010403139	0.308560287	Ndrg2	protein-coding	Downregulated
ENSMUSG00000038665	24.52705567	-0.157909	0.380272147	0.010477772	0.30947112	Dgki	protein-coding	Downregulated
ENSMUSG00000032235	320.1290306	-0.463887594	0.927688807	0.01059007	0.309835887	Ice2	protein-coding	Downregulated
ENSMUSG00000022610	40.5789327	-0.171073625	0.387110913	0.010618986	0.309835887	Mapk12	protein-coding	Downregulated
ENSMUSG00000050373	39.35185917	-0.258051122	0.477338849	0.01062657	0.309835887	Snx21	protein-coding	Downregulated
ENSMUSG00000018547	892.7273957	-0.809074535	1.004604929	0.010683354	0.310306801	Pip4k2b	protein-coding	Downregulated
ENSMUSG00000057880	39.41087927	-0.219002567	0.429368398	0.010688301	0.310306801	Abat	protein-coding	Downregulated
ENSMUSG00000000392	26.64020948	-0.175467945	0.395125188	0.010743688	0.311139869	Fap	protein-coding	Downregulated
ENSMUSG00000062101	78.7790879	-0.171831819	0.392991346	0.010827804	0.311390996	Zfp119b	protein-coding	Downregulated
ENSMUSG00000058881	931.0160098	-0.560086606	1.241559368	0.01083406	0.311390996	Zfp516	protein-coding	Downregulated
ENSMUSG00000047844	161.146851	-0.236471098	0.45134474	0.010851679	0.311390996	Bex4	protein-coding	Downregulated
ENSMUSG00000097589	372.16385	0.827007153	1.004687566	0.010859215	0.311390996	Dleu2	ncRNA	Upregulated
ENSMUSG00000085828	43.76878505	0.162756922	0.384863904	0.010909962	0.312461841	Gm15612	ncRNA	Upregulated
ENSMUSG00000063681	23.54634507	-0.196403533	0.41206331	0.010970727	0.313136415	Crb1	protein-coding	Downregulated
ENSMUSG00000038807	61.52460755	-0.194158218	0.407996347	0.010981161	0.313136415	Rap1gap2	protein-coding	Downregulated
ENSMUSG00000031074	500.5834037	0.311382393	0.53976763	0.010983362	0.313136415	Fgf3	protein-coding	Upregulated
ENSMUSG00000025395	387.3961104	0.478989439	1.016067649	0.010987243	0.313136415	Prim1	protein-coding	Upregulated
ENSMUSG00000064284	42.42743132	-0.161743991	0.379619536	0.011008028	0.313345748	Cdpf1	protein-coding	Downregulated
ENSMUSG00000037940	141.8891977	-0.857249619	0.994679826	0.011023789	0.313404947	Inpp4b	protein-coding	Downregulated
ENSMUSG00000028896	520.9593235	0.250501586	0.461655347	0.01105027	0.313404947	Rcc1	protein-coding	Upregulated
ENSMUSG00000030084	682.4510638	-0.453537908	0.887107764	0.011063701	0.313404947	Plxna1	protein-coding	Downregulated
ENSMUSG00000023972	355.418549	-0.285745728	0.50739687	0.011063882	0.313404947	Ptk7	protein-coding	Downregulated
ENSMUSG00000021338	108.4162148	-0.628444087	1.44298882	0.011132889	0.314595206	Carmil1	protein-coding	Downregulated
ENSMUSG00000031548	83.2627172	-0.278412451	0.507060571	0.01115504	0.314839517	Sfrp1	protein-coding	Downregulated
ENSMUSG00000086477	79.12659793	0.822939557	1.236820963	0.01120367	0.315448262			Upregulated
ENSMUSG00000106205	92.46870442	-0.383786264	0.681661563	0.011302709	0.316817368			Downregulated
ENSMUSG00000099375	130.8160267	-0.215787868	0.429654097	0.011336439	0.317270593			Downregulated
ENSMUSG00000020140	106.1387078	-0.157967972	0.377048967	0.011371322	0.317798661	Lgr5	protein-coding	Downregulated
ENSMUSG00000040097	586.3433385	-0.421518755	0.739501289	0.011392859	0.317798661	Flywch1	protein-coding	Downregulated
ENSMUSG00000043929	294.8381456	0.40760748	0.731190854	0.011421893	0.317798661	Klhl15	protein-coding	Upregulated
ENSMUSG00000120784	510.897867	0.399905904	0.706115509	0.011501611	0.317798661			Upregulated
ENSMUSG00000041912	203.5071766	-0.3109122	0.558166541	0.011514984	0.317798661	Tdrkh	protein-coding	Downregulated
ENSMUSG00000033590	230.3501027	-0.800104339	1.468037156	0.01153126	0.317798661	Myo5c	protein-coding	Downregulated
ENSMUSG00000014294	207.8644838	0.269525497	0.492825687	0.011550575	0.317798661	Ndufa2	protein-coding	Upregulated
ENSMUSG00000047953	211.1309717	0.245359549	0.461952577	0.011578019	0.317798661	Gp5	protein-coding	Upregulated
ENSMUSG00000034789	208.1604796	-0.424702222	0.756382212	0.011616019	0.318170311	Rab24	protein-coding	Downregulated
ENSMUSG00000050052	84.95721002	-0.29448204	0.527439386	0.011627895	0.318170311	Tdrp	protein-coding	Downregulated
ENSMUSG00000026014	118.8318587	-0.208554375	0.419755586	0.011708109	0.318653541	Raph1	protein-coding	Downregulated
ENSMUSG00000025857	307.8732753	0.336544203	0.584554963	0.011711778	0.318653541	Dnaaf5	protein-coding	Upregulated
ENSMUSG00000036904	246.3008534	-0.731461328	1.451877639	0.011762803	0.3192389	Fzd8	protein-coding	Downregulated
ENSMUSG00000022419	624.043277	0.792382301	0.852466051	0.011780309	0.319320597	Deptor	protein-coding	Upregulated
ENSMUSG00000052085	3829.563103	0.622379502	1.166662234	0.011847149	0.31990116	Dock8	protein-coding	Upregulated
ENSMUSG00000063021	2728.619231	0.906870098	0.852651135	0.011876015	0.31990116	H2ac15	protein-coding	Upregulated
ENSMUSG00000035575	1651.549439	0.147691852	0.367777746	0.011890321	0.31990116	Utp6	protein-coding	Upregulated
ENSMUSG00000038116	712.6294031	-0.483630422	0.892528071	0.011923926	0.31990116	Phf20	protein-coding	Downregulated
ENSMUSG00000071661	17.7504708	-0.177613149	0.39729228	0.011928209	0.31990116	Zbtb3	protein-coding	Downregulated
ENSMUSG00000050890	308.4105568	0.197220777	0.409704457	0.011964485	0.31990116	Pdik1l	protein-coding	Upregulated
ENSMUSG00000020778	98.11259554	-0.779831971	1.169557642	0.011981262	0.31990116	Ten1	protein-coding	Downregulated
ENSMUSG00000024726	735.8975292	0.157953104	0.373933272	0.012023552	0.31990116	Carnmt1	protein-coding	Upregulated
ENSMUSG00000023066	224.7412743	-0.542074336	1.111602241	0.012027631	0.31990116	Rttn	protein-coding	Downregulated
ENSMUSG00000000365	51.33799344	-0.168261428	0.386303957	0.012033048	0.31990116	Rnf17	protein-coding	Downregulated
ENSMUSG00000097268	37.26778108	0.252554552	0.476193592	0.012044425	0.31990116			Upregulated
ENSMUSG00000044502	117.0653169	-0.243356929	0.45090577	0.012052003	0.31990116	Bod1	protein-coding	Downregulated
ENSMUSG00000071531	34.74783167	-0.152597903	0.375794003	0.012074493	0.31990116	Gprin2	protein-coding	Downregulated
ENSMUSG00000104063	58.05140919	-0.1782966	0.391437841	0.012079102	0.31990116	Pcdhgb7	protein-coding	Downregulated
ENSMUSG00000097287	176.1818262	-0.26099359	0.480249621	0.012107698	0.31990116			Downregulated
ENSMUSG00000025529	33.99586017	-0.289899349	0.52296227	0.012164569	0.31990116	Zfp711	protein-coding	Downregulated
ENSMUSG00000033256	104.2830358	0.22449542	0.434484724	0.012194747	0.31990116	Shf	protein-coding	Upregulated
ENSMUSG00000118671	61.80606443	-0.16056994	0.377986659	0.012231446	0.31990116			Downregulated
ENSMUSG00000106795	18.19207799	0.222136876	0.437898664	0.012250226	0.31990116	Gm5563	ncRNA	Upregulated
ENSMUSG00000112592	47.29356557	-0.308047191	0.555401107	0.012251307	0.31990116			Downregulated
ENSMUSG00000033769	966.6637946	-0.613947004	1.160395577	0.012270675	0.31990116	Exoc6b	protein-coding	Downregulated
ENSMUSG00000000489	244.6713328	-0.285698956	0.511397365	0.012284925	0.31990116	Pdgfb	protein-coding	Downregulated
ENSMUSG00000024944	162.2566628	-0.255972898	0.46478406	0.012297447	0.31990116	Arl2	protein-coding	Downregulated
ENSMUSG00000098234	195.8197315	0.255621857	0.466509388	0.012307183	0.31990116	Snhg6	ncRNA	Upregulated
ENSMUSG00000014980	119.4040471	-0.25307462	0.471394468	0.012309636	0.31990116	Tsen15	protein-coding	Downregulated
ENSMUSG00000071748	41.01316257	-0.219886466	0.431168841	0.012322363	0.31990116	Styx-ps	pseudo	Downregulated
ENSMUSG00000015971	280.8151195	-0.81837426	0.768148164	0.012340616	0.320018662	Actr8	protein-coding	Downregulated
ENSMUSG00000034845	96.06305475	0.223337012	0.435239328	0.012398828	0.320490792	Plvap	protein-coding	Upregulated
ENSMUSG00000019850	5787.149765	0.747548566	0.557415338	0.012457042	0.321147472	Tnfaip3	protein-coding	Upregulated
ENSMUSG00000095687	462.3580707	0.784122216	0.678734593	0.012490043	0.321147472	Rnaset2a	protein-coding	Upregulated
ENSMUSG00000054612	88.32238194	-0.210335	0.418630111	0.012549023	0.321962394	Mgmt	protein-coding	Downregulated
ENSMUSG00000032261	36.77375609	-0.350702871	0.628546036	0.012694894	0.323024415	Sh3bgrl2	protein-coding	Downregulated
ENSMUSG00000121235	28.59049114	0.2213095	0.435577372	0.012699215	0.323024415			Upregulated
ENSMUSG00000047910	68.28631959	-0.176061832	0.391549448	0.012716517	0.323024415	Pcdhb16	protein-coding	Downregulated
ENSMUSG00000004347	91.38734922	-0.212365941	0.419754265	0.012717604	0.323024415	Pde1c	protein-coding	Downregulated
ENSMUSG00000068696	69.29845151	-0.193952547	0.40564065	0.012767717	0.323536728	Gpr88	protein-coding	Downregulated
ENSMUSG00000009535	442.8495054	0.782502327	0.894901786	0.012817075	0.323629836	Rnmt	protein-coding	Upregulated
ENSMUSG00000000708	676.6435598	0.42050239	0.785453525	0.012865757	0.324258809	Kat2b	protein-coding	Upregulated
ENSMUSG00000114755	45.05449152	-0.258110849	0.471585968	0.012936431	0.325336588	Galr3	protein-coding	Downregulated
ENSMUSG00000055172	197.3233085	-0.310947153	0.547481456	0.012961724	0.325338144	C1ra	protein-coding	Downregulated
ENSMUSG00000022827	127.9724239	0.166854667	0.382649575	0.012964403	0.325338144	Rabl3	protein-coding	Upregulated
ENSMUSG00000017978	338.8336729	-0.321910169	0.561637332	0.013014157	0.325522646	Cadps2	protein-coding	Downregulated
ENSMUSG00000114999	28.68374049	0.271652903	0.494545586	0.013023816	0.325522646			Upregulated
ENSMUSG00000022358	220.3020922	-0.582216476	1.041375901	0.013042837	0.325522646	Fbxo32	protein-coding	Downregulated
ENSMUSG00000022901	45.62008948	-0.162022141	0.380245499	0.013056535	0.325522646	Cd86	protein-coding	Downregulated
ENSMUSG00002075745	2264.691273	0.692893782	1.131973145	0.01305867	0.325522646			Upregulated
ENSMUSG00000079083	109.192839	-0.173296684	0.388111563	0.013069498	0.325522646	Jrkl	protein-coding	Downregulated
ENSMUSG00000004996	394.0661343	0.212432049	0.419956245	0.013193255	0.325966553	Mri1	protein-coding	Upregulated
ENSMUSG00000044072	78.80149625	-0.56681263	1.128002709	0.013219222	0.325966553	Eml6	protein-coding	Downregulated
ENSMUSG00000004071	302.9240835	-0.377428899	0.64746751	0.013231301	0.325966553	Cdip1	protein-coding	Downregulated
ENSMUSG00000097743	51.7073735	-0.157968408	0.376444322	0.013245363	0.325966553	Gm16973	ncRNA	Downregulated
ENSMUSG00000038497	135.6421902	-0.551586421	1.173488817	0.013257392	0.325966553	Tmco3	protein-coding	Downregulated
ENSMUSG00000028621	174.1102627	0.186581512	0.400215326	0.01326239	0.325966553	Cyb5rl	protein-coding	Upregulated
ENSMUSG00000022820	108.0762589	0.1423421	0.368726099	0.013269236	0.325966553	Ndufb4	protein-coding	Upregulated
ENSMUSG00000028195	390.3214411	-0.320180466	0.546157129	0.013283071	0.325966553	Ccn1	protein-coding	Downregulated
ENSMUSG00000038180	342.891435	0.144837754	0.368113637	0.013305028	0.326162047	Spag4	protein-coding	Upregulated
ENSMUSG00000039801	558.4908228	-0.204169402	0.414628767	0.013406496	0.327070568	Cplane1	protein-coding	Downregulated
ENSMUSG00000118936	1612.145108	0.405992479	0.706904957	0.013418331	0.327070568	Gm22614	snRNA	Upregulated
ENSMUSG00000006154	217.8259896	-0.181824213	0.391904326	0.013481448	0.327550183	Eps8l1	protein-coding	Downregulated
ENSMUSG00000040936	50.4615824	-0.377682064	0.676714621	0.01351892	0.32795689	Ulk4	protein-coding	Downregulated
ENSMUSG00000009350	4356.780318	0.492193318	0.967744837	0.01359669	0.329154323	Mpo	protein-coding	Upregulated
ENSMUSG00000026339	514.458931	-0.506504764	0.939652065	0.013633795	0.329372717	Ccdc93	protein-coding	Downregulated
ENSMUSG00000041298	217.6087922	-0.252161781	0.456903344	0.013757629	0.330341581	Katnal1	protein-coding	Downregulated
ENSMUSG00000026037	454.8508811	0.358184612	0.635406012	0.013773089	0.330341581	Orc2	protein-coding	Upregulated
ENSMUSG00000038080	185.9630544	0.40975331	0.728027105	0.013820861	0.330806699	Kdm1b	protein-coding	Upregulated
ENSMUSG00000020914	2999.261449	0.263698586	0.47897181	0.01386666	0.331127283	Top2a	protein-coding	Upregulated
ENSMUSG00000037339	397.227363	-0.751861038	0.784017059	0.013876865	0.331127283	Fam53a	protein-coding	Downregulated
ENSMUSG00000090386	157.3003219	-0.662903032	1.110114233	0.013928385	0.332016801	Mir99ahg	ncRNA	Downregulated
ENSMUSG00000026709	550.6935323	0.168294847	0.384404459	0.013969011	0.33264511	Dars2	protein-coding	Upregulated
ENSMUSG00000025867	272.1260122	-0.265605553	0.482952889	0.014130272	0.336122834	Cplx2	protein-coding	Downregulated
ENSMUSG00000046410	94.1431781	-0.333379792	0.572518001	0.01416792	0.336326976	Kcnk6	protein-coding	Downregulated
ENSMUSG00000030409	55.98692027	-0.174996905	0.389022758	0.014210186	0.336326976	Dmpk	protein-coding	Downregulated
ENSMUSG00000036769	243.8500418	-0.712572062	0.96060694	0.014272107	0.33646444	Wdr44	protein-coding	Downregulated
ENSMUSG00000025006	260.509617	-0.324974263	0.567393005	0.014286708	0.33646444	Sorbs1	protein-coding	Downregulated
ENSMUSG00000037355	479.6257872	-0.432893816	0.745878711	0.01431757	0.33646444	Uvssa	protein-coding	Downregulated
ENSMUSG00000069270	1873.043157	0.63084582	1.052632365	0.014399793	0.337389325	H2ac6	protein-coding	Upregulated
ENSMUSG00000024610	787.9262618	-0.743921393	0.748640351	0.014482311	0.337553501	Cd74	protein-coding	Downregulated
ENSMUSG00000068744	152.2951561	0.168131274	0.38336665	0.014493675	0.337553501	Psrc1	protein-coding	Upregulated
ENSMUSG00000078954	16.14322818	-0.158006726	0.382097124	0.014568611	0.338744763	Arhgap8	protein-coding	Downregulated
ENSMUSG00000062797	166.6200102	0.647003707	1.035385198	0.014597177	0.338948185	Hikeshi	protein-coding	Upregulated
ENSMUSG00000072969	187.4799235	-0.455571112	0.830514508	0.014679838	0.339244108	Armcx5	protein-coding	Downregulated
ENSMUSG00000054690	78.06405855	-0.209048941	0.42002978	0.01472785	0.33995086	Emcn	protein-coding	Downregulated
ENSMUSG00000113361	20.58451158	-0.167704572	0.386236327	0.014790697	0.340914905			Downregulated
ENSMUSG00000032702	31.05747377	-0.234699809	0.449472539	0.014828109	0.340914905	Kank1	protein-coding	Downregulated
ENSMUSG00000041037	420.8140225	0.678978997	0.879565994	0.014866269	0.341119408	Irgq	protein-coding	Upregulated
ENSMUSG00000027597	1367.546627	0.703372314	0.740141101	0.014901656	0.34159519	Ahcy	protein-coding	Upregulated
ENSMUSG00000097411	41.13753173	0.238829136	0.450504857	0.014955208	0.342486016			Upregulated
ENSMUSG00000019822	217.0357939	-0.59186753	1.037883465	0.014975211	0.3425409	Smpd2	protein-coding	Downregulated
ENSMUSG00000041241	479.4894644	-0.718502923	0.994724949	0.015026913	0.3425409	Mul1	protein-coding	Downregulated
ENSMUSG00000032786	504.6020755	0.406438126	0.7247112	0.015044779	0.3425409	Alas1	protein-coding	Upregulated
ENSMUSG00000097709	39.14278921	0.214019608	0.424008349	0.015089056	0.3425409	2810429I04Rik	ncRNA	Upregulated
ENSMUSG00000111496	52.79848222	-0.361674067	0.635463972	0.015104908	0.3425409			Downregulated
ENSMUSG00000081179	34.20977967	0.195277602	0.40729601	0.015134568	0.3425409			Upregulated
ENSMUSG00000052926	391.3512915	0.222224645	0.429401982	0.015138915	0.3425409	Rnaseh2a	protein-coding	Upregulated
ENSMUSG00000073016	104.6223276	0.240199249	0.448671372	0.015144106	0.3425409	Uprt	protein-coding	Upregulated
ENSMUSG00000047143	73.58254166	0.40407588	0.735364665	0.015148615	0.3425409	Dmrta2	protein-coding	Upregulated
ENSMUSG00000038286	178.7832456	0.245722414	0.451456169	0.01519594	0.343230418	Bphl	protein-coding	Upregulated
ENSMUSG00000023009	356.6658502	-0.575578425	0.968569125	0.015268844	0.343230418	Nckap5l	protein-coding	Downregulated
ENSMUSG00000038936	106.4238298	-0.249941637	0.455827905	0.015289825	0.343230418	Sccpdh	protein-coding	Downregulated
ENSMUSG00000036223	92.88037628	0.22130445	0.433087397	0.015329302	0.343259524	Ska1	protein-coding	Upregulated
ENSMUSG00000097328	46.253345	-0.159328476	0.382524457	0.015342359	0.343259524	Tnfsf12	protein-coding	Downregulated
ENSMUSG00000020319	110.9777691	0.205695993	0.414371286	0.015377623	0.343390549	Wdpcp	protein-coding	Upregulated
ENSMUSG00000074071	69.80493075	-0.24060178	0.455013928	0.015419338	0.343991411	Fam169b	protein-coding	Downregulated
ENSMUSG00000037152	72.35691683	-0.157731635	0.376449258	0.015465863	0.344361709	Ndufc1	protein-coding	Downregulated
ENSMUSG00000000791	121.9226716	-0.27438743	0.494401904	0.015492379	0.344361709	Il12rb1	protein-coding	Downregulated
ENSMUSG00000022951	203.2210674	0.164362082	0.379351491	0.015530491	0.344361709	Rcan1	protein-coding	Upregulated
ENSMUSG00000052769	34.54318221	-0.181153081	0.393476479	0.01553117	0.344361709			Downregulated
ENSMUSG00000119765	36.14487038	0.161024083	0.380876756	0.015545732	0.344361709	Gm23136	snoRNA	Upregulated
ENSMUSG00000029012	181.1114894	-0.245604387	0.451241707	0.015554106	0.344361709	Orc5	protein-coding	Downregulated
ENSMUSG00000037752	46.34784079	-0.183584484	0.398932721	0.015651283	0.345896039	Xkr8	protein-coding	Downregulated
ENSMUSG00000026035	227.927013	0.169952487	0.38885481	0.015661976	0.345896039	Ppil3	protein-coding	Upregulated
ENSMUSG00000045165	319.4734994	0.336888159	0.572892367	0.01566792	0.345896039	AI467606	protein-coding	Upregulated
ENSMUSG00000020283	798.5264736	0.193249739	0.400896073	0.015845434	0.347838611	Pex13	protein-coding	Upregulated
ENSMUSG00000022034	78.31584627	0.260293788	0.474738337	0.015921231	0.348982872	Esco2	protein-coding	Upregulated
ENSMUSG00000013878	215.226497	0.174710753	0.38507919	0.015927499	0.348982872	Rnf170	protein-coding	Upregulated
ENSMUSG00000016252	389.0789247	0.67195167	0.889702433	0.015968404	0.349550613	Atp5e	protein-coding	Upregulated
ENSMUSG00000067787	199.2853097	-0.162823966	0.378082009	0.01600388	0.349998556	Blcap	protein-coding	Downregulated
ENSMUSG00000028560	1621.737299	0.552579866	0.985107083	0.016095823	0.351679393	Usp1	protein-coding	Upregulated
ENSMUSG00000031425	40.61201971	-0.165993349	0.38647781	0.016131315	0.351808194	Plp1	protein-coding	Downregulated
ENSMUSG00000043421	76.31704923	0.207824118	0.417102879	0.016155151	0.351808194	Hilpda	protein-coding	Upregulated
ENSMUSG00000080717	75.32156435	-0.152734815	0.373538664	0.016202975	0.351808194	B230307C23Rik	protein-coding	Downregulated
ENSMUSG00000039043	30.3830572	-0.196372875	0.408045082	0.01623203	0.351808194	Arpin	protein-coding	Downregulated
ENSMUSG00000021779	47.42023569	-0.177938591	0.390796375	0.01627398	0.351943688	Thrb	protein-coding	Downregulated
ENSMUSG00000034930	216.0224365	-0.188761303	0.400295622	0.016348581	0.353229342	Rtkn	protein-coding	Downregulated
ENSMUSG00000021066	56.13980088	-0.256226555	0.472274944	0.016383908	0.353337703	Atl1	protein-coding	Downregulated
ENSMUSG00000014791	88.89606435	-0.229823552	0.442500916	0.016434968	0.354111283	Elmo3	protein-coding	Downregulated
ENSMUSG00000023942	344.0744593	0.216779664	0.420834644	0.016486496	0.354893512	Slc29a1	protein-coding	Upregulated
ENSMUSG00000038515	42.12089961	0.193131499	0.406449163	0.016541038	0.355739134	Grtp1	protein-coding	Upregulated
ENSMUSG00000028464	76.27580064	-0.167914649	0.381464056	0.016571301	0.356061519	Tpm2	protein-coding	Downregulated
ENSMUSG00000042216	252.7174541	-0.322720012	0.563437565	0.016599392	0.356336681	Sgsm1	protein-coding	Downregulated
ENSMUSG00000041609	301.5483636	-0.225795727	0.437679515	0.016692906	0.358014454	Bicdl1	protein-coding	Downregulated
ENSMUSG00000052565	6339.465615	0.695087781	0.644802622	0.016731559	0.358170593	H1f3	protein-coding	Upregulated
ENSMUSG00000040274	11589.52335	0.329473424	0.556350366	0.016746277	0.358170593	Cdk6	protein-coding	Upregulated
ENSMUSG00000048481	56.19672229	0.141358023	0.367016735	0.01698124	0.362199135	Mypop	protein-coding	Upregulated
ENSMUSG00000017764	134.814799	0.151306667	0.372113379	0.017032206	0.362441283	Zswim1	protein-coding	Upregulated
ENSMUSG00000026171	173.7089843	-0.235098934	0.442761692	0.017034747	0.362441283	Rnf25	protein-coding	Downregulated
ENSMUSG00000022946	738.1182164	-0.698421249	0.714964037	0.017039233	0.362441283	Dop1b	protein-coding	Downregulated
ENSMUSG00000029005	50.78037147	0.161685635	0.383644496	0.017115738	0.363247075	Draxin	protein-coding	Upregulated
ENSMUSG00000111312	36.8853725	0.151679289	0.373541257	0.017164845	0.363247075			Upregulated
ENSMUSG00000034663	868.5058309	0.674906961	0.806879521	0.017166528	0.363247075	Bmp2k	protein-coding	Upregulated
ENSMUSG00000000711	339.9197641	-0.182198741	0.390820547	0.01718392	0.363247075	Rab5b	protein-coding	Downregulated
ENSMUSG00000026750	466.420606	0.692630061	0.852602812	0.017196289	0.363247075	Psmb7	protein-coding	Upregulated
ENSMUSG00000052271	49.53957905	-0.231752938	0.441164533	0.01724861	0.363577613	Bhlha15	protein-coding	Downregulated
ENSMUSG00000029840	2166.415791	0.19643496	0.404230095	0.017487481	0.366953775	Mtpn	protein-coding	Upregulated
ENSMUSG00000021638	93.06126363	-0.166847066	0.386195109	0.017581115	0.367666907	Ocln	protein-coding	Downregulated
ENSMUSG00000024273	61.20202185	0.243809001	0.4573917	0.017601501	0.367666907	2700062C07Rik	protein-coding	Upregulated
ENSMUSG00000027204	79.26428703	-0.276970183	0.490485599	0.017670346	0.367666907	Fbn1	protein-coding	Downregulated
ENSMUSG00000021835	46.14301645	-0.275924664	0.491934071	0.017685951	0.367666907	Bmp4	protein-coding	Downregulated
ENSMUSG00000027463	36.76825467	-0.247795171	0.457433319	0.01769413	0.367666907	Slc52a3	protein-coding	Downregulated
ENSMUSG00000042462	376.6453669	0.223977626	0.429306859	0.017710717	0.367666907	Dctpp1	protein-coding	Upregulated
ENSMUSG00000041957	30.6301196	-0.176681272	0.394257974	0.017750074	0.368156127	Pkp2	protein-coding	Downregulated
ENSMUSG00000049532	359.7300615	-0.401993311	0.68396848	0.017786536	0.368584467	Sall2	protein-coding	Downregulated
ENSMUSG00000022898	122.3804322	0.370164103	0.644935401	0.017816459	0.368876657	Vps26c	protein-coding	Upregulated
ENSMUSG00000004698	240.0748725	-0.306078356	0.52439773	0.017911082	0.369302546	Hdac9	protein-coding	Downregulated
ENSMUSG00000067916	312.6658278	-0.267985284	0.476409341	0.017914929	0.369302546	Zfp991	protein-coding	Downregulated
ENSMUSG00000032238	653.2112864	-0.283248598	0.505091873	0.018091016	0.370717239	Rora	protein-coding	Downregulated
ENSMUSG00000047246	1166.712976	0.587501282	0.873224333	0.018129086	0.37106531	H2bc6	protein-coding	Upregulated
ENSMUSG00000050471	185.3788477	0.166639125	0.380188646	0.018347234	0.373889042	Fam118b	protein-coding	Upregulated
ENSMUSG00000015094	325.7298276	-0.282312091	0.507235267	0.018442528	0.37459357	Npdc1	protein-coding	Downregulated
ENSMUSG00000026670	577.4024681	0.664924687	0.59129113	0.018456511	0.37459357	Uap1	protein-coding	Upregulated
ENSMUSG00000024737	22.07644822	-0.186238194	0.400535534	0.018485747	0.37459357	Slc15a3	protein-coding	Downregulated
ENSMUSG00000032690	215.0655897	0.214579648	0.418620857	0.018494282	0.37459357	Oas2	protein-coding	Upregulated
ENSMUSG00000022070	607.613373	0.309785785	0.537270302	0.018560645	0.375008049	Bora	protein-coding	Upregulated
ENSMUSG00000022372	704.933492	0.462452837	0.774144341	0.018563003	0.375008049	Sla	protein-coding	Upregulated
ENSMUSG00000036208	282.3919158	0.62048919	0.855543905	0.018585483	0.375137112	Nepro	protein-coding	Upregulated
ENSMUSG00000050530	496.8160723	-0.428867935	0.7143658	0.018644535	0.375678516	Fam171a1	protein-coding	Downregulated
ENSMUSG00000020544	74.69388407	0.21655797	0.426774007	0.018685879	0.375934957	Cox11	protein-coding	Upregulated
ENSMUSG00000022176	131.5675589	0.191023159	0.399695233	0.018756212	0.375934957	Rem2	protein-coding	Upregulated
ENSMUSG00000043587	154.2490724	-0.610439161	0.890067255	0.018759283	0.375934957	Pxylp1	protein-coding	Downregulated
ENSMUSG00000071064	187.6025613	-0.498357661	0.831196772	0.01877196	0.375934957	Zfp827	protein-coding	Downregulated
ENSMUSG00000038213	191.9264482	-0.4736944	0.777979483	0.018871589	0.37656323	Tapbpl	protein-coding	Downregulated
ENSMUSG00000025453	484.8170832	-0.388368009	0.67012493	0.018892857	0.37656323	Nnt	protein-coding	Downregulated
ENSMUSG00000053411	255.6379722	-0.419906273	0.694228607	0.018898425	0.37656323	Cbx7	protein-coding	Downregulated
ENSMUSG00000039620	32.69159165	-0.224285306	0.433247224	0.018929236	0.376855069	Trmt9b	protein-coding	Downregulated
ENSMUSG00000017801	217.1288114	0.15270457	0.374485227	0.018968581	0.377316158	Mlx	protein-coding	Upregulated
ENSMUSG00000025757	713.900602	0.655251102	0.736383151	0.019165906	0.37914845	Hspa4l	protein-coding	Upregulated
ENSMUSG00000031227	113.3784896	-0.27856141	0.49309731	0.019177586	0.37914845	Magee1	protein-coding	Downregulated
ENSMUSG00000058174	58.14785202	-0.358813114	0.618999223	0.019188494	0.37914845	Gm5148	protein-coding	Downregulated
ENSMUSG00000118100	61.44196612	0.163255707	0.381616309	0.019195587	0.37914845	Gm50340	ncRNA	Upregulated
ENSMUSG00000052676	103.9296025	-0.186361532	0.39842114	0.019224872	0.37914845	Zmat1	protein-coding	Downregulated
ENSMUSG00000039738	494.5508734	-0.280836558	0.488825157	0.019304913	0.37914845	Slx4	protein-coding	Downregulated
ENSMUSG00000117869	2719.558999	0.663372032	0.662267472	0.019312008	0.37914845	Snhg4	ncRNA	Upregulated
ENSMUSG00000059921	33.10072607	-0.161492576	0.379755816	0.019358969	0.37914845	Unc5c	protein-coding	Downregulated
ENSMUSG00000064829	31.61104193	0.158588052	0.378922251	0.019375627	0.37914845	Gm22879	snoRNA	Upregulated
ENSMUSG00000021809	114.7771677	-0.169285191	0.381608403	0.019382355	0.37914845	Nudt13	protein-coding	Downregulated
ENSMUSG00000097974	66.7322633	0.191758109	0.407406868	0.019410426	0.37914845			Upregulated
ENSMUSG00000104960	391.4437156	-0.224173937	0.427703916	0.019510908	0.380315889	Snhg8	ncRNA	Downregulated
ENSMUSG00000052496	21.72921802	-0.242802019	0.456775714	0.019531028	0.380390031	Pkdrej	protein-coding	Downregulated
ENSMUSG00000054312	173.2717959	0.557385217	0.859182452	0.019586559	0.380612555	Mrps21	protein-coding	Upregulated
ENSMUSG00000035171	182.9788822	0.175736852	0.38879432	0.019591432	0.380612555	1110059E24Rik	protein-coding	Upregulated
ENSMUSG00000107061	504.0784966	-0.234756772	0.438910486	0.019801302	0.383139313			Downregulated
ENSMUSG00000024304	27.94202756	-0.172052735	0.391570949	0.019901174	0.384094912	Cdh2	protein-coding	Downregulated
ENSMUSG00000108173	46.21083902	-0.178689452	0.393963949	0.019902486	0.384094912			Downregulated
ENSMUSG00000016624	69.45602509	-0.271210328	0.481879652	0.02003987	0.386339875	Phf21b	protein-coding	Downregulated
ENSMUSG00000070639	1253.288294	0.240673009	0.440188194	0.020071197	0.386391252	Lrrc8b	protein-coding	Upregulated
ENSMUSG00000026211	583.5519971	-0.543421431	0.830623857	0.020112818	0.38665164	Obsl1	protein-coding	Downregulated
ENSMUSG00000074622	31.82541507	-0.214564495	0.423201058	0.020117893	0.38665164	Mafb	protein-coding	Downregulated
ENSMUSG00000105970	68.19933515	-0.218602745	0.42773958	0.020159935	0.386806317			Downregulated
ENSMUSG00000027628	199.2492649	-0.479597646	0.820822861	0.020181042	0.386806317	Aar2	protein-coding	Downregulated
ENSMUSG00000030598	44.9325182	-0.312551888	0.541565711	0.020196715	0.386806317	Fbxo17	protein-coding	Downregulated
ENSMUSG00000023094	132.4353672	-0.492185959	0.808197313	0.020229204	0.386852214	Msrb2	protein-coding	Downregulated
ENSMUSG00000031399	134.2783937	-0.360125773	0.621291222	0.020254128	0.386852214	Fam3a	protein-coding	Downregulated
ENSMUSG00002075453	2609.042871	0.387324799	0.67753344	0.02026108	0.386852214			Upregulated
ENSMUSG00000022489	205.9770221	-0.240367557	0.44567397	0.020329516	0.38747494	Pde1b	protein-coding	Downregulated
ENSMUSG00000058446	1086.880725	0.28327766	0.490961285	0.020401956	0.38747494	Znrf2	protein-coding	Upregulated
ENSMUSG00000021476	135.6392225	-0.206319538	0.410715222	0.020404749	0.38747494	Habp4	protein-coding	Downregulated
ENSMUSG00000021068	2376.753284	0.216275867	0.417469347	0.020431057	0.38747494	Nin	protein-coding	Upregulated
ENSMUSG00000069268	248.2239579	0.141680855	0.366664194	0.020455135	0.38747494	H2bc7	protein-coding	Upregulated
ENSMUSG00000040289	57.53654121	-0.166989877	0.383455321	0.020463446	0.38747494	Hey1	protein-coding	Downregulated
ENSMUSG00000058056	192.3971971	-0.23295361	0.441145195	0.020503452	0.38747494	Palld	protein-coding	Downregulated
ENSMUSG00000024371	92.41468446	-0.283232356	0.497364862	0.020508948	0.38747494	C2	protein-coding	Downregulated
ENSMUSG00000032840	78.20742513	-0.194893396	0.402717427	0.020526159	0.38747494	Spring1	protein-coding	Downregulated
ENSMUSG00000031109	188.5236241	-0.227908957	0.430219192	0.02065833	0.389335211	Enox2	protein-coding	Downregulated
ENSMUSG00000018334	1079.815333	0.139921291	0.361373656	0.02069707	0.389750239	Ksr1	protein-coding	Upregulated
ENSMUSG00000108614	29.42520212	-0.156572497	0.378937236	0.020740176	0.389932041			Downregulated
ENSMUSG00000120006	39.05229563	-0.256778878	0.467323407	0.02076812	0.390142777			Downregulated
ENSMUSG00000031668	457.0973119	-0.534942503	0.767943016	0.020870884	0.390664309	Eif2ak3	protein-coding	Downregulated
ENSMUSG00000095432	177.907092	-0.291046274	0.498687223	0.020884344	0.390664309	Zfp748	protein-coding	Downregulated
ENSMUSG00000097354	97.71204234	-0.227060721	0.432645124	0.020910879	0.390664309	2310001H17Rik	ncRNA	Downregulated
ENSMUSG00000030043	11.74537952	-0.1523912	0.376772474	0.020913741	0.390664309	Tacr1	protein-coding	Downregulated
ENSMUSG00000051224	131.8997718	-0.244537271	0.447543312	0.020919106	0.390664309	Tceanc	protein-coding	Downregulated
ENSMUSG00000029701	676.6938629	0.613310764	0.629255162	0.020946699	0.390664309	Rbm28	protein-coding	Upregulated
ENSMUSG00000019027	144.7100988	-0.230103986	0.431455889	0.021004587	0.3914308	Dnah1	protein-coding	Downregulated
ENSMUSG00000057411	211.760001	0.219079899	0.422695849	0.021082528	0.391598548	Antkmt	protein-coding	Upregulated
ENSMUSG00000055629	109.7140309	-0.529192858	0.868567948	0.021082665	0.391598548	B4galnt4	protein-coding	Downregulated
ENSMUSG00000040774	297.2300414	0.237959403	0.438302212	0.021104487	0.391598548	Cept1	protein-coding	Upregulated
ENSMUSG00000060090	218.5908626	-0.241021569	0.444816993	0.021150318	0.391932436	Rp2	protein-coding	Downregulated
ENSMUSG00000046768	226.2148996	-0.222515559	0.435106482	0.021165999	0.391932436	Rhoj	protein-coding	Downregulated
ENSMUSG00000038156	26.28099019	-0.209341918	0.420422933	0.021209061	0.39217917	Spon1	protein-coding	Downregulated
ENSMUSG00000025702	283.5571371	-0.244285432	0.446455804	0.02121363	0.39217917	Marchf8	protein-coding	Downregulated
ENSMUSG00000024423	323.6962426	-0.354812219	0.584704102	0.021261078	0.392446177	Impact	protein-coding	Downregulated
ENSMUSG00000033327	58.71002439	-0.34774205	0.596897441	0.021317192	0.393071922	Tnxb	protein-coding	Downregulated
ENSMUSG00000083365	38939.02382	0.429801569	0.698883016	0.021345561	0.393071922			Upregulated
ENSMUSG00000119012	1720.114215	0.466376575	0.760868889	0.021383501	0.393289702	Gm24312	rRNA	Upregulated
ENSMUSG00000046658	488.6505448	-0.317185945	0.528526171	0.021518077	0.394654343	Zfp316	protein-coding	Downregulated
ENSMUSG00000106831	68.36615155	0.141830697	0.368985862	0.021569851	0.394654343			Upregulated
ENSMUSG00000000088	351.9515967	0.571653812	0.772961986	0.021599537	0.394654343	Cox5a	protein-coding	Upregulated
ENSMUSG00000090516	34.91799075	-0.164324554	0.381991962	0.021613957	0.394654343	Rps11-ps1	pseudo	Downregulated
ENSMUSG00000111521	21.63560978	-0.159582302	0.379437661	0.021620108	0.394654343			Downregulated
ENSMUSG00000078350	55.47399493	-0.190023306	0.401142748	0.021650368	0.394654343	Smim1	protein-coding	Downregulated
ENSMUSG00000030706	308.2399265	0.46160256	0.753640693	0.021651564	0.394654343	Mrpl48	protein-coding	Upregulated
ENSMUSG00000020737	672.406264	0.608910568	0.80035608	0.021775571	0.395657214	Jpt1	protein-coding	Upregulated
ENSMUSG00000034755	87.21051075	0.157545966	0.379870099	0.021784451	0.395657214	Pcdh11x	protein-coding	Upregulated
ENSMUSG00000031605	277.4384258	-0.320488406	0.541049833	0.021791441	0.395657214	Klhl2	protein-coding	Downregulated
ENSMUSG00000025495	258.3477519	0.309888153	0.530208737	0.021864497	0.396078347	Ptdss2	protein-coding	Upregulated
ENSMUSG00000028633	371.5036398	0.271197617	0.481281741	0.021873681	0.396078347	Ctps	protein-coding	Upregulated
ENSMUSG00000022533	1233.962546	0.521280997	0.846939703	0.021884443	0.396078347	Atp13a3	protein-coding	Upregulated
ENSMUSG00000036768	578.9683982	0.224560089	0.432855172	0.021896511	0.396078347	Kif15	protein-coding	Upregulated
ENSMUSG00000039485	187.6415899	-0.224542253	0.431782539	0.021945776	0.396606106	Tspyl4	protein-coding	Downregulated
ENSMUSG00000047361	183.6878364	-0.240886257	0.451385948	0.022043526	0.398064083	Gm973	protein-coding	Downregulated
ENSMUSG00000093445	879.5284302	0.60305994	0.677884329	0.022128067	0.399003226	Lrch4	protein-coding	Upregulated
ENSMUSG00000021306	23.92163709	-0.198946161	0.41076229	0.022181461	0.399003226	Gpr137b	protein-coding	Downregulated
ENSMUSG00000013698	624.1568333	0.14564525	0.366837909	0.022192186	0.399003226	Pea15a	protein-coding	Upregulated
ENSMUSG00000018347	214.6901963	-0.179171374	0.387319368	0.022198223	0.399003226	Zkscan6	protein-coding	Downregulated
ENSMUSG00000092609	72.81521752	-0.164398754	0.379055569	0.022293361	0.399762848			Downregulated
ENSMUSG00000031168	225.1212954	0.239585712	0.452360316	0.022299714	0.399762848	Ebp	protein-coding	Upregulated
ENSMUSG00000079429	61.43214331	-0.230670688	0.438229239	0.022309075	0.399762848	Mroh2a	protein-coding	Downregulated
ENSMUSG00000052512	487.3578978	-0.581859235	0.708103302	0.022366111	0.399817482	Nav2	protein-coding	Downregulated
ENSMUSG00000048376	2588.437082	0.567231202	0.780329355	0.022380724	0.399817482	F2r	protein-coding	Upregulated
ENSMUSG00000118859	207.1127754	0.183750056	0.397417963	0.022561899	0.401390352	Gm26316	snRNA	Upregulated
ENSMUSG00000038517	390.8500938	-0.299158657	0.524320984	0.022578107	0.401390352	Tbkbp1	protein-coding	Downregulated
ENSMUSG00000028334	782.6174793	0.586062419	0.717241845	0.022602568	0.401390352	Nans	protein-coding	Upregulated
ENSMUSG00000042549	52.54478277	0.205348811	0.411410912	0.022672033	0.401390352	Map2k3os	ncRNA	Upregulated
ENSMUSG00000085793	56.20360737	0.159363717	0.377042439	0.022675378	0.401390352	Lin52	protein-coding	Upregulated
ENSMUSG00000097150	39.65902565	0.146315551	0.37026327	0.022704053	0.40142724			Upregulated
ENSMUSG00000040838	24.9729003	-0.207344566	0.416433213	0.0227119	0.40142724			Downregulated
ENSMUSG00000026748	479.7098137	-0.23881368	0.442489499	0.022761462	0.401998461	Plxdc2	protein-coding	Downregulated
ENSMUSG00000069793	947.5808989	0.149268236	0.36726965	0.02303227	0.404673699	Slfn9	protein-coding	Upregulated
ENSMUSG00000018427	193.8457712	-0.24937326	0.456670327	0.023034444	0.404673699	Ypel2	protein-coding	Downregulated
ENSMUSG00000051149	1544.626412	0.203956156	0.405423015	0.023070036	0.404993785	Adnp	protein-coding	Upregulated
ENSMUSG00000040596	418.2838057	-0.273258073	0.482938936	0.023150595	0.405670794	Pogk	protein-coding	Downregulated
ENSMUSG00000028969	107.3022329	0.235184089	0.445041238	0.023215334	0.406271771	Cdk5	protein-coding	Upregulated
ENSMUSG00000087396	103.1411316	-0.386805315	0.636669427	0.023229969	0.406271771	4933407K13Rik	ncRNA	Downregulated
ENSMUSG00000022537	85.21635802	-0.227675325	0.432439416	0.023358319	0.407599165	Tmem44	protein-coding	Downregulated
ENSMUSG00000073647	79.91998935	-0.259029649	0.463147954	0.023415045	0.407866862			Downregulated
ENSMUSG00000059136	15.94290172	0.138718213	0.366623069	0.023483548	0.407866862	Or13a25	protein-coding	Upregulated
ENSMUSG00000097451	194.9631572	-0.162357551	0.38208047	0.023485251	0.407866862			Downregulated
ENSMUSG00000082088	47.86435532	0.141978899	0.364673683	0.023494194	0.407866862	Gm15753	pseudo	Upregulated
ENSMUSG00000041144	30.72439726	-0.201687297	0.414630995	0.023496126	0.407866862	Dnah7b	protein-coding	Downregulated
ENSMUSG00000024206	418.0305763	0.370652394	0.615270732	0.023554296	0.40826862	Rfx2	protein-coding	Upregulated
ENSMUSG00000040856	120.0160091	-0.206947074	0.411886194	0.023596003	0.408687683	Dlk1	protein-coding	Downregulated
ENSMUSG00000030793	333.1418592	0.248842267	0.450663525	0.023639588	0.409047151	Pycard	protein-coding	Upregulated
ENSMUSG00000118841	176328.8136	0.594851529	0.650479818	0.023651849	0.409047151	Rn7s2	scRNA	Upregulated
ENSMUSG00000117698	33.39612127	-0.165145322	0.38122689	0.023681703	0.409259851	BC037704	ncRNA	Downregulated
ENSMUSG00000024781	549.353314	0.238049312	0.434527176	0.023806809	0.410141135	Lipa	protein-coding	Upregulated
ENSMUSG00000057134	337.8739829	0.370518049	0.608051193	0.023814723	0.410141135	Ado	protein-coding	Upregulated
ENSMUSG00000052056	1595.790758	0.365606928	0.607520649	0.023820662	0.410141135	Zfp217	protein-coding	Upregulated
ENSMUSG00000079553	253.6043578	0.325760193	0.545149998	0.023908766	0.410406756	Kifc1	protein-coding	Upregulated
ENSMUSG00000050796	113.0225855	0.438746708	0.701663048	0.023936676	0.410406756	B3galt6	protein-coding	Upregulated
ENSMUSG00000070583	65.68632917	-0.154638145	0.37189181	0.023945151	0.410406756	Fv1	protein-coding	Downregulated
ENSMUSG00000042417	20.17498434	-0.189710244	0.402292597	0.0239594	0.410406756	Ccno	protein-coding	Downregulated
ENSMUSG00000045179	51.34699118	0.21648823	0.42506638	0.024004509	0.410406756	Sox3	protein-coding	Upregulated
ENSMUSG00000050957	46.91766547	0.14220301	0.368557092	0.024012131	0.410406756	Insl6	protein-coding	Upregulated
ENSMUSG00000029190	533.5690365	-0.28033219	0.480202369	0.024069692	0.410845608	D5Ertd579e	protein-coding	Downregulated
ENSMUSG00000029461	748.7447332	-0.514869654	0.709150791	0.024091494	0.410845608	Fam168a	protein-coding	Downregulated
ENSMUSG00000005936	946.5360913	0.574185776	0.682635068	0.02409615	0.410845608	Kctd20	protein-coding	Upregulated
ENSMUSG00002075637	19238.45279	0.522765444	0.753498205	0.024245623	0.412171544			Upregulated
ENSMUSG00000031823	337.7297555	0.527149957	0.74996456	0.024299225	0.41236066	Zdhhc7	protein-coding	Upregulated
ENSMUSG00000042810	498.070899	-0.462475935	0.694869706	0.024363387	0.412810998	Krba1	protein-coding	Downregulated
ENSMUSG00000043923	203.5305627	-0.1785514	0.392084539	0.024384464	0.412810998	Cenatac	protein-coding	Downregulated
ENSMUSG00000034587	68.96401087	-0.341295638	0.570577736	0.024419052	0.41282187	8430429K09Rik	ncRNA	Downregulated
ENSMUSG00000027318	16.01697184	-0.158899416	0.380918154	0.024453778	0.413109372	Adam33	protein-coding	Downregulated
ENSMUSG00000024666	63.88760739	-0.230938425	0.439102552	0.024768026	0.416687794	Tmem138	protein-coding	Downregulated
ENSMUSG00000000938	137.7648812	-0.49498374	0.737214554	0.024772843	0.416687794	Hoxa10	protein-coding	Downregulated
ENSMUSG00000073838	992.1790315	0.355364198	0.572308281	0.024884739	0.417665895	Tufm	protein-coding	Upregulated
ENSMUSG00000022636	504.7886736	-0.565326783	0.653014337	0.025034913	0.419738745	Alcam	protein-coding	Downregulated
ENSMUSG00000071660	541.0134017	0.345414944	0.560973569	0.025065184	0.419738745	Ttc9c	protein-coding	Upregulated
ENSMUSG00000053684	138.7976868	-0.300836285	0.501727996	0.025071324	0.419738745	Kics2	protein-coding	Downregulated
ENSMUSG00000021748	693.4713592	0.412799438	0.650146387	0.025107613	0.419738745	Pdhb	protein-coding	Upregulated
ENSMUSG00000043262	241.5680586	-0.210139629	0.41317364	0.025129365	0.419738745	Uevld	protein-coding	Downregulated
ENSMUSG00000028459	422.0012229	0.207234396	0.41276229	0.025134272	0.419738745	Cd72	protein-coding	Upregulated
ENSMUSG00000073664	356.7849143	-0.205110267	0.408945387	0.025173544	0.420093645	Nbeal1	protein-coding	Downregulated
ENSMUSG00000026806	216.1938744	0.264355667	0.468415272	0.025244294	0.420371592	Ddx31	protein-coding	Upregulated
ENSMUSG00000029032	48.86384076	-0.209292947	0.416649582	0.025280429	0.42067284	Arhgef16	protein-coding	Downregulated
ENSMUSG00000006641	80.94321922	0.212528432	0.420940681	0.025307732	0.420826791	Slc5a6	protein-coding	Upregulated
ENSMUSG00000025862	3727.385694	0.256708403	0.45475649	0.025347328	0.421097843	Stag2	protein-coding	Upregulated
ENSMUSG00000049878	712.6769995	-0.237578933	0.438721753	0.025385118	0.421097843	Rlf	protein-coding	Downregulated
ENSMUSG00000037580	288.5225665	-0.256146303	0.455909347	0.025396284	0.421097843	Gch1	protein-coding	Downregulated
ENSMUSG00000056498	115.9072044	-0.183543087	0.390890679	0.025611889	0.42316794	Tmem154	protein-coding	Downregulated
ENSMUSG00000079555	474.3309086	0.216804529	0.417562697	0.025653108	0.423249044	Haus3	protein-coding	Upregulated
ENSMUSG00000048218	111.1248908	-0.394353203	0.651168861	0.025689036	0.423542076	Amigo2	protein-coding	Downregulated
ENSMUSG00000019975	122.7277605	-0.510350681	0.738744258	0.025860286	0.425422503	Ikbip	protein-coding	Downregulated
ENSMUSG00000021646	447.5680999	0.245073554	0.442240601	0.025876082	0.425422503	Mccc2	protein-coding	Upregulated
ENSMUSG00000039018	97.61493105	0.223243585	0.425696047	0.025920325	0.425828781	Mtg1	protein-coding	Upregulated
ENSMUSG00000037432	31.4015024	-0.198315436	0.408815184	0.025976747	0.425828781	Fer1l5	protein-coding	Downregulated
ENSMUSG00000031059	426.7544836	0.540718986	0.671860947	0.02611495	0.426931231	Ndufb11	protein-coding	Upregulated
ENSMUSG00000022551	465.3106795	0.275071791	0.480447296	0.026159037	0.426931231	Cyc1	protein-coding	Upregulated
ENSMUSG00000040594	104.1992821	-0.288999587	0.496601996	0.026188627	0.426931231	Ranbp17	protein-coding	Downregulated
ENSMUSG00000073530	27.02026945	-0.213795663	0.424061715	0.0262008	0.426931231	Pappa2	protein-coding	Downregulated
ENSMUSG00000028456	219.606616	0.471771921	0.703129891	0.026235874	0.426931231	Unc13b	protein-coding	Upregulated
ENSMUSG00000105230	23.57023295	0.162823688	0.381802124	0.026244411	0.426931231			Upregulated
ENSMUSG00000002014	603.0057434	0.404160953	0.632715919	0.026249034	0.426931231	Ssr4	protein-coding	Upregulated
ENSMUSG00000041187	848.0108336	-0.4405627	0.67063721	0.026277204	0.426931231	Prkd2	protein-coding	Downregulated
ENSMUSG00000042607	26.48828095	0.15323668	0.373488201	0.026319179	0.427283438	Asb4	protein-coding	Upregulated
ENSMUSG00000040010	1084.192722	0.424695308	0.653892811	0.026370587	0.427820107	Slc7a5	protein-coding	Upregulated
ENSMUSG00000024534	68.89645338	-0.20034225	0.412030259	0.026455237	0.428299267	Sncaip	protein-coding	Downregulated
ENSMUSG00000027715	399.9202461	0.325078554	0.548467068	0.026499622	0.42844674	Ccna2	protein-coding	Upregulated
ENSMUSG00000020107	344.0235489	0.467793202	0.690587288	0.026501102	0.42844674	Anapc16	protein-coding	Upregulated
ENSMUSG00000032198	387.5299511	-0.527304206	0.668356734	0.026617192	0.430025368	Dock6	protein-coding	Downregulated
ENSMUSG00000094910	33.95076103	-0.239020024	0.448086523	0.026783636	0.431518253	D430019H16Rik	protein-coding	Downregulated
ENSMUSG00000060681	251.0181416	0.51147768	0.735614876	0.026966471	0.433634539	Slc9a6	protein-coding	Upregulated
ENSMUSG00000075480	29.17096719	0.189498229	0.401478648	0.026970792	0.433634539			Upregulated
ENSMUSG00000040151	465.6087645	-0.271533139	0.467533538	0.026997535	0.433765363	Hs2st1	protein-coding	Downregulated
ENSMUSG00000029507	823.6584505	0.258051978	0.453628775	0.027213509	0.436117002	Pus1	protein-coding	Upregulated
ENSMUSG00000061991	1519.621327	0.139494847	0.367992549	0.02723778	0.436117002	H2ac10	protein-coding	Upregulated
ENSMUSG00000087052	36.23292668	-0.153919098	0.373183446	0.027246585	0.436117002			Downregulated
ENSMUSG00000048379	667.834288	-0.246861965	0.443447147	0.02727485	0.436117002	Socs4	protein-coding	Downregulated
ENSMUSG00000073176	67.60489256	-0.22437326	0.429662898	0.027354628	0.437092839	Zfp449	protein-coding	Downregulated
ENSMUSG00000022197	177.9084442	-0.424029379	0.643782185	0.027417059	0.437790341	Pdzd2	protein-coding	Downregulated
ENSMUSG00000071341	129.0046926	-0.206021585	0.412099505	0.027678308	0.440278954	Egr4	protein-coding	Downregulated
ENSMUSG00000071516	2937.532447	0.430753647	0.67034691	0.027683523	0.440278954	H2ac13	protein-coding	Upregulated
ENSMUSG00000091685	24.11907834	-0.17065643	0.38522525	0.027708489	0.440332659	Gm17359	protein-coding	Downregulated
ENSMUSG00000031327	49.27200607	-0.217067624	0.41827381	0.027825658	0.441368223	Chic1	protein-coding	Downregulated
ENSMUSG00000021908	138.4449785	0.40993703	0.651594433	0.027831985	0.441368223			Upregulated
ENSMUSG00000028367	628.4194566	0.296097924	0.499339703	0.027878573	0.441530683	Txn1	protein-coding	Upregulated
ENSMUSG00000045680	33.20078628	0.178623288	0.390755993	0.027919698	0.441881821	Tcf21	protein-coding	Upregulated
ENSMUSG00000073418	39.60991644	-0.254787181	0.460653683	0.028009901	0.442408409	C4b	protein-coding	Downregulated
ENSMUSG00000034957	423.3908661	0.510996871	0.685661586	0.028031793	0.442454431	Cebpa	protein-coding	Upregulated
ENSMUSG00000052221	16.58891394	-0.160527705	0.382176701	0.028180825	0.444205254	Ppp1r36	protein-coding	Downregulated
ENSMUSG00000021754	1389.239134	-0.25692205	0.456273046	0.028271884	0.444616174	Map3k1	protein-coding	Downregulated
ENSMUSG00000027673	333.2561734	0.312746266	0.516243517	0.028289699	0.444616174	Ndufb5	protein-coding	Upregulated
ENSMUSG00000008763	1062.48141	-0.401073255	0.619136849	0.028302252	0.444616174	Man1a2	protein-coding	Downregulated
ENSMUSG00000032679	129.3695414	0.313453324	0.518939145	0.028343583	0.444666186	Cd59a	protein-coding	Upregulated
ENSMUSG00000120045	32.97716099	-0.174649663	0.391278584	0.028383886	0.444999019			Downregulated
ENSMUSG00000029016	196.4034388	-0.261447883	0.460193405	0.028473193	0.446099166	Clcn6	protein-coding	Downregulated
ENSMUSG00000047193	362.1940035	-0.290845781	0.488702803	0.028574212	0.447236317	Dync2h1	protein-coding	Downregulated
ENSMUSG00000024989	125.3351431	0.179741085	0.389678713	0.028657623	0.447784964	Cep55	protein-coding	Upregulated
ENSMUSG00000028646	658.1782036	0.224157738	0.420424182	0.028721738	0.448255552	Rragc	protein-coding	Upregulated
ENSMUSG00000042155	232.9189533	0.252599398	0.452485432	0.028792832	0.448454491	Klhl23	protein-coding	Upregulated
ENSMUSG00000024581	408.8227338	-0.435308621	0.680298008	0.028812526	0.448454491	Napg	protein-coding	Downregulated
ENSMUSG00000048787	88.82105537	-0.204627034	0.407338323	0.028815889	0.448454491	Dcun1d3	protein-coding	Downregulated
ENSMUSG00000031778	226.2328129	-0.201161002	0.409030261	0.028935927	0.449172759	Cx3cl1	protein-coding	Downregulated
ENSMUSG00000034460	128.1010868	-0.175616711	0.387516064	0.028983822	0.449172759	Six4	protein-coding	Downregulated
ENSMUSG00000033350	71.98048018	-0.192618216	0.404577769	0.028987077	0.449172759	Chst2	protein-coding	Downregulated
ENSMUSG00000043067	461.3300752	0.251824022	0.447424548	0.029022375	0.449172759	Dpy19l1	protein-coding	Upregulated
ENSMUSG00000024039	57.0395551	0.140882238	0.365133161	0.029032442	0.449172759	Cbs	protein-coding	Upregulated
ENSMUSG00000097365	175.1936483	0.225619568	0.426940937	0.029072155	0.449172759	C030034L19Rik	ncRNA	Upregulated
ENSMUSG00000026180	28.32830943	0.152764948	0.37379561	0.029097768	0.449172759	Cxcr2	protein-coding	Upregulated
ENSMUSG00000038372	249.7866938	0.249947799	0.448426686	0.029112514	0.449172759	Gmds	protein-coding	Upregulated
ENSMUSG00000045362	96.5682591	-0.34075663	0.552984709	0.02915573	0.449542027	Tnfrsf26	protein-coding	Downregulated
ENSMUSG00000027544	725.8316236	-0.226588058	0.424801375	0.029176101	0.449558793	Nfatc2	protein-coding	Downregulated
ENSMUSG00000020608	1331.358847	0.485183865	0.691557676	0.029262205	0.44983963	Smc6	protein-coding	Upregulated
ENSMUSG00000037514	583.4328686	0.254439487	0.450420985	0.029291817	0.449855155	Pank2	protein-coding	Upregulated
ENSMUSG00000118456	65.32119667	-0.204067767	0.410374262	0.029319347	0.44998153			Downregulated
ENSMUSG00000031955	170.2778683	0.296385129	0.50590224	0.029421326	0.45124958	Bcar1	protein-coding	Upregulated
ENSMUSG00000040549	1581.011898	0.462578526	0.639500255	0.02955355	0.451929515	Ckap5	protein-coding	Upregulated
ENSMUSG00000061462	132.7138539	-0.365462397	0.586027045	0.029562584	0.451929515	Obscn	protein-coding	Downregulated
ENSMUSG00000029361	33.65308738	-0.222576219	0.428836341	0.029590852	0.451980323	Nos1	protein-coding	Downregulated
ENSMUSG00000040033	435.9820878	-0.282090368	0.493522647	0.029621524	0.451980323	Stat2	protein-coding	Downregulated
ENSMUSG00000026409	166.3797283	-0.155847177	0.369859744	0.02962407	0.451980323	Pfkfb2	protein-coding	Downregulated
ENSMUSG00000017417	62.85511205	0.262955567	0.472014842	0.029694955	0.452278855	Plxdc1	protein-coding	Upregulated
ENSMUSG00000032875	186.206116	-0.442475704	0.645082537	0.029735141	0.452278855	Arhgef17	protein-coding	Downregulated
ENSMUSG00000027284	534.6925833	-0.490422616	0.637574942	0.029874641	0.452434226	Cdan1	protein-coding	Downregulated
ENSMUSG00000038764	194.2925361	-0.31067406	0.511975731	0.029908102	0.452434226	Ptpn3	protein-coding	Downregulated
ENSMUSG00000027615	256.1834549	0.351534079	0.570135756	0.029914837	0.452434226	Hps3	protein-coding	Upregulated
ENSMUSG00000063077	481.9651187	-0.274447088	0.476912028	0.029925517	0.452434226	Kif1b	protein-coding	Downregulated
ENSMUSG00000030074	126.4695511	0.138531799	0.365270127	0.029975237	0.452892223	Gxylt2	protein-coding	Upregulated
ENSMUSG00000043391	221.1775512	-0.426384296	0.638062344	0.030037927	0.453545465	2510009E07Rik	protein-coding	Downregulated
ENSMUSG00000020399	40.83072899	-0.200529557	0.40797509	0.030107171	0.454274751	Havcr2	protein-coding	Downregulated
ENSMUSG00000021277	691.5980339	-0.213052557	0.409316759	0.030125199	0.454274751	Traf3	protein-coding	Downregulated
ENSMUSG00000046311	676.5909671	0.521676189	0.628330804	0.030153567	0.454312024	Zfp62	protein-coding	Upregulated
ENSMUSG00000029684	276.2630422	-0.204803899	0.404980779	0.030209829	0.454392138	Wasl	protein-coding	Downregulated
ENSMUSG00000020513	52.00518654	-0.275114296	0.480124945	0.030235684	0.454392138	Tubd1	protein-coding	Downregulated
ENSMUSG00000085787	49.76163294	-0.24594773	0.448352732	0.030348907	0.45558537			Downregulated
ENSMUSG00000034987	80.72511558	-0.310809708	0.520169082	0.030398441	0.455818711	Hrh2	protein-coding	Downregulated
ENSMUSG00000063576	612.403918	0.256369283	0.449846205	0.030546018	0.455818711	Klhdc3	protein-coding	Upregulated
ENSMUSG00000027306	343.5067656	0.141194598	0.366356704	0.030550292	0.455818711	Nusap1	protein-coding	Upregulated
ENSMUSG00000068606	86.37364164	-0.210020418	0.411744535	0.030561508	0.455818711	Gm4841	protein-coding	Downregulated
ENSMUSG00000032491	50.34622309	0.146806325	0.367284038	0.030579132	0.455818711	Nradd	protein-coding	Upregulated
ENSMUSG00000029089	101.2523375	-0.165312388	0.378577093	0.03063	0.456031344	Pacrgl	protein-coding	Downregulated
ENSMUSG00000024787	218.4307238	0.213036391	0.414337985	0.030666453	0.456031344	Snx15	protein-coding	Upregulated
ENSMUSG00000028565	649.5517444	-0.303191696	0.508500311	0.030758975	0.457032489	Nfia	protein-coding	Downregulated
ENSMUSG00000057842	114.6741866	0.242526259	0.440313803	0.030851772	0.457272756	Zfp595	protein-coding	Upregulated
ENSMUSG00000031714	408.8299943	-0.274397058	0.471456403	0.030853603	0.457272756	Gab1	protein-coding	Downregulated
ENSMUSG00000009013	655.0112813	0.367003174	0.572035272	0.031100754	0.459736666	Dynll1	protein-coding	Upregulated
ENSMUSG00000116733	72.51104828	0.226137115	0.42978856	0.031210028	0.460093669			Upregulated
ENSMUSG00000103472	73.53545704	-0.194034059	0.400665424	0.031221558	0.460093669	Pcdhga7	protein-coding	Downregulated
ENSMUSG00000118071	150.5960705	0.198860525	0.401177938	0.03124834	0.460197441			Upregulated
ENSMUSG00000078652	1505.064402	0.501305205	0.612516393	0.03126921	0.460214068	Psme3	protein-coding	Upregulated
ENSMUSG00000019942	329.1531432	0.391653479	0.62040099	0.031375116	0.461325059	Cdk1	protein-coding	Upregulated
ENSMUSG00000023015	679.9683695	0.233767163	0.436053719	0.031419206	0.461336835	Racgap1	protein-coding	Upregulated
ENSMUSG00000034107	17.98776629	-0.15916982	0.378622753	0.031424651	0.461336835	Ano7	protein-coding	Downregulated
ENSMUSG00000087543	97.96310478	-0.205066301	0.407827653	0.031676787	0.463563375	Gm16576	ncRNA	Downregulated
ENSMUSG00000031938	344.6034688	-0.168307078	0.377313055	0.031695621	0.463563375	4931406C07Rik	protein-coding	Downregulated
ENSMUSG00000052698	148.876012	-0.333843685	0.534264752	0.032048586	0.467766972	Tln2	protein-coding	Downregulated
ENSMUSG00000024193	166.421697	-0.179531136	0.385856227	0.032063296	0.467766972	Phf1	protein-coding	Downregulated
ENSMUSG00000036805	29.9400656	-0.224253816	0.430732891	0.032102432	0.468045022	Noxa1	protein-coding	Downregulated
ENSMUSG00000015944	493.0025603	0.231557541	0.426457629	0.032145994	0.468387223	Castor2	protein-coding	Upregulated
ENSMUSG00000027469	1027.884575	0.329696317	0.545417041	0.032389439	0.470029285	Tpx2	protein-coding	Upregulated
ENSMUSG00000121093	190.33524	-0.417812893	0.630280475	0.032428936	0.470029285			Downregulated
ENSMUSG00000024754	272.0828109	0.25671604	0.458685541	0.032430175	0.470029285	Cemip2	protein-coding	Upregulated
ENSMUSG00000073555	101.3323216	-0.374606923	0.59151754	0.032482504	0.470029285	Gm4951	protein-coding	Downregulated
ENSMUSG00000039652	77.34929741	-0.261439751	0.461875851	0.032505985	0.470029285	Cpeb3	protein-coding	Downregulated
ENSMUSG00000036053	415.6247195	-0.30237527	0.498864307	0.032516054	0.470029285	Fmnl2	protein-coding	Downregulated
ENSMUSG00000026579	159.1640199	-0.216342557	0.414277736	0.032540954	0.470029285	F5	protein-coding	Downregulated
ENSMUSG00000043424	86.43501742	0.434485507	0.652182944	0.032591273	0.470464604	Eif3j2	protein-coding	Upregulated
ENSMUSG00000026933	889.4864799	-0.507575123	0.568708148	0.03271181	0.471136463	Camsap1	protein-coding	Downregulated
ENSMUSG00000026012	93.66038639	-0.213376858	0.420384337	0.032758746	0.471136463	Cd28	protein-coding	Downregulated
ENSMUSG00000029632	518.368041	0.374615226	0.576816763	0.032782024	0.471136463	Ndufa4	protein-coding	Upregulated
ENSMUSG00000071714	259.9927861	0.213815802	0.410581609	0.032829227	0.471136463	Csf2rb2	protein-coding	Upregulated
ENSMUSG00000024975	5516.654793	0.50130019	0.589426038	0.032839872	0.471136463	Pdcd4	protein-coding	Upregulated
ENSMUSG00000041119	47.45281496	-0.254010849	0.456590091	0.032976403	0.471935558	Pde9a	protein-coding	Downregulated
ENSMUSG00000017550	686.0887407	0.176353568	0.382614738	0.033008002	0.471935558	Atad5	protein-coding	Upregulated
ENSMUSG00000039842	565.9679262	0.297065421	0.488428483	0.03301949	0.471935558	Mcph1	protein-coding	Upregulated
ENSMUSG00000024570	667.9999117	0.376060137	0.569170615	0.033097527	0.472217042	Rbfa	protein-coding	Upregulated
ENSMUSG00000039081	132.5211114	-0.469665762	0.645857206	0.033158028	0.472634592	Zfp503	protein-coding	Downregulated
ENSMUSG00000029920	871.5577802	0.225342256	0.425312092	0.03338794	0.474907285	Smarcad1	protein-coding	Upregulated
ENSMUSG00000062040	127.0019665	-0.214344535	0.412155033	0.03349456	0.475446862	Zfp27	protein-coding	Downregulated
ENSMUSG00000027661	24.36200499	-0.200713887	0.409871081	0.033505936	0.475446862	Slc2a10	protein-coding	Downregulated
ENSMUSG00000040537	321.8381109	-0.155634391	0.371614705	0.033507451	0.475446862	Adam22	protein-coding	Downregulated
ENSMUSG00000000167	36.47822581	-0.281674413	0.486960465	0.033577272	0.475569228	Pih1d2	protein-coding	Downregulated
ENSMUSG00000071256	136.4329453	-0.163651485	0.376242831	0.033636636	0.475726128	Zfp213	protein-coding	Downregulated
ENSMUSG00000042787	266.9321704	0.18717151	0.389107298	0.033652299	0.475726128	Exog	protein-coding	Upregulated
ENSMUSG00000019278	184.8963999	-0.327108029	0.530904655	0.033708258	0.475726128	Dpep1	protein-coding	Downregulated
ENSMUSG00000091475	53.74172785	-0.194647557	0.403008823	0.033942723	0.477103107	Cerox1	ncRNA	Downregulated
ENSMUSG00000038456	111.1060413	-0.232050506	0.436791501	0.033951617	0.477103107	Dennd2a	protein-coding	Downregulated
ENSMUSG00000020654	141.2218473	-0.350066392	0.561204959	0.034222354	0.47870871	Adcy3	protein-coding	Downregulated
ENSMUSG00000022557	806.1581056	0.305993343	0.501004782	0.034227831	0.47870871	Bop1	protein-coding	Upregulated
ENSMUSG00000044317	58.2665686	-0.316607209	0.526170029	0.034291948	0.47880831	Gpr4	protein-coding	Downregulated
ENSMUSG00000071478	360.1929055	0.275598959	0.467007691	0.034336657	0.478832842	H2ac7	protein-coding	Upregulated
ENSMUSG00000029787	829.4697832	-0.319727565	0.516423552	0.03434172	0.478832842	Avl9	protein-coding	Downregulated
ENSMUSG00000023345	161.5164141	0.164330637	0.380536956	0.034528465	0.480735318	Poc1a	protein-coding	Upregulated
ENSMUSG00000038692	162.1800247	0.188657761	0.395353473	0.034570109	0.480735318	Hoxb4	protein-coding	Upregulated
ENSMUSG00000020823	743.2762789	-0.312937767	0.504046267	0.03461284	0.480735318	Sec14l1	protein-coding	Downregulated
ENSMUSG00000043467	436.212303	-0.262004021	0.459121348	0.034614644	0.480735318	Zbtb37	protein-coding	Downregulated
ENSMUSG00000038005	347.4071912	0.442040342	0.614244905	0.03463504	0.480735318	Hpf1	protein-coding	Upregulated
ENSMUSG00000033991	732.6392642	0.238346913	0.431607139	0.034744307	0.480994081	Skic3	protein-coding	Upregulated
ENSMUSG00000030257	770.081395	-0.365067343	0.568352161	0.034774103	0.481120867	Srgap3	protein-coding	Downregulated
ENSMUSG00000039410	1051.717541	-0.18829557	0.39096557	0.034869814	0.481873129	Prdm16	protein-coding	Downregulated
ENSMUSG00000057551	367.7208278	-0.221334607	0.417112105	0.035062806	0.48299775	Zfp317	protein-coding	Downregulated
ENSMUSG00000032540	142.3821985	-0.166783027	0.378342428	0.035073726	0.48299775	Abhd5	protein-coding	Downregulated
ENSMUSG00000016255	21.26218435	-0.156350451	0.375555414	0.035138007	0.48299775	Tubb1	protein-coding	Downregulated
ENSMUSG00000029209	160.1904175	-0.419778795	0.609864371	0.035150492	0.48299775	Gnpda2	protein-coding	Downregulated
ENSMUSG00000043885	259.7283421	-0.187126267	0.390935082	0.03516508	0.48299775	Slc36a4	protein-coding	Downregulated
ENSMUSG00000032735	24.45831601	-0.158887444	0.377132564	0.035186777	0.48299775	Ablim3	protein-coding	Downregulated
ENSMUSG00000030727	374.563504	-0.231608645	0.42472024	0.03520136	0.48299775	Rabep2	protein-coding	Downregulated
ENSMUSG00000097000	71.96282186	0.247596463	0.449383382	0.035241246	0.48299775			Upregulated
ENSMUSG00000021460	270.7751697	0.433649943	0.606917894	0.035389	0.484263695	Auh	protein-coding	Upregulated
ENSMUSG00000015243	751.9534188	-0.329702492	0.519226576	0.035413749	0.484263695	Abca1	protein-coding	Downregulated
ENSMUSG00000019726	884.9408312	-0.354233976	0.530531206	0.035416703	0.484263695	Lyst	protein-coding	Downregulated
ENSMUSG00000028214	792.7574451	-0.32477958	0.518438768	0.035493243	0.485025776	Gem	protein-coding	Downregulated
ENSMUSG00000056612	656.4503675	0.338235926	0.546926825	0.035580471	0.485198529	Ppp1r14b	protein-coding	Upregulated
ENSMUSG00000021906	157.2914376	0.298763796	0.491347652	0.035603639	0.485198529	Oxnad1	protein-coding	Upregulated
ENSMUSG00000097471	39.04475011	-0.169832517	0.385485864	0.035708089	0.486112717	5830432E09Rik	ncRNA	Downregulated
ENSMUSG00000037936	601.290389	0.425573064	0.588671657	0.035718744	0.486112717	Scarb1	protein-coding	Upregulated
ENSMUSG00000032737	531.815734	-0.202512488	0.404440372	0.035904568	0.487768166	Inppl1	protein-coding	Downregulated
ENSMUSG00000045589	12.9752807	-0.168201214	0.383866693	0.035926415	0.487768166	Frrs1l	protein-coding	Downregulated
ENSMUSG00000005267	65.34810221	-0.351109561	0.55483182	0.036016247	0.487768166	Zfp287	protein-coding	Downregulated
ENSMUSG00000105502	57.60451201	0.167862001	0.381443433	0.036027927	0.487768166			Upregulated
ENSMUSG00000031983	225.5541942	-0.429334407	0.598122573	0.036029794	0.487768166	2310022B05Rik	protein-coding	Downregulated
ENSMUSG00000026715	36.00782133	0.205624614	0.409449286	0.03610048	0.487768166	Serpinc1	protein-coding	Upregulated
ENSMUSG00000050428	211.4645349	0.140028391	0.361247805	0.036122617	0.487768166	Fbxo46	protein-coding	Upregulated
ENSMUSG00000002603	3327.329047	0.479319573	0.577736603	0.036155987	0.487768166	Tgfb1	protein-coding	Upregulated
ENSMUSG00000032030	602.9541456	0.218088519	0.411197009	0.036215817	0.488034308	Cul5	protein-coding	Upregulated
ENSMUSG00000085125	50.26626733	-0.214570793	0.414443335	0.036246655	0.488167693	Gm16070	ncRNA	Downregulated
ENSMUSG00000070498	33.84884812	-0.173229307	0.387510929	0.036497255	0.490692335	Tmem132b	protein-coding	Downregulated
ENSMUSG00000071547	453.8299058	0.364265598	0.561953808	0.03664098	0.490980913	Nt5dc2	protein-coding	Upregulated
ENSMUSG00000030659	32.0877537	-0.155467674	0.371648391	0.036642353	0.490980913	Nucb2	protein-coding	Downregulated
ENSMUSG00000030156	2620.628793	0.456339368	0.594000888	0.036662833	0.490980913	Cd69	protein-coding	Upregulated
ENSMUSG00000041396	48.84213257	0.190274874	0.398361901	0.036687657	0.490980913	Mettl18	protein-coding	Upregulated
ENSMUSG00000022428	160.3608178	-0.328801068	0.518396079	0.036708263	0.490980913	Cby1	protein-coding	Downregulated
ENSMUSG00000085175	45.48468314	-0.173515438	0.383712847	0.036808895	0.49149788	Gm11423	ncRNA	Downregulated
ENSMUSG00000060621	28.21628264	-0.196020885	0.403344808	0.036810162	0.49149788	Nkpd1	protein-coding	Downregulated
ENSMUSG00000096010	519.4927443	0.226363169	0.423407319	0.036881603	0.492169895	H4c16	protein-coding	Upregulated
ENSMUSG00000086141	43.29397142	-0.167318503	0.384690024	0.036934237	0.492408271	9030622O22Rik	ncRNA	Downregulated
ENSMUSG00000034574	332.4992098	0.163922646	0.374343597	0.036941709	0.492408271	Daam1	protein-coding	Upregulated
ENSMUSG00000090625	53.21148939	-0.166934741	0.379313212	0.036985659	0.492491334			Downregulated
ENSMUSG00000047409	857.6958454	0.15017742	0.365719085	0.036997491	0.492491334	Ctdspl	protein-coding	Upregulated
ENSMUSG00000031827	1165.964651	0.485485121	0.55859473	0.037099516	0.493108323	Cotl1	protein-coding	Upregulated
ENSMUSG00000042460	774.1874194	0.384497492	0.560298064	0.037143218	0.493133937	C1galt1	protein-coding	Upregulated
ENSMUSG00000028069	635.592173	-0.206645245	0.403803961	0.037146716	0.493133937	Gpatch4	protein-coding	Downregulated
ENSMUSG00000032350	394.2590287	-0.187996041	0.38931416	0.037171055	0.493133937	Gclc	protein-coding	Downregulated
ENSMUSG00000032096	2325.59456	0.341675037	0.524185848	0.037463135	0.49435036	Arcn1	protein-coding	Upregulated
ENSMUSG00000047603	77.82779883	-0.235134684	0.436961942	0.037519371	0.49435036	Zfp235	protein-coding	Downregulated
ENSMUSG00000020607	59.48440801	0.18939462	0.399717252	0.037551674	0.49435036	Lratd1	protein-coding	Upregulated
ENSMUSG00000059810	400.6535203	-0.294161349	0.487278608	0.037661091	0.49435036	Rgs3	protein-coding	Downregulated
ENSMUSG00000051510	895.6479363	-0.180555671	0.387841168	0.037677093	0.49435036	Mafg	protein-coding	Downregulated
ENSMUSG00000060450	481.9184152	-0.402603794	0.569946366	0.037688215	0.49435036	Rnf14	protein-coding	Downregulated
ENSMUSG00000032913	262.0813305	-0.215111953	0.41223334	0.037701867	0.49435036	Lrig2	protein-coding	Downregulated
ENSMUSG00000053613	57.52709326	0.141480622	0.366582082	0.037726729	0.49435036			Upregulated
ENSMUSG00000078572	99.43260447	0.186123058	0.392508765	0.037744852	0.49435036	Ndufaf8	protein-coding	Upregulated
ENSMUSG00000112825	265.6545171	0.366762374	0.551932193	0.037805901	0.49435036			Upregulated
ENSMUSG00000107374	30.98834909	0.142166814	0.369372112	0.037853095	0.49435036			Upregulated
ENSMUSG00000008393	122.3556514	0.189105224	0.394534348	0.037913614	0.49435036	Carhsp1	protein-coding	Upregulated
ENSMUSG00000085355	64.21295211	-0.317992685	0.522296111	0.037928934	0.49435036	3010003L21Rik	ncRNA	Downregulated
ENSMUSG00000045932	403.334675	0.31990988	0.509553515	0.037975118	0.49435036	Ifit2	protein-coding	Upregulated
ENSMUSG00000029913	172.3241491	-0.153469705	0.369074156	0.037978016	0.49435036	Prdm5	protein-coding	Downregulated
ENSMUSG00000029553	175.0126513	-0.158294513	0.376327724	0.038002177	0.494388808	Tfec	protein-coding	Downregulated
ENSMUSG00000014763	440.6761009	-0.192759203	0.393079127	0.038027912	0.494447687	Fam120b	protein-coding	Downregulated
ENSMUSG00002075795	36509.94081	0.46128733	0.583635272	0.038068892	0.494704612			Upregulated
ENSMUSG00000097777	21.52926652	-0.201009595	0.408240652	0.038099248	0.494823264			Downregulated
ENSMUSG00000092083	24.34063464	-0.166581781	0.383830101	0.038367792	0.496836782	Kcnb2	protein-coding	Downregulated
ENSMUSG00000021217	83.38819873	-0.173815528	0.382928503	0.038439233	0.496836782	Tshz3	protein-coding	Downregulated
ENSMUSG00000041058	294.6981487	-0.219513852	0.415045794	0.0384573	0.496836782	Wwp1	protein-coding	Downregulated
ENSMUSG00000020305	140.6781469	0.257464057	0.448877853	0.038463005	0.496836782	Asb3	protein-coding	Upregulated
ENSMUSG00000022090	197.4146118	-0.222064149	0.417927447	0.038536215	0.496836782	Pdlim2	protein-coding	Downregulated
ENSMUSG00000095217	1389.054869	0.41222009	0.602147757	0.038541141	0.496836782	H2bc15	protein-coding	Upregulated
ENSMUSG00000038722	316.1046114	0.249930221	0.4413684	0.038936538	0.500953373	Bud31	protein-coding	Upregulated
ENSMUSG00000021243	241.6806752	0.323898	0.518383239	0.03902895	0.501312345	Fcf1	protein-coding	Upregulated
ENSMUSG00000025521	125.592422	0.251121324	0.442141195	0.039171457	0.501643129	Tmem192	protein-coding	Upregulated
ENSMUSG00000038168	84.05645584	0.179314846	0.386634322	0.039173551	0.501643129	P3h2	protein-coding	Upregulated
ENSMUSG00000060227	542.4133266	0.224822851	0.420048635	0.039205327	0.501643129	Golm2	protein-coding	Upregulated
ENSMUSG00000071074	403.4864479	0.264164313	0.451710826	0.039325933	0.502819993	Yipf3	protein-coding	Upregulated
ENSMUSG00000043794	34.04602522	-0.158760247	0.373020313	0.03934044	0.502819993			Downregulated
ENSMUSG00000062939	572.9837918	-0.362181143	0.545796238	0.03942821	0.503486472	Stat4	protein-coding	Downregulated
ENSMUSG00000030064	290.4471311	-0.363983923	0.550715077	0.039466762	0.503486472	Frmd4b	protein-coding	Downregulated
ENSMUSG00000026766	219.1981409	0.371113153	0.558553751	0.039510872	0.503617795	Mmadhc	protein-coding	Upregulated
ENSMUSG00000028884	376.7067281	0.269541033	0.463571554	0.039677635	0.504878089	Rpa2	protein-coding	Upregulated
ENSMUSG00000031375	411.8123421	-0.169452952	0.378452188	0.03972466	0.504878089	Bgn	protein-coding	Downregulated
ENSMUSG00000028010	240.6534456	0.181280324	0.386138068	0.039736848	0.504878089	Gar1	protein-coding	Upregulated
ENSMUSG00000025157	192.3216657	-0.163511151	0.374982473	0.039761102	0.504878089	Zdhhc16	protein-coding	Downregulated
ENSMUSG00000005299	877.6423496	0.412628057	0.59315752	0.039773348	0.504878089	Letm1	protein-coding	Upregulated
ENSMUSG00000058979	122.5296732	-0.163200583	0.374618203	0.039782999	0.504878089	Hdhd5	protein-coding	Downregulated
ENSMUSG00000027637	505.9944596	0.408551288	0.565108688	0.039820107	0.505074078	Rab5if	protein-coding	Upregulated
ENSMUSG00000030830	477.4696239	0.271011665	0.463017978	0.039896977	0.505773917	Itgal	protein-coding	Upregulated
ENSMUSG00000001211	385.3406987	-0.25002494	0.442749805	0.039993712	0.506724678	Agpat3	protein-coding	Downregulated
ENSMUSG00000027775	584.9570846	0.340107604	0.524616464	0.040049675	0.507158109	Mfsd1	protein-coding	Upregulated
ENSMUSG00000022043	1001.093829	0.37111729	0.554394667	0.0400848	0.507300171	Trim35	protein-coding	Upregulated
ENSMUSG00000026628	3968.099154	-0.464328362	0.569155448	0.040104414	0.507300171	Atf3	protein-coding	Downregulated
ENSMUSG00000029516	884.7354154	0.236008743	0.434683978	0.040177958	0.507863411	Cit	protein-coding	Upregulated
ENSMUSG00000062127	93.36640971	-0.216628855	0.416381635	0.040235828	0.508006793	Cttnbp2nl	protein-coding	Downregulated
ENSMUSG00000031767	134.6467265	0.137936204	0.365042447	0.04034365	0.50859362	Nudt7	protein-coding	Upregulated
ENSMUSG00000033186	362.43353	0.272686872	0.457962568	0.040455393	0.50859362	Mzt1	protein-coding	Upregulated
ENSMUSG00000025504	104.5513213	-0.170180338	0.38317695	0.040456946	0.50859362	Eps8l2	protein-coding	Downregulated
ENSMUSG00000089669	86.02799088	-0.231689373	0.430814378	0.040458143	0.50859362	Tnfsf13	protein-coding	Downregulated
ENSMUSG00000031493	164.6614528	0.144343037	0.365960384	0.040468458	0.50859362	Ggn	protein-coding	Upregulated
ENSMUSG00000030029	50.75229709	-0.205007771	0.40409282	0.040519428	0.50870827	Lrig1	protein-coding	Downregulated
ENSMUSG00000029163	1534.711174	0.271992784	0.460782112	0.040575383	0.50870827	Emilin1	protein-coding	Upregulated
ENSMUSG00000038725	145.5724015	-0.270347412	0.461918432	0.040616426	0.50870827	Pkhd1l1	protein-coding	Downregulated
ENSMUSG00000026775	1181.71783	0.247251968	0.436507256	0.040693879	0.50912046	Yme1l1	protein-coding	Upregulated
ENSMUSG00000032714	218.6083297	-0.337870511	0.519357093	0.040843632	0.5097364	Syde1	protein-coding	Downregulated
ENSMUSG00000044595	137.7958622	0.298207205	0.488232921	0.040969279	0.51076769	Dnd1	protein-coding	Upregulated
ENSMUSG00000041817	26.64634979	-0.17278349	0.384850595	0.041008364	0.510971663	Fam169a	protein-coding	Downregulated
ENSMUSG00000079334	262.41879	0.197066925	0.398684836	0.041053074	0.511037134	Naa80	protein-coding	Upregulated
ENSMUSG00000031292	161.6513447	-0.209670893	0.407573268	0.041073923	0.511037134	Cdkl5	protein-coding	Downregulated
ENSMUSG00000037683	46.91049322	-0.157383095	0.373761999	0.041092344	0.511037134	Armc3	protein-coding	Downregulated
ENSMUSG00000031107	128.2380937	0.237357191	0.432612446	0.041332901	0.512452234	Rbmx2	protein-coding	Upregulated
ENSMUSG00000032932	308.5008792	0.19577829	0.39341203	0.041469714	0.512452234	Hspa13	protein-coding	Upregulated
ENSMUSG00000021288	577.8317662	-0.295413992	0.476031112	0.041482754	0.512452234	Klc1	protein-coding	Downregulated
ENSMUSG00000045107	31.95167746	-0.213521231	0.414332684	0.041491037	0.512452234	Saysd1	protein-coding	Downregulated
ENSMUSG00000087142	105.9451554	-0.221181267	0.416564224	0.041515529	0.512452234			Downregulated
ENSMUSG00000053931	95.86516576	0.181914074	0.391140015	0.041595771	0.512452234	Cnn3	protein-coding	Upregulated
ENSMUSG00000029097	191.1780338	0.156965926	0.371558301	0.041643722	0.512452234	Trmt44	protein-coding	Upregulated
ENSMUSG00000049957	371.5165919	-0.269384995	0.457825081	0.041669558	0.512452234	Ccdc137	protein-coding	Downregulated
ENSMUSG00000032127	385.9952029	-0.243386514	0.433307364	0.0416717	0.512452234	Vps11	protein-coding	Downregulated
ENSMUSG00000040957	202.9513763	-0.320578437	0.516928942	0.041676723	0.512452234	Cables1	protein-coding	Downregulated
ENSMUSG00000020413	267.2248781	-0.162255833	0.374954289	0.041730329	0.512570685	Hus1	protein-coding	Downregulated
ENSMUSG00000029370	37.52211241	-0.158201389	0.377119027	0.041861733	0.512966951	Rassf6	protein-coding	Downregulated
ENSMUSG00000036594	304.3863123	-0.171359337	0.38362659	0.042028205	0.514103148	H2-Aa	protein-coding	Downregulated
ENSMUSG00000115276	44.7758716	-0.176291818	0.38777055	0.042031457	0.514103148			Downregulated
ENSMUSG00000047766	269.2213917	-0.340475662	0.53609461	0.042106902	0.514103148	Lrrc49	protein-coding	Downregulated
ENSMUSG00000036533	299.0127579	0.200950973	0.399250205	0.042450201	0.516533884	Cdc42ep3	protein-coding	Upregulated
ENSMUSG00000026096	136.778354	0.161030233	0.374206918	0.042470378	0.516533884	Osgepl1	protein-coding	Upregulated
ENSMUSG00000022240	80.04170604	0.352047706	0.539654062	0.042597456	0.517098802	Ctnnd2	protein-coding	Upregulated
ENSMUSG00000047935	23.73645011	-0.178924343	0.390015802	0.042600014	0.517098802	Sox1ot	ncRNA	Downregulated
ENSMUSG00000021298	208.0984812	-0.294188306	0.486803075	0.042653498	0.517098802	Gpr132	protein-coding	Downregulated
ENSMUSG00000068134	95.49371291	-0.205719362	0.407899279	0.04269893	0.51712048	Zfp120	protein-coding	Downregulated
ENSMUSG00000056310	780.6091604	0.15669766	0.368273166	0.042717232	0.51712048	Tyw1	protein-coding	Upregulated
ENSMUSG00000060093	393.0044972	0.246369475	0.437310253	0.042764128	0.51712048	H4c1	protein-coding	Upregulated
ENSMUSG00000053702	38.64400097	-0.236069448	0.4316656	0.042881233	0.51770595	Nebl	protein-coding	Downregulated
ENSMUSG00000038227	606.7994111	-0.412757995	0.550729405	0.042942905	0.517834075	Hoxa9	protein-coding	Downregulated
ENSMUSG00000012819	207.3329905	-0.227719209	0.428940353	0.042948221	0.517834075	Cdh23	protein-coding	Downregulated
ENSMUSG00000029394	1223.802369	0.421960599	0.555401877	0.042958482	0.517834075	Cdk2ap1	protein-coding	Upregulated
ENSMUSG00000065232	50.18709566	0.151401981	0.373281506	0.042983385	0.517839166	Gm22973	snRNA	Upregulated
ENSMUSG00000091510	66.94256883	0.142644874	0.366765905	0.043009944	0.517839166	Mtag2	ncRNA	Upregulated
ENSMUSG00000025374	1718.379606	0.138204882	0.36081406	0.043025542	0.517839166	Nabp2	protein-coding	Upregulated
ENSMUSG00000111497	116.2324351	0.138588621	0.361620386	0.043050385	0.51786546			Upregulated
ENSMUSG00000034875	274.2729138	0.225158257	0.419560183	0.043079216	0.51786546	Nudt19	protein-coding	Upregulated
ENSMUSG00000085843	22.9014009	-0.170811247	0.385568895	0.043222705	0.518416907	Kank4os	ncRNA	Downregulated
ENSMUSG00000027425	811.5331694	0.341799879	0.52589008	0.043251443	0.518416907	Kat14	protein-coding	Upregulated
ENSMUSG00000044576	24.99722809	0.212036275	0.416325888	0.043341969	0.5187095	Garem2	protein-coding	Upregulated
ENSMUSG00000055991	218.7086513	0.222002768	0.414476264	0.043387103	0.5187095	Zkscan5	protein-coding	Upregulated
ENSMUSG00000024639	644.0912183	0.310738099	0.496490907	0.043421057	0.518849362	Gnaq	protein-coding	Upregulated
ENSMUSG00000070953	179.1199166	-0.183635775	0.388087318	0.043480895	0.519141403	Rabepk	protein-coding	Downregulated
ENSMUSG00000039994	900.1111651	0.450061915	0.538835055	0.043561808	0.519141403	Timeless	protein-coding	Upregulated
ENSMUSG00000029730	2800.184628	0.416981841	0.563929784	0.043589786	0.519141403	Mcm7	protein-coding	Upregulated
ENSMUSG00000042087	97.11300998	-0.239922594	0.436962317	0.043601376	0.519141403			Downregulated
ENSMUSG00000068855	1306.760357	0.42380141	0.554537633	0.043649415	0.519379707	H2ac20	protein-coding	Upregulated
ENSMUSG00000047181	728.7683828	0.234517401	0.428212347	0.043686086	0.519379707	Samd14	protein-coding	Upregulated
ENSMUSG00000078377	83.87183014	0.193121692	0.394104232	0.043688226	0.519379707	Gm4294	pseudo	Upregulated
ENSMUSG00000089917	228.7010215	-0.159366833	0.370850882	0.043742352	0.519493357	Uckl1	protein-coding	Downregulated
ENSMUSG00000037110	631.4411834	0.423417914	0.545617713	0.043887792	0.520690125	Ralgapa2	protein-coding	Upregulated
ENSMUSG00000025035	148.1110639	-0.205825216	0.401580107	0.043956478	0.520992055	Arl3	protein-coding	Downregulated
ENSMUSG00000038876	327.6980947	-0.258396484	0.444962092	0.044039915	0.521433489	Rnf146	protein-coding	Downregulated
ENSMUSG00000001865	122.5755214	0.210625757	0.415077895	0.044215588	0.523007041	Cpa3	protein-coding	Upregulated
ENSMUSG00000015355	181.765128	0.250341791	0.437304912	0.044256852	0.523007041	Cd48	protein-coding	Upregulated
ENSMUSG00000022957	14122.86126	-0.429284583	0.529023118	0.044356334	0.523849648	Itsn1	protein-coding	Downregulated
ENSMUSG00000037808	500.8680252	-0.442901853	0.551800916	0.044615489	0.525313588	Fam76b	protein-coding	Downregulated
ENSMUSG00000034312	1551.155533	-0.216529221	0.408821289	0.044971024	0.528511941	Iqsec1	protein-coding	Downregulated
ENSMUSG00000027966	38.37722486	-0.209618005	0.410473272	0.04497781	0.528511941	Col11a1	protein-coding	Downregulated
ENSMUSG00000027223	81.34541009	0.192347899	0.395069201	0.045183189	0.529310743	Mapk8ip1	protein-coding	Upregulated
ENSMUSG00000025871	407.0505044	0.407622022	0.540101905	0.045199654	0.529310743	4833439L19Rik	protein-coding	Upregulated
ENSMUSG00000015536	204.6275712	0.279705716	0.466242864	0.045210148	0.529310743	Mocs2	protein-coding	Upregulated
ENSMUSG00000039748	274.7863218	0.229516628	0.427181851	0.045220757	0.529310743	Exo1	protein-coding	Upregulated
ENSMUSG00000036552	258.3595441	-0.225811973	0.416513752	0.045249095	0.529310743	Ermard	protein-coding	Downregulated
ENSMUSG00000102676	158.6424758	0.315431344	0.502710716	0.045287198	0.529310743			Upregulated
ENSMUSG00000029925	940.6372317	-0.335553913	0.499328106	0.045438211	0.529570762	Tbxas1	protein-coding	Downregulated
ENSMUSG00000013495	169.4932338	0.148794391	0.365099568	0.045449062	0.529570762	Tmem175	protein-coding	Upregulated
ENSMUSG00000000134	523.5599096	0.437757491	0.53875876	0.045454085	0.529570762	Tfe3	protein-coding	Upregulated
ENSMUSG00000053559	68.92710972	-0.185350826	0.393524356	0.045585002	0.530382255	Smagp	protein-coding	Downregulated
ENSMUSG00000033114	28.67644042	-0.187029523	0.394056156	0.04563364	0.530382255	Slc35d2	protein-coding	Downregulated
ENSMUSG00000027845	292.7724671	0.174006144	0.383553047	0.045765237	0.531145521	Dclre1b	protein-coding	Upregulated
ENSMUSG00000028522	1242.855924	0.262784268	0.443550502	0.045805566	0.531145521	Mier1	protein-coding	Upregulated
ENSMUSG00000032905	550.5909308	-0.382422968	0.537281764	0.045816888	0.531145521	Atg12	protein-coding	Downregulated
ENSMUSG00000042302	186.9378183	-0.177461296	0.382634246	0.045873219	0.531145521	Ehbp1	protein-coding	Downregulated
ENSMUSG00000020431	40.01152677	0.155236283	0.371535684	0.045900083	0.531145521	Adcy1	protein-coding	Upregulated
ENSMUSG00000026926	994.3802133	0.354352575	0.522781248	0.045951308	0.531145521	Pmpca	protein-coding	Upregulated
ENSMUSG00000096054	1869.550479	-0.216893743	0.409255941	0.045976565	0.531145521	Syne1	protein-coding	Downregulated
ENSMUSG00000041688	267.6687026	-0.167786884	0.377484526	0.046241865	0.532626778	Amot	protein-coding	Downregulated
ENSMUSG00000037405	808.0553354	-0.16149218	0.373293221	0.046282721	0.532834108	Icam1	protein-coding	Downregulated
ENSMUSG00000090164	253.910331	0.141391671	0.363340857	0.046374309	0.533045355	BC035044	protein-coding	Upregulated
ENSMUSG00000036880	439.1965164	0.389730917	0.535907452	0.046420608	0.533065776	Acaa2	protein-coding	Upregulated
ENSMUSG00000036908	568.1820848	-0.443564465	0.511116333	0.046440037	0.533065776	Unc93b1	protein-coding	Downregulated
ENSMUSG00000030641	108.8497144	0.222810173	0.423092801	0.046512117	0.533572516	Ddias	protein-coding	Upregulated
ENSMUSG00000030751	490.3473414	0.287826238	0.479095961	0.046529959	0.533572516	Psma1	protein-coding	Upregulated
ENSMUSG00000026622	263.0373842	0.205108508	0.408266782	0.04671737	0.534932247	Nek2	protein-coding	Upregulated
ENSMUSG00000044968	39.25892165	-0.201428331	0.401626142	0.046939169	0.53593866	Napepld	protein-coding	Downregulated
ENSMUSG00000018171	1487.733122	0.345564013	0.516025598	0.046949412	0.53593866	Vmp1	protein-coding	Upregulated
ENSMUSG00000000693	63.7625142	0.220162055	0.41617436	0.046950899	0.53593866	Loxl3	protein-coding	Upregulated
ENSMUSG00000041794	67.85368097	-0.155554071	0.374184856	0.04712685	0.536983506	Myrip	protein-coding	Downregulated
ENSMUSG00000031626	72.23335202	-0.239127435	0.435421129	0.047272648	0.537681792	Sorbs2	protein-coding	Downregulated
ENSMUSG00000041649	213.5176666	-0.399911798	0.532870752	0.047332789	0.537681792	Klf8	protein-coding	Downregulated
ENSMUSG00000030161	1457.961479	-0.416199833	0.522918969	0.04742409	0.538003803	Gabarapl1	protein-coding	Downregulated
ENSMUSG00000042185	769.7251932	-0.209273856	0.40313813	0.047540206	0.539058764	Nfrkb	protein-coding	Downregulated
ENSMUSG00000028383	192.2435516	0.351578215	0.5273969	0.047672092	0.539861319	Hsdl2	protein-coding	Upregulated
ENSMUSG00000038146	27.60677833	-0.203723623	0.406514737	0.047889937	0.541243286	Notch3	protein-coding	Downregulated
ENSMUSG00000039703	947.8193588	0.294310694	0.468072736	0.047921685	0.541243286	Nploc4	protein-coding	Upregulated
ENSMUSG00000027340	611.6144121	-0.309306009	0.48072119	0.047941809	0.541243286	Slc23a2	protein-coding	Downregulated
ENSMUSG00000028729	814.3303805	0.193803932	0.39366784	0.048137579	0.542140762	Ebna1bp2	protein-coding	Upregulated
ENSMUSG00000000056	690.6781273	0.277541837	0.456181865	0.048350273	0.543224051	Narf	protein-coding	Upregulated
ENSMUSG00000000278	110.4807613	0.21899129	0.412245854	0.048382538	0.543324714	Scpep1	protein-coding	Upregulated
ENSMUSG00000050473	197.5310043	0.226953579	0.425439916	0.04857285	0.544151304	Slc35d3	protein-coding	Upregulated
ENSMUSG00000031095	574.9640973	0.182994764	0.382206365	0.048678631	0.544551308	Cul4b	protein-coding	Upregulated
ENSMUSG00000030592	174.9548444	-0.254271371	0.441761436	0.048833312	0.545086503	Ryr1	protein-coding	Downregulated
ENSMUSG00000008333	486.0696003	0.270398617	0.450379326	0.048833331	0.545086503	Snrpb2	protein-coding	Upregulated
ENSMUSG00000020097	262.5992941	-0.36106395	0.512122517	0.048859056	0.545086503	Sgpl1	protein-coding	Downregulated
ENSMUSG00000041035	43.8766149	-0.269006347	0.461437206	0.048866761	0.545086503	Dpcd	protein-coding	Downregulated
ENSMUSG00000026925	426.9621663	0.206428627	0.405625342	0.048909061	0.545251492	Inpp5e	protein-coding	Upregulated
ENSMUSG00000031751	1379.623791	0.256685835	0.439230035	0.048928328	0.545251492	Amfr	protein-coding	Upregulated
ENSMUSG00000016319	2904.504654	0.397384823	0.526902559	0.049037451	0.545685012	Slc25a5	protein-coding	Upregulated
ENSMUSG00000033964	295.3011173	-0.215752586	0.410014371	0.049102435	0.545915716	Zbtb41	protein-coding	Downregulated
ENSMUSG00000025855	124.7590074	0.246008227	0.438035021	0.049133829	0.545915716	Prkar1b	protein-coding	Upregulated
ENSMUSG00000037316	338.090918	0.220992608	0.413799187	0.04915185	0.545915716	Bag4	protein-coding	Upregulated
ENSMUSG00000111264	146.7798777	-0.240499888	0.430310757	0.04924189	0.546507301			Downregulated
ENSMUSG00000090394	527.0881365	0.378360322	0.539048282	0.049328929	0.546507301	4930523C07Rik	protein-coding	Upregulated
ENSMUSG00000009090	2070.101577	0.180519728	0.382978102	0.049332493	0.546507301	Ap1b1	protein-coding	Upregulated
ENSMUSG00000063480	754.5569995	0.299594621	0.475825879	0.049366951	0.546507301	Snu13	protein-coding	Upregulated
ENSMUSG00000031530	494.4747174	-0.195939545	0.398276509	0.049378171	0.546507301	Dusp4	protein-coding	Downregulated
ENSMUSG00000070695	20.94135107	-0.154004893	0.373994491	0.049425155	0.546507301	Cntnap5a	protein-coding	Downregulated
ENSMUSG00000042228	1679.465742	0.200612421	0.395286274	0.049448763	0.546507301	Lyn	protein-coding	Upregulated
ENSMUSG00000026974	406.2220402	0.374815796	0.534220808	0.049453178	0.546507301	Zmynd19	protein-coding	Upregulated
ENSMUSG00000020744	295.8567102	-0.213515019	0.411518334	0.049479304	0.546507301	Slc25a19	protein-coding	Downregulated
ENSMUSG00000052533	1637.562285	0.180135755	0.381030604	0.04948642	0.546507301	Nup188	protein-coding	Upregulated
ENSMUSG00000079173	169.6244183	-0.232735608	0.429777865	0.049592437	0.546727561	Zan	protein-coding	Downregulated
ENSMUSG00000032661	313.4532044	0.315066992	0.486357283	0.049620162	0.546727561	Oas3	protein-coding	Upregulated
ENSMUSG00000025402	304.4544944	-0.228902372	0.420490091	0.049694618	0.546727561	Nab2	protein-coding	Downregulated
ENSMUSG00000105827	1188.1703	0.343666097	0.522746704	0.04976926	0.546727561	H2bc18	protein-coding	Upregulated
ENSMUSG00000001521	58.45519407	-0.294850463	0.48193041	0.049815234	0.546727561	Tulp3	protein-coding	Downregulated
ENSMUSG00000031939	6469.169058	0.415444021	0.523536636	0.049891104	0.546727561	Taf1d	protein-coding	Upregulated
ENSMUSG00000056220	708.4072829	0.339120535	0.504834226	0.049927133	0.546727561	Pla2g4a	protein-coding	Upregulated
ENSMUSG00000055660	466.876941	0.151578375	0.365008291	0.049945963	0.546727561	Mettl4	protein-coding	Upregulated
ENSMUSG00000027598	947.5280864	-0.155342461	0.367179921	0.049951354	0.546727561	Itch	protein-coding	Downregulated
ENSMUSG00000030493	84.40143706	0.253300973	0.445316741	0.049951945	0.546727561	Faap24	protein-coding	Upregulated
