# Supplementary material for: Differential sensitivity to LINE 1-induced damage contributes to the expansion of Tet2-deficient HSCs upon chronic inflammatory stress
Source: Research Square preprint supplement (doi:10.21203/rs.3.rs-7934135/v1), 2025-10-29
Supplement: Supplementary file 3 [file f3b7dca536febd0c012feefe.xlsx]

## Sheet: WT-LPS vs WT p<0.05
Table S3. Differentially expressed TE subfamilies in WT-LPS vs WT pvalue<0.05
TE subfamily	baseMean	log2FoldChange	lfcSE	stat	pvalue	padj
Charlie16a:hAT-Charlie:DNA	31.6069687357762	4.56586852551594	2.29054713894831	1.99335278802091	0.0462228297981171	0.896941525835033
Charlie20a:hAT-Charlie:DNA	37.5456528748276	5.59441933288309	2.26791781610485	2.46676457725065	0.0136339963598135	0.72741539403436
Charlie25:hAT-Charlie:DNA	58.5737758824182	4.30495337497168	1.82862383699723	2.35420390343418	0.0185624256666835	0.780087986980222
Charlie2a:hAT-Charlie:DNA	52.7712896965911	5.96419184965058	1.91663712634419	3.11180022951278	0.0018595028569575	0.440670116704841
Charlie4z:hAT-Charlie:DNA	82.8080096580965	4.66675601173886	1.73089026212598	2.6961593775488	0.00701440962290967	0.587884513822521
Charlie5:hAT-Charlie:DNA	180.008009550348	2.11384644601041	0.979183130954682	2.15878560320934	0.0308668039162837	0.844374926921073
Charlie7a:hAT-Charlie:DNA	14.3199709905357	7.56653157016844	3.73379424520585	2.02649933907949	0.0427136403872769
ERVB3_1-LTR_MM:ERVK:LTR	53.8282753739405	4.2665915054991	1.72020108083253	2.48028649268967	0.0131276857328412	0.720640764460762
ERVB4_1B-LTR_MM:ERVK:LTR	32.7371942344871	6.14746951750605	2.38078299480624	2.5821208950656	0.00981951800402562	0.654045453854216
HAL1b:L1:LINE	77.2618414729666	3.54474230747396	1.7068753446723	2.07674351764364	0.0378252377897636	0.866491102976702
IAPEY5_I-int:ERVK:LTR	52.1958010670118	4.62257609826307	1.90416175105504	2.42761734695166	0.0151983692350991	0.750118659452404
L1M3b:L1:LINE	45.531979740149	6.59853403125334	2.1292548515774	3.09898743514192	0.00194183255175427	0.452381159726483
L1M4a1:L1:LINE	61.0929286080551	4.14853789423929	1.90743299093819	2.17493244268507	0.0296351793182409	0.837290623907213
L1MCb:L1:LINE	81.3106545586206	3.92850235317515	1.71909475211726	2.28521572085353	0.0223001818365671	0.807520216119448
L1MCc:L1:LINE	44.4828473793371	4.21441903905418	2.13215718359192	1.9765986633098	0.0480870133762166	0.902892679948832
L1ME3F:L1:LINE	116.88738551583	3.27357863574139	1.51503270907141	2.16073132688192	0.0307160995367077	0.844374926921073
L1MEi:L1:LINE	62.4861234036115	3.96076592074157	1.55790800210697	2.54236188233508	0.0110106108232315	0.672762971264067
LTR10_RN:ERVK:LTR	51.29222220839	5.61596530401591	1.91225852808233	2.9368232493374	0.00331593037053373	0.490836389899474
LTR16B1:ERVL:LTR	26.8294594732554	6.88023159185924	2.78221274527008	2.47293511380682	0.0134008471383324	0.726425453224768
LTR16B:ERVL:LTR	26.7002514311554	8.04546855518385	2.94562885593471	2.73132459949061	0.00630803085110054	0.575986381270139
LTR40a:ERVL:LTR	67.2063756574879	3.47514208172423	1.65119171177279	2.10462665052574	0.0353238198916314	0.860722598873036
LTR41:ERVL:LTR	53.5909677539693	4.86292559380522	1.88120470524353	2.58500607629284	0.00973772812829306	0.654045453854216
LTR48:ERV1:LTR	74.9875148620496	4.85838630833946	1.64977018759827	2.94488671504744	0.00323072929245876	0.490836389899474
MER102a:hAT-Charlie:DNA	52.0443265123748	4.63620865514354	1.89349493390664	2.44849276970505	0.0143455309170575	0.741275648326898
MER104:TcMar-Tc2:DNA	30.7915109595355	4.92554426567839	2.35073230045841	2.09532334443947	0.0361422586387673	0.860722598873036
MER113:hAT-Charlie:DNA	59.5713504485121	4.29201552482716	1.87851496279163	2.28479176894544	0.0223250405329495	0.807520216119448
MER113B:hAT-Charlie:DNA	26.7644295035183	7.25582191306215	2.78803212389557	2.60248863378373	0.00925498829445064	0.654045453854216
MER20B:hAT-Charlie:DNA	234.486544223998	3.43207316591228	1.16028579227684	2.9579550044972	0.00309687325274876	0.490836389899474
MER45B:hAT-Tip100:DNA	66.4674804264781	4.10940703623587	1.73072955585481	2.374378493933	0.0175785207696085	0.776919517490068
MER46C:TcMar-Tigger:DNA	161.127938769048	2.33973478739604	1.09804989337972	2.130809174977	0.0331048661856625	0.85549633224961
MER53:hAT:DNA	193.679102806043	1.92136041238634	0.957637686370311	2.0063542190667	0.044818469090854	0.891855421343625
MER5C1:hAT-Charlie:DNA	40.0225949255241	4.45641655277951	2.10969920004684	2.1123468941357	0.0346567064104467	0.859621793007051
MER63B:hAT-Blackjack:DNA	96.9203196385361	3.75952476569297	1.58459213332486	2.37255044161085	0.0176657508191896	0.776919517490068
MER68B:ERVL:LTR	36.7651353279941	4.50588381147483	2.17601892662466	2.07070065261985	0.038386779214047	0.869808757227832
MER74C:ERVL:LTR	15.8554406527446	6.70107996446708	3.3422284507678	2.00497364652846	0.0449658644591584	0.891855421343625
MER81:hAT-Blackjack:DNA	86.9031866085271	3.21502781406747	1.56735040103873	2.05125019391757	0.0402425880753785	0.879054906225074
MER90:ERV1:LTR	21.2424783606697	6.55917440028741	3.25425408089996	2.01556923252701	0.0438450397721001	0.889637602025401
MLT1B:ERVL-MaLR:LTR	1237.9485699426	1.32631704619494	0.673524250472288	1.96921943829773	0.0489278976529654	0.905912586033381
MLT1E3:ERVL-MaLR:LTR	191.05977227232	2.42276800536007	1.0084568201564	2.40245091007896	0.0162856202218079	0.757041721418392
MLT1F-int:ERVL-MaLR:LTR	60.9573203777796	4.34391818055577	1.78652890146598	2.43148497457347	0.0150370719970152	0.750118659452404
MLT1F1:ERVL-MaLR:LTR	109.448381904822	3.74455027761147	1.32184708743147	2.83281652864073	0.00461398601126255	0.538419554758249
MLT1G3:ERVL-MaLR:LTR	99.4357365568184	4.53708196664625	1.58112408834429	2.869529343138	0.0041108318807658	0.526943787620623
MLT1H-int:ERVL-MaLR:LTR	55.443520571028	5.5024142328353	1.87529424777212	2.93416046008367	0.00334451256998354	0.490836389899474
MLT1O:ERVL-MaLR:LTR	35.0976300899797	4.92297606687495	2.39655737653338	2.05418660745608	0.0399576341173394	0.879054906225074
MLTR18A_MM:ERVK:LTR	80.271087539377	-3.23230779694313	1.62722795024157	-1.98638905905179	0.046990140542917	0.901283055278319
MLTR31C_MM:ERVK:LTR	33.9355166713503	4.69724971338615	2.23595558225385	2.10077952829962	0.0356603243136378	0.860722598873036
MLTR31FA_MM:ERVK:LTR	76.914652281863	4.384365472942	1.63744727923583	2.67756130443974	0.00741602798416051	0.606745860965989
MMERVK9C_I-int:ERVK:LTR	110.608824863808	2.41750816096247	1.17925336180817	2.05003287610362	0.0403612227365991	0.879054906225074
MRLTR33:ERVK:LTR	152.591925384156	2.91626604113759	1.05409889218259	2.76659624895274	0.00566448610011739	0.556131153186525
MT2B1:ERVL:LTR	493.506998937939	1.92250989658229	0.709148244770882	2.71101269834409	0.00670780573264421	0.58698186136012
MTB_Mm:ERVL-MaLR:LTR	874.723976979551	2.18046919979294	0.630392672255816	3.45890632261046	0.00054237350727967	0.276108291020706
MTE2a-int:ERVL-MaLR:LTR	98.9589626726952	3.67069804962407	1.60015949375563	2.29395761106839	0.0217929336915362	0.807520216119448
MTEb:ERVL-MaLR:LTR	1177.23378368075	1.394690889432	0.682810154868644	2.04257490824856	0.0410945370948496	0.879054906225074
MURVY-LTR:ERV1:LTR	63.5575368312029	3.55575459929994	1.70231560787964	2.08877518530709	0.0367279651660211	0.862522305123629
MYSERV-int:ERVK:LTR	215.241719088039	2.01025213721277	0.915638177621807	2.19546561768974	0.0281302146333112	0.831504946526586
MamGypLTR1d:Gypsy:LTR	21.9334662226524	6.29139733943023	3.00065587829907	2.09667405880494	0.0360224384109736	0.860722598873036
MamRep137:TcMar-Tigger:DNA	60.3000895398949	4.34364817765992	1.80830023148713	2.40206139557242	0.0163029719563364	0.757041721418392
ORR1A1:ERVL-MaLR:LTR	400.585568415729	2.58820262004948	0.755853449183605	3.42421222373859	0.000616584494003501	0.292239788623383
ORR1E:ERVL-MaLR:LTR	2252.1790740803	1.2608009159242	0.632255923874026	1.99413064918219	0.0461377785703613	0.896941525835033
ORR1F:ERVL-MaLR:LTR	2341.73219493978	1.31931655284107	0.63780811912591	2.06851639745374	0.0385914903189672	0.869808757227832
RLTR10D2:ERVK:LTR	18.1677915488792	7.13755618177964	3.187016028725	2.23957335559278	0.0251186340921085	0.827574711856014
RLTR12B:ERVK:LTR	165.103436963778	3.96265486939508	1.3516651204003	2.9316838983176	0.00337129700211368	0.490836389899474
RLTR12E:ERVK:LTR	212.586648602941	3.1493595832445	0.945747333035279	3.33002216684763	0.00086839070481433	0.322595411828999
RLTR13D1:ERVK:LTR	34.494831816855	4.07646283281287	1.94178733346946	2.09933537136084	0.0357873474561452	0.860722598873036
RLTR13D6:ERVK:LTR	43.8621094648762	4.71004755774146	2.15794078324968	2.18265839095386	0.0290609762678337	0.835411597460684
RLTR13E:ERVK:LTR	67.2825119237558	5.38180578257283	1.72056779700394	3.127924277058	0.00176045530225364	0.424516809289058
RLTR15:ERVK:LTR	683.505880244037	1.38809124046472	0.667125782375999	2.0807039349026	0.0374610136962063	0.862522305123629
RLTR16:ERVK:LTR	294.265289827006	1.9240941884561	0.862428449575773	2.23101892035514	0.0256798757579135	0.827574711856014
RLTR17D_Mm:ERVK:LTR	137.701815331346	2.41374521861015	1.12167774823092	2.15190612670801	0.0314047486209629	0.848051610599481
RLTR18-int:ERVK:LTR	57.4677137660411	4.21412282505986	1.9331401567277	2.17993651955028	0.0292621674180048	0.835411597460684
RLTR19B:ERVK:LTR	28.3052987397352	5.15546900301368	2.4223911636645	2.12825619592118	0.0333158478206241	0.85549633224961
RLTR1B:ERV1:LTR	168.695200878715	2.97656603082285	1.01327132065743	2.93758045859976	0.00330784326312451	0.490836389899474
RLTR22_Mus:ERVK:LTR	63.4224079384691	4.4467231929652	1.84000040407805	2.41669685675601	0.015662054704931	0.750118659452404
RLTR26B_MM:ERVK:LTR	52.8664702815592	4.44472796106126	2.002388982106	2.21971255374495	0.0264382861318045	0.827574711856014
RLTR26C_MM:ERVK:LTR	61.2058986299108	4.37430735726184	1.86647175430146	2.34362365633492	0.019097430512856	0.783795451518727
RLTR26_Mus:ERVK:LTR	129.840317305447	2.70684607068799	1.1199512841395	2.4169319764366	0.0156519418502024	0.750118659452404
RLTR27:ERVK:LTR	47.6822136293853	3.93157719753232	1.96982338159597	1.9959034065008	0.045944437856853	0.896941525835033
RLTR28B:ERVL:LTR	73.209418208637	3.84757876781658	1.71879003229128	2.23853914412539	0.0251859177195141	0.827574711856014
RLTR31A_Mm:ERVK:LTR	31.4209343620627	6.4116561991339	2.44555758304968	2.62175638127415	0.00874779378101059	0.646443147956938
RLTR34C_MM:ERVK:LTR	58.0204065770828	4.16285489091967	1.82153588107922	2.28535431783714	0.0222920603341471	0.807520216119448
RLTR3_Mm:ERVK:LTR	47.7982803242469	-4.59055395731525	2.01823910194469	-2.27453424764786	0.0229338843831783	0.808272412427656
RLTR41:ERV1:LTR	56.473078273583	4.51547671536344	1.90737545128265	2.36737696939893	0.0179146752010442	0.776919517490068
RLTR42:ERVK:LTR	27.6109438007106	6.283450357457	2.76940130329088	2.26888401835818	0.0232753798467117	0.814028896317986
RLTR45-int:ERVK:LTR	43.1283959335367	4.53176992545235	2.23058900470479	2.03164720882864	0.042189383828299	0.879858622527122
RLTR9A3B:ERVK:LTR	16.6170741176943	7.39590396807782	3.5309913469915	2.09456870359632	0.0362093497280517	0.860722598873036
RMER10B:ERVL:LTR	384.084609293493	1.65244967952906	0.768506073801034	2.15021030524331	0.0315385833803448	0.848743921465314
RMER13A:ERVK:LTR	155.982393334109	2.2240913290173	1.08626528926663	2.04746607573077	0.0406123444482796	0.879054906225074
RMER16C:ERVK:LTR	44.4976124826781	4.63251176664515	2.04625803780738	2.26389423086104	0.023580620871171	0.818633692277946
RMER17B:ERVK:LTR	379.682403938012	1.69927175131064	0.813513544966867	2.0888057264982	0.0367252147225421	0.862522305123629
RMER19B:ERVK:LTR	1549.29983261907	1.29286678082494	0.657511626266769	1.96630254002595	0.0492636735973389	0.905912586033381
RMER1C:RMER1C:Other	821.140767652705	1.49250134492342	0.751908951517961	1.98494956325542	0.047150083268279	0.901411997860912
SUBTEL_sa:Satellite:Satellite	34.220512844278	-5.16038301303558	2.52796193866612	-2.04132148277457	0.0412188831069482	0.879054906225074
Tigger10:TcMar-Tigger:DNA	51.7787576096803	4.06943950018435	1.93770494500551	2.10013372297648	0.0357170795424373	0.860722598873036
Tigger13a:TcMar-Tigger:DNA	102.259262245983	4.53567241077283	1.53486012566798	2.95510472578007	0.00312562932374306	0.490836389899474
Tigger1:TcMar-Tigger:DNA	370.94964530774	1.68584030540582	0.780078640655611	2.1611158382557	0.0306863924188878	0.844374926921073
UCON2:UCON2:Unknown	16.6354566829304	7.87875061759614	3.51100650601362	2.24401481572349	0.0248314481021301	0.827574711856014
Zaphod:hAT-Tip100:DNA	52.8567451943143	4.08546225147387	1.94187951482502	2.10387010125188	0.0353897797124045	0.860722598873036

## Sheet: Tet2-- LPS vs Tet2--p<0.05
Table S3. Differentially expressed TE subfamilies in Tet2-/- LPS vs Tet2-/- HSCs pvalue<0.05
TE subfamily	baseMean	log2FoldChange	lfcSE	stat	pvalue	padj
BGLII_C:ERVK:LTR	31.2244606205533	-6.78009030304412	2.22608639293472	-3.04574446192348	0.0023210500814573	0.17233489968267
C573_MM:C573_MM:Other	77.5119212863529	6.48545487519029	2.41160802875603	2.6892657504278	0.0071609386002208	0.314122044952365
Charlie13b:hAT-Charlie:DNA	30.8255288100337	-6.59960695984633	2.09344382605153	-3.15251208449855	0.00161872121269761	0.141055367006969
Charlie4:hAT-Charlie:DNA	31.327349571286	-5.70029097862652	2.32462918508993	-2.45212914609691	0.0142013682236339	0.446337473219896
ERV3-16A3_LTR:ERVL:LTR	43.3919823552998	3.30082201110266	1.5638063470144	2.1107613595536	0.0347928289490985	0.679215879967899
ERVB5_1-I_MM-int:ERVK:LTR	80.6081654494733	-3.65728462424906	1.58779298171182	-2.30337623756599	0.0212576835365709	0.547220186249459
ERVB7_2-LTR_MM:ERVK:LTR	49.9691140611817	-4.09201472027578	1.59316008676851	-2.56848935286587	0.0102142849886709	0.375703188947347
ERVL-B4-int:ERVL:LTR	204.022044431102	-3.02475619436303	1.54080936768622	-1.96309566763941	0.0496350588702865	0.787708699894353
HAL1_SS:L1:LINE	29.0224384730081	-3.45486457186775	1.64663392146723	-2.09813761688408	0.0358929904289982	0.690466385283549
HAL1b:L1:LINE	175.090784372519	-3.27679322516158	1.53298004306576	-2.13753156147318	0.0325547814869114	0.654902649825066
IAP1-MM_LTR:ERVK:LTR	41.2308910506029	-3.52773134786418	1.51531055165547	-2.32805832706052	0.0199090067263134	0.529356456280287
Kanga1d:TcMar-Tc2:DNA	17.9252052170756	-5.81735928645298	2.34998456062806	-2.47548830061174	0.0133054120953602	0.43299356373928
L1M3de:L1:LINE	22.8466696718637	-5.80215056291705	2.37444611414148	-2.44358064323347	0.0145423191300493	0.453031848827931
L1ME3D:L1:LINE	74.2742981822845	-3.34589057651434	1.41696332671552	-2.36131063763663	0.0182104694932104	0.509420596486487
L1ME3E:L1:LINE	164.470431688151	-2.82870254103808	1.29215162824395	-2.1891413354347	0.0285865689661465	0.612440707628684
LTR105_Mam:ERVL:LTR	30.8782638123311	-5.49398643682057	1.74314144972921	-3.15177316084936	0.00162282291421979	0.141055367006969
LTR16B:ERVL:LTR	76.678718337104	-5.14137173936377	1.90000927903493	-2.70597191081889	0.00681048063175685	0.308354912462277
LTR16D1:ERVL:LTR	41.3152395439335	-3.23047292155172	1.59998072726642	-2.01906989659245	0.0434799551878535	0.747916633784148
LTR16E1:ERVL:LTR	16.1475921870547	-5.42843642352245	2.24825674217833	-2.41450912686371	0.0157564282141325	0.473983622362139
LTR41B:ERVL:LTR	53.0331333765777	-5.16817070823043	1.7904780156505	-2.88647537867298	0.00389583227685416	0.224824648731079
LTR48B:ERV1:LTR	28.2009195111474	-4.39728953371012	2.05811888789041	-2.13655759129513	0.0326339920540014	0.654902649825066
LTR73:ERV1:LTR	23.1341235896673	5.62641447102745	2.19710586997628	2.56082992991512	0.0104422460133933	0.378962026068532
LTR75B:ERVL:LTR	39.9075593789634	-6.18980065016826	2.0920245000905	-2.95876107086723	0.00308878482957348	0.195036677960646
LTR78B:ERV1:LTR	36.938828471145	-5.4801563493982	2.32357818739028	-2.35849879256838	0.0183490194798928	0.509610539046095
LTR81C:Gypsy:LTR	27.6477389214099	-6.12380704634235	2.08944469097948	-2.93082993427869	0.00338057795670807	0.207365591394008
LTR82A:ERVL:LTR	25.3661123503793	-6.17569596594781	2.16939604448631	-2.84673514623751	0.00441700942223279	0.242007430639922
LTR82B:ERVL:LTR	20.5019351589826	-6.02543246857479	2.18468987647635	-2.75802645192512	0.00581514920720653	0.284316374953733
LTR85a:Gypsy:LTR	29.9131050386882	-4.17668039911909	1.9362855100955	-2.15705812874315	0.0310011355319959	0.642303356417796
LTR90B:LTR:LTR	9.88423055728747	-5.2700404591808	2.62580462896977	-2.00701925841622	0.0447476124225349
MER127:TcMar-Tigger:DNA	10.8827951133537	-4.86391964706313	2.45615935484436	-1.98029481982505	0.0476704105425493
MER45A:hAT-Tip100:DNA	48.7273446092442	-4.03661809757618	1.55114297011003	-2.60235076673161	0.00925871008295751	0.360890502998757
MER63C:hAT-Blackjack:DNA	55.6125351855483	-4.55729708817597	1.40423686517115	-3.24539057562808	0.00117289631718553	0.119666348450648
MER76:ERVL:LTR	33.46430475625	-6.64489272550727	2.12505784750651	-3.12692321919811	0.00176646053938384	0.149840547319662
MLT1A1-int:ERVL-MaLR:LTR	25.0205123099584	-4.0987249363424	2.00805792943035	-2.04113879199946	0.0412370335212131	0.735942546276554
MLT1E1A:ERVL-MaLR:LTR	81.2525281131764	-3.28778567136726	1.54378757592051	-2.12968786810378	0.0331973912511525	0.659312364185442
MLT2C2:ERVL:LTR	28.4890338821689	-4.80617216165474	2.0374102430135	-2.35896142082117	0.0183261608516024	0.509610539046095
MLTR13:ERVK:LTR	47.6946319573462	-7.15333765047819	1.9043963977305	-3.7562230526181	0.000172496964596705	0.0503132669232817
MLTR31A_MM:ERVK:LTR	45.9098010984594	-3.43531743010734	1.52280340105903	-2.25591657315598	0.0240758563936203	0.57557238349502
MLTR31E_MM:ERVK:LTR	58.3443530938498	-3.76933890050437	1.65034623530737	-2.28396855148541	0.0223733792484395	0.554759296194515
MurSAT1:Satellite:Satellite	15.6934376017984	-5.98098301938545	3.05076770863089	-1.960484569987	0.0499391797307857	0.788333620839903
RLTR12B2:ERVK:LTR	27.7191800890915	-6.36130504270777	2.30181517954103	-2.76360374162454	0.00571669166109739	0.281859969547713
RLTR12F:ERVK:LTR	37.6342300774889	-6.04888870558068	2.71306520955959	-2.22954047852119	0.0257779651510446	0.58829745104029
RLTR13C1:ERVK:LTR	46.277665341635	-3.59040093906163	1.55030044351934	-2.31593879371605	0.0205616107980215	0.53640597841304
RLTR13D1:ERVK:LTR	67.3145677875291	-3.69147017253633	1.47838685793878	-2.49695818974142	0.0125263725007126	0.419147577427921
RLTR13D3A:ERVK:LTR	74.2099086718406	3.6760205586744	1.35959093166489	2.70376954792787	0.00685578181702128	0.308460212700149
RLTR24B_MM:ERV1:LTR	17.9741674463065	-4.9416423891589	2.40904634152667	-2.05128573243936	0.0402391290884596	0.729204922620293
RLTR31A_Mm:ERVK:LTR	16.4279074377348	-5.98883890888199	3.02899057923719	-1.97717317113287	0.0480220591092673	0.772798416362964
RLTR44-int:ERVK:LTR	121.702302262909	-3.38428651533434	1.50092931432865	-2.25479406859883	0.0241462577640727	0.576277043348996
RLTR44A:ERVK:LTR	45.4757659772314	-3.25981754375716	1.66206824770672	-1.96130185884664	0.0498438205873255	0.788333620839903
RLTR46A2:ERVK:LTR	37.7080130056342	6.26255574404653	2.67361428285419	2.34235573328888	0.0191624407035168	0.520900246228224
RLTR48B:ERV1:LTR	113.640463728795	-3.35348732786787	1.57908109348702	-2.12369544648433	0.0336956184034151	0.666387644295629
RLTR9A3A:ERVK:LTR	64.410311436578	-6.61365224724066	1.92606514982227	-3.43376351929266	0.000595263276322425	0.0873114811864174
RLTR9C:ERVK:LTR	24.8647171391736	-5.49684105236959	2.41616654970316	-2.2750257233074	0.022904386776994	0.557987318696976
RLTR9F:ERVK:LTR	15.535140325223	-4.75100394509222	2.37141456205276	-2.00344723403386	0.0451293058862554	0.757104274068426
RMER16A2:ERVK:LTR	42.7952591036024	-6.99815851051875	2.35858932593781	-2.96709496373905	0.00300628090206305	0.191675953715597
RMER16C:ERVK:LTR	29.0736300956112	-6.72326945411374	2.257088668712	-2.97873519428475	0.00289440800354523	0.191675953715597
RMER17A-int:ERVK:LTR	53.5239160829291	3.76386049723882	1.88553105954615	1.99618058699324	0.0459142697373335	0.759716606546879
Ricksha_c:MULE-MuDR:DNA	58.9385700428738	2.54157488895352	1.26759321571726	2.00503983252655	0.0449587888639639	0.755447143190305
X6B_LINE:CR1:LINE	34.3818358227518	-6.74830052186911	2.03061289331373	-3.32328261289459	0.000889647330847623	0.106407483513148
